# Supplementary material
Source: publisher figshare collection journal article supplement (https://acs.figshare.com/ndownloader/files/13686212)
Supplement: Supplementary file 1 [file 13686212]

## Sheet: Cover Page
Supporting Information
Plasma functionalization of PCL nanofibers changes protein interactions with cells resulting in increased cell viability
Mahtab Asadianᵃǂ
Maarten Dhaenensꙺꙺꙺꚝǂ
Iuliia Onushchenkoᵃ
Stijn De Waeleᶜ
Heidi Declercqᵈ
Pieter Coolsᵃ
Bart Devreeseᶜ
Dieter Deforceꚝ
Rino Morentᵃ
Nathalie De Geyterᵃ
a Department of Applied Physics, Research Unit Plasma Technology (RUPT), Faculty of Engineering & Architecture, Ghent University, Sint-Pietersnieuwstraat 41, B4, 9000 Ghent, Belgium
b Laboratory for Pharmaceutical Biotechnology, Ghent University, Ottergemsesteenweg 460, B-9000 Ghent, Belgium
c Laboratory of Microbiology – Protein Research Unit, Ghent University, Karel Lodewijk Ledeganckstraat 35, 9000 Ghent, Belgium
d Department of Basic Medical Sciences, Tissue Engineering Group, Faculty of Medicine and Health Sciences, Ghent University, De Pintelaan 185, B3, 9000, Ghent, Belgium
ǂThese authors contributed equally to this work
Corresponding author’s e-mail address: Mahtab.asadian@ugent.be

## Sheet: S2-LEGEND Supplementary Table 1
Supplementary Table 1 contains all the preprocessed results from the BSA blocking experiments.
The data is presented in an interactive way, i.e. with pivot tables, to allow future readership to actively search for candidate biomarker proteins
Detailed descriptions can be found in the respective tabs. Here, an overview of the different tabs is given.
1D PAGE Intensities
Additional information to Figure 9: SDS-PAGE analysis of the serum proteins interacting with the different NFs under study.
The upper part of the table depicts the numeric values used to generate the bar chart in Figure 9B: Relative density of different molecular weight (MW) fractions in each of the lanes, showing that on plasma-treated NFs relatively more HMW proteins attach.
The lower part of the table depicts the numeric values and the bar chart for the Relative density of different molecular weight (MW) fractions in each of the lanes of proteins after cells were detached, showing no significant differences in MW distribution.
In conclusion, the differences seen when cells are detached are more subtle and require mass spectrometry to resolve. These results are given in the next tabs.
Protein Data
This table is a comprehensive overview of all the proteins that were annotated by mass spectrometry in the BSA coating experiment.
The mass spectrometry proteomics data have been deposited to the ProteomeXchange Consortium via the PRIDE [1] partner repository with the dataset identifier PXD010910 and 10.6019/PXD010910
The search parameters that were used are depicted in the header.
Peptide Data
This table is a comprehensive overview of all the peptides that were annotated by mass spectrometry in the BSA coating experiment.
This table is the one that is used to generate the pivot table Unique peptides per protein and BSA Block
Column AF depicts the sample where this specific annotation was made (parsed from the scan title of the MSMS spectrum usually depicted here)
!Deleting this tab will disable the pivot table in the next tab!
Unique peptides per protein
This tab contains a pivot table that was generated from the Peptide Data tab with the following fields:
ROWS: Samples (from column AF) were grouped according to treatment. Groups are now called Sample (2)
COLUMNS: depict all the proteins identified, depicted by the number that is attributed to them in the Peptide Data tab. The same number is repeated in columns W-X-Y to provide a more accessible legend.
VALUES: the sum of different peptides identified for each protein, as a proxy for protein abundance.
FILTERS: these can be set dynamically by the user. The user can pick a medium protein of interest by clicking the filter icon. The radar chart will react interactively, so that users can monitor life how it binds to different conditions.
RADAR CHART: Interactive radar chart representing the 5 most differential proteins as measured by the number of unique peptides per protein. Each treatment is located on one angle of the radar chart and each protein is represented by another color. The number of unique peptides found for each protein is shown on the radius, whereby no peptide identification (0) is located in the center, increasin…
BSA Block
This tab contains a pivot table that was generated from the Peptide Data tab with the following fields:
ROWS: Samples (from column AF) were grouped according to treatment. Groups are now called Sample (2)
COLUMNS: depict all the proteins identified, depicted wy the number that is attributed to them in the Peptide Data tab. The same number is repeated in columns W-X-Y to provide a more direct legend. Note that a different selection is shown here
VALUES: the sum of different peptides identified for each protein, as a proxy for protein abundance.
FILTERS: these can be set dynamically by the user. The user can pick a medium protein of interest by clicking the filter icon. The line plots will react interactively, so that user can monitor life how it binds to different conditions.
LINE PLOTS: The selection of proteins depicted can be adjusted. In the original format these are the proteins that differ most before and after BSA blocking, when considering the number of unique peptides as a proxy for abundance.

## Sheet: S-3-1D PAGE Intensities
1D-PAGE Total intensities of four different MW fractions of proteins in the medium, binding to the NF.
From the image depicted in Figure 12A. Numbers are the average intensities of different MW fractions of triplicate measurements.
This is a relative quantification of all proteins in the gel, without knowledge of their identity. For identification, gel lanes were all excised and in-gel digested for LCMS analysis.
	0-30	30-60	60-70	70-200
FBS	28.21	34.37	15.54	21.88
Un - BSA	38.11	23.56	15.4	22.93
Un + BSA	38.73	25.19	14.61	21.48
Ar - BSA	36.78	23.48	8.34	31.41
Ar + BSA	38.62	22.96	8.13	30.29
N2 - BSA	37.64	22.65	8.89	30.8
N2 + BSA	37.29	23.55	9.3	29.89
He/NH3 - BSA	38.16	23.87	10.77	27.21
He/NH3 + BSA	36.73	25.72	10.4	27.16
1D-PAGE Total intensities of four different MW fractions of proteins binding following cell detachment.
Numbers are the average intensities of different MW fractions of triplicate measurements.
This is a relative quantification of all proteins in the gel, without knowledge of their identity. For identification, gel lanes were all excised and in-gel digested for LCMS analysis.
	0-30 kDa	30-60 kDa	60-70 kDa	70-200 kDa
Un + BSA	42.22	29.56	5.92	22.29
Ar + BSA	41.83	26.86	5.06	26.25
N2 + BSA	43.05	26.32	5.01	25.65
He/NH3 + BSA	43.39	26.94	5.26	24.41

## Sheet: S-4-Protein Data
This is the *.csv PROTEIN export from the Mascot search performed on all runs from the in-gel digests of the protein corona.
The Header displays the search parameters
The Protein hits lists all the identified peptides
To include all FBS proteins, mammalia was chosen as taxonomy. Note that species distinction requires a separate workflow. In case all the peptides of a certain protein can be found in different organisms, only one hit is reported. In general, species can be mapped back to BOVIN alone in this experiment, except for the common contaminating proteins from the CrAP database (https://www.thegpm.org/cr…
Header	--------------------------------------------------------
Search title	Human Proteome
Timestamp	2017-12-13T12:10:02Z
User	MD
Email
Report URI	http://fw01c326.ugent.be/mascot/cgi/master_results.pl?file=../data/20171213/F002744.dat
Peak list data path	C:\ProgramData\Matrix Science\Mascot Daemon\MGF\309 171213 MD MAhtab NoCell Mammelia Merge Search NoCell\mascot_daemon_merge.mgf
Peak list format	Mascot generic
Search type	MIS
Mascot version	2.6.1
Database	SwissProt
Fasta file	SwissProt_2016_11.fasta
Total sequences	553231
Total residues	197953409
Sequences after taxonomy filter	66512
Number of queries	142900
Fixed modifications	--------------------------------------------------------
Identifier	Name	Delta	Neutral loss
1	Methylthio (C)	45.9877
Variable modifications	--------------------------------------------------------
Identifier	Name	Delta	Neutral loss(es)
1	Deamidated (NQ)	0.984016
2	Oxidation (M)	15.9949	0	63.9983
Search Parameters	--------------------------------------------------------
Taxonomy filter	. . . . . . . . . . . . Mammalia (mammals)
Enzyme	Trypsin
Maximum Missed Cleavages	1
Fixed modifications	Methylthio (C)
Variable modifications	Deamidated (NQ),Oxidation (M)
Peptide Mass Tolerance	10
Peptide Mass Tolerance Units	ppm
Fragment Mass Tolerance	0.1
Fragment Mass Tolerance Units	Da
Mass values	Monoisotopic
Instrument type	SynaptG2Si HDDDA
Format parameters	--------------------------------------------------------
Significance threshold	0.01
Max. number of hits	0
Use MudPIT protein scoring	1
Ions score cut-off	-1
Include same-set proteins	0
Include sub-set proteins	1
Include unassigned	0
Require bold red	0
Use homology threshold	1
Group protein families	1
Show duplicate peptides	0
Protein hits	--------------------------------------------------------
prot_hit_num	prot_family_member	prot_acc	prot_desc	prot_score	prot_mass	prot_matches	prot_matches_sig	prot_sequences	prot_sequences_sig
1	1	K2C1_HUMAN	Keratin, type II cytoskeletal 1 OS=Homo sapiens GN=KRT1 PE=1 SV=6	15238	66137	498	498	29	29
1	2	K22E_HUMAN	Keratin, type II cytoskeletal 2 epidermal OS=Homo sapiens GN=KRT2 PE=1 SV=2	6590	65623	244	244	21	21
1	3	K2C6B_HUMAN	Keratin, type II cytoskeletal 6B OS=Homo sapiens GN=KRT6B PE=1 SV=5	1360	60260	54	54	9	9
1	4	K2C6A_HUMAN	Keratin, type II cytoskeletal 6A OS=Homo sapiens GN=KRT6A PE=1 SV=3	1300	60238	51	51	9	9
1	5	K2C5_HUMAN	Keratin, type II cytoskeletal 5 OS=Homo sapiens GN=KRT5 PE=1 SV=3	1087	62524	53	53	11	11
1	6	K2C6A_RAT	Keratin, type II cytoskeletal 6A OS=Rattus norvegicus GN=Krt6a PE=1 SV=1	1059	59489	42	42	5	5
1	7	K2C75_HUMAN	Keratin, type II cytoskeletal 75 OS=Homo sapiens GN=KRT75 PE=1 SV=2	672	59754	29	29	5	5
1	8	K22E_MOUSE	Keratin, type II cytoskeletal 2 epidermal OS=Mus musculus GN=Krt2 PE=1 SV=1	631	71248	45	45	3	3
1	9	K2M2_SHEEP	Keratin, type II microfibrillar, component 7C OS=Ovis aries PE=1 SV=1	59	55119	4	4	3	3
1	10	K2C8_MOUSE	Keratin, type II cytoskeletal 8 OS=Mus musculus GN=Krt8 PE=1 SV=4	56	54531	1	1	1	1
1		K2C1_PANTR	Keratin, type II cytoskeletal 1 OS=Pan troglodytes GN=KRT1 PE=2 SV=1	14690	65588	472	472	25	25
1		K2C1_CANLF	Keratin, type II cytoskeletal 1 OS=Canis lupus familiaris GN=KRT1 PE=2 SV=1	6555	63889	210	210	9	9
1		K2C1_RAT	Keratin, type II cytoskeletal 1 OS=Rattus norvegicus GN=Krt1 PE=2 SV=1	4700	65113	157	157	8	8
1		K2C1_MOUSE	Keratin, type II cytoskeletal 1 OS=Mus musculus GN=Krt1 PE=1 SV=4	3643	65979	107	107	5	5
1		K22E_CANLF	Keratin, type II cytoskeletal 2 epidermal OS=Canis lupus familiaris GN=KRT2 PE=2 SV=1	3419	64757	105	105	6	6
1		K2C73_MOUSE	Keratin, type II cytoskeletal 73 OS=Mus musculus GN=Krt73 PE=1 SV=1	2391	59381	73	73	2	2
1		K2C1B_MOUSE	Keratin, type II cytoskeletal 1b OS=Mus musculus GN=Krt77 PE=1 SV=1	2224	61368	70	70	3	3
1		K2C1B_HUMAN	Keratin, type II cytoskeletal 1b OS=Homo sapiens GN=KRT77 PE=2 SV=3	1762	62093	55	55	2	2
1		K2C71_MOUSE	Keratin, type II cytoskeletal 71 OS=Mus musculus GN=Krt71 PE=1 SV=1	1658	57761	49	49	1	1
1		K2C5_BOVIN	Keratin, type II cytoskeletal 5 OS=Bos taurus GN=KRT5 PE=1 SV=1	1335	63036	57	57	9	9
1		K2C7_BOVIN	Keratin, type II cytoskeletal 7 OS=Bos taurus GN=KRT7 PE=2 SV=1	1280	51592	43	43	2	2
1		K2C5_RAT	Keratin, type II cytoskeletal 5 OS=Rattus norvegicus GN=Krt5 PE=1 SV=1	1255	61926	54	54	9	9
1		K2C5_MOUSE	Keratin, type II cytoskeletal 5 OS=Mus musculus GN=Krt5 PE=1 SV=1	1253	61913	53	53	8	8
1		K2C5_PANTR	Keratin, type II cytoskeletal 5 OS=Pan troglodytes GN=KRT5 PE=2 SV=1	1064	62684	52	52	10	10
1		K2C6A_MOUSE	Keratin, type II cytoskeletal 6A OS=Mus musculus GN=Krt6a PE=1 SV=3	954	59575	35	35	5	5
1		K2C75_BOVIN	Keratin, type II cytoskeletal 75 OS=Bos taurus GN=KRT75 PE=2 SV=1	930	59321	34	34	4	4
1		K2C6B_MOUSE	Keratin, type II cytoskeletal 6B OS=Mus musculus GN=Krt6b PE=1 SV=3	929	60561	34	34	4	4
1		KRT85_MOUSE	Keratin, type II cuticular Hb5 OS=Mus musculus GN=Krt85 PE=1 SV=2	769	57057	25	25	2	2
1		GFAP_BOVIN	Glial fibrillary acidic protein OS=Bos taurus GN=GFAP PE=1 SV=2	760	49527	24	24	1	1
1		K2C79_HUMAN	Keratin, type II cytoskeletal 79 OS=Homo sapiens GN=KRT79 PE=1 SV=2	682	58030	31	31	4	4
1		K2C79_BOVIN	Keratin, type II cytoskeletal 79 OS=Bos taurus GN=KRT79 PE=2 SV=1	672	57961	29	29	4	4
1		K2C3_HUMAN	Keratin, type II cytoskeletal 3 OS=Homo sapiens GN=KRT3 PE=1 SV=3	461	64516	19	19	4	4
1		K22E_RAT	Keratin, type II cytoskeletal 2 epidermal OS=Rattus norvegicus GN=Krt2 PE=3 SV=1	438	69407	19	19	4	4
1		K22O_HUMAN	Keratin, type II cytoskeletal 2 oral OS=Homo sapiens GN=KRT76 PE=1 SV=2	437	66260	18	18	3	3
1		K2C4_RAT	Keratin, type II cytoskeletal 4 OS=Rattus norvegicus GN=Krt4 PE=3 SV=1	418	57907	16	16	3	3
1		K22O_MOUSE	Keratin, type II cytoskeletal 2 oral OS=Mus musculus GN=Krt76 PE=1 SV=1	399	63220	14	14	2	2
1		K2C79_MOUSE	Keratin, type II cytoskeletal 79 OS=Mus musculus GN=Krt79 PE=1 SV=2	277	57747	13	13	1	1
1		K2C73_HUMAN	Keratin, type II cytoskeletal 73 OS=Homo sapiens GN=KRT73 PE=1 SV=1	70	59347	4	4	2	2
1		K2M3_SHEEP	Keratin, type II microfibrillar, component 5 OS=Ovis aries PE=1 SV=1	47	56186	3	3	2	2
1		K2M1_SHEEP	Keratin, type II microfibrillar (Fragment) OS=Ovis aries PE=1 SV=1	36	12859	1	1	1	1
2	1	ALBU_BOVIN	Serum albumin OS=Bos taurus GN=ALB PE=1 SV=4	14486	70858	465	465	27	27
2	2	ALBU_CANLF	Serum albumin OS=Canis lupus familiaris GN=ALB PE=1 SV=3	3117	70170	82	82	3	3
2	3	ALBU_PIG	Serum albumin OS=Sus scrofa GN=ALB PE=1 SV=2	3106	71257	80	80	3	3
2		ALBU_FELCA	Serum albumin OS=Felis catus GN=ALB PE=1 SV=1	6262	70225	154	154	3	3
2		ALBU_SHEEP	Serum albumin OS=Ovis aries GN=ALB PE=1 SV=1	5327	70753	202	202	10	10
2		ALBU_MACFA	Serum albumin OS=Macaca fascicularis GN=ALB PE=2 SV=1	3280	70439	83	83	4	4
2		ALBU_HUMAN	Serum albumin OS=Homo sapiens GN=ALB PE=1 SV=2	3229	70931	79	79	3	3
2		ALBU_MESAU	Serum albumin OS=Mesocricetus auratus GN=ALB PE=1 SV=1	3111	69790	80	80	2	2
2		ALBU_MOUSE	Serum albumin OS=Mus musculus GN=Alb PE=1 SV=3	3062	70303	76	76	1	1
2		ALBU_CAPHI	Serum albumin (Fragments) OS=Capra hircus GN=ALB PE=1 SV=2	1151	10048	55	55	3	3
2		ALBU_RAT	Serum albumin OS=Rattus norvegicus GN=Alb PE=1 SV=2	82	70296	4	4	1	1
2		ALBU_EQUAS	Serum albumin OS=Equus asinus GN=ALB PE=1 SV=1	32	70104	1	1	1	1
3	1	CO3_BOVIN	Complement C3 OS=Bos taurus GN=C3 PE=1 SV=2	13968	188377	555	555	55	55
3	2	CO3_RAT	Complement C3 OS=Rattus norvegicus GN=C3 PE=1 SV=3	1329	187538	70	70	7	7
3		CO3_PIG	Complement C3 OS=Sus scrofa GN=C3 PE=1 SV=2	3134	187931	121	121	12	12
3		CO3_MOUSE	Complement C3 OS=Mus musculus GN=C3 PE=1 SV=3	929	187607	51	51	5	5
3		CO3_HUMAN	Complement C3 OS=Homo sapiens GN=C3 PE=1 SV=2	710	188272	32	32	4	4
3		CO3_RABIT	Complement C3 alpha chain (Fragment) OS=Oryctolagus cuniculus GN=C3 PE=2 SV=1	684	82528	22	22	2	2
3		CO3_CAVPO	Complement C3 OS=Cavia porcellus GN=C3 PE=1 SV=2	599	187612	34	34	5	5
4	1	K1C10_HUMAN	Keratin, type I cytoskeletal 10 OS=Homo sapiens GN=KRT10 PE=1 SV=6	10564	58976	267	267	20	20
4	2	K1C14_HUMAN	Keratin, type I cytoskeletal 14 OS=Homo sapiens GN=KRT14 PE=1 SV=4	3608	51805	114	114	14	14
4	3	K1C16_HUMAN	Keratin, type I cytoskeletal 16 OS=Homo sapiens GN=KRT16 PE=1 SV=4	1145	51512	56	56	8	8
4		K1C10_CANLF	Keratin, type I cytoskeletal 10 OS=Canis lupus familiaris GN=KRT10 PE=2 SV=1	5359	57814	133	133	11	11
4		K1C10_BOVIN	Keratin, type I cytoskeletal 10 OS=Bos taurus GN=KRT10 PE=3 SV=1	2573	54953	84	84	7	7
4		K1C10_RAT	Keratin, type I cytoskeletal 10 OS=Rattus norvegicus GN=Krt10 PE=3 SV=1	1819	56654	73	73	7	7
4		K1C10_MOUSE	Keratin, type I cytoskeletal 10 OS=Mus musculus GN=Krt10 PE=1 SV=3	1789	57873	53	53	5	5
4		K1C14_MOUSE	Keratin, type I cytoskeletal 14 OS=Mus musculus GN=Krt14 PE=1 SV=2	1601	53110	49	49	7	7
4		K1C17_BOVIN	Keratin, type I cytoskeletal 17 OS=Bos taurus GN=KRT17 PE=2 SV=1	1574	48912	47	47	5	5
4		K1C17_MOUSE	Keratin, type I cytoskeletal 17 OS=Mus musculus GN=Krt17 PE=1 SV=3	1571	48362	49	49	6	6
4		K1C14_RAT	Keratin, type I cytoskeletal 14 OS=Rattus norvegicus GN=Krt14 PE=2 SV=1	1561	52881	45	45	5	5
4		K1C13_HUMAN	Keratin, type I cytoskeletal 13 OS=Homo sapiens GN=KRT13 PE=1 SV=4	1069	49833	58	58	5	5
4		K1C42_MOUSE	Keratin, type I cytoskeletal 42 OS=Mus musculus GN=Krt42 PE=1 SV=1	910	50378	51	51	7	7
4		K1C15_HUMAN	Keratin, type I cytoskeletal 15 OS=Homo sapiens GN=KRT15 PE=1 SV=3	835	49365	43	43	5	5
4		K1C15_SHEEP	Keratin, type I cytoskeletal 15 OS=Ovis aries GN=KRT15 PE=2 SV=1	814	48740	45	45	4	4
4		K1C13_MOUSE	Keratin, type I cytoskeletal 13 OS=Mus musculus GN=Krt13 PE=1 SV=2	723	48000	42	42	5	5
4		K1C13_RAT	Keratin, type I cytoskeletal 13 OS=Rattus norvegicus GN=Krt13 PE=3 SV=1	670	48021	39	39	4	4
4		K1C42_RAT	Keratin, type I cytoskeletal 42 OS=Rattus norvegicus GN=Krt42 PE=3 SV=1	510	50458	32	32	6	6
4		K1C14_BOVIN	Keratin, type I cytoskeletal 14 (Fragment) OS=Bos taurus GN=KRT14 PE=2 SV=1	507	10761	26	26	3	3
4		K1C19_POTTR	Keratin, type I cytoskeletal 19 OS=Potorous tridactylus GN=KRT19 PE=2 SV=1	484	43849	22	22	2	2
4		K1C17_PANTR	Keratin, type I cytoskeletal 17 OS=Pan troglodytes GN=KRT17 PE=2 SV=1	454	48321	25	25	4	4
4		K1C15_MOUSE	Keratin, type I cytoskeletal 15 OS=Mus musculus GN=Krt15 PE=1 SV=2	410	49245	23	23	3	3
4		K1C19_BOVIN	Keratin, type I cytoskeletal 19 OS=Bos taurus GN=KRT19 PE=2 SV=1	397	43858	24	24	4	4
4		K1C16_MOUSE	Keratin, type I cytoskeletal 16 OS=Mus musculus GN=Krt16 PE=1 SV=3	393	51896	24	24	3	3
4		K1C20_HUMAN	Keratin, type I cytoskeletal 20 OS=Homo sapiens GN=KRT20 PE=1 SV=1	356	48503	20	20	2	2
4		K1C19_RAT	Keratin, type I cytoskeletal 19 OS=Rattus norvegicus GN=Krt19 PE=1 SV=2	323	44609	24	24	5	5
4		K1C19_MESAU	Keratin, type I cytoskeletal 19 (Fragments) OS=Mesocricetus auratus GN=KRT19 PE=1 SV=1	284	12966	20	20	3	3
4		K1C19_HUMAN	Keratin, type I cytoskeletal 19 OS=Homo sapiens GN=KRT19 PE=1 SV=4	123	44079	8	8	4	4
4		K1C24_HUMAN	Keratin, type I cytoskeletal 24 OS=Homo sapiens GN=KRT24 PE=1 SV=1	94	55467	6	6	1	1
4		K1C12_HUMAN	Keratin, type I cytoskeletal 12 OS=Homo sapiens GN=KRT12 PE=1 SV=1	83	53570	3	3	1	1
4		K1C20_BOVIN	Keratin, type I cytoskeletal 20 OS=Bos taurus GN=KRT20 PE=2 SV=2	28	48235	1	1	1	1
5	1	APOA1_BOVIN	Apolipoprotein A-I OS=Bos taurus GN=APOA1 PE=1 SV=3	7328	30258	273	273	22	22
5	2	APOA1_AILME	Apolipoprotein A-I OS=Ailuropoda melanoleuca GN=APOA1 PE=2 SV=1	1464	30190	44	44	4	4
5	3	APOA1_GORGO	Apolipoprotein A-I OS=Gorilla gorilla gorilla GN=APOA1 PE=1 SV=1	330	30759	10	10	3	3
5		APOA1_PANHO	Apolipoprotein A-I OS=Pantholops hodgsonii GN=APOA1 PE=2 SV=1	6184	29923	209	209	14	14
5		APOA1_TURTR	Apolipoprotein A-I OS=Tursiops truncatus GN=APOA1 PE=2 SV=1	3952	30356	139	139	10	10
5		APOA1_PHYCD	Apolipoprotein A-I OS=Physeter catodon GN=APOA1 PE=2 SV=1	3658	30416	112	112	9	9
5		APOA1_PIG	Apolipoprotein A-I OS=Sus scrofa GN=APOA1 PE=1 SV=4	2956	30307	86	86	6	6
5		APOA1_MUSPF	Apolipoprotein A-I OS=Mustela putorius furo GN=APOA1 PE=3 SV=2	2026	30161	80	80	6	6
5		APOA1_CANLF	Apolipoprotein A-I OS=Canis lupus familiaris GN=APOA1 PE=1 SV=2	1924	30178	52	52	3	3
5		APOA1_ODORO	Apolipoprotein A-I OS=Odobenus rosmarus divergens GN=APOA1 PE=3 SV=1	1327	30197	35	35	3	3
5		APOA1_BALAS	Apolipoprotein A-I OS=Balaenoptera acutorostrata scammoni GN=APOA1 PE=2 SV=1	1027	30495	49	49	4	4
5		APOA1_TARSY	Apolipoprotein A-I OS=Tarsius syrichta GN=APOA1 PE=2 SV=1	583	30413	35	35	3	3
5		APOA1_PANTA	Apolipoprotein A-I (Fragment) OS=Panthera tigris altaica GN=APOA1 PE=2 SV=1	391	17602	24	24	2	2
5		APOA1_MOUSE	Apolipoprotein A-I OS=Mus musculus GN=Apoa1 PE=1 SV=2	337	30597	28	28	2	2
5		APOA1_LEPWE	Apolipoprotein A-I OS=Leptonychotes weddellii GN=APOA1 PE=3 SV=1	323	30293	13	13	4	4
5		APOA1_MACFA	Apolipoprotein A-I OS=Macaca fascicularis GN=APOA1 PE=1 SV=1	316	30716	9	9	2	2
5		APOA1_CAVPO	Apolipoprotein A-I OS=Cavia porcellus GN=APOA1 PE=3 SV=2	120	30270	14	14	2	2
5		APOA1_CHILA	Apolipoprotein A-I OS=Chinchilla lanigera GN=APOA1 PE=3 SV=1	32	30611	1	1	1	1
6	1	K1C9_HUMAN	Keratin, type I cytoskeletal 9 OS=Homo sapiens GN=KRT9 PE=1 SV=3	7181	62211	216	216	19	19
7	1	HBA_BOVIN	Hemoglobin subunit alpha OS=Bos taurus GN=HBA PE=1 SV=2	5026	15175	125	125	9	9
7	2	HBA3_PANTR	Hemoglobin subunit alpha-3 OS=Pan troglodytes PE=1 SV=1	1343	15273	62	62	6	6
7	3	HBA_BOSGF	Hemoglobin subunit alpha OS=Bos gaurus frontalis GN=HBA PE=1 SV=2	1335	15188	39	39	5	5
7	4	HBA_MICPE	Hemoglobin subunit alpha OS=Microtus pennsylvanicus PE=1 SV=1	508	15110	41	41	4	4
7	5	HBA_TAPTE	Hemoglobin subunit alpha-1/2 OS=Tapirus terrestris PE=1 SV=1	33	15327	2	2	2	2
7		HBA1_BOSMU	Hemoglobin subunit alpha-1 OS=Bos mutus grunniens PE=1 SV=1	4147	15035	101	101	8	8
7		HBA2_BOSMU	Hemoglobin subunit alpha-2 OS=Bos mutus grunniens PE=1 SV=1	2893	14972	82	82	6	6
7		HBA_BISBO	Hemoglobin subunit alpha-I/II OS=Bison bonasus PE=1 SV=2	2766	15130	70	70	5	5
7		HBA_TALEU	Hemoglobin subunit alpha OS=Talpa europaea GN=HBA PE=1 SV=1	1291	15271	59	59	3	3
7		HBA_ODOVI	Hemoglobin subunit alpha-1/2 OS=Odocoileus virginianus virginianus PE=1 SV=1	1279	15116	35	35	5	5
7		HBA_LAMGL	Hemoglobin subunit alpha OS=Lama glama GN=HBA PE=1 SV=1	1239	15141	38	38	4	4
7		HBA_SPECI	Hemoglobin subunit alpha OS=Spermophilus citellus GN=HBA PE=1 SV=1	1012	15275	39	39	4	4
7		HBA_CRIGA	Hemoglobin subunit alpha OS=Cricetomys gambianus GN=HBA PE=1 SV=2	1008	15216	38	38	3	3
7		HBA3_BUBBU	Hemoglobin subunit alpha-3 OS=Bubalus bubalis PE=2 SV=3	919	15180	26	26	3	3
7		HBA_TRIIN	Hemoglobin subunit alpha OS=Trichechus inunguis GN=HBA PE=1 SV=1	599	15683	23	23	3	3
7		HBA_MESAU	Hemoglobin subunit alpha OS=Mesocricetus auratus GN=HBA PE=1 SV=1	414	15285	35	35	2	2
7		HBA_HIPAM	Hemoglobin subunit alpha OS=Hippopotamus amphibius GN=HBA PE=1 SV=1	331	15287	10	10	3	3
7		HBA_PIG	Hemoglobin subunit alpha OS=Sus scrofa GN=HBA PE=1 SV=1	327	15076	9	9	2	2
7		HBA_TUPGL	Hemoglobin subunit alpha OS=Tupaia glis GN=HBA PE=1 SV=1	326	15312	9	9	2	2
7		HBA_BALAC	Hemoglobin subunit alpha OS=Balaenoptera acutorostrata GN=HBA PE=1 SV=2	125	15574	6	6	2	2
7		HBA1_OTOCR	Hemoglobin subunit alpha-A OS=Otolemur crassicaudatus GN=HBAA PE=2 SV=2	24	15414	1	1	1	1
8	1	A1AT_BOVIN	Alpha-1-antiproteinase OS=Bos taurus GN=SERPINA1 PE=1 SV=1	4791	46351	181	181	13	13
8		A1AT_SHEEP	Alpha-1-antiproteinase OS=Ovis aries PE=1 SV=1	1598	46232	77	77	7	7
8		A1AT_PIG	Alpha-1-antitrypsin OS=Sus scrofa GN=SERPINA1 PE=2 SV=1	564	47394	26	26	1	1
9	1	FETUA_BOVIN	Alpha-2-HS-glycoprotein OS=Bos taurus GN=AHSG PE=1 SV=2	4067	39038	121	121	7	7
9		FETUA_SHEEP	Alpha-2-HS-glycoprotein OS=Ovis aries GN=AHSG PE=1 SV=1	402	39345	16	16	3	3
10	1	HBBF_BOVIN	Hemoglobin fetal subunit beta OS=Bos taurus PE=1 SV=1	3384	15941	107	107	12	12
10	2	HBB_BISBO	Hemoglobin subunit beta OS=Bison bonasus GN=HBB PE=1 SV=1	875	16012	27	27	5	5
10	3	HBD_ATEGE	Hemoglobin subunit delta OS=Ateles geoffroyi GN=HBD PE=1 SV=3	382	16015	35	35	3	3
10	4	HBB_HIPAM	Hemoglobin subunit beta OS=Hippopotamus amphibius GN=HBB PE=1 SV=1	102	16101	17	17	2	2
10		HBB_ALCAA	Hemoglobin subunit beta OS=Alces alces alces GN=HBB PE=1 SV=1	1219	16258	44	44	6	6
10		HBB_TRAST	Hemoglobin subunit beta OS=Tragelaphus strepsiceros GN=HBB PE=1 SV=1	1214	16089	41	41	5	5
10		HBBF_CAPHI	Hemoglobin fetal subunit beta OS=Capra hircus PE=1 SV=1	869	15982	29	29	5	5
10		HBB_CYNSP	Hemoglobin subunit beta OS=Cynopterus sphinx GN=HBB PE=1 SV=1	784	15963	31	31	4	4
10		HBB_BOSMU	Hemoglobin subunit beta OS=Bos mutus grunniens GN=HBB PE=1 SV=1	779	16027	28	28	3	3
10		HBB_CAMBA	Hemoglobin subunit beta OS=Camelus bactrianus GN=HBB PE=1 SV=2	764	16281	29	29	3	3
10		HBBA_BOSJA	Hemoglobin subunit beta-A OS=Bos javanicus PE=1 SV=1	438	16000	14	14	3	3
10		HBB1_CHAMP	Hemoglobin subunit beta-1 OS=Chalinolobus morio GN=HBB1 PE=1 SV=2	431	16000	16	16	3	3
10		HBBA_CAPHI	Hemoglobin subunit beta-A OS=Capra hircus PE=1 SV=1	426	16057	13	13	2	2
10		HBB_PTEAL	Hemoglobin subunit beta OS=Pteropus alecto GN=HBB PE=1 SV=1	405	16019	20	20	3	3
10		HBB_CHETO	Hemoglobin subunit beta OS=Cheracebus torquatus GN=HBB PE=2 SV=3	105	16138	12	12	3	3
10		HBB_EULFU	Hemoglobin subunit beta OS=Eulemur fulvus fulvus GN=HBB PE=1 SV=2	59	15937	4	4	2	2
10		HBB_ECHTE	Hemoglobin subunit beta OS=Echinops telfairi GN=HBB PE=1 SV=1	27	16262	3	3	1	1
11	1	CO4_BOVIN	Complement C4 (Fragments) OS=Bos taurus GN=C4 PE=1 SV=2	2612	102786	108	108	12	12
11	2	CO4A_HUMAN	Complement C4-A OS=Homo sapiens GN=C4A PE=1 SV=2	1853	193952	61	61	5	5
11		CO4_RAT	Complement C4 OS=Rattus norvegicus GN=C4 PE=1 SV=3	71	193330	1	1	1	1
12	1	GELS_BOVIN	Gelsolin OS=Bos taurus GN=GSN PE=2 SV=1	2382	80910	98	98	12	12
12	2	GELS_HUMAN	Gelsolin OS=Homo sapiens GN=GSN PE=1 SV=1	1934	85966	76	76	7	7
12	3	GELS_PIG	Gelsolin (Fragment) OS=Sus scrofa GN=GSN PE=1 SV=1	1516	84999	63	63	6	6
12		GELS_HORSE	Gelsolin OS=Equus caballus GN=GSN PE=1 SV=2	2006	81007	73	73	5	5
12		GELS_RAT	Gelsolin OS=Rattus norvegicus GN=Gsn PE=1 SV=1	1393	86336	59	59	7	7
12		GELS_MOUSE	Gelsolin OS=Mus musculus GN=Gsn PE=1 SV=3	1009	86210	38	38	5	5
13	1	CFAH_BOVIN	Complement factor H OS=Bos taurus GN=CFH PE=1 SV=3	2017	144053	84	84	9	9
14	1	A2MG_BOVIN	Alpha-2-macroglobulin OS=Bos taurus GN=A2M PE=1 SV=2	1902	168666	70	70	12	12
14		A2MG_HUMAN	Alpha-2-macroglobulin OS=Homo sapiens GN=A2M PE=1 SV=3	32	164338	1	1	1	1
15	1	TRYP_PIG	Trypsin OS=Sus scrofa PE=1 SV=1	1769	24946	71	71	3	3
15		TRY1_RAT	Anionic trypsin-1 OS=Rattus norvegicus GN=Prss1 PE=1 SV=1	272	26495	18	18	1	1
16	1	ITIH4_BOVIN	Inter-alpha-trypsin inhibitor heavy chain H4 OS=Bos taurus GN=ITIH4 PE=1 SV=1	1547	101587	55	55	9	9
16		ITIH4_PIG	Inter-alpha-trypsin inhibitor heavy chain H4 OS=Sus scrofa GN=ITIH4 PE=1 SV=1	177	102221	8	8	1	1
17	1	APOE_BOSMU	Apolipoprotein E OS=Bos mutus grunniens GN=APOE PE=3 SV=1	1526	36049	45	45	6	6
17	2	APOE_ATEGE	Apolipoprotein E OS=Ateles geoffroyi GN=APOE PE=3 SV=1	155	36733	6	6	2	2
17		APOE_OVIMU	Apolipoprotein E OS=Ovis aries musimon GN=APOE PE=3 SV=1	1011	36223	27	27	3	3
17		APOE_CAPHE	Apolipoprotein E OS=Capra hircus aegagrus GN=APOE PE=3 SV=1	938	36107	23	23	2	2
17		APOE_CHLSB	Apolipoprotein E OS=Chlorocebus sabaeus GN=APOE PE=3 SV=1	392	36044	13	13	2	2
17		APOE_MACMU	Apolipoprotein E (Fragment) OS=Macaca mulatta GN=APOE PE=2 SV=1	322	12375	9	9	1	1
17		APOE_TURTR	Apolipoprotein E OS=Tursiops truncatus GN=APOE PE=3 SV=1	140	36317	8	8	2	2
18	1	IPSP_BOVIN	Plasma serine protease inhibitor OS=Bos taurus GN=SERPINA5 PE=1 SV=1	1512	45406	59	59	7	7
19	1	PLMN_BOVIN	Plasminogen OS=Bos taurus GN=PLG PE=1 SV=2	1320	93364	94	94	13	13
19		PLMN_HUMAN	Plasminogen OS=Homo sapiens GN=PLG PE=1 SV=2	81	92718	3	3	1	1
19		PLMN_PIG	Plasminogen OS=Sus scrofa GN=PLG PE=1 SV=3	48	92764	2	2	2	2
19		PLMN_CAPHI	Plasminogen (Fragment) OS=Capra hircus GN=PLG PE=1 SV=1	39	14267	1	1	1	1
19		PLMN_MACMU	Plasminogen OS=Macaca mulatta GN=PLG PE=2 SV=1	23	92404	1	1	1	1
20	1	TTHY_BOVIN	Transthyretin OS=Bos taurus GN=TTR PE=1 SV=1	1099	15809	34	34	5	5
20		TTHY_SHEEP	Transthyretin OS=Ovis aries GN=TTR PE=2 SV=1	742	15853	22	22	2	2
20		TTHY_PIG	Transthyretin OS=Sus scrofa GN=TTR PE=1 SV=1	564	16163	12	12	1	1
20		TTHY_ERIEU	Transthyretin OS=Erinaceus europaeus GN=TTR PE=2 SV=1	231	15926	11	11	2	2
21	1	F12AI_BOVIN	Factor XIIa inhibitor OS=Bos taurus PE=1 SV=1	1043	51875	33	33	6	6
22	1	CO9_BOVIN	Complement component C9 OS=Bos taurus GN=C9 PE=2 SV=1	982	63062	33	33	8	8
22		CO9_HORSE	Complement component C9 OS=Equus caballus GN=C9 PE=2 SV=1	563	63124	14	14	1	1
23	1	ITIH2_HUMAN	Inter-alpha-trypsin inhibitor heavy chain H2 OS=Homo sapiens GN=ITIH2 PE=1 SV=2	930	106765	41	41	3	3
23		ITIH2_MESAU	Inter-alpha-trypsin inhibitor heavy chain H2 OS=Mesocricetus auratus GN=ITIH2 PE=1 SV=1	868	106836	35	35	2	2
24	1	TSP4_BOVIN	Thrombospondin-4 OS=Bos taurus GN=THBS4 PE=2 SV=1	866	108068	28	28	3	3
24		TSP4_MOUSE	Thrombospondin-4 OS=Mus musculus GN=Thbs4 PE=1 SV=1	47	108460	1	1	1	1
25	1	VTDB_BOVIN	Vitamin D-binding protein OS=Bos taurus GN=GC PE=2 SV=1	842	54595	22	22	2	2
26	1	TRFE_BOVIN	Serotransferrin OS=Bos taurus GN=TF PE=2 SV=1	785	79450	42	42	8	8
26		TRFE_PIG	Serotransferrin OS=Sus scrofa GN=TF PE=1 SV=2	423	78574	14	14	2	2
27	1	POSTN_HUMAN	Periostin OS=Homo sapiens GN=POSTN PE=1 SV=2	733	93761	39	39	9	9
27		POSTN_MOUSE	Periostin OS=Mus musculus GN=Postn PE=1 SV=2	565	93637	26	26	5	5
28	1	PEDF_BOVIN	Pigment epithelium-derived factor OS=Bos taurus GN=SERPINF1 PE=1 SV=1	690	46292	25	25	6	6
28		PEDF_HUMAN	Pigment epithelium-derived factor OS=Homo sapiens GN=SERPINF1 PE=1 SV=4	349	46421	12	12	4	4
28		PEDF_MOUSE	Pigment epithelium-derived factor OS=Mus musculus GN=Serpinf1 PE=1 SV=2	257	46251	7	7	1	1
29	1	A1AG_BOVIN	Alpha-1-acid glycoprotein OS=Bos taurus GN=ORM1 PE=2 SV=1	672	23398	19	19	1	1
30	1	ANGT_SHEEP	Angiotensinogen OS=Ovis aries GN=AGT PE=1 SV=2	672	51410	23	23	3	3
31	1	CERU_SHEEP	Ceruloplasmin OS=Ovis aries GN=CP PE=2 SV=1	632	119832	24	24	8	8
31	2	CERU_HUMAN	Ceruloplasmin OS=Homo sapiens GN=CP PE=1 SV=1	50	122817	3	3	2	2
31		CERU_MOUSE	Ceruloplasmin OS=Mus musculus GN=Cp PE=1 SV=2	47	121718	1	1	1	1
32	1	PGRP1_BOSIN	Peptidoglycan recognition protein 1 OS=Bos indicus GN=PGLYRP1 PE=3 SV=1	582	21300	28	28	4	4
33	1	CFAB_BOVIN	Complement factor B OS=Bos taurus GN=CFB PE=1 SV=2	544	86462	25	25	5	5
34	1	MGP_BOVIN	Matrix Gla protein OS=Bos taurus GN=MGP PE=1 SV=1	507	12347	17	17	2	2
34		MGP_HUMAN	Matrix Gla protein OS=Homo sapiens GN=MGP PE=1 SV=2	492	12483	16	16	1	1
35	1	ACTB_BOVIN	Actin, cytoplasmic 1 OS=Bos taurus GN=ACTB PE=1 SV=1	488	41986	28	28	5	5
35		ACTB_BOSMU	Actin, cytoplasmic 1 OS=Bos mutus grunniens GN=ACTB PE=2 SV=1	461	41998	26	26	4	4
35		ACTA_BOVIN	Actin, aortic smooth muscle OS=Bos taurus GN=ACTA2 PE=1 SV=1	407	42304	20	20	3	3
35		POTEE_HUMAN	POTE ankyrin domain family member E OS=Homo sapiens GN=POTEE PE=2 SV=3	356	122573	16	16	2	2
35		POTEI_HUMAN	POTE ankyrin domain family member I OS=Homo sapiens GN=POTEI PE=3 SV=1	233	122538	10	10	1	1
35		ACTBL_MOUSE	Beta-actin-like protein 2 OS=Mus musculus GN=Actbl2 PE=1 SV=1	228	42253	14	14	3	3
35		ACTBL_HUMAN	Beta-actin-like protein 2 OS=Homo sapiens GN=ACTBL2 PE=1 SV=2	174	42252	8	8	2	2
35		ACTBM_HUMAN	Putative beta-actin-like protein 3 OS=Homo sapiens GN=POTEKP PE=5 SV=1	147	42265	6	6	1	1
36	1	SAMP_BOVIN	Serum amyloid P-component OS=Bos taurus GN=APCS PE=2 SV=1	463	25259	15	15	4	4
36		SAMP_PIG	Serum amyloid P-component OS=Sus scrofa GN=APCS PE=2 SV=1	234	25717	3	3	1	1
37	1	HGFL_BOVIN	Hepatocyte growth factor-like protein OS=Bos taurus GN=MST1 PE=2 SV=1	433	81760	16	16	3	3
37		HGFL_HUMAN	Hepatocyte growth factor-like protein OS=Homo sapiens GN=MST1 PE=1 SV=2	110	82337	3	3	1	1
38	1	QSOX1_HUMAN	Sulfhydryl oxidase 1 OS=Homo sapiens GN=QSOX1 PE=1 SV=3	406	83169	19	19	4	4
38		QSOX1_CAVPO	Sulfhydryl oxidase 1 OS=Cavia porcellus GN=QSOX1 PE=2 SV=2	281	69150	12	12	2	2
38		QSOX1_MOUSE	Sulfhydryl oxidase 1 OS=Mus musculus GN=Qsox1 PE=1 SV=1	33	83377	1	1	1	1
39	1	VIME_CHLAE	Vimentin OS=Chlorocebus aethiops GN=VIM PE=1 SV=3	386	53722	14	14	4	4
39		VIME_BOVIN	Vimentin OS=Bos taurus GN=VIM PE=1 SV=3	280	53741	11	11	3	3
39		VIME_MOUSE	Vimentin OS=Mus musculus GN=Vim PE=1 SV=3	74	53701	2	2	2	2
39		PERI_BOVIN	Peripherin OS=Bos taurus GN=PRPH PE=2 SV=1	32	53690	1	1	1	1
40	1	APOA2_BOVIN	Apolipoprotein A-II OS=Bos taurus GN=APOA2 PE=1 SV=2	374	11241	18	18	3	3
41	1	CYTC_BOVIN	Cystatin-C OS=Bos taurus GN=CST3 PE=1 SV=2	342	16438	9	9	1	1
42	1	ITIH3_BOVIN	Inter-alpha-trypsin inhibitor heavy chain H3 OS=Bos taurus GN=ITIH3 PE=1 SV=2	298	99719	14	14	6	6
42		ITIH3_RABIT	Inter-alpha-trypsin inhibitor heavy chain H3 OS=Oryctolagus cuniculus GN=ITIH3 PE=2 SV=1	66	100921	1	1	1	1
43	1	FBLN1_HUMAN	Fibulin-1 OS=Homo sapiens GN=FBLN1 PE=1 SV=4	294	80473	18	18	5	5
43		FBLN1_MOUSE	Fibulin-1 OS=Mus musculus GN=Fbln1 PE=1 SV=2	101	81292	10	10	2	2
44	1	TSP1_BOVIN	Thrombospondin-1 OS=Bos taurus GN=THBS1 PE=2 SV=2	272	132670	8	8	4	4
45	1	A1BG_BOVIN	Alpha-1B-glycoprotein OS=Bos taurus GN=A1BG PE=1 SV=1	247	53980	9	9	3	3
46	1	FINC_BOVIN	Fibronectin OS=Bos taurus GN=FN1 PE=1 SV=4	243	274835	17	17	5	5
46		FINC_RAT	Fibronectin OS=Rattus norvegicus GN=Fn1 PE=1 SV=2	202	275284	15	15	4	4
46		FINC_CANLF	Fibronectin (Fragment) OS=Canis lupus familiaris GN=FN1 PE=2 SV=2	168	58125	8	8	3	3
46		FINC_MOUSE	Fibronectin OS=Mus musculus GN=Fn1 PE=1 SV=4	143	275311	11	11	2	2
46		FINC_HUMAN	Fibronectin OS=Homo sapiens GN=FN1 PE=1 SV=4	140	265357	8	8	3	3
46		FINC_HORSE	Fibronectin (Fragment) OS=Equus caballus GN=FN1 PE=2 SV=2	121	58002	6	6	2	2
47	1	FETUB_BOVIN	Fetuin-B OS=Bos taurus GN=FETUB PE=1 SV=1	227	43280	9	9	1	1
48	1	APOC3_BOVIN	Apolipoprotein C-III OS=Bos taurus GN=APOC3 PE=1 SV=2	195	10685	2	2	1	1
49	1	QPCT_BOVIN	Glutaminyl-peptide cyclotransferase OS=Bos taurus GN=QPCT PE=1 SV=1	157	41336	14	14	3	3
49		QPCT_HUMAN	Glutaminyl-peptide cyclotransferase OS=Homo sapiens GN=QPCT PE=1 SV=1	119	40943	7	7	1	1
50	1	PLTP_HUMAN	Phospholipid transfer protein OS=Homo sapiens GN=PLTP PE=1 SV=1	149	54888	3	3	1	1
51	1	VTNC_HUMAN	Vitronectin OS=Homo sapiens GN=VTN PE=1 SV=1	141	54915	6	6	1	1
52	1	IGKC_HUMAN	Ig kappa chain C region OS=Homo sapiens GN=IGKC PE=1 SV=1	140	11740	2	2	2	2
53	1	FETA_BOVIN	Alpha-fetoprotein OS=Bos taurus GN=AFP PE=2 SV=1	136	70015	5	5	1	1
54	1	APOD_BOVIN	Apolipoprotein D OS=Bos taurus GN=APOD PE=2 SV=1	127	21572	5	5	1	1
55	1	ANT3_BOVIN	Antithrombin-III OS=Bos taurus GN=SERPINC1 PE=1 SV=2	116	52728	11	11	5	5
55		ANT3_SHEEP	Antithrombin-III OS=Ovis aries GN=SERPINC1 PE=2 SV=1	65	52880	6	6	4	4
55		ANT3_MOUSE	Antithrombin-III OS=Mus musculus GN=Serpinc1 PE=1 SV=1	49	52384	4	4	2	2
55		ANT3_HUMAN	Antithrombin-III OS=Homo sapiens GN=SERPINC1 PE=1 SV=1	37	52937	1	1	1	1
56	1	H4_BOVIN	Histone H4 OS=Bos taurus PE=1 SV=2	113	11360	7	7	2	2
57	1	HMCN2_MOUSE	Hemicentin-2 OS=Mus musculus GN=Hmcn2 PE=1 SV=1	111	553063	15	15	1	1
58	1	IGHG1_HUMAN	Ig gamma-1 chain C region OS=Homo sapiens GN=IGHG1 PE=1 SV=1	109	36497	3	3	3	3
58		IGHG3_HUMAN	Ig gamma-3 chain C region OS=Homo sapiens GN=IGHG3 PE=1 SV=2	42	42088	1	1	1	1
59	1	TRY3_HUMAN	Trypsin-3 OS=Homo sapiens GN=PRSS3 PE=1 SV=2	106	33152	2	2	1	1
60	1	CTHL4_BOVIN	Cathelicidin-4 OS=Bos taurus GN=CATHL4 PE=1 SV=1	106	16652	2	2	1	1
61	1	CLUS_BOVIN	Clusterin OS=Bos taurus GN=CLU PE=1 SV=1	105	51541	6	6	3	3
61		CLUS_CANLF	Clusterin OS=Canis lupus familiaris GN=CLU PE=2 SV=1	71	52216	2	2	1	1
61		CLUS_PIG	Clusterin OS=Sus scrofa GN=CLU PE=1 SV=1	54	52201	3	3	1	1
62	1	TETN_BOVIN	Tetranectin OS=Bos taurus GN=CLEC3B PE=2 SV=1	101	22498	4	4	2	2
62		TETN_HUMAN	Tetranectin OS=Homo sapiens GN=CLEC3B PE=1 SV=3	52	22844	1	1	1	1
63	1	CHAD_HUMAN	Chondroadherin OS=Homo sapiens GN=CHAD PE=2 SV=2	99	40864	5	5	2	2
63		CHAD_BOVIN	Chondroadherin OS=Bos taurus GN=CHAD PE=1 SV=1	64	41273	1	1	1	1
63		CHAD_MOUSE	Chondroadherin OS=Mus musculus GN=Chad PE=2 SV=1	60	40737	4	4	1	1
64	1	ZP3R_CAVPO	Zona pellucida sperm-binding protein 3 receptor OS=Cavia porcellus GN=ZP3R PE=1 SV=1	94	61205	2	2	1	1
65	1	PLMN_CANLF	Plasminogen (Fragment) OS=Canis lupus familiaris GN=PLG PE=1 SV=1	88	37482	6	6	1	1
66	1	LBP_BOVIN	Lipopolysaccharide-binding protein OS=Bos taurus GN=LBP PE=2 SV=1	87	53848	4	4	3	3
67	1	H2B1B_MOUSE	Histone H2B type 1-B OS=Mus musculus GN=Hist1h2bb PE=1 SV=3	83	13944	2	2	2	2
67		H2B1B_HUMAN	Histone H2B type 1-B OS=Homo sapiens GN=HIST1H2BB PE=1 SV=2	80	13942	1	1	1	1
67		H2B1N_BOVIN	Histone H2B type 1-N OS=Bos taurus GN=HIST1H2BN PE=1 SV=3	35	13915	1	1	1	1
68	1	CO2A1_BOVIN	Collagen alpha-1(II) chain OS=Bos taurus GN=COL2A1 PE=1 SV=4	82	142615	2	2	2	2
69	1	TBA1B_BOVIN	Tubulin alpha-1B chain OS=Bos taurus PE=1 SV=2	77	50671	4	4	2	2
69		TBA4A_BOVIN	Tubulin alpha-4A chain OS=Bos taurus GN=TUBA4A PE=1 SV=2	60	50490	3	3	1	1
69		TBA1A_CRIGR	Tubulin alpha-1A chain OS=Cricetulus griseus GN=TUBA1A PE=2 SV=1	48	50655	1	1	1	1
70	1	APOA4_BOVIN	Apolipoprotein A-IV OS=Bos taurus GN=APOA4 PE=2 SV=1	77	42991	4	4	3	3
71	1	APOD_CAVPO	Apolipoprotein D OS=Cavia porcellus GN=APOD PE=2 SV=1	76	21780	4	4	1	1
72	1	IBP6_BOVIN	Insulin-like growth factor-binding protein 6 OS=Bos taurus GN=IGFBP6 PE=2 SV=2	74	25687	1	1	1	1
73	1	COAA1_BOVIN	Collagen alpha-1(X) chain OS=Bos taurus GN=COL10A1 PE=2 SV=1	71	65643	3	3	1	1
74	1	LUM_BOVIN	Lumican OS=Bos taurus GN=LUM PE=1 SV=1	71	39008	3	3	2	2
75	1	KNG2_BOVIN	Kininogen-2 OS=Bos taurus GN=KNG2 PE=1 SV=1	69	69540	4	4	2	2
75		KNG1_BOVIN	Kininogen-1 OS=Bos taurus GN=KNG1 PE=1 SV=1	61	69720	3	3	1	1
76	1	IBP3_BOVIN	Insulin-like growth factor-binding protein 3 OS=Bos taurus GN=IGFBP3 PE=1 SV=3	67	32377	3	3	1	1
77	1	LAC2_HUMAN	Ig lambda-2 chain C regions OS=Homo sapiens GN=IGLC2 PE=1 SV=1	67	11425	2	2	2	2
77		IGLL5_HUMAN	Immunoglobulin lambda-like polypeptide 5 OS=Homo sapiens GN=IGLL5 PE=2 SV=2	53	23325	1	1	1	1
78	1	H2A1D_HUMAN	Histone H2A type 1-D OS=Homo sapiens GN=HIST1H2AD PE=1 SV=2	66	14099	5	5	2	2
78		H2A1B_HUMAN	Histone H2A type 1-B/E OS=Homo sapiens GN=HIST1H2AB PE=1 SV=2	52	14127	3	3	1	1
79	1	ITIH1_BOVIN	Inter-alpha-trypsin inhibitor heavy chain H1 OS=Bos taurus GN=ITIH1 PE=1 SV=1	65	101587	2	2	2	2
79		ITIH1_HUMAN	Inter-alpha-trypsin inhibitor heavy chain H1 OS=Homo sapiens GN=ITIH1 PE=1 SV=3	58	101694	1	1	1	1
80	1	TBB5_BOVIN	Tubulin beta-5 chain OS=Bos taurus GN=TUBB5 PE=2 SV=1	65	50007	3	3	3	3
80		TBB4A_BOVIN	Tubulin beta-4A chain OS=Bos taurus GN=TUBB4A PE=2 SV=1	36	49922	2	2	2	2
80		TBB1_HUMAN	Tubulin beta-1 chain OS=Homo sapiens GN=TUBB1 PE=1 SV=1	26	50754	1	1	1	1
81	1	IL27A_PIG	Interleukin-27 subunit alpha OS=Sus scrofa GN=IL27 PE=2 SV=1	64	26672	6	6	1	1
82	1	MTA70_HUMAN	N6-adenosine-methyltransferase 70 kDa subunit OS=Homo sapiens GN=METTL3 PE=1 SV=2	62	65031	6	6	1	1
83	1	LYSC_GORGO	Lysozyme C OS=Gorilla gorilla gorilla GN=LYZ PE=2 SV=1	61	16924	2	2	1	1
84	1	PPIB_BOVIN	Peptidyl-prolyl cis-trans isomerase B OS=Bos taurus GN=PPIB PE=1 SV=4	59	23775	1	1	1	1
85	1	PROS_BOVIN	Vitamin K-dependent protein S OS=Bos taurus GN=PROS1 PE=1 SV=1	58	76693	4	4	2	2
86	1	TLN1_HUMAN	Talin-1 OS=Homo sapiens GN=TLN1 PE=1 SV=3	56	271347	3	3	3	3
87	1	SPCS_MOUSE	O-phosphoseryl-tRNA(Sec) selenium transferase OS=Mus musculus GN=Sepsecs PE=1 SV=2	53	55888	7	7	1	1
88	1	CASPE_HUMAN	Caspase-14 OS=Homo sapiens GN=CASP14 PE=1 SV=2	51	27892	1	1	1	1
89	1	GSCR1_HUMAN	Glioma tumor suppressor candidate region gene 1 protein OS=Homo sapiens GN=GLTSCR1 PE=1 SV=2	48	158669	4	4	1	1
90	1	A2AP_BOVIN	Alpha-2-antiplasmin OS=Bos taurus GN=SERPINF2 PE=1 SV=2	47	54906	2	2	1	1
91	1	AMBP_BOVIN	Protein AMBP OS=Bos taurus GN=AMBP PE=1 SV=2	47	39945	2	2	1	1
92	1	K1H1_HUMAN	Keratin, type I cuticular Ha1 OS=Homo sapiens GN=KRT31 PE=1 SV=3	46	48357	1	1	1	1
93	1	ARGI1_HUMAN	Arginase-1 OS=Homo sapiens GN=ARG1 PE=1 SV=2	45	34851	2	2	2	2
94	1	MYH9_CANLF	Myosin-9 OS=Canis lupus familiaris GN=MYH9 PE=2 SV=1	41	227340	3	3	3	3
94		MYH11_HUMAN	Myosin-11 OS=Homo sapiens GN=MYH11 PE=1 SV=3	43	227889	1	1	1	1
94		MYH10_BOVIN	Myosin-10 OS=Bos taurus GN=MYH10 PE=2 SV=2	26	229740	1	1	1	1
95	1	FBLN5_BOVIN	Fibulin-5 OS=Bos taurus GN=FBLN5 PE=2 SV=1	40	52016	1	1	1	1
96	1	IGSF2_MOUSE	Immunoglobulin superfamily member 2 OS=Mus musculus GN=Cd101 PE=2 SV=1	40	115099	1	1	1	1
97	1	EF1A1_BOVIN	Elongation factor 1-alpha 1 OS=Bos taurus GN=EEF1A1 PE=1 SV=1	40	50385	1	1	1	1
98	1	APOA4_HUMAN	Apolipoprotein A-IV OS=Homo sapiens GN=APOA4 PE=1 SV=3	40	45371	2	2	1	1
99	1	FIBB_BOVIN	Fibrinogen beta chain OS=Bos taurus GN=FGB PE=1 SV=2	39	53812	1	1	1	1
100	1	LYST_BOVIN	Lysosomal-trafficking regulator OS=Bos taurus GN=LYST PE=1 SV=1	37	432743	1	1	1	1
101	1	PROF1_HUMAN	Profilin-1 OS=Homo sapiens GN=PFN1 PE=1 SV=2	36	15183	1	1	1	1
102	1	ROR2_HUMAN	Tyrosine-protein kinase transmembrane receptor ROR2 OS=Homo sapiens GN=ROR2 PE=1 SV=2	36	106023	1	1	1	1
103	1	CO7_BOVIN	Complement component C7 OS=Bos taurus GN=C7 PE=2 SV=1	35	95605	1	1	1	1
104	1	LPPRC_HUMAN	Leucine-rich PPR motif-containing protein, mitochondrial OS=Homo sapiens GN=LRPPRC PE=1 SV=3	35	158771	3	3	1	1
105	1	RET4_BOVIN	Retinol-binding protein 4 OS=Bos taurus GN=RBP4 PE=1 SV=1	35	21331	1	1	1	1
106	1	ZN423_HUMAN	Zinc finger protein 423 OS=Homo sapiens GN=ZNF423 PE=1 SV=1	34	147960	4	4	1	1
107	1	LITD1_MOUSE	LINE-1 type transposase domain-containing protein 1 OS=Mus musculus GN=L1td1 PE=2 SV=1	33	88595	3	3	1	1
108	1	THBG_BOVIN	Thyroxine-binding globulin OS=Bos taurus GN=SERPINA7 PE=2 SV=1	33	46310	1	1	1	1
109	1	EMIL2_HUMAN	EMILIN-2 OS=Homo sapiens GN=EMILIN2 PE=1 SV=3	33	116627	1	1	1	1
110	1	ARI5A_BOVIN	AT-rich interactive domain-containing protein 5A OS=Bos taurus GN=ARID5A PE=2 SV=1	33	64647	2	2	1	1
111	1	MYL6B_HUMAN	Myosin light chain 6B OS=Homo sapiens GN=MYL6B PE=1 SV=1	32	22842	1	1	1	1
112	1	RHG39_HUMAN	Rho GTPase-activating protein 39 OS=Homo sapiens GN=ARHGAP39 PE=1 SV=2	32	122037	1	1	1	1
113	1	COIA1_HUMAN	Collagen alpha-1(XVIII) chain OS=Homo sapiens GN=COL18A1 PE=1 SV=5	32	179135	1	1	1	1
114	1	CDC37_HUMAN	Hsp90 co-chaperone Cdc37 OS=Homo sapiens GN=CDC37 PE=1 SV=1	32	44854	1	1	1	1
115	1	SYNE2_MOUSE	Nesprin-2 OS=Mus musculus GN=Syne2 PE=1 SV=2	32	786883	1	1	1	1
116	1	PCDH1_HUMAN	Protocadherin-1 OS=Homo sapiens GN=PCDH1 PE=1 SV=2	31	114949	3	3	1	1
117	1	BPI_HUMAN	Bactericidal permeability-increasing protein OS=Homo sapiens GN=BPI PE=1 SV=4	31	54049	1	1	1	1
118	1	TMM64_HUMAN	Transmembrane protein 64 OS=Homo sapiens GN=TMEM64 PE=2 SV=2	31	40145	1	1	1	1
119	1	FA12_BOVIN	Coagulation factor XII OS=Bos taurus GN=F12 PE=1 SV=2	31	69048	2	2	1	1
120	1	TLR4_BOSTR	Toll-like receptor 4 OS=Boselaphus tragocamelus GN=TLR4 PE=2 SV=1	31	96920	1	1	1	1
121	1	COX41_BOVIN	Cytochrome c oxidase subunit 4 isoform 1, mitochondrial OS=Bos taurus GN=COX4I1 PE=1 SV=1	31	19605	4	4	1	1
122	1	S10A9_HUMAN	Protein S100-A9 OS=Homo sapiens GN=S100A9 PE=1 SV=1	31	13280	1	1	1	1
123	1	RIMB3_MOUSE	RIMS-binding protein 3 OS=Mus musculus GN=Rimbp3 PE=1 SV=1	31	164986	1	1	1	1
124	1	NXT2_BOVIN	NTF2-related export protein 2 OS=Bos taurus GN=NXT2 PE=2 SV=1	30	16441	2	2	1	1
125	1	TBCK_HUMAN	TBC domain-containing protein kinase-like protein OS=Homo sapiens GN=TBCK PE=1 SV=4	30	101719	2	2	1	1
126	1	KIF7_MOUSE	Kinesin-like protein KIF7 OS=Mus musculus GN=Kif7 PE=1 SV=1	30	152405	1	1	1	1
127	1	KRT37_HUMAN	Keratin, type I cuticular Ha7 OS=Homo sapiens GN=KRT37 PE=3 SV=3	30	50819	1	1	1	1
128	1	DUOX1_HUMAN	Dual oxidase 1 OS=Homo sapiens GN=DUOX1 PE=1 SV=1	29	178410	2	2	1	1
129	1	NEST_RAT	Nestin OS=Rattus norvegicus GN=Nes PE=1 SV=2	29	209361	1	1	1	1
130	1	AOCX_BOVIN	Primary amine oxidase, liver isozyme OS=Bos taurus PE=1 SV=1	28	85163	1	1	1	1
131	1	NCKP5_HUMAN	Nck-associated protein 5 OS=Homo sapiens GN=NCKAP5 PE=1 SV=2	28	209880	2	2	1	1
132	1	GLT10_HUMAN	Polypeptide N-acetylgalactosaminyltransferase 10 OS=Homo sapiens GN=GALNT10 PE=1 SV=2	27	69546	1	1	1	1
133	1	HD_MOUSE	Huntingtin OS=Mus musculus GN=Htt PE=1 SV=2	27	347736	1	1	1	1
134	1	ABC3B_HUMAN	DNA dC->dU-editing enzyme APOBEC-3B OS=Homo sapiens GN=APOBEC3B PE=1 SV=1	27	46584	2	2	1	1
135	1	UBIQ_CAMDR	Ubiquitin OS=Camelus dromedarius PE=3 SV=2	27	8560	1	1	1	1
136	1	DSG1_HUMAN	Desmoglein-1 OS=Homo sapiens GN=DSG1 PE=1 SV=2	27	114504	1	1	1	1
137	1	CFAD_BOVIN	Complement factor D OS=Bos taurus GN=CFD PE=2 SV=1	26	28274	1	1	1	1
138	1	COF1_BOVIN	Cofilin-1 OS=Bos taurus GN=CFL1 PE=2 SV=3	26	18737	1	1	1	1
139	1	CNDG2_MOUSE	Condensin-2 complex subunit G2 OS=Mus musculus GN=Ncapg2 PE=1 SV=2	26	132281	2	2	1	1
140	1	ZFHX4_HUMAN	Zinc finger homeobox protein 4 OS=Homo sapiens GN=ZFHX4 PE=1 SV=1	25	397253	2	2	1	1
141	1	SYNE1_HUMAN	Nesprin-1 OS=Homo sapiens GN=SYNE1 PE=1 SV=4	25	1015836	2	2	1	1
142	1	AMGO2_HUMAN	Amphoterin-induced protein 2 OS=Homo sapiens GN=AMIGO2 PE=1 SV=1	25	58678	1	1	1	1
143	1	MTX3_HUMAN	Metaxin-3 OS=Homo sapiens GN=MTX3 PE=1 SV=2	25	35255	1	1	1	1
144	1	MTND_MOUSE	1,2-dihydroxy-3-keto-5-methylthiopentene dioxygenase OS=Mus musculus GN=Adi1 PE=1 SV=1	25	21556	1	1	1	1
145	1	ANF_FELCA	Natriuretic peptides A OS=Felis catus GN=NPPA PE=3 SV=1	25	16710	1	1	1	1
146	1	CCNA1_HUMAN	Cyclin-A1 OS=Homo sapiens GN=CCNA1 PE=1 SV=1	24	52830	1	1	1	1
147	1	UBE3B_HUMAN	Ubiquitin-protein ligase E3B OS=Homo sapiens GN=UBE3B PE=1 SV=3	24	124215	1	1	1	1
148	1	CO6A2_HUMAN	Collagen alpha-2(VI) chain OS=Homo sapiens GN=COL6A2 PE=1 SV=4	24	109478	1	1	1	1
149	1	FETUA_PANTR	Alpha-2-HS-glycoprotein OS=Pan troglodytes GN=AHSG PE=3 SV=1	24	40063	1	1	1	1
150	1	NCOA6_HUMAN	Nuclear receptor coactivator 6 OS=Homo sapiens GN=NCOA6 PE=1 SV=3	23	219284	1	1	1	1
151	1	CALX_CANLF	Calnexin OS=Canis lupus familiaris GN=CANX PE=1 SV=3	23	67929	1	1	1	1
152	1	PROC_CAPHI	Vitamin K-dependent protein C (Fragment) OS=Capra hircus GN=PROC PE=2 SV=1	23	17470	1	1	1	1
153	1	ADAM2_BOVIN	Disintegrin and metalloproteinase domain-containing protein 2 OS=Bos taurus GN=ADAM2 PE=2 SV=1	23	85119	1	1	1	1
154	1	CYTSB_HUMAN	Cytospin-B OS=Homo sapiens GN=SPECC1 PE=1 SV=1	23	119064	2	2	1	1
155	1	OXLD1_MOUSE	Oxidoreductase-like domain-containing protein 1 OS=Mus musculus GN=Oxld1 PE=1 SV=1	23	22624	1	1	1	1
156	1	TRHDE_HUMAN	Thyrotropin-releasing hormone-degrading ectoenzyme OS=Homo sapiens GN=TRHDE PE=2 SV=1	22	117340	1	1	1	1
157	1	VGFR3_HUMAN	Vascular endothelial growth factor receptor 3 OS=Homo sapiens GN=FLT4 PE=1 SV=3	22	154362	1	1	1	1
158	1	NPA1P_MOUSE	Nucleolar pre-ribosomal-associated protein 1 OS=Mus musculus GN=Urb1 PE=1 SV=2	21	256153	1	1	1	1

## Sheet: S-5-Peptide Data
This is the *.csv PEPTIDE export from the Mascot search performed on all runs from the in-gel digests of the protein corona.
The Header displays the search parameters
The Protein hits list all the identified peptides
To include all FBS proteins, mammalia was chosen as taxonomy. Note that species distinction requires a separate workflow. In case all the peptides of a certain protein can be found in different organisms, only one hit is reported. In general, species can be mapped back to BOVIN alone in this experiment, except for the common contaminating proteins from the CrAP database (https://www.thegpm.org/cr…
Header	--------------------------------------------------------
Search title	Human Proteome
Timestamp	2017-12-13T12:10:02Z
User	MD
Email
Report URI	http://fw01c326.ugent.be/mascot/cgi/master_results.pl?file=../data/20171213/F002744.dat
Peak list data path	C:\ProgramData\Matrix Science\Mascot Daemon\MGF\309 171213 MD MAhtab NoCell Mammelia Merge Search NoCell\mascot_daemon_merge.mgf
Peak list format	Mascot generic
Search type	MIS
Mascot version	2.6.1
Database	SwissProt
Fasta file	SwissProt_2016_11.fasta
Total sequences	553231
Total residues	197953409
Sequences after taxonomy filter	66512
Number of queries	142900
Fixed modifications	--------------------------------------------------------
Identifier	Name	Delta	Neutral loss
1	Methylthio (C)	45.9877
Variable modifications	--------------------------------------------------------
Identifier	Name	Delta	Neutral loss(es)
1	Deamidated (NQ)	0.984016
2	Oxidation (M)	15.9949	0	63.9983
Search Parameters	--------------------------------------------------------
Taxonomy filter	. . . . . . . . . . . . Mammalia (mammals)
Enzyme	Trypsin
Maximum Missed Cleavages	1
Fixed modifications	Methylthio (C)
Variable modifications	Deamidated (NQ),Oxidation (M)
Peptide Mass Tolerance	10
Peptide Mass Tolerance Units	ppm
Fragment Mass Tolerance	0.1
Fragment Mass Tolerance Units	Da
Mass values	Monoisotopic
Instrument type	SynaptG2Si HDDDA
Format parameters	--------------------------------------------------------
Significance threshold	0.01
Max. number of hits	0
Use MudPIT protein scoring	1
Ions score cut-off	-1
Include same-set proteins	0
Include sub-set proteins	1
Include unassigned	0
Require bold red	0
Use homology threshold	1
Group protein families	1
Show duplicate peptides	1
Protein hits	--------------------------------------------------------
prot_hit_num	prot_family_member	prot_acc	prot_desc	prot_score	prot_mass	prot_matches	prot_matches_sig	prot_sequences	prot_sequences_sig	prot_tax_str	prot_tax_id	pep_query	pep_rank	pep_isbold	pep_isunique	pep_exp_mz	pep_exp_mr	pep_exp_z	pep_calc_mr	pep_delta	pep_miss	pep_score	pep_expect	pep_res_before	pep_seq	pep_res_after	pep_var_mod	pep_var_mod_pos	pep_summed_mod_pos	pep_local_mod_pos	Sample
1	1	K2C1_HUMAN	Keratin, type II cytoskeletal 1 OS=Homo sapiens GN=KRT1 PE=1 SV=6	15238	66137	498	498	29	29	Homo sapiens	9606	49753	1	1	0	590.303	1178.59	2	1178.59	-0.0024	0	33.42	0.0074	K	YEELQITAGR	H					Un_NoBSA
1	1	K2C1_HUMAN	Keratin, type II cytoskeletal 1 OS=Homo sapiens GN=KRT1 PE=1 SV=6	15238	66137	498	498	29	29	Homo sapiens	9606	49761	1	1	0	590.306	1178.6	2	1178.59	0.0051	0	34.35	0.0063	K	YEELQITAGR	H					Ar_NoBSA
1	1	K2C1_HUMAN	Keratin, type II cytoskeletal 1 OS=Homo sapiens GN=KRT1 PE=1 SV=6	15238	66137	498	498	29	29	Homo sapiens	9606	49763	1	1	0	590.307	1178.6	2	1178.59	0.006	0	65.29	1.2e-05	K	YEELQITAGR	H					Un_NoBSA
1	1	K2C1_HUMAN	Keratin, type II cytoskeletal 1 OS=Homo sapiens GN=KRT1 PE=1 SV=6	15238	66137	498	498	29	29	Homo sapiens	9606	49766	1	1	0	590.308	1178.6	2	1178.59	0.008	0	57.66	7.7e-05	K	YEELQITAGR	H					N2_NoBSA
1	1	K2C1_HUMAN	Keratin, type II cytoskeletal 1 OS=Homo sapiens GN=KRT1 PE=1 SV=6	15238	66137	498	498	29	29	Homo sapiens	9606	49767	1	1	0	590.308	1178.6	2	1178.59	0.0081	0	51.62	0.00031	K	YEELQITAGR	H					BSA
1	1	K2C1_HUMAN	Keratin, type II cytoskeletal 1 OS=Homo sapiens GN=KRT1 PE=1 SV=6	15238	66137	498	498	29	29	Homo sapiens	9606	49771	1	1	0	590.309	1178.6	2	1178.59	0.0108	0	69.51	5.2e-06	K	YEELQITAGR	H					NoBSA
1	1	K2C1_HUMAN	Keratin, type II cytoskeletal 1 OS=Homo sapiens GN=KRT1 PE=1 SV=6	15238	66137	498	498	29	29	Homo sapiens	9606	60867	1	1	1	633.324	1264.63	2	1264.63	0.0036	0	51.51	5.2e-05	R	TNAENEFVTIK	K					NoBSA
1	1	K2C1_HUMAN	Keratin, type II cytoskeletal 1 OS=Homo sapiens GN=KRT1 PE=1 SV=6	15238	66137	498	498	29	29	Homo sapiens	9606	60873	1	1	1	633.327	1264.64	2	1264.63	0.0087	0	53.3	1.6e-05	R	TNAENEFVTIK	K					N2_BSA
1	1	K2C1_HUMAN	Keratin, type II cytoskeletal 1 OS=Homo sapiens GN=KRT1 PE=1 SV=6	15238	66137	498	498	29	29	Homo sapiens	9606	60874	1	1	1	633.327	1264.64	2	1264.63	0.0087	0	39.48	0.0002	R	TNAENEFVTIK	K					Un_BSA
1	1	K2C1_HUMAN	Keratin, type II cytoskeletal 1 OS=Homo sapiens GN=KRT1 PE=1 SV=6	15238	66137	498	498	29	29	Homo sapiens	9606	60875	1	1	1	633.327	1264.64	2	1264.63	0.0096	0	41.11	0.00015	R	TNAENEFVTIK	K					Ar_BSA
1	1	K2C1_HUMAN	Keratin, type II cytoskeletal 1 OS=Homo sapiens GN=KRT1 PE=1 SV=6	15238	66137	498	498	29	29	Homo sapiens	9606	60879	1	1	1	633.328	1264.64	2	1264.63	0.0126	0	41.05	0.00034	R	TNAENEFVTIK	K					N2_NoBSA
1	1	K2C1_HUMAN	Keratin, type II cytoskeletal 1 OS=Homo sapiens GN=KRT1 PE=1 SV=6	15238	66137	498	498	29	29	Homo sapiens	9606	62228	1	1	1	639.326	1276.64	2	1276.63	0.0113	1	41.08	0.0036	K	SDQSRLDSELK	N					Nh3_BSA
1	1	K2C1_HUMAN	Keratin, type II cytoskeletal 1 OS=Homo sapiens GN=KRT1 PE=1 SV=6	15238	66137	498	498	29	29	Homo sapiens	9606	62453	1	1	1	639.358	1276.7	2	1276.7	-0.001	0	46.61	0.00049	K	LALDLEIATYR	T					Ar_NoBSA
1	1	K2C1_HUMAN	Keratin, type II cytoskeletal 1 OS=Homo sapiens GN=KRT1 PE=1 SV=6	15238	66137	498	498	29	29	Homo sapiens	9606	62592	1	1	1	639.36	1276.71	2	1276.7	0.0033	0	28.41	0.0022	K	LALDLEIATYR	T					N2_NoBSA
1	1	K2C1_HUMAN	Keratin, type II cytoskeletal 1 OS=Homo sapiens GN=KRT1 PE=1 SV=6	15238	66137	498	498	29	29	Homo sapiens	9606	62593	1	1	1	639.361	1276.71	2	1276.7	0.0041	0	35.04	0.00052	K	LALDLEIATYR	T					Nh3_BSA
1	1	K2C1_HUMAN	Keratin, type II cytoskeletal 1 OS=Homo sapiens GN=KRT1 PE=1 SV=6	15238	66137	498	498	29	29	Homo sapiens	9606	62594	1	1	1	639.361	1276.71	2	1276.7	0.0049	0	53.73	9.2e-06	K	LALDLEIATYR	T					Un_NoBSA
1	1	K2C1_HUMAN	Keratin, type II cytoskeletal 1 OS=Homo sapiens GN=KRT1 PE=1 SV=6	15238	66137	498	498	29	29	Homo sapiens	9606	62595	1	1	1	639.361	1276.71	2	1276.7	0.005	0	61.66	1e-05	K	LALDLEIATYR	T					Ar_BSA
1	1	K2C1_HUMAN	Keratin, type II cytoskeletal 1 OS=Homo sapiens GN=KRT1 PE=1 SV=6	15238	66137	498	498	29	29	Homo sapiens	9606	62391	1	1	1	639.361	1276.71	2	1276.7	0.0052	0	59.19	6e-06	K	LALDLEIATYR	T					Ar_BSA
1	1	K2C1_HUMAN	Keratin, type II cytoskeletal 1 OS=Homo sapiens GN=KRT1 PE=1 SV=6	15238	66137	498	498	29	29	Homo sapiens	9606	62407	1	1	1	639.362	1276.71	2	1276.7	0.0078	0	61.14	1.3e-05	K	LALDLEIATYR	T					Nh3_NoBSA
1	1	K2C1_HUMAN	Keratin, type II cytoskeletal 1 OS=Homo sapiens GN=KRT1 PE=1 SV=6	15238	66137	498	498	29	29	Homo sapiens	9606	62596	1	1	1	639.363	1276.71	2	1276.7	0.0079	0	34.77	0.00078	K	LALDLEIATYR	T					N2_NoBSA
1	1	K2C1_HUMAN	Keratin, type II cytoskeletal 1 OS=Homo sapiens GN=KRT1 PE=1 SV=6	15238	66137	498	498	29	29	Homo sapiens	9606	62597	1	1	1	639.363	1276.71	2	1276.7	0.0084	0	59.12	3.8e-06	K	LALDLEIATYR	T					N2_NoBSA
1	1	K2C1_HUMAN	Keratin, type II cytoskeletal 1 OS=Homo sapiens GN=KRT1 PE=1 SV=6	15238	66137	498	498	29	29	Homo sapiens	9606	62598	1	1	1	639.363	1276.71	2	1276.7	0.0095	0	91.35	1.3e-08	K	LALDLEIATYR	T					NoBSA
1	1	K2C1_HUMAN	Keratin, type II cytoskeletal 1 OS=Homo sapiens GN=KRT1 PE=1 SV=6	15238	66137	498	498	29	29	Homo sapiens	9606	62599	1	1	1	639.364	1276.71	2	1276.7	0.0101	0	66.44	2.5e-06	K	LALDLEIATYR	T					Nh3_BSA
1	1	K2C1_HUMAN	Keratin, type II cytoskeletal 1 OS=Homo sapiens GN=KRT1 PE=1 SV=6	15238	66137	498	498	29	29	Homo sapiens	9606	62600	1	1	1	639.364	1276.71	2	1276.7	0.0105	0	70.79	1.8e-06	K	LALDLEIATYR	T					Ar_BSA
1	1	K2C1_HUMAN	Keratin, type II cytoskeletal 1 OS=Homo sapiens GN=KRT1 PE=1 SV=6	15238	66137	498	498	29	29	Homo sapiens	9606	62601	1	1	1	639.364	1276.71	2	1276.7	0.0106	0	62.2	1.5e-06	K	LALDLEIATYR	T					Ar_BSA
1	1	K2C1_HUMAN	Keratin, type II cytoskeletal 1 OS=Homo sapiens GN=KRT1 PE=1 SV=6	15238	66137	498	498	29	29	Homo sapiens	9606	62602	1	1	1	639.364	1276.71	2	1276.7	0.0111	0	71.15	1.7e-06	K	LALDLEIATYR	T					Nh3_BSA
1	1	K2C1_HUMAN	Keratin, type II cytoskeletal 1 OS=Homo sapiens GN=KRT1 PE=1 SV=6	15238	66137	498	498	29	29	Homo sapiens	9606	62603	1	1	1	639.364	1276.71	2	1276.7	0.0112	0	32.88	0.00084	K	LALDLEIATYR	T					Nh3_NoBSA
1	1	K2C1_HUMAN	Keratin, type II cytoskeletal 1 OS=Homo sapiens GN=KRT1 PE=1 SV=6	15238	66137	498	498	29	29	Homo sapiens	9606	62604	1	1	1	639.364	1276.71	2	1276.7	0.0114	0	51.13	6.9e-05	K	LALDLEIATYR	T					N2_NoBSA
1	1	K2C1_HUMAN	Keratin, type II cytoskeletal 1 OS=Homo sapiens GN=KRT1 PE=1 SV=6	15238	66137	498	498	29	29	Homo sapiens	9606	62605	1	1	1	639.365	1276.71	2	1276.7	0.0118	0	46.65	4.5e-05	K	LALDLEIATYR	T					BSA
1	1	K2C1_HUMAN	Keratin, type II cytoskeletal 1 OS=Homo sapiens GN=KRT1 PE=1 SV=6	15238	66137	498	498	29	29	Homo sapiens	9606	62606	1	1	1	639.365	1276.71	2	1276.7	0.0118	0	90.97	9e-09	K	LALDLEIATYR	T					Ar_BSA
1	1	K2C1_HUMAN	Keratin, type II cytoskeletal 1 OS=Homo sapiens GN=KRT1 PE=1 SV=6	15238	66137	498	498	29	29	Homo sapiens	9606	62607	1	1	1	639.365	1276.71	2	1276.7	0.012	0	68.14	5.2e-07	K	LALDLEIATYR	T					N2_BSA
1	1	K2C1_HUMAN	Keratin, type II cytoskeletal 1 OS=Homo sapiens GN=KRT1 PE=1 SV=6	15238	66137	498	498	29	29	Homo sapiens	9606	62608	1	1	1	639.365	1276.71	2	1276.7	0.012	0	59.82	6.1e-06	K	LALDLEIATYR	T					Un_BSA
1	1	K2C1_HUMAN	Keratin, type II cytoskeletal 1 OS=Homo sapiens GN=KRT1 PE=1 SV=6	15238	66137	498	498	29	29	Homo sapiens	9606	62609	1	1	1	639.365	1276.71	2	1276.7	0.0121	0	43.83	7.8e-05	K	LALDLEIATYR	T					Ar_BSA
1	1	K2C1_HUMAN	Keratin, type II cytoskeletal 1 OS=Homo sapiens GN=KRT1 PE=1 SV=6	15238	66137	498	498	29	29	Homo sapiens	9606	62610	1	1	1	639.365	1276.71	2	1276.7	0.0123	0	64.73	8.5e-07	K	LALDLEIATYR	T					Un_BSA
1	1	K2C1_HUMAN	Keratin, type II cytoskeletal 1 OS=Homo sapiens GN=KRT1 PE=1 SV=6	15238	66137	498	498	29	29	Homo sapiens	9606	62613	1	1	1	639.365	1276.72	2	1276.7	0.0127	0	65.03	2.1e-06	K	LALDLEIATYR	T					N2_BSA
1	1	K2C1_HUMAN	Keratin, type II cytoskeletal 1 OS=Homo sapiens GN=KRT1 PE=1 SV=6	15238	66137	498	498	29	29	Homo sapiens	9606	62614	1	1	1	639.365	1276.72	2	1276.7	0.0127	0	46.97	3.9e-05	K	LALDLEIATYR	T					N2_BSA
1	1	K2C1_HUMAN	Keratin, type II cytoskeletal 1 OS=Homo sapiens GN=KRT1 PE=1 SV=6	15238	66137	498	498	29	29	Homo sapiens	9606	65621	1	1	1	651.855	1301.7	2	1301.69	0.0021	1	44.46	0.00044	R	NSKIEISELNR	V					N2_BSA
1	1	K2C1_HUMAN	Keratin, type II cytoskeletal 1 OS=Homo sapiens GN=KRT1 PE=1 SV=6	15238	66137	498	498	29	29	Homo sapiens	9606	65624	1	1	1	651.856	1301.7	2	1301.69	0.0046	1	56.33	8.7e-05	R	NSKIEISELNR	V					NoBSA
1	1	K2C1_HUMAN	Keratin, type II cytoskeletal 1 OS=Homo sapiens GN=KRT1 PE=1 SV=6	15238	66137	498	498	29	29	Homo sapiens	9606	65625	1	1	1	651.856	1301.7	2	1301.69	0.0046	1	57.95	6e-05	R	NSKIEISELNR	V					N2_NoBSA
1	1	K2C1_HUMAN	Keratin, type II cytoskeletal 1 OS=Homo sapiens GN=KRT1 PE=1 SV=6	15238	66137	498	498	29	29	Homo sapiens	9606	65629	1	1	1	651.858	1301.7	2	1301.69	0.0075	1	53.71	0.00016	R	NSKIEISELNR	V					BSA
1	1	K2C1_HUMAN	Keratin, type II cytoskeletal 1 OS=Homo sapiens GN=KRT1 PE=1 SV=6	15238	66137	498	498	29	29	Homo sapiens	9606	65631	1	1	1	651.859	1301.7	2	1301.69	0.0089	1	38.24	0.0056	R	NSKIEISELNR	V					Un_NoBSA
1	1	K2C1_HUMAN	Keratin, type II cytoskeletal 1 OS=Homo sapiens GN=KRT1 PE=1 SV=6	15238	66137	498	498	29	29	Homo sapiens	9606	65632	1	1	1	651.859	1301.7	2	1301.69	0.009	1	41.13	0.0014	R	NSKIEISELNR	V					N2_NoBSA
1	1	K2C1_HUMAN	Keratin, type II cytoskeletal 1 OS=Homo sapiens GN=KRT1 PE=1 SV=6	15238	66137	498	498	29	29	Homo sapiens	9606	65633	1	1	1	651.859	1301.7	2	1301.69	0.0102	1	58.03	5.7e-05	R	NSKIEISELNR	V					Nh3_NoBSA
1	1	K2C1_HUMAN	Keratin, type II cytoskeletal 1 OS=Homo sapiens GN=KRT1 PE=1 SV=6	15238	66137	498	498	29	29	Homo sapiens	9606	65634	1	1	1	651.859	1301.7	2	1301.69	0.0104	1	41.39	0.0016	R	NSKIEISELNR	V					Ar_BSA
1	1	K2C1_HUMAN	Keratin, type II cytoskeletal 1 OS=Homo sapiens GN=KRT1 PE=1 SV=6	15238	66137	498	498	29	29	Homo sapiens	9606	65637	1	1	1	651.86	1301.71	2	1301.69	0.0115	1	60.85	2.8e-05	R	NSKIEISELNR	V					BSA
1	1	K2C1_HUMAN	Keratin, type II cytoskeletal 1 OS=Homo sapiens GN=KRT1 PE=1 SV=6	15238	66137	498	498	29	29	Homo sapiens	9606	65638	1	1	1	651.86	1301.71	2	1301.69	0.0115	1	54.65	6.3e-05	R	NSKIEISELNR	V					Nh3_NoBSA
1	1	K2C1_HUMAN	Keratin, type II cytoskeletal 1 OS=Homo sapiens GN=KRT1 PE=1 SV=6	15238	66137	498	498	29	29	Homo sapiens	9606	65641	1	1	1	651.86	1301.71	2	1301.69	0.012	1	47.69	0.00022	R	NSKIEISELNR	V					Nh3_NoBSA
1	1	K2C1_HUMAN	Keratin, type II cytoskeletal 1 OS=Homo sapiens GN=KRT1 PE=1 SV=6	15238	66137	498	498	29	29	Homo sapiens	9606	65648	1	1	0	651.861	1301.71	2	1301.71	-0.0003	0	65.06	1.1e-05	R	SLDLDSIIAEVK	A					Un_NoBSA
1	1	K2C1_HUMAN	Keratin, type II cytoskeletal 1 OS=Homo sapiens GN=KRT1 PE=1 SV=6	15238	66137	498	498	29	29	Homo sapiens	9606	114672	1	1	0	651.863	1301.71	2	1301.71	0.0033	0	38.64	0.00024	R	SLDLDSIIAEVK	A					NoBSA
1	1	K2C1_HUMAN	Keratin, type II cytoskeletal 1 OS=Homo sapiens GN=KRT1 PE=1 SV=6	15238	66137	498	498	29	29	Homo sapiens	9606	65665	1	1	0	651.863	1301.71	2	1301.71	0.0042	0	29.7	0.0016	R	SLDLDSIIAEVK	A					N2_BSA
1	1	K2C1_HUMAN	Keratin, type II cytoskeletal 1 OS=Homo sapiens GN=KRT1 PE=1 SV=6	15238	66137	498	498	29	29	Homo sapiens	9606	65668	1	1	0	651.864	1301.71	2	1301.71	0.0059	0	51.31	2.6e-05	R	SLDLDSIIAEVK	A					Ar_NoBSA
1	1	K2C1_HUMAN	Keratin, type II cytoskeletal 1 OS=Homo sapiens GN=KRT1 PE=1 SV=6	15238	66137	498	498	29	29	Homo sapiens	9606	65672	1	1	0	651.865	1301.71	2	1301.71	0.0068	0	28.87	0.002	R	SLDLDSIIAEVK	A					Un_BSA
1	1	K2C1_HUMAN	Keratin, type II cytoskeletal 1 OS=Homo sapiens GN=KRT1 PE=1 SV=6	15238	66137	498	498	29	29	Homo sapiens	9606	65374	1	1	0	651.865	1301.72	2	1301.71	0.0078	0	75.79	5.8e-07	R	SLDLDSIIAEVK	A					N2_NoBSA
1	1	K2C1_HUMAN	Keratin, type II cytoskeletal 1 OS=Homo sapiens GN=KRT1 PE=1 SV=6	15238	66137	498	498	29	29	Homo sapiens	9606	65677	1	1	0	651.865	1301.72	2	1301.71	0.0082	0	45.14	5.8e-05	R	SLDLDSIIAEVK	A					BSA
1	1	K2C1_HUMAN	Keratin, type II cytoskeletal 1 OS=Homo sapiens GN=KRT1 PE=1 SV=6	15238	66137	498	498	29	29	Homo sapiens	9606	65682	1	1	0	651.867	1301.72	2	1301.71	0.0108	0	58.82	1.3e-05	R	SLDLDSIIAEVK	A					Nh3_BSA
1	1	K2C1_HUMAN	Keratin, type II cytoskeletal 1 OS=Homo sapiens GN=KRT1 PE=1 SV=6	15238	66137	498	498	29	29	Homo sapiens	9606	65684	1	1	0	651.867	1301.72	2	1301.71	0.0111	0	45.23	0.00015	R	SLDLDSIIAEVK	A					Ar_BSA
1	1	K2C1_HUMAN	Keratin, type II cytoskeletal 1 OS=Homo sapiens GN=KRT1 PE=1 SV=6	15238	66137	498	498	29	29	Homo sapiens	9606	65380	1	1	0	651.867	1301.72	2	1301.71	0.0116	0	66.78	6e-06	R	SLDLDSIIAEVK	A					Ar_BSA
1	1	K2C1_HUMAN	Keratin, type II cytoskeletal 1 OS=Homo sapiens GN=KRT1 PE=1 SV=6	15238	66137	498	498	29	29	Homo sapiens	9606	65687	1	1	0	651.867	1301.72	2	1301.71	0.0118	0	48.41	5.9e-05	R	SLDLDSIIAEVK	A					Nh3_NoBSA
1	1	K2C1_HUMAN	Keratin, type II cytoskeletal 1 OS=Homo sapiens GN=KRT1 PE=1 SV=6	15238	66137	498	498	29	29	Homo sapiens	9606	65690	1	1	0	651.867	1301.72	2	1301.71	0.0118	0	79.74	3e-07	R	SLDLDSIIAEVK	A					Nh3_BSA
1	1	K2C1_HUMAN	Keratin, type II cytoskeletal 1 OS=Homo sapiens GN=KRT1 PE=1 SV=6	15238	66137	498	498	29	29	Homo sapiens	9606	65691	1	1	0	651.867	1301.72	2	1301.71	0.0118	0	41.62	0.00013	R	SLDLDSIIAEVK	A					N2_BSA
1	1	K2C1_HUMAN	Keratin, type II cytoskeletal 1 OS=Homo sapiens GN=KRT1 PE=1 SV=6	15238	66137	498	498	29	29	Homo sapiens	9606	65404	1	1	0	651.867	1301.72	2	1301.71	0.012	0	75.55	7.9e-07	R	SLDLDSIIAEVK	A					Nh3_NoBSA
1	1	K2C1_HUMAN	Keratin, type II cytoskeletal 1 OS=Homo sapiens GN=KRT1 PE=1 SV=6	15238	66137	498	498	29	29	Homo sapiens	9606	65694	1	1	0	651.867	1301.72	2	1301.71	0.0121	0	46.43	4.4e-05	R	SLDLDSIIAEVK	A					Ar_BSA
1	1	K2C1_HUMAN	Keratin, type II cytoskeletal 1 OS=Homo sapiens GN=KRT1 PE=1 SV=6	15238	66137	498	498	29	29	Homo sapiens	9606	65695	1	1	0	651.867	1301.72	2	1301.71	0.0123	0	78.78	3.8e-07	R	SLDLDSIIAEVK	A					NoBSA
1	1	K2C1_HUMAN	Keratin, type II cytoskeletal 1 OS=Homo sapiens GN=KRT1 PE=1 SV=6	15238	66137	498	498	29	29	Homo sapiens	9606	65393	1	1	0	651.867	1301.72	2	1301.71	0.0125	0	54.74	2.2e-05	R	SLDLDSIIAEVK	A					N2_NoBSA
1	1	K2C1_HUMAN	Keratin, type II cytoskeletal 1 OS=Homo sapiens GN=KRT1 PE=1 SV=6	15238	66137	498	498	29	29	Homo sapiens	9606	65698	1	1	0	651.868	1301.72	2	1301.71	0.0129	0	36.93	0.00034	R	SLDLDSIIAEVK	A					Nh3_BSA
1	1	K2C1_HUMAN	Keratin, type II cytoskeletal 1 OS=Homo sapiens GN=KRT1 PE=1 SV=6	15238	66137	498	498	29	29	Homo sapiens	9606	65699	1	1	0	651.868	1301.72	2	1301.71	0.013	0	72.8	6.6e-07	R	SLDLDSIIAEVK	A					Un_BSA
1	1	K2C1_HUMAN	Keratin, type II cytoskeletal 1 OS=Homo sapiens GN=KRT1 PE=1 SV=6	15238	66137	498	498	29	29	Homo sapiens	9606	69861	1	1	1	666.766	1331.52	2	1331.51	0.006	0	52.89	1.1e-05	K	NMQDMVEDYR	N	2 Oxidation (M)	0.0200200000.0			Un_BSA
1	1	K2C1_HUMAN	Keratin, type II cytoskeletal 1 OS=Homo sapiens GN=KRT1 PE=1 SV=6	15238	66137	498	498	29	29	Homo sapiens	9606	69862	1	1	1	666.767	1331.52	2	1331.51	0.0078	0	59.03	2.9e-06	K	NMQDMVEDYR	N	2 Oxidation (M)	0.0200200000.0			Ar_BSA
1	1	K2C1_HUMAN	Keratin, type II cytoskeletal 1 OS=Homo sapiens GN=KRT1 PE=1 SV=6	15238	66137	498	498	29	29	Homo sapiens	9606	69864	1	1	1	666.768	1331.52	2	1331.51	0.0089	0	59.69	6.4e-06	K	NMQDMVEDYR	N	2 Oxidation (M)	0.0200200000.0			Ar_BSA
1	1	K2C1_HUMAN	Keratin, type II cytoskeletal 1 OS=Homo sapiens GN=KRT1 PE=1 SV=6	15238	66137	498	498	29	29	Homo sapiens	9606	69865	1	1	1	666.769	1331.52	2	1331.51	0.0102	0	63.31	4.4e-06	K	NMQDMVEDYR	N	2 Oxidation (M)	0.0200200000.0			Ar_NoBSA
1	1	K2C1_HUMAN	Keratin, type II cytoskeletal 1 OS=Homo sapiens GN=KRT1 PE=1 SV=6	15238	66137	498	498	29	29	Homo sapiens	9606	69868	1	1	1	666.769	1331.52	2	1331.51	0.0107	0	50.45	1.9e-05	K	NMQDMVEDYR	N	2 Oxidation (M)	0.0200200000.0			Ar_BSA
1	1	K2C1_HUMAN	Keratin, type II cytoskeletal 1 OS=Homo sapiens GN=KRT1 PE=1 SV=6	15238	66137	498	498	29	29	Homo sapiens	9606	69869	1	1	1	666.769	1331.52	2	1331.51	0.0112	0	52.02	1.3e-05	K	NMQDMVEDYR	N	2 Oxidation (M)	0.0200200000.0			BSA
1	1	K2C1_HUMAN	Keratin, type II cytoskeletal 1 OS=Homo sapiens GN=KRT1 PE=1 SV=6	15238	66137	498	498	29	29	Homo sapiens	9606	69870	1	1	1	666.769	1331.52	2	1331.51	0.0115	0	59.72	7.6e-06	K	NMQDMVEDYR	N	2 Oxidation (M)	0.0200200000.0			BSA
1	1	K2C1_HUMAN	Keratin, type II cytoskeletal 1 OS=Homo sapiens GN=KRT1 PE=1 SV=6	15238	66137	498	498	29	29	Homo sapiens	9606	69871	1	1	1	666.769	1331.52	2	1331.51	0.012	0	61.89	1.6e-06	K	NMQDMVEDYR	N	2 Oxidation (M)	0.0200200000.0			Nh3_NoBSA
1	1	K2C1_HUMAN	Keratin, type II cytoskeletal 1 OS=Homo sapiens GN=KRT1 PE=1 SV=6	15238	66137	498	498	29	29	Homo sapiens	9606	69872	1	1	1	666.77	1331.52	2	1331.51	0.0126	0	44.75	6.4e-05	K	NMQDMVEDYR	N	2 Oxidation (M)	0.0200200000.0			Un_BSA
1	1	K2C1_HUMAN	Keratin, type II cytoskeletal 1 OS=Homo sapiens GN=KRT1 PE=1 SV=6	15238	66137	498	498	29	29	Homo sapiens	9606	69873	1	1	1	666.77	1331.53	2	1331.51	0.0129	0	59.64	2.6e-06	K	NMQDMVEDYR	N	2 Oxidation (M)	0.0200200000.0			N2_NoBSA
1	1	K2C1_HUMAN	Keratin, type II cytoskeletal 1 OS=Homo sapiens GN=KRT1 PE=1 SV=6	15238	66137	498	498	29	29	Homo sapiens	9606	69874	1	1	1	666.77	1331.53	2	1331.51	0.0133	0	55.25	6.6e-06	K	NMQDMVEDYR	N	2 Oxidation (M)	0.0200200000.0			Un_NoBSA
1	1	K2C1_HUMAN	Keratin, type II cytoskeletal 1 OS=Homo sapiens GN=KRT1 PE=1 SV=6	15238	66137	498	498	29	29	Homo sapiens	9606	70011	1	1	1	667.261	1332.51	2	1332.5	0.012	0	29.9	0.0016	K	NMQDMVEDYR	N	Deamidated (NQ); 2 Oxidation (M)	0.0210200000.0			N2_NoBSA
1	1	K2C1_HUMAN	Keratin, type II cytoskeletal 1 OS=Homo sapiens GN=KRT1 PE=1 SV=6	15238	66137	498	498	29	29	Homo sapiens	9606	72891	1	1	1	679.351	1356.69	2	1356.69	0.0001	0	68.2	1.3e-06	K	LNDLEDALQQAK	E					Nh3_NoBSA
1	1	K2C1_HUMAN	Keratin, type II cytoskeletal 1 OS=Homo sapiens GN=KRT1 PE=1 SV=6	15238	66137	498	498	29	29	Homo sapiens	9606	72898	1	1	1	679.353	1356.69	2	1356.69	0.0028	0	66.5	2.7e-06	K	LNDLEDALQQAK	E					BSA
1	1	K2C1_HUMAN	Keratin, type II cytoskeletal 1 OS=Homo sapiens GN=KRT1 PE=1 SV=6	15238	66137	498	498	29	29	Homo sapiens	9606	72901	1	1	1	679.353	1356.69	2	1356.69	0.0038	0	32.63	0.00087	K	LNDLEDALQQAK	E					Ar_NoBSA
1	1	K2C1_HUMAN	Keratin, type II cytoskeletal 1 OS=Homo sapiens GN=KRT1 PE=1 SV=6	15238	66137	498	498	29	29	Homo sapiens	9606	72906	1	1	1	679.354	1356.69	2	1356.69	0.0047	0	53.91	1.3e-05	K	LNDLEDALQQAK	E					Nh3_BSA
1	1	K2C1_HUMAN	Keratin, type II cytoskeletal 1 OS=Homo sapiens GN=KRT1 PE=1 SV=6	15238	66137	498	498	29	29	Homo sapiens	9606	72907	1	1	1	679.355	1356.69	2	1356.69	0.006	0	71.12	8.4e-07	K	LNDLEDALQQAK	E					N2_NoBSA
1	1	K2C1_HUMAN	Keratin, type II cytoskeletal 1 OS=Homo sapiens GN=KRT1 PE=1 SV=6	15238	66137	498	498	29	29	Homo sapiens	9606	72915	1	1	1	679.355	1356.7	2	1356.69	0.0074	0	51.12	3.6e-05	K	LNDLEDALQQAK	E					Un_NoBSA
1	1	K2C1_HUMAN	Keratin, type II cytoskeletal 1 OS=Homo sapiens GN=KRT1 PE=1 SV=6	15238	66137	498	498	29	29	Homo sapiens	9606	72920	1	1	1	679.356	1356.7	2	1356.69	0.0087	0	90.57	2.9e-08	K	LNDLEDALQQAK	E					Nh3_BSA
1	1	K2C1_HUMAN	Keratin, type II cytoskeletal 1 OS=Homo sapiens GN=KRT1 PE=1 SV=6	15238	66137	498	498	29	29	Homo sapiens	9606	72921	1	1	1	679.356	1356.7	2	1356.69	0.0088	0	68.61	1.5e-06	K	LNDLEDALQQAK	E					BSA
1	1	K2C1_HUMAN	Keratin, type II cytoskeletal 1 OS=Homo sapiens GN=KRT1 PE=1 SV=6	15238	66137	498	498	29	29	Homo sapiens	9606	72927	1	1	1	679.356	1356.7	2	1356.69	0.0099	0	65.73	8.2e-06	K	LNDLEDALQQAK	E					Un_BSA
1	1	K2C1_HUMAN	Keratin, type II cytoskeletal 1 OS=Homo sapiens GN=KRT1 PE=1 SV=6	15238	66137	498	498	29	29	Homo sapiens	9606	72929	1	1	1	679.357	1356.7	2	1356.69	0.0108	0	45.93	0.00014	K	LNDLEDALQQAK	E					NoBSA
1	1	K2C1_HUMAN	Keratin, type II cytoskeletal 1 OS=Homo sapiens GN=KRT1 PE=1 SV=6	15238	66137	498	498	29	29	Homo sapiens	9606	72931	1	1	1	679.357	1356.7	2	1356.69	0.0112	0	63.85	4.2e-06	K	LNDLEDALQQAK	E					N2_NoBSA
1	1	K2C1_HUMAN	Keratin, type II cytoskeletal 1 OS=Homo sapiens GN=KRT1 PE=1 SV=6	15238	66137	498	498	29	29	Homo sapiens	9606	72933	1	1	1	679.357	1356.7	2	1356.69	0.0115	0	57.92	1.1e-05	K	LNDLEDALQQAK	E					Ar_BSA
1	1	K2C1_HUMAN	Keratin, type II cytoskeletal 1 OS=Homo sapiens GN=KRT1 PE=1 SV=6	15238	66137	498	498	29	29	Homo sapiens	9606	72934	1	1	1	679.357	1356.7	2	1356.69	0.0117	0	63.03	5.7e-06	K	LNDLEDALQQAK	E					NoBSA
1	1	K2C1_HUMAN	Keratin, type II cytoskeletal 1 OS=Homo sapiens GN=KRT1 PE=1 SV=6	15238	66137	498	498	29	29	Homo sapiens	9606	72936	1	1	1	679.357	1356.7	2	1356.69	0.012	0	57.29	1.3e-05	K	LNDLEDALQQAK	E					N2_BSA
1	1	K2C1_HUMAN	Keratin, type II cytoskeletal 1 OS=Homo sapiens GN=KRT1 PE=1 SV=6	15238	66137	498	498	29	29	Homo sapiens	9606	73110	1	1	1	679.842	1357.67	2	1357.67	-0.0027	0	30.24	0.0015	K	LNDLEDALQQAK	E	Deamidated (NQ)	0.000000000100.0			BSA
1	1	K2C1_HUMAN	Keratin, type II cytoskeletal 1 OS=Homo sapiens GN=KRT1 PE=1 SV=6	15238	66137	498	498	29	29	Homo sapiens	9606	73113	1	1	1	679.844	1357.67	2	1357.67	0.0018	0	23.39	0.0064	K	LNDLEDALQQAK	E	Deamidated (NQ)	0.000000000100.0			BSA
1	1	K2C1_HUMAN	Keratin, type II cytoskeletal 1 OS=Homo sapiens GN=KRT1 PE=1 SV=6	15238	66137	498	498	29	29	Homo sapiens	9606	73114	1	1	1	679.848	1357.68	2	1357.67	0.0093	0	44.55	0.00024	K	LNDLEDALQQAK	E	Deamidated (NQ)	0.000000000100.0			Nh3_BSA
1	1	K2C1_HUMAN	Keratin, type II cytoskeletal 1 OS=Homo sapiens GN=KRT1 PE=1 SV=6	15238	66137	498	498	29	29	Homo sapiens	9606	73115	1	1	1	679.848	1357.68	2	1357.67	0.0094	0	39.3	0.0014	K	LNDLEDALQQAK	E	Deamidated (NQ)	0.000000001000.0			BSA
1	1	K2C1_HUMAN	Keratin, type II cytoskeletal 1 OS=Homo sapiens GN=KRT1 PE=1 SV=6	15238	66137	498	498	29	29	Homo sapiens	9606	73117	1	1	1	679.848	1357.68	2	1357.67	0.0098	0	26.17	0.009	K	LNDLEDALQQAK	E	Deamidated (NQ)	0.000000000100.0			BSA
1	1	K2C1_HUMAN	Keratin, type II cytoskeletal 1 OS=Homo sapiens GN=KRT1 PE=1 SV=6	15238	66137	498	498	29	29	Homo sapiens	9606	75784	1	1	1	692.345	1382.67	2	1382.68	-0.0084	0	48.07	5.1e-05	K	SLNNQFASFIDK	V					Ar_NoBSA
1	1	K2C1_HUMAN	Keratin, type II cytoskeletal 1 OS=Homo sapiens GN=KRT1 PE=1 SV=6	15238	66137	498	498	29	29	Homo sapiens	9606	75785	1	1	1	692.347	1382.68	2	1382.68	-0.0036	0	53.45	3.4e-05	K	SLNNQFASFIDK	V					N2_NoBSA
1	1	K2C1_HUMAN	Keratin, type II cytoskeletal 1 OS=Homo sapiens GN=KRT1 PE=1 SV=6	15238	66137	498	498	29	29	Homo sapiens	9606	75787	1	1	1	692.348	1382.68	2	1382.68	-0.0021	0	60.28	9.6e-06	K	SLNNQFASFIDK	V					N2_BSA
1	1	K2C1_HUMAN	Keratin, type II cytoskeletal 1 OS=Homo sapiens GN=KRT1 PE=1 SV=6	15238	66137	498	498	29	29	Homo sapiens	9606	75792	1	1	1	692.35	1382.68	2	1382.68	0.0016	0	62.37	1.2e-05	K	SLNNQFASFIDK	V					Ar_BSA
1	1	K2C1_HUMAN	Keratin, type II cytoskeletal 1 OS=Homo sapiens GN=KRT1 PE=1 SV=6	15238	66137	498	498	29	29	Homo sapiens	9606	75794	1	1	1	692.351	1382.69	2	1382.68	0.0034	0	73.82	5.8e-07	K	SLNNQFASFIDK	V					Nh3_BSA
1	1	K2C1_HUMAN	Keratin, type II cytoskeletal 1 OS=Homo sapiens GN=KRT1 PE=1 SV=6	15238	66137	498	498	29	29	Homo sapiens	9606	75795	1	1	1	692.351	1382.69	2	1382.68	0.004	0	49.57	0.00014	K	SLNNQFASFIDK	V					NoBSA
1	1	K2C1_HUMAN	Keratin, type II cytoskeletal 1 OS=Homo sapiens GN=KRT1 PE=1 SV=6	15238	66137	498	498	29	29	Homo sapiens	9606	75796	1	1	1	692.351	1382.69	2	1382.68	0.004	0	99.51	4.1e-09	K	SLNNQFASFIDK	V					Ar_NoBSA
1	1	K2C1_HUMAN	Keratin, type II cytoskeletal 1 OS=Homo sapiens GN=KRT1 PE=1 SV=6	15238	66137	498	498	29	29	Homo sapiens	9606	75798	1	1	1	692.351	1382.69	2	1382.68	0.0047	0	76.64	8.2e-07	K	SLNNQFASFIDK	V					N2_NoBSA
1	1	K2C1_HUMAN	Keratin, type II cytoskeletal 1 OS=Homo sapiens GN=KRT1 PE=1 SV=6	15238	66137	498	498	29	29	Homo sapiens	9606	75800	1	1	1	692.351	1382.69	2	1382.68	0.0048	0	35.51	0.00047	K	SLNNQFASFIDK	V					Un_BSA
1	1	K2C1_HUMAN	Keratin, type II cytoskeletal 1 OS=Homo sapiens GN=KRT1 PE=1 SV=6	15238	66137	498	498	29	29	Homo sapiens	9606	75801	1	1	1	692.352	1382.69	2	1382.68	0.006	0	37.24	0.00032	K	SLNNQFASFIDK	V					Nh3_BSA
1	1	K2C1_HUMAN	Keratin, type II cytoskeletal 1 OS=Homo sapiens GN=KRT1 PE=1 SV=6	15238	66137	498	498	29	29	Homo sapiens	9606	75803	1	1	1	692.352	1382.69	2	1382.68	0.0065	0	38.13	0.00027	K	SLNNQFASFIDK	V					Nh3_NoBSA
1	1	K2C1_HUMAN	Keratin, type II cytoskeletal 1 OS=Homo sapiens GN=KRT1 PE=1 SV=6	15238	66137	498	498	29	29	Homo sapiens	9606	75804	1	1	1	692.352	1382.69	2	1382.68	0.0066	0	68.21	2.4e-06	K	SLNNQFASFIDK	V					NoBSA
1	1	K2C1_HUMAN	Keratin, type II cytoskeletal 1 OS=Homo sapiens GN=KRT1 PE=1 SV=6	15238	66137	498	498	29	29	Homo sapiens	9606	75806	1	1	1	692.352	1382.69	2	1382.68	0.0067	0	65.6	4.9e-06	K	SLNNQFASFIDK	V					BSA
1	1	K2C1_HUMAN	Keratin, type II cytoskeletal 1 OS=Homo sapiens GN=KRT1 PE=1 SV=6	15238	66137	498	498	29	29	Homo sapiens	9606	75809	1	1	1	692.353	1382.69	2	1382.68	0.0084	0	65.34	6e-06	K	SLNNQFASFIDK	V					N2_BSA
1	1	K2C1_HUMAN	Keratin, type II cytoskeletal 1 OS=Homo sapiens GN=KRT1 PE=1 SV=6	15238	66137	498	498	29	29	Homo sapiens	9606	75810	1	1	1	692.353	1382.69	2	1382.68	0.0084	0	74.19	1.5e-06	K	SLNNQFASFIDK	V					Nh3_NoBSA
1	1	K2C1_HUMAN	Keratin, type II cytoskeletal 1 OS=Homo sapiens GN=KRT1 PE=1 SV=6	15238	66137	498	498	29	29	Homo sapiens	9606	75813	1	1	1	692.353	1382.69	2	1382.68	0.0088	0	93.35	1.9e-08	K	SLNNQFASFIDK	V					Ar_BSA
1	1	K2C1_HUMAN	Keratin, type II cytoskeletal 1 OS=Homo sapiens GN=KRT1 PE=1 SV=6	15238	66137	498	498	29	29	Homo sapiens	9606	75815	1	1	1	692.353	1382.69	2	1382.68	0.0091	0	93.26	1.5e-08	K	SLNNQFASFIDK	V					Un_BSA
1	1	K2C1_HUMAN	Keratin, type II cytoskeletal 1 OS=Homo sapiens GN=KRT1 PE=1 SV=6	15238	66137	498	498	29	29	Homo sapiens	9606	75817	1	1	1	692.353	1382.69	2	1382.68	0.0091	0	70.2	8.4e-07	K	SLNNQFASFIDK	V					Ar_NoBSA
1	1	K2C1_HUMAN	Keratin, type II cytoskeletal 1 OS=Homo sapiens GN=KRT1 PE=1 SV=6	15238	66137	498	498	29	29	Homo sapiens	9606	75818	1	1	1	692.353	1382.69	2	1382.68	0.0092	0	51.4	4.9e-05	K	SLNNQFASFIDK	V					NoBSA
1	1	K2C1_HUMAN	Keratin, type II cytoskeletal 1 OS=Homo sapiens GN=KRT1 PE=1 SV=6	15238	66137	498	498	29	29	Homo sapiens	9606	75822	1	1	1	692.354	1382.69	2	1382.68	0.0098	0	93.33	1.5e-08	K	SLNNQFASFIDK	V					Nh3_NoBSA
1	1	K2C1_HUMAN	Keratin, type II cytoskeletal 1 OS=Homo sapiens GN=KRT1 PE=1 SV=6	15238	66137	498	498	29	29	Homo sapiens	9606	75823	1	1	1	692.354	1382.69	2	1382.68	0.01	0	93.23	1.8e-08	K	SLNNQFASFIDK	V					BSA
1	1	K2C1_HUMAN	Keratin, type II cytoskeletal 1 OS=Homo sapiens GN=KRT1 PE=1 SV=6	15238	66137	498	498	29	29	Homo sapiens	9606	75824	1	1	1	692.354	1382.69	2	1382.68	0.0109	0	31.08	0.0026	K	SLNNQFASFIDK	V					NoBSA
1	1	K2C1_HUMAN	Keratin, type II cytoskeletal 1 OS=Homo sapiens GN=KRT1 PE=1 SV=6	15238	66137	498	498	29	29	Homo sapiens	9606	75827	1	1	1	692.355	1382.69	2	1382.68	0.0115	0	64.29	8.1e-06	K	SLNNQFASFIDK	V					BSA
1	1	K2C1_HUMAN	Keratin, type II cytoskeletal 1 OS=Homo sapiens GN=KRT1 PE=1 SV=6	15238	66137	498	498	29	29	Homo sapiens	9606	75828	1	1	1	692.355	1382.7	2	1382.68	0.0125	0	93.31	1.9e-08	K	SLNNQFASFIDK	V					Nh3_NoBSA
1	1	K2C1_HUMAN	Keratin, type II cytoskeletal 1 OS=Homo sapiens GN=KRT1 PE=1 SV=6	15238	66137	498	498	29	29	Homo sapiens	9606	75937	1	1	1	692.844	1383.67	2	1383.67	0.0063	0	73.19	5.7e-07	K	SLNNQFASFIDK	V	Deamidated (NQ)	0.000010000000.0			Nh3_BSA
1	1	K2C1_HUMAN	Keratin, type II cytoskeletal 1 OS=Homo sapiens GN=KRT1 PE=1 SV=6	15238	66137	498	498	29	29	Homo sapiens	9606	75938	1	1	1	692.845	1383.67	2	1383.67	0.0076	0	56.42	5.1e-06	K	SLNNQFASFIDK	V	Deamidated (NQ)	0.000100000000.0			Un_NoBSA
1	1	K2C1_HUMAN	Keratin, type II cytoskeletal 1 OS=Homo sapiens GN=KRT1 PE=1 SV=6	15238	66137	498	498	29	29	Homo sapiens	9606	75939	1	1	1	692.847	1383.68	2	1383.67	0.0126	0	28.88	0.002	K	SLNNQFASFIDK	V	Deamidated (NQ)	0.000100000000.0			Un_BSA
1	1	K2C1_HUMAN	Keratin, type II cytoskeletal 1 OS=Homo sapiens GN=KRT1 PE=1 SV=6	15238	66137	498	498	29	29	Homo sapiens	9606	77028	1	1	1	697.368	1392.72	2	1392.72	-0.0033	1	73.46	1e-06	R	TNAENEFVTIKK	D					Un_NoBSA
1	1	K2C1_HUMAN	Keratin, type II cytoskeletal 1 OS=Homo sapiens GN=KRT1 PE=1 SV=6	15238	66137	498	498	29	29	Homo sapiens	9606	77034	1	1	1	697.369	1392.72	2	1392.72	-0.0012	1	73.99	1.6e-06	R	TNAENEFVTIKK	D					BSA
1	1	K2C1_HUMAN	Keratin, type II cytoskeletal 1 OS=Homo sapiens GN=KRT1 PE=1 SV=6	15238	66137	498	498	29	29	Homo sapiens	9606	77035	1	1	1	697.372	1392.73	2	1392.72	0.0047	1	74.27	1.3e-06	R	TNAENEFVTIKK	D					Nh3_NoBSA
1	1	K2C1_HUMAN	Keratin, type II cytoskeletal 1 OS=Homo sapiens GN=KRT1 PE=1 SV=6	15238	66137	498	498	29	29	Homo sapiens	9606	77038	1	1	1	697.372	1392.73	2	1392.72	0.0055	1	73.77	5.4e-07	R	TNAENEFVTIKK	D					Un_NoBSA
1	1	K2C1_HUMAN	Keratin, type II cytoskeletal 1 OS=Homo sapiens GN=KRT1 PE=1 SV=6	15238	66137	498	498	29	29	Homo sapiens	9606	77039	1	1	1	697.372	1392.73	2	1392.72	0.0056	1	79.05	4.2e-07	R	TNAENEFVTIKK	D					Un_BSA
1	1	K2C1_HUMAN	Keratin, type II cytoskeletal 1 OS=Homo sapiens GN=KRT1 PE=1 SV=6	15238	66137	498	498	29	29	Homo sapiens	9606	77040	1	1	1	697.373	1392.73	2	1392.72	0.0061	1	73.9	1e-06	R	TNAENEFVTIKK	D					Un_BSA
1	1	K2C1_HUMAN	Keratin, type II cytoskeletal 1 OS=Homo sapiens GN=KRT1 PE=1 SV=6	15238	66137	498	498	29	29	Homo sapiens	9606	77041	1	1	1	697.373	1392.73	2	1392.72	0.0062	1	56.37	1.6e-05	R	TNAENEFVTIKK	D					Ar_NoBSA
1	1	K2C1_HUMAN	Keratin, type II cytoskeletal 1 OS=Homo sapiens GN=KRT1 PE=1 SV=6	15238	66137	498	498	29	29	Homo sapiens	9606	77042	1	1	1	697.373	1392.73	2	1392.72	0.0065	1	74.29	6e-07	R	TNAENEFVTIKK	D					Ar_NoBSA
1	1	K2C1_HUMAN	Keratin, type II cytoskeletal 1 OS=Homo sapiens GN=KRT1 PE=1 SV=6	15238	66137	498	498	29	29	Homo sapiens	9606	77043	1	1	1	697.373	1392.73	2	1392.72	0.0069	1	60.83	4.8e-06	R	TNAENEFVTIKK	D					Nh3_BSA
1	1	K2C1_HUMAN	Keratin, type II cytoskeletal 1 OS=Homo sapiens GN=KRT1 PE=1 SV=6	15238	66137	498	498	29	29	Homo sapiens	9606	77044	1	1	1	697.373	1392.73	2	1392.72	0.0072	1	64.29	3.6e-06	R	TNAENEFVTIKK	D					NoBSA
1	1	K2C1_HUMAN	Keratin, type II cytoskeletal 1 OS=Homo sapiens GN=KRT1 PE=1 SV=6	15238	66137	498	498	29	29	Homo sapiens	9606	77047	1	1	1	697.374	1392.73	2	1392.72	0.008	1	70.07	3e-06	R	TNAENEFVTIKK	D					N2_BSA
1	1	K2C1_HUMAN	Keratin, type II cytoskeletal 1 OS=Homo sapiens GN=KRT1 PE=1 SV=6	15238	66137	498	498	29	29	Homo sapiens	9606	77048	1	1	1	697.374	1392.73	2	1392.72	0.0087	1	42.41	0.0014	R	TNAENEFVTIKK	D					Nh3_NoBSA
1	1	K2C1_HUMAN	Keratin, type II cytoskeletal 1 OS=Homo sapiens GN=KRT1 PE=1 SV=6	15238	66137	498	498	29	29	Homo sapiens	9606	77049	1	1	1	697.374	1392.73	2	1392.72	0.0087	1	85.17	1e-07	R	TNAENEFVTIKK	D					N2_NoBSA
1	1	K2C1_HUMAN	Keratin, type II cytoskeletal 1 OS=Homo sapiens GN=KRT1 PE=1 SV=6	15238	66137	498	498	29	29	Homo sapiens	9606	77050	1	1	1	697.374	1392.73	2	1392.72	0.0091	1	79.11	4.1e-07	R	TNAENEFVTIKK	D					BSA
1	1	K2C1_HUMAN	Keratin, type II cytoskeletal 1 OS=Homo sapiens GN=KRT1 PE=1 SV=6	15238	66137	498	498	29	29	Homo sapiens	9606	77051	1	1	1	697.374	1392.73	2	1392.72	0.0091	1	61.12	7.1e-06	R	TNAENEFVTIKK	D					Nh3_NoBSA
1	1	K2C1_HUMAN	Keratin, type II cytoskeletal 1 OS=Homo sapiens GN=KRT1 PE=1 SV=6	15238	66137	498	498	29	29	Homo sapiens	9606	77052	1	1	1	697.374	1392.73	2	1392.72	0.0092	1	66.74	2.9e-06	R	TNAENEFVTIKK	D					Nh3_BSA
1	1	K2C1_HUMAN	Keratin, type II cytoskeletal 1 OS=Homo sapiens GN=KRT1 PE=1 SV=6	15238	66137	498	498	29	29	Homo sapiens	9606	77054	1	1	1	697.375	1392.73	2	1392.72	0.0095	1	99.11	2.3e-09	R	TNAENEFVTIKK	D					Ar_BSA
1	1	K2C1_HUMAN	Keratin, type II cytoskeletal 1 OS=Homo sapiens GN=KRT1 PE=1 SV=6	15238	66137	498	498	29	29	Homo sapiens	9606	77057	1	1	1	697.375	1392.74	2	1392.72	0.0105	1	78.92	4.3e-07	R	TNAENEFVTIKK	D					N2_BSA
1	1	K2C1_HUMAN	Keratin, type II cytoskeletal 1 OS=Homo sapiens GN=KRT1 PE=1 SV=6	15238	66137	498	498	29	29	Homo sapiens	9606	77058	1	1	1	697.375	1392.74	2	1392.72	0.0105	1	55.09	2.4e-05	R	TNAENEFVTIKK	D					NoBSA
1	1	K2C1_HUMAN	Keratin, type II cytoskeletal 1 OS=Homo sapiens GN=KRT1 PE=1 SV=6	15238	66137	498	498	29	29	Homo sapiens	9606	77059	1	1	1	697.375	1392.74	2	1392.72	0.0105	1	69.46	2.4e-06	R	TNAENEFVTIKK	D					N2_BSA
1	1	K2C1_HUMAN	Keratin, type II cytoskeletal 1 OS=Homo sapiens GN=KRT1 PE=1 SV=6	15238	66137	498	498	29	29	Homo sapiens	9606	77061	1	1	1	697.375	1392.74	2	1392.72	0.0109	1	66.62	7.2e-06	R	TNAENEFVTIKK	D					N2_NoBSA
1	1	K2C1_HUMAN	Keratin, type II cytoskeletal 1 OS=Homo sapiens GN=KRT1 PE=1 SV=6	15238	66137	498	498	29	29	Homo sapiens	9606	77064	1	1	1	697.375	1392.74	2	1392.72	0.011	1	70.27	3.1e-06	R	TNAENEFVTIKK	D					Un_BSA
1	1	K2C1_HUMAN	Keratin, type II cytoskeletal 1 OS=Homo sapiens GN=KRT1 PE=1 SV=6	15238	66137	498	498	29	29	Homo sapiens	9606	77066	1	1	1	697.376	1392.74	2	1392.72	0.012	1	70.21	2.5e-06	R	TNAENEFVTIKK	D					Nh3_BSA
1	1	K2C1_HUMAN	Keratin, type II cytoskeletal 1 OS=Homo sapiens GN=KRT1 PE=1 SV=6	15238	66137	498	498	29	29	Homo sapiens	9606	77068	1	1	1	697.376	1392.74	2	1392.72	0.0132	1	73.85	1.5e-06	R	TNAENEFVTIKK	D					Ar_BSA
1	1	K2C1_HUMAN	Keratin, type II cytoskeletal 1 OS=Homo sapiens GN=KRT1 PE=1 SV=6	15238	66137	498	498	29	29	Homo sapiens	9606	79854	1	1	1	711.373	1420.73	2	1420.73	-0.0003	1	47.1	9.9e-05	K	RTNAENEFVTIK	K					Un_BSA
1	1	K2C1_HUMAN	Keratin, type II cytoskeletal 1 OS=Homo sapiens GN=KRT1 PE=1 SV=6	15238	66137	498	498	29	29	Homo sapiens	9606	79855	1	1	1	711.373	1420.73	2	1420.73	0.0001	1	73.33	2.1e-06	K	RTNAENEFVTIK	K					N2_NoBSA
1	1	K2C1_HUMAN	Keratin, type II cytoskeletal 1 OS=Homo sapiens GN=KRT1 PE=1 SV=6	15238	66137	498	498	29	29	Homo sapiens	9606	79857	1	1	1	711.375	1420.73	2	1420.73	0.0035	1	56.99	7.9e-05	K	RTNAENEFVTIK	K					Ar_BSA
1	1	K2C1_HUMAN	Keratin, type II cytoskeletal 1 OS=Homo sapiens GN=KRT1 PE=1 SV=6	15238	66137	498	498	29	29	Homo sapiens	9606	79858	1	1	1	711.375	1420.73	2	1420.73	0.0039	1	60.49	2.7e-05	K	RTNAENEFVTIK	K					N2_NoBSA
1	1	K2C1_HUMAN	Keratin, type II cytoskeletal 1 OS=Homo sapiens GN=KRT1 PE=1 SV=6	15238	66137	498	498	29	29	Homo sapiens	9606	79860	1	1	1	711.375	1420.74	2	1420.73	0.0046	1	67.88	6.3e-06	K	RTNAENEFVTIK	K					Ar_NoBSA
1	1	K2C1_HUMAN	Keratin, type II cytoskeletal 1 OS=Homo sapiens GN=KRT1 PE=1 SV=6	15238	66137	498	498	29	29	Homo sapiens	9606	79862	1	1	1	711.375	1420.74	2	1420.73	0.0048	1	86.94	7.9e-08	K	RTNAENEFVTIK	K					Nh3_NoBSA
1	1	K2C1_HUMAN	Keratin, type II cytoskeletal 1 OS=Homo sapiens GN=KRT1 PE=1 SV=6	15238	66137	498	498	29	29	Homo sapiens	9606	79866	1	1	1	711.375	1420.74	2	1420.73	0.0055	1	67.45	6.7e-06	K	RTNAENEFVTIK	K					NoBSA
1	1	K2C1_HUMAN	Keratin, type II cytoskeletal 1 OS=Homo sapiens GN=KRT1 PE=1 SV=6	15238	66137	498	498	29	29	Homo sapiens	9606	79867	1	1	1	711.376	1420.74	2	1420.73	0.0057	1	52.81	0.00015	K	RTNAENEFVTIK	K					Nh3_BSA
1	1	K2C1_HUMAN	Keratin, type II cytoskeletal 1 OS=Homo sapiens GN=KRT1 PE=1 SV=6	15238	66137	498	498	29	29	Homo sapiens	9606	79868	1	1	1	711.376	1420.74	2	1420.73	0.0059	1	63.76	1.5e-05	K	RTNAENEFVTIK	K					Nh3_BSA
1	1	K2C1_HUMAN	Keratin, type II cytoskeletal 1 OS=Homo sapiens GN=KRT1 PE=1 SV=6	15238	66137	498	498	29	29	Homo sapiens	9606	79869	1	1	1	711.376	1420.74	2	1420.73	0.0061	1	80.97	3.1e-07	K	RTNAENEFVTIK	K					N2_BSA
1	1	K2C1_HUMAN	Keratin, type II cytoskeletal 1 OS=Homo sapiens GN=KRT1 PE=1 SV=6	15238	66137	498	498	29	29	Homo sapiens	9606	79871	1	1	1	711.376	1420.74	2	1420.73	0.0069	1	61.53	2.6e-05	K	RTNAENEFVTIK	K					Ar_NoBSA
1	1	K2C1_HUMAN	Keratin, type II cytoskeletal 1 OS=Homo sapiens GN=KRT1 PE=1 SV=6	15238	66137	498	498	29	29	Homo sapiens	9606	79872	1	1	1	711.376	1420.74	2	1420.73	0.0071	1	67.86	5.9e-06	K	RTNAENEFVTIK	K					BSA
1	1	K2C1_HUMAN	Keratin, type II cytoskeletal 1 OS=Homo sapiens GN=KRT1 PE=1 SV=6	15238	66137	498	498	29	29	Homo sapiens	9606	79874	1	1	1	711.376	1420.74	2	1420.73	0.0073	1	65.08	1.1e-05	K	RTNAENEFVTIK	K					Un_NoBSA
1	1	K2C1_HUMAN	Keratin, type II cytoskeletal 1 OS=Homo sapiens GN=KRT1 PE=1 SV=6	15238	66137	498	498	29	29	Homo sapiens	9606	79875	1	1	1	711.376	1420.74	2	1420.73	0.0074	1	81.06	2.8e-07	K	RTNAENEFVTIK	K					Nh3_NoBSA
1	1	K2C1_HUMAN	Keratin, type II cytoskeletal 1 OS=Homo sapiens GN=KRT1 PE=1 SV=6	15238	66137	498	498	29	29	Homo sapiens	9606	79876	1	1	1	711.376	1420.74	2	1420.73	0.0074	1	80.85	2.9e-07	K	RTNAENEFVTIK	K					N2_NoBSA
1	1	K2C1_HUMAN	Keratin, type II cytoskeletal 1 OS=Homo sapiens GN=KRT1 PE=1 SV=6	15238	66137	498	498	29	29	Homo sapiens	9606	79877	1	1	1	711.377	1420.74	2	1420.73	0.0078	1	80.88	2.8e-07	K	RTNAENEFVTIK	K					Un_BSA
1	1	K2C1_HUMAN	Keratin, type II cytoskeletal 1 OS=Homo sapiens GN=KRT1 PE=1 SV=6	15238	66137	498	498	29	29	Homo sapiens	9606	79878	1	1	1	711.377	1420.74	2	1420.73	0.0083	1	73.35	1.6e-06	K	RTNAENEFVTIK	K					BSA
1	1	K2C1_HUMAN	Keratin, type II cytoskeletal 1 OS=Homo sapiens GN=KRT1 PE=1 SV=6	15238	66137	498	498	29	29	Homo sapiens	9606	79879	1	1	1	711.377	1420.74	2	1420.73	0.0084	1	65.01	1.1e-05	K	RTNAENEFVTIK	K					Un_NoBSA
1	1	K2C1_HUMAN	Keratin, type II cytoskeletal 1 OS=Homo sapiens GN=KRT1 PE=1 SV=6	15238	66137	498	498	29	29	Homo sapiens	9606	79880	1	1	1	711.377	1420.74	2	1420.73	0.0084	1	67.76	5.8e-06	K	RTNAENEFVTIK	K					N2_BSA
1	1	K2C1_HUMAN	Keratin, type II cytoskeletal 1 OS=Homo sapiens GN=KRT1 PE=1 SV=6	15238	66137	498	498	29	29	Homo sapiens	9606	79882	1	1	1	711.377	1420.74	2	1420.73	0.0088	1	66.41	7.9e-06	K	RTNAENEFVTIK	K					Nh3_NoBSA
1	1	K2C1_HUMAN	Keratin, type II cytoskeletal 1 OS=Homo sapiens GN=KRT1 PE=1 SV=6	15238	66137	498	498	29	29	Homo sapiens	9606	79883	1	1	1	711.377	1420.74	2	1420.73	0.0091	1	80.47	3.1e-07	K	RTNAENEFVTIK	K					N2_BSA
1	1	K2C1_HUMAN	Keratin, type II cytoskeletal 1 OS=Homo sapiens GN=KRT1 PE=1 SV=6	15238	66137	498	498	29	29	Homo sapiens	9606	79885	1	1	1	711.378	1420.74	2	1420.73	0.0095	1	73.44	1.6e-06	K	RTNAENEFVTIK	K					Un_BSA
1	1	K2C1_HUMAN	Keratin, type II cytoskeletal 1 OS=Homo sapiens GN=KRT1 PE=1 SV=6	15238	66137	498	498	29	29	Homo sapiens	9606	79886	1	1	1	711.378	1420.74	2	1420.73	0.0101	1	67.43	6.3e-06	K	RTNAENEFVTIK	K					Ar_BSA
1	1	K2C1_HUMAN	Keratin, type II cytoskeletal 1 OS=Homo sapiens GN=KRT1 PE=1 SV=6	15238	66137	498	498	29	29	Homo sapiens	9606	79888	1	1	1	711.378	1420.74	2	1420.73	0.011	1	70.17	3.6e-06	K	RTNAENEFVTIK	K					BSA
1	1	K2C1_HUMAN	Keratin, type II cytoskeletal 1 OS=Homo sapiens GN=KRT1 PE=1 SV=6	15238	66137	498	498	29	29	Homo sapiens	9606	79890	1	1	1	711.379	1420.74	2	1420.73	0.012	1	67.22	7.2e-06	K	RTNAENEFVTIK	K					NoBSA
1	1	K2C1_HUMAN	Keratin, type II cytoskeletal 1 OS=Homo sapiens GN=KRT1 PE=1 SV=6	15238	66137	498	498	29	29	Homo sapiens	9606	79892	1	1	1	711.379	1420.74	2	1420.73	0.0129	1	69.94	3.9e-06	K	RTNAENEFVTIK	K					Ar_NoBSA
1	1	K2C1_HUMAN	Keratin, type II cytoskeletal 1 OS=Homo sapiens GN=KRT1 PE=1 SV=6	15238	66137	498	498	29	29	Homo sapiens	9606	79894	1	1	1	711.38	1420.74	2	1420.73	0.0136	1	68.6	5.3e-06	K	RTNAENEFVTIK	K					Nh3_BSA
1	1	K2C1_HUMAN	Keratin, type II cytoskeletal 1 OS=Homo sapiens GN=KRT1 PE=1 SV=6	15238	66137	498	498	29	29	Homo sapiens	9606	79896	1	1	1	711.38	1420.75	2	1420.73	0.0141	1	67.91	6.1e-06	K	RTNAENEFVTIK	K					Ar_BSA
1	1	K2C1_HUMAN	Keratin, type II cytoskeletal 1 OS=Homo sapiens GN=KRT1 PE=1 SV=6	15238	66137	498	498	29	29	Homo sapiens	9606	85179	1	1	1	738.374	1474.73	2	1474.74	-0.0077	0	69.25	1.2e-06	K	WELLQQVDTSTR	T					NoBSA
1	1	K2C1_HUMAN	Keratin, type II cytoskeletal 1 OS=Homo sapiens GN=KRT1 PE=1 SV=6	15238	66137	498	498	29	29	Homo sapiens	9606	85180	1	1	1	738.375	1474.74	2	1474.74	-0.0062	0	51.83	3.3e-05	K	WELLQQVDTSTR	T					Ar_NoBSA
1	1	K2C1_HUMAN	Keratin, type II cytoskeletal 1 OS=Homo sapiens GN=KRT1 PE=1 SV=6	15238	66137	498	498	29	29	Homo sapiens	9606	85181	1	1	1	738.375	1474.74	2	1474.74	-0.0059	0	60.4	9.7e-06	K	WELLQQVDTSTR	T					N2_BSA
1	1	K2C1_HUMAN	Keratin, type II cytoskeletal 1 OS=Homo sapiens GN=KRT1 PE=1 SV=6	15238	66137	498	498	29	29	Homo sapiens	9606	85182	1	1	1	738.377	1474.74	2	1474.74	-0.0024	0	60.89	1.1e-05	K	WELLQQVDTSTR	T					NoBSA
1	1	K2C1_HUMAN	Keratin, type II cytoskeletal 1 OS=Homo sapiens GN=KRT1 PE=1 SV=6	15238	66137	498	498	29	29	Homo sapiens	9606	85183	1	1	1	738.377	1474.74	2	1474.74	-0.0019	0	64.86	1.5e-06	K	WELLQQVDTSTR	T					Un_NoBSA
1	1	K2C1_HUMAN	Keratin, type II cytoskeletal 1 OS=Homo sapiens GN=KRT1 PE=1 SV=6	15238	66137	498	498	29	29	Homo sapiens	9606	85184	1	1	1	738.379	1474.74	2	1474.74	0.0013	0	69.35	1.6e-06	K	WELLQQVDTSTR	T					Ar_NoBSA
1	1	K2C1_HUMAN	Keratin, type II cytoskeletal 1 OS=Homo sapiens GN=KRT1 PE=1 SV=6	15238	66137	498	498	29	29	Homo sapiens	9606	85186	1	1	1	738.379	1474.74	2	1474.74	0.0014	0	68.27	9.2e-07	K	WELLQQVDTSTR	T					Un_NoBSA
1	1	K2C1_HUMAN	Keratin, type II cytoskeletal 1 OS=Homo sapiens GN=KRT1 PE=1 SV=6	15238	66137	498	498	29	29	Homo sapiens	9606	85187	1	1	1	738.379	1474.74	2	1474.74	0.0015	0	47.41	0.00018	K	WELLQQVDTSTR	T					BSA
1	1	K2C1_HUMAN	Keratin, type II cytoskeletal 1 OS=Homo sapiens GN=KRT1 PE=1 SV=6	15238	66137	498	498	29	29	Homo sapiens	9606	85188	1	1	1	738.379	1474.74	2	1474.74	0.0016	0	55.32	2.2e-05	K	WELLQQVDTSTR	T					N2_NoBSA
1	1	K2C1_HUMAN	Keratin, type II cytoskeletal 1 OS=Homo sapiens GN=KRT1 PE=1 SV=6	15238	66137	498	498	29	29	Homo sapiens	9606	85189	1	1	1	738.38	1474.75	2	1474.74	0.0035	0	56.16	1.9e-05	K	WELLQQVDTSTR	T					BSA
1	1	K2C1_HUMAN	Keratin, type II cytoskeletal 1 OS=Homo sapiens GN=KRT1 PE=1 SV=6	15238	66137	498	498	29	29	Homo sapiens	9606	85190	1	1	1	738.38	1474.75	2	1474.74	0.0038	0	26.99	0.0029	K	WELLQQVDTSTR	T					Nh3_NoBSA
1	1	K2C1_HUMAN	Keratin, type II cytoskeletal 1 OS=Homo sapiens GN=KRT1 PE=1 SV=6	15238	66137	498	498	29	29	Homo sapiens	9606	85191	1	1	1	738.381	1474.75	2	1474.74	0.0053	0	41.98	0.00082	K	WELLQQVDTSTR	T					Ar_NoBSA
1	1	K2C1_HUMAN	Keratin, type II cytoskeletal 1 OS=Homo sapiens GN=KRT1 PE=1 SV=6	15238	66137	498	498	29	29	Homo sapiens	9606	85192	1	1	1	738.381	1474.75	2	1474.74	0.0058	0	53.39	9.9e-06	K	WELLQQVDTSTR	T					BSA
1	1	K2C1_HUMAN	Keratin, type II cytoskeletal 1 OS=Homo sapiens GN=KRT1 PE=1 SV=6	15238	66137	498	498	29	29	Homo sapiens	9606	85193	1	1	1	738.381	1474.75	2	1474.74	0.0066	0	50.82	0.0001	K	WELLQQVDTSTR	T					Ar_NoBSA
1	1	K2C1_HUMAN	Keratin, type II cytoskeletal 1 OS=Homo sapiens GN=KRT1 PE=1 SV=6	15238	66137	498	498	29	29	Homo sapiens	9606	85194	1	1	1	738.382	1474.75	2	1474.74	0.0071	0	69.78	8.2e-07	K	WELLQQVDTSTR	T					Nh3_NoBSA
1	1	K2C1_HUMAN	Keratin, type II cytoskeletal 1 OS=Homo sapiens GN=KRT1 PE=1 SV=6	15238	66137	498	498	29	29	Homo sapiens	9606	85195	1	1	1	738.382	1474.75	2	1474.74	0.0076	0	58.54	1.4e-05	K	WELLQQVDTSTR	T					Ar_BSA
1	1	K2C1_HUMAN	Keratin, type II cytoskeletal 1 OS=Homo sapiens GN=KRT1 PE=1 SV=6	15238	66137	498	498	29	29	Homo sapiens	9606	85196	1	1	1	738.382	1474.75	2	1474.74	0.0081	0	62.92	5.9e-06	K	WELLQQVDTSTR	T					N2_NoBSA
1	1	K2C1_HUMAN	Keratin, type II cytoskeletal 1 OS=Homo sapiens GN=KRT1 PE=1 SV=6	15238	66137	498	498	29	29	Homo sapiens	9606	85197	1	1	1	738.382	1474.75	2	1474.74	0.0083	0	63.8	4.2e-06	K	WELLQQVDTSTR	T					N2_BSA
1	1	K2C1_HUMAN	Keratin, type II cytoskeletal 1 OS=Homo sapiens GN=KRT1 PE=1 SV=6	15238	66137	498	498	29	29	Homo sapiens	9606	85198	1	1	1	738.383	1474.75	2	1474.74	0.0102	0	60.86	9.2e-06	K	WELLQQVDTSTR	T					Un_BSA
1	1	K2C1_HUMAN	Keratin, type II cytoskeletal 1 OS=Homo sapiens GN=KRT1 PE=1 SV=6	15238	66137	498	498	29	29	Homo sapiens	9606	85200	1	1	0	738.392	1474.77	2	1474.78	-0.0089	0	65.32	2.2e-06	R	FLEQQNQVLQTK	W					Nh3_NoBSA
1	1	K2C1_HUMAN	Keratin, type II cytoskeletal 1 OS=Homo sapiens GN=KRT1 PE=1 SV=6	15238	66137	498	498	29	29	Homo sapiens	9606	85201	1	1	0	738.393	1474.77	2	1474.78	-0.007	0	70.54	1.2e-06	R	FLEQQNQVLQTK	W					N2_NoBSA
1	1	K2C1_HUMAN	Keratin, type II cytoskeletal 1 OS=Homo sapiens GN=KRT1 PE=1 SV=6	15238	66137	498	498	29	29	Homo sapiens	9606	85202	1	1	0	738.393	1474.77	2	1474.78	-0.0068	0	72.51	6.9e-07	R	FLEQQNQVLQTK	W					NoBSA
1	1	K2C1_HUMAN	Keratin, type II cytoskeletal 1 OS=Homo sapiens GN=KRT1 PE=1 SV=6	15238	66137	498	498	29	29	Homo sapiens	9606	85203	1	1	0	738.394	1474.77	2	1474.78	-0.0038	0	74.88	4.7e-07	R	FLEQQNQVLQTK	W					Nh3_NoBSA
1	1	K2C1_HUMAN	Keratin, type II cytoskeletal 1 OS=Homo sapiens GN=KRT1 PE=1 SV=6	15238	66137	498	498	29	29	Homo sapiens	9606	85204	1	1	0	738.395	1474.77	2	1474.78	-0.0031	0	72.52	7.1e-07	R	FLEQQNQVLQTK	W					Ar_NoBSA
1	1	K2C1_HUMAN	Keratin, type II cytoskeletal 1 OS=Homo sapiens GN=KRT1 PE=1 SV=6	15238	66137	498	498	29	29	Homo sapiens	9606	85205	1	1	0	738.395	1474.78	2	1474.78	-0.0029	0	77.23	3e-07	R	FLEQQNQVLQTK	W					NoBSA
1	1	K2C1_HUMAN	Keratin, type II cytoskeletal 1 OS=Homo sapiens GN=KRT1 PE=1 SV=6	15238	66137	498	498	29	29	Homo sapiens	9606	85206	1	1	0	738.395	1474.78	2	1474.78	-0.0024	0	73.28	5.3e-07	R	FLEQQNQVLQTK	W					BSA
1	1	K2C1_HUMAN	Keratin, type II cytoskeletal 1 OS=Homo sapiens GN=KRT1 PE=1 SV=6	15238	66137	498	498	29	29	Homo sapiens	9606	85208	1	1	0	738.395	1474.78	2	1474.78	-0.0015	0	72.25	6.6e-07	R	FLEQQNQVLQTK	W					BSA
1	1	K2C1_HUMAN	Keratin, type II cytoskeletal 1 OS=Homo sapiens GN=KRT1 PE=1 SV=6	15238	66137	498	498	29	29	Homo sapiens	9606	85209	1	1	0	738.396	1474.78	2	1474.78	-0.0013	0	74.51	4.3e-07	R	FLEQQNQVLQTK	W					Nh3_BSA
1	1	K2C1_HUMAN	Keratin, type II cytoskeletal 1 OS=Homo sapiens GN=KRT1 PE=1 SV=6	15238	66137	498	498	29	29	Homo sapiens	9606	85210	1	1	0	738.396	1474.78	2	1474.78	-0.0006	0	74.9	6e-07	R	FLEQQNQVLQTK	W					Un_BSA
1	1	K2C1_HUMAN	Keratin, type II cytoskeletal 1 OS=Homo sapiens GN=KRT1 PE=1 SV=6	15238	66137	498	498	29	29	Homo sapiens	9606	85211	1	1	0	738.396	1474.78	2	1474.78	0.0004	0	71.76	6.2e-07	R	FLEQQNQVLQTK	W					BSA
1	1	K2C1_HUMAN	Keratin, type II cytoskeletal 1 OS=Homo sapiens GN=KRT1 PE=1 SV=6	15238	66137	498	498	29	29	Homo sapiens	9606	85212	1	1	0	738.397	1474.78	2	1474.78	0.0006	0	72.47	7.3e-07	R	FLEQQNQVLQTK	W					Nh3_NoBSA
1	1	K2C1_HUMAN	Keratin, type II cytoskeletal 1 OS=Homo sapiens GN=KRT1 PE=1 SV=6	15238	66137	498	498	29	29	Homo sapiens	9606	85213	1	1	0	738.397	1474.78	2	1474.78	0.0006	0	75.11	4.7e-07	R	FLEQQNQVLQTK	W					Un_BSA
1	1	K2C1_HUMAN	Keratin, type II cytoskeletal 1 OS=Homo sapiens GN=KRT1 PE=1 SV=6	15238	66137	498	498	29	29	Homo sapiens	9606	85214	1	1	0	738.397	1474.78	2	1474.78	0.0008	0	64.71	2.7e-06	R	FLEQQNQVLQTK	W					N2_BSA
1	1	K2C1_HUMAN	Keratin, type II cytoskeletal 1 OS=Homo sapiens GN=KRT1 PE=1 SV=6	15238	66137	498	498	29	29	Homo sapiens	9606	85215	1	1	0	738.397	1474.78	2	1474.78	0.0009	0	76.72	1.8e-07	R	FLEQQNQVLQTK	W					Un_BSA
1	1	K2C1_HUMAN	Keratin, type II cytoskeletal 1 OS=Homo sapiens GN=KRT1 PE=1 SV=6	15238	66137	498	498	29	29	Homo sapiens	9606	85216	1	1	0	738.397	1474.78	2	1474.78	0.0012	0	65.92	2.1e-06	R	FLEQQNQVLQTK	W					Ar_BSA
1	1	K2C1_HUMAN	Keratin, type II cytoskeletal 1 OS=Homo sapiens GN=KRT1 PE=1 SV=6	15238	66137	498	498	29	29	Homo sapiens	9606	85217	1	1	0	738.397	1474.78	2	1474.78	0.0015	0	69.58	9.6e-07	R	FLEQQNQVLQTK	W					N2_BSA
1	1	K2C1_HUMAN	Keratin, type II cytoskeletal 1 OS=Homo sapiens GN=KRT1 PE=1 SV=6	15238	66137	498	498	29	29	Homo sapiens	9606	85218	1	1	0	738.397	1474.78	2	1474.78	0.0022	0	71.67	8.2e-07	R	FLEQQNQVLQTK	W					Un_BSA
1	1	K2C1_HUMAN	Keratin, type II cytoskeletal 1 OS=Homo sapiens GN=KRT1 PE=1 SV=6	15238	66137	498	498	29	29	Homo sapiens	9606	85219	1	1	0	738.398	1474.78	2	1474.78	0.0039	0	51.72	8.3e-05	R	FLEQQNQVLQTK	W					Un_NoBSA
1	1	K2C1_HUMAN	Keratin, type II cytoskeletal 1 OS=Homo sapiens GN=KRT1 PE=1 SV=6	15238	66137	498	498	29	29	Homo sapiens	9606	85220	1	1	0	738.398	1474.78	2	1474.78	0.0039	0	69.95	1.1e-06	R	FLEQQNQVLQTK	W					BSA
1	1	K2C1_HUMAN	Keratin, type II cytoskeletal 1 OS=Homo sapiens GN=KRT1 PE=1 SV=6	15238	66137	498	498	29	29	Homo sapiens	9606	85221	1	1	0	738.398	1474.78	2	1474.78	0.004	0	60.84	2.6e-05	R	FLEQQNQVLQTK	W					Un_NoBSA
1	1	K2C1_HUMAN	Keratin, type II cytoskeletal 1 OS=Homo sapiens GN=KRT1 PE=1 SV=6	15238	66137	498	498	29	29	Homo sapiens	9606	85222	1	1	0	738.398	1474.78	2	1474.78	0.0043	0	74.96	4.2e-07	R	FLEQQNQVLQTK	W					N2_NoBSA
1	1	K2C1_HUMAN	Keratin, type II cytoskeletal 1 OS=Homo sapiens GN=KRT1 PE=1 SV=6	15238	66137	498	498	29	29	Homo sapiens	9606	85223	1	1	0	738.399	1474.78	2	1474.78	0.0044	0	51.32	8.2e-05	R	FLEQQNQVLQTK	W					Un_NoBSA
1	1	K2C1_HUMAN	Keratin, type II cytoskeletal 1 OS=Homo sapiens GN=KRT1 PE=1 SV=6	15238	66137	498	498	29	29	Homo sapiens	9606	85224	1	1	0	738.399	1474.78	2	1474.78	0.0045	0	71.79	8.5e-07	R	FLEQQNQVLQTK	W					N2_NoBSA
1	1	K2C1_HUMAN	Keratin, type II cytoskeletal 1 OS=Homo sapiens GN=KRT1 PE=1 SV=6	15238	66137	498	498	29	29	Homo sapiens	9606	85225	1	1	0	738.399	1474.78	2	1474.78	0.0046	0	72.52	9.5e-07	R	FLEQQNQVLQTK	W					Ar_NoBSA
1	1	K2C1_HUMAN	Keratin, type II cytoskeletal 1 OS=Homo sapiens GN=KRT1 PE=1 SV=6	15238	66137	498	498	29	29	Homo sapiens	9606	85226	1	1	0	738.399	1474.78	2	1474.78	0.0047	0	72.21	8.2e-07	R	FLEQQNQVLQTK	W					Nh3_BSA
1	1	K2C1_HUMAN	Keratin, type II cytoskeletal 1 OS=Homo sapiens GN=KRT1 PE=1 SV=6	15238	66137	498	498	29	29	Homo sapiens	9606	85227	1	1	0	738.399	1474.78	2	1474.78	0.0051	0	68.74	7.7e-07	R	FLEQQNQVLQTK	W					Ar_NoBSA
1	1	K2C1_HUMAN	Keratin, type II cytoskeletal 1 OS=Homo sapiens GN=KRT1 PE=1 SV=6	15238	66137	498	498	29	29	Homo sapiens	9606	85229	1	1	0	738.399	1474.78	2	1474.78	0.0053	0	72.73	7.5e-07	R	FLEQQNQVLQTK	W					Ar_BSA
1	1	K2C1_HUMAN	Keratin, type II cytoskeletal 1 OS=Homo sapiens GN=KRT1 PE=1 SV=6	15238	66137	498	498	29	29	Homo sapiens	9606	85230	1	1	0	738.399	1474.78	2	1474.78	0.0053	0	77.3	2.7e-07	R	FLEQQNQVLQTK	W					N2_BSA
1	1	K2C1_HUMAN	Keratin, type II cytoskeletal 1 OS=Homo sapiens GN=KRT1 PE=1 SV=6	15238	66137	498	498	29	29	Homo sapiens	9606	85231	1	1	0	738.4	1474.79	2	1474.78	0.0078	0	81.07	5.1e-08	R	FLEQQNQVLQTK	W					Un_NoBSA
1	1	K2C1_HUMAN	Keratin, type II cytoskeletal 1 OS=Homo sapiens GN=KRT1 PE=1 SV=6	15238	66137	498	498	29	29	Homo sapiens	9606	85232	1	1	0	738.401	1474.79	2	1474.78	0.0099	0	72.51	3.7e-07	R	FLEQQNQVLQTK	W					Ar_BSA
1	1	K2C1_HUMAN	Keratin, type II cytoskeletal 1 OS=Homo sapiens GN=KRT1 PE=1 SV=6	15238	66137	498	498	29	29	Homo sapiens	9606	85233	1	1	0	738.402	1474.79	2	1474.78	0.0104	0	65.9	8.3e-06	R	FLEQQNQVLQTK	W					BSA
1	1	K2C1_HUMAN	Keratin, type II cytoskeletal 1 OS=Homo sapiens GN=KRT1 PE=1 SV=6	15238	66137	498	498	29	29	Homo sapiens	9606	85234	1	1	0	738.402	1474.79	2	1474.78	0.011	0	76.62	4.3e-07	R	FLEQQNQVLQTK	W					Nh3_BSA
1	1	K2C1_HUMAN	Keratin, type II cytoskeletal 1 OS=Homo sapiens GN=KRT1 PE=1 SV=6	15238	66137	498	498	29	29	Homo sapiens	9606	85303	1	1	0	738.884	1475.75	2	1475.76	-0.0085	0	40.08	0.00017	R	FLEQQNQVLQTK	W	Deamidated (NQ)	0.000010000000.0			Nh3_BSA
1	1	K2C1_HUMAN	Keratin, type II cytoskeletal 1 OS=Homo sapiens GN=KRT1 PE=1 SV=6	15238	66137	498	498	29	29	Homo sapiens	9606	85304	1	1	0	738.884	1475.75	2	1475.76	-0.0077	0	52.34	5.3e-05	R	FLEQQNQVLQTK	W	Deamidated (NQ)	0.000100000000.0			Ar_NoBSA
1	1	K2C1_HUMAN	Keratin, type II cytoskeletal 1 OS=Homo sapiens GN=KRT1 PE=1 SV=6	15238	66137	498	498	29	29	Homo sapiens	9606	85307	1	1	0	738.885	1475.75	2	1475.76	-0.0071	0	53.38	4.1e-05	R	FLEQQNQVLQTK	W	Deamidated (NQ)	0.000100000000.0			Nh3_NoBSA
1	1	K2C1_HUMAN	Keratin, type II cytoskeletal 1 OS=Homo sapiens GN=KRT1 PE=1 SV=6	15238	66137	498	498	29	29	Homo sapiens	9606	85308	1	1	0	738.886	1475.76	2	1475.76	-0.0045	0	71.37	3.4e-06	R	FLEQQNQVLQTK	W	Deamidated (NQ)	0.000000100000.0			Nh3_BSA
1	1	K2C1_HUMAN	Keratin, type II cytoskeletal 1 OS=Homo sapiens GN=KRT1 PE=1 SV=6	15238	66137	498	498	29	29	Homo sapiens	9606	123782	1	1	0	738.887	1475.76	2	1475.76	-0.0034	0	33.41	0.0016	R	FLEQQNQVLQTK	W	Deamidated (NQ)	0.000000000100.0			N2_NoBSA
1	1	K2C1_HUMAN	Keratin, type II cytoskeletal 1 OS=Homo sapiens GN=KRT1 PE=1 SV=6	15238	66137	498	498	29	29	Homo sapiens	9606	85310	1	1	0	738.887	1475.76	2	1475.76	-0.0027	0	62.68	1.6e-05	R	FLEQQNQVLQTK	W	Deamidated (NQ)	0.000010000000.0			Ar_BSA
1	1	K2C1_HUMAN	Keratin, type II cytoskeletal 1 OS=Homo sapiens GN=KRT1 PE=1 SV=6	15238	66137	498	498	29	29	Homo sapiens	9606	85311	1	1	0	738.887	1475.76	2	1475.76	-0.0021	0	50.19	0.00038	R	FLEQQNQVLQTK	W	Deamidated (NQ)	0.000010000000.0			BSA
1	1	K2C1_HUMAN	Keratin, type II cytoskeletal 1 OS=Homo sapiens GN=KRT1 PE=1 SV=6	15238	66137	498	498	29	29	Homo sapiens	9606	85312	1	1	0	738.888	1475.76	2	1475.76	-0.0016	0	67.75	6.9e-06	R	FLEQQNQVLQTK	W	Deamidated (NQ)	0.000100000000.0			Un_NoBSA
1	1	K2C1_HUMAN	Keratin, type II cytoskeletal 1 OS=Homo sapiens GN=KRT1 PE=1 SV=6	15238	66137	498	498	29	29	Homo sapiens	9606	85315	1	1	0	738.888	1475.76	2	1475.76	-0.0008	0	36.09	0.0014	R	FLEQQNQVLQTK	W	Deamidated (NQ)	0.000010000000.0			BSA
1	1	K2C1_HUMAN	Keratin, type II cytoskeletal 1 OS=Homo sapiens GN=KRT1 PE=1 SV=6	15238	66137	498	498	29	29	Homo sapiens	9606	123708	1	1	0	738.889	1475.76	2	1475.76	0.0005	0	50.7	0.00025	R	FLEQQNQVLQTK	W	Deamidated (NQ)	0.000100000000.0			Un_NoBSA
1	1	K2C1_HUMAN	Keratin, type II cytoskeletal 1 OS=Homo sapiens GN=KRT1 PE=1 SV=6	15238	66137	498	498	29	29	Homo sapiens	9606	123705	1	1	0	738.889	1475.76	2	1475.76	0.0014	0	44.96	0.00017	R	FLEQQNQVLQTK	W	Deamidated (NQ)	0.000000000100.0			N2_NoBSA
1	1	K2C1_HUMAN	Keratin, type II cytoskeletal 1 OS=Homo sapiens GN=KRT1 PE=1 SV=6	15238	66137	498	498	29	29	Homo sapiens	9606	85316	1	1	0	738.889	1475.76	2	1475.76	0.0015	0	56.63	4.7e-05	R	FLEQQNQVLQTK	W	Deamidated (NQ)	0.000010000000.0			BSA
1	1	K2C1_HUMAN	Keratin, type II cytoskeletal 1 OS=Homo sapiens GN=KRT1 PE=1 SV=6	15238	66137	498	498	29	29	Homo sapiens	9606	85317	1	1	0	738.889	1475.76	2	1475.76	0.0019	0	47.29	0.00012	R	FLEQQNQVLQTK	W	Deamidated (NQ)	0.000100000000.0			N2_NoBSA
1	1	K2C1_HUMAN	Keratin, type II cytoskeletal 1 OS=Homo sapiens GN=KRT1 PE=1 SV=6	15238	66137	498	498	29	29	Homo sapiens	9606	85318	1	1	0	738.894	1475.77	2	1475.76	0.0105	0	28.12	0.0026	R	FLEQQNQVLQTK	W	Deamidated (NQ)	0.000010000000.0			N2_NoBSA
1	1	K2C1_HUMAN	Keratin, type II cytoskeletal 1 OS=Homo sapiens GN=KRT1 PE=1 SV=6	15238	66137	498	498	29	29	Homo sapiens	9606	123773	1	1	0	738.894	1475.77	2	1475.76	0.011	0	38.7	0.0031	R	FLEQQNQVLQTK	W	Deamidated (NQ)	0.000010000000.0			Nh3_BSA
1	1	K2C1_HUMAN	Keratin, type II cytoskeletal 1 OS=Homo sapiens GN=KRT1 PE=1 SV=6	15238	66137	498	498	29	29	Homo sapiens	9606	85320	1	1	0	738.895	1475.78	2	1475.76	0.0146	0	37.04	0.00063	R	FLEQQNQVLQTK	W	Deamidated (NQ)	0.000010000000.0			Un_BSA
1	1	K2C1_HUMAN	Keratin, type II cytoskeletal 1 OS=Homo sapiens GN=KRT1 PE=1 SV=6	15238	66137	498	498	29	29	Homo sapiens	9606	88935	1	1	0	762.399	1522.78	2	1522.78	0.003	1	21.89	0.0088	R	LLRDYQELMNTK	L					Un_NoBSA
1	1	K2C1_HUMAN	Keratin, type II cytoskeletal 1 OS=Homo sapiens GN=KRT1 PE=1 SV=6	15238	66137	498	498	29	29	Homo sapiens	9606	90147	1	1	0	770.393	1538.77	2	1538.78	-0.0046	1	41.69	0.00026	R	LLRDYQELMNTK	L	Oxidation (M)	0.000000002000.0			Ar_BSA
1	1	K2C1_HUMAN	Keratin, type II cytoskeletal 1 OS=Homo sapiens GN=KRT1 PE=1 SV=6	15238	66137	498	498	29	29	Homo sapiens	9606	90148	1	1	0	770.394	1538.77	2	1538.78	-0.0027	1	29.6	0.0017	R	LLRDYQELMNTK	L	Oxidation (M)	0.000000002000.0			Ar_BSA
1	1	K2C1_HUMAN	Keratin, type II cytoskeletal 1 OS=Homo sapiens GN=KRT1 PE=1 SV=6	15238	66137	498	498	29	29	Homo sapiens	9606	90151	1	1	0	770.394	1538.77	2	1538.78	-0.0024	1	42.14	0.00016	R	LLRDYQELMNTK	L	Oxidation (M)	0.000000002000.0			BSA
1	1	K2C1_HUMAN	Keratin, type II cytoskeletal 1 OS=Homo sapiens GN=KRT1 PE=1 SV=6	15238	66137	498	498	29	29	Homo sapiens	9606	90155	1	1	0	770.394	1538.77	2	1538.78	-0.0019	1	38.47	0.0011	R	LLRDYQELMNTK	L	Oxidation (M)	0.000000002000.0			N2_BSA
1	1	K2C1_HUMAN	Keratin, type II cytoskeletal 1 OS=Homo sapiens GN=KRT1 PE=1 SV=6	15238	66137	498	498	29	29	Homo sapiens	9606	90156	1	1	0	770.395	1538.78	2	1538.78	-0.0013	1	42.96	0.00012	R	LLRDYQELMNTK	L	Oxidation (M)	0.000000002000.0			Un_NoBSA
1	1	K2C1_HUMAN	Keratin, type II cytoskeletal 1 OS=Homo sapiens GN=KRT1 PE=1 SV=6	15238	66137	498	498	29	29	Homo sapiens	9606	90157	1	1	0	770.395	1538.78	2	1538.78	-0.001	1	49.51	5.4e-05	R	LLRDYQELMNTK	L	Oxidation (M)	0.000000002000.0			N2_NoBSA
1	1	K2C1_HUMAN	Keratin, type II cytoskeletal 1 OS=Homo sapiens GN=KRT1 PE=1 SV=6	15238	66137	498	498	29	29	Homo sapiens	9606	90158	1	1	0	770.395	1538.78	2	1538.78	-0.0007	1	44.74	0.00023	R	LLRDYQELMNTK	L	Oxidation (M)	0.000000002000.0			Nh3_NoBSA
1	1	K2C1_HUMAN	Keratin, type II cytoskeletal 1 OS=Homo sapiens GN=KRT1 PE=1 SV=6	15238	66137	498	498	29	29	Homo sapiens	9606	90161	1	1	0	770.395	1538.78	2	1538.78	0	1	54.31	1.6e-05	R	LLRDYQELMNTK	L	Oxidation (M)	0.000000002000.0			Un_NoBSA
1	1	K2C1_HUMAN	Keratin, type II cytoskeletal 1 OS=Homo sapiens GN=KRT1 PE=1 SV=6	15238	66137	498	498	29	29	Homo sapiens	9606	90162	1	1	0	770.396	1538.78	2	1538.78	0.001	1	48.96	0.00012	R	LLRDYQELMNTK	L	Oxidation (M)	0.000000002000.0			NoBSA
1	1	K2C1_HUMAN	Keratin, type II cytoskeletal 1 OS=Homo sapiens GN=KRT1 PE=1 SV=6	15238	66137	498	498	29	29	Homo sapiens	9606	90165	1	1	0	770.396	1538.78	2	1538.78	0.0015	1	53.17	1.9e-05	R	LLRDYQELMNTK	L	Oxidation (M)	0.000000002000.0			N2_NoBSA
1	1	K2C1_HUMAN	Keratin, type II cytoskeletal 1 OS=Homo sapiens GN=KRT1 PE=1 SV=6	15238	66137	498	498	29	29	Homo sapiens	9606	90166	1	1	0	770.396	1538.78	2	1538.78	0.0015	1	38.43	0.00036	R	LLRDYQELMNTK	L	Oxidation (M)	0.000000002000.0			N2_BSA
1	1	K2C1_HUMAN	Keratin, type II cytoskeletal 1 OS=Homo sapiens GN=KRT1 PE=1 SV=6	15238	66137	498	498	29	29	Homo sapiens	9606	90171	1	1	0	770.396	1538.78	2	1538.78	0.002	1	34.12	0.00099	R	LLRDYQELMNTK	L	Oxidation (M)	0.000000002000.0			Nh3_NoBSA
1	1	K2C1_HUMAN	Keratin, type II cytoskeletal 1 OS=Homo sapiens GN=KRT1 PE=1 SV=6	15238	66137	498	498	29	29	Homo sapiens	9606	90172	1	1	0	770.396	1538.78	2	1538.78	0.0021	1	42.18	0.00043	R	LLRDYQELMNTK	L	Oxidation (M)	0.000000002000.0			BSA
1	1	K2C1_HUMAN	Keratin, type II cytoskeletal 1 OS=Homo sapiens GN=KRT1 PE=1 SV=6	15238	66137	498	498	29	29	Homo sapiens	9606	90173	1	1	0	770.397	1538.78	2	1538.78	0.0024	1	42.85	0.00059	R	LLRDYQELMNTK	L	Oxidation (M)	0.000000002000.0			BSA
1	1	K2C1_HUMAN	Keratin, type II cytoskeletal 1 OS=Homo sapiens GN=KRT1 PE=1 SV=6	15238	66137	498	498	29	29	Homo sapiens	9606	90176	1	1	0	770.397	1538.78	2	1538.78	0.0029	1	62.35	5.8e-06	R	LLRDYQELMNTK	L	Oxidation (M)	0.000000002000.0			Ar_BSA
1	1	K2C1_HUMAN	Keratin, type II cytoskeletal 1 OS=Homo sapiens GN=KRT1 PE=1 SV=6	15238	66137	498	498	29	29	Homo sapiens	9606	90177	1	1	0	770.397	1538.78	2	1538.78	0.003	1	51.05	3.4e-05	R	LLRDYQELMNTK	L	Oxidation (M)	0.000000002000.0			Un_BSA
1	1	K2C1_HUMAN	Keratin, type II cytoskeletal 1 OS=Homo sapiens GN=KRT1 PE=1 SV=6	15238	66137	498	498	29	29	Homo sapiens	9606	90178	1	1	0	770.397	1538.78	2	1538.78	0.0033	1	52.76	4.4e-05	R	LLRDYQELMNTK	L	Oxidation (M)	0.000000002000.0			Nh3_NoBSA
1	1	K2C1_HUMAN	Keratin, type II cytoskeletal 1 OS=Homo sapiens GN=KRT1 PE=1 SV=6	15238	66137	498	498	29	29	Homo sapiens	9606	90179	1	1	0	770.397	1538.78	2	1538.78	0.0037	1	53.47	2.4e-05	R	LLRDYQELMNTK	L	Oxidation (M)	0.000000002000.0			Ar_NoBSA
1	1	K2C1_HUMAN	Keratin, type II cytoskeletal 1 OS=Homo sapiens GN=KRT1 PE=1 SV=6	15238	66137	498	498	29	29	Homo sapiens	9606	90180	1	1	0	770.397	1538.78	2	1538.78	0.0039	1	38.93	0.00034	R	LLRDYQELMNTK	L	Oxidation (M)	0.000000002000.0			Un_NoBSA
1	1	K2C1_HUMAN	Keratin, type II cytoskeletal 1 OS=Homo sapiens GN=KRT1 PE=1 SV=6	15238	66137	498	498	29	29	Homo sapiens	9606	90185	1	1	0	770.398	1538.78	2	1538.78	0.005	1	42.72	0.00023	R	LLRDYQELMNTK	L	Oxidation (M)	0.000000002000.0			Nh3_BSA
1	1	K2C1_HUMAN	Keratin, type II cytoskeletal 1 OS=Homo sapiens GN=KRT1 PE=1 SV=6	15238	66137	498	498	29	29	Homo sapiens	9606	90186	1	1	0	770.398	1538.78	2	1538.78	0.005	1	31.39	0.0048	R	LLRDYQELMNTK	L	Oxidation (M)	0.000000002000.0			NoBSA
1	1	K2C1_HUMAN	Keratin, type II cytoskeletal 1 OS=Homo sapiens GN=KRT1 PE=1 SV=6	15238	66137	498	498	29	29	Homo sapiens	9606	90187	1	1	0	770.398	1538.78	2	1538.78	0.0058	1	40.65	0.00021	R	LLRDYQELMNTK	L	Oxidation (M)	0.000000002000.0			Un_BSA
1	1	K2C1_HUMAN	Keratin, type II cytoskeletal 1 OS=Homo sapiens GN=KRT1 PE=1 SV=6	15238	66137	498	498	29	29	Homo sapiens	9606	90190	1	1	0	770.399	1538.78	2	1538.78	0.0078	1	41.19	0.00055	R	LLRDYQELMNTK	L	Oxidation (M)	0.000000002000.0			Ar_NoBSA
1	1	K2C1_HUMAN	Keratin, type II cytoskeletal 1 OS=Homo sapiens GN=KRT1 PE=1 SV=6	15238	66137	498	498	29	29	Homo sapiens	9606	90191	1	1	0	770.399	1538.78	2	1538.78	0.0078	1	44.95	0.0011	R	LLRDYQELMNTK	L	Oxidation (M)	0.000000002000.0			Ar_BSA
1	1	K2C1_HUMAN	Keratin, type II cytoskeletal 1 OS=Homo sapiens GN=KRT1 PE=1 SV=6	15238	66137	498	498	29	29	Homo sapiens	9606	90197	1	1	0	770.4	1538.79	2	1538.78	0.0092	1	50.51	2.1e-05	R	LLRDYQELMNTK	L	Oxidation (M)	0.000000002000.0			BSA
1	1	K2C1_HUMAN	Keratin, type II cytoskeletal 1 OS=Homo sapiens GN=KRT1 PE=1 SV=6	15238	66137	498	498	29	29	Homo sapiens	9606	90199	1	1	0	770.401	1538.79	2	1538.78	0.011	1	32.99	0.0064	R	LLRDYQELMNTK	L	Oxidation (M)	0.000000002000.0			Nh3_BSA
1	1	K2C1_HUMAN	Keratin, type II cytoskeletal 1 OS=Homo sapiens GN=KRT1 PE=1 SV=6	15238	66137	498	498	29	29	Homo sapiens	9606	90200	1	1	0	770.401	1538.79	2	1538.78	0.0113	1	43.57	0.00036	R	LLRDYQELMNTK	L	Oxidation (M)	0.000000002000.0			N2_NoBSA
1	1	K2C1_HUMAN	Keratin, type II cytoskeletal 1 OS=Homo sapiens GN=KRT1 PE=1 SV=6	15238	66137	498	498	29	29	Homo sapiens	9606	95670	1	1	1	800.413	1598.81	2	1598.83	-0.0158	1	65.21	7.7e-07	K	NKLNDLEDALQQAK	E					BSA
1	1	K2C1_HUMAN	Keratin, type II cytoskeletal 1 OS=Homo sapiens GN=KRT1 PE=1 SV=6	15238	66137	498	498	29	29	Homo sapiens	9606	95671	1	1	1	800.413	1598.81	2	1598.83	-0.0153	1	38.36	0.00025	K	NKLNDLEDALQQAK	E					Un_BSA
1	1	K2C1_HUMAN	Keratin, type II cytoskeletal 1 OS=Homo sapiens GN=KRT1 PE=1 SV=6	15238	66137	498	498	29	29	Homo sapiens	9606	95672	1	1	1	800.413	1598.81	2	1598.83	-0.0147	1	56.59	1.2e-05	K	NKLNDLEDALQQAK	E					NoBSA
1	1	K2C1_HUMAN	Keratin, type II cytoskeletal 1 OS=Homo sapiens GN=KRT1 PE=1 SV=6	15238	66137	498	498	29	29	Homo sapiens	9606	95673	1	1	1	800.413	1598.81	2	1598.83	-0.0141	1	67.98	4.2e-07	K	NKLNDLEDALQQAK	E					Un_NoBSA
1	1	K2C1_HUMAN	Keratin, type II cytoskeletal 1 OS=Homo sapiens GN=KRT1 PE=1 SV=6	15238	66137	498	498	29	29	Homo sapiens	9606	95674	1	1	1	800.414	1598.81	2	1598.83	-0.0133	1	70.46	7e-07	K	NKLNDLEDALQQAK	E					BSA
1	1	K2C1_HUMAN	Keratin, type II cytoskeletal 1 OS=Homo sapiens GN=KRT1 PE=1 SV=6	15238	66137	498	498	29	29	Homo sapiens	9606	95675	1	1	1	800.414	1598.81	2	1598.83	-0.0127	1	54.94	8.8e-06	K	NKLNDLEDALQQAK	E					Nh3_NoBSA
1	1	K2C1_HUMAN	Keratin, type II cytoskeletal 1 OS=Homo sapiens GN=KRT1 PE=1 SV=6	15238	66137	498	498	29	29	Homo sapiens	9606	95676	1	1	1	800.415	1598.82	2	1598.83	-0.0109	1	24.29	0.0064	K	NKLNDLEDALQQAK	E					NoBSA
1	1	K2C1_HUMAN	Keratin, type II cytoskeletal 1 OS=Homo sapiens GN=KRT1 PE=1 SV=6	15238	66137	498	498	29	29	Homo sapiens	9606	95677	1	1	1	800.416	1598.82	2	1598.83	-0.0089	1	50.14	2e-05	K	NKLNDLEDALQQAK	E					N2_BSA
1	1	K2C1_HUMAN	Keratin, type II cytoskeletal 1 OS=Homo sapiens GN=KRT1 PE=1 SV=6	15238	66137	498	498	29	29	Homo sapiens	9606	95678	1	1	1	800.417	1598.82	2	1598.83	-0.0073	1	72.86	9.1e-07	K	NKLNDLEDALQQAK	E					Ar_NoBSA
1	1	K2C1_HUMAN	Keratin, type II cytoskeletal 1 OS=Homo sapiens GN=KRT1 PE=1 SV=6	15238	66137	498	498	29	29	Homo sapiens	9606	95679	1	1	1	800.417	1598.82	2	1598.83	-0.0066	1	39.47	0.0002	K	NKLNDLEDALQQAK	E					Nh3_BSA
1	1	K2C1_HUMAN	Keratin, type II cytoskeletal 1 OS=Homo sapiens GN=KRT1 PE=1 SV=6	15238	66137	498	498	29	29	Homo sapiens	9606	95680	1	1	1	800.417	1598.82	2	1598.83	-0.0065	1	62.36	1.6e-05	K	NKLNDLEDALQQAK	E					N2_BSA
1	1	K2C1_HUMAN	Keratin, type II cytoskeletal 1 OS=Homo sapiens GN=KRT1 PE=1 SV=6	15238	66137	498	498	29	29	Homo sapiens	9606	95681	1	1	1	800.417	1598.82	2	1598.83	-0.0062	1	54.31	1.7e-05	K	NKLNDLEDALQQAK	E					Un_NoBSA
1	1	K2C1_HUMAN	Keratin, type II cytoskeletal 1 OS=Homo sapiens GN=KRT1 PE=1 SV=6	15238	66137	498	498	29	29	Homo sapiens	9606	95682	1	1	1	800.418	1598.82	2	1598.83	-0.0053	1	35.77	0.00044	K	NKLNDLEDALQQAK	E					Ar_BSA
1	1	K2C1_HUMAN	Keratin, type II cytoskeletal 1 OS=Homo sapiens GN=KRT1 PE=1 SV=6	15238	66137	498	498	29	29	Homo sapiens	9606	95683	1	1	1	800.418	1598.82	2	1598.83	-0.0049	1	54.95	0.00011	K	NKLNDLEDALQQAK	E					Ar_BSA
1	1	K2C1_HUMAN	Keratin, type II cytoskeletal 1 OS=Homo sapiens GN=KRT1 PE=1 SV=6	15238	66137	498	498	29	29	Homo sapiens	9606	95685	1	1	1	800.418	1598.82	2	1598.83	-0.0045	1	76.49	6.9e-07	K	NKLNDLEDALQQAK	E					Nh3_NoBSA
1	1	K2C1_HUMAN	Keratin, type II cytoskeletal 1 OS=Homo sapiens GN=KRT1 PE=1 SV=6	15238	66137	498	498	29	29	Homo sapiens	9606	95686	1	1	1	800.419	1598.82	2	1598.83	-0.0029	1	70.65	1.9e-06	K	NKLNDLEDALQQAK	E					BSA
1	1	K2C1_HUMAN	Keratin, type II cytoskeletal 1 OS=Homo sapiens GN=KRT1 PE=1 SV=6	15238	66137	498	498	29	29	Homo sapiens	9606	95688	1	1	1	800.423	1598.83	2	1598.83	0.0042	1	54.72	2.7e-05	K	NKLNDLEDALQQAK	E					Un_BSA
1	1	K2C1_HUMAN	Keratin, type II cytoskeletal 1 OS=Homo sapiens GN=KRT1 PE=1 SV=6	15238	66137	498	498	29	29	Homo sapiens	9606	99213	1	1	1	819.926	1637.84	2	1637.85	-0.0157	1	61.21	1.9e-05	K	SLNNQFASFIDKVR	F					Un_NoBSA
1	1	K2C1_HUMAN	Keratin, type II cytoskeletal 1 OS=Homo sapiens GN=KRT1 PE=1 SV=6	15238	66137	498	498	29	29	Homo sapiens	9606	99214	1	1	1	819.926	1637.84	2	1637.85	-0.0156	1	59.43	6.1e-06	K	SLNNQFASFIDKVR	F					N2_NoBSA
1	1	K2C1_HUMAN	Keratin, type II cytoskeletal 1 OS=Homo sapiens GN=KRT1 PE=1 SV=6	15238	66137	498	498	29	29	Homo sapiens	9606	99215	1	1	1	819.926	1637.84	2	1637.85	-0.0152	1	85.09	1.1e-07	K	SLNNQFASFIDKVR	F					BSA
1	1	K2C1_HUMAN	Keratin, type II cytoskeletal 1 OS=Homo sapiens GN=KRT1 PE=1 SV=6	15238	66137	498	498	29	29	Homo sapiens	9606	99216	1	1	1	819.926	1637.84	2	1637.85	-0.0145	1	55.72	2.2e-05	K	SLNNQFASFIDKVR	F					Un_BSA
1	1	K2C1_HUMAN	Keratin, type II cytoskeletal 1 OS=Homo sapiens GN=KRT1 PE=1 SV=6	15238	66137	498	498	29	29	Homo sapiens	9606	99217	1	1	1	819.927	1637.84	2	1637.85	-0.014	1	65.71	9.9e-06	K	SLNNQFASFIDKVR	F					Nh3_BSA
1	1	K2C1_HUMAN	Keratin, type II cytoskeletal 1 OS=Homo sapiens GN=KRT1 PE=1 SV=6	15238	66137	498	498	29	29	Homo sapiens	9606	99218	1	1	1	819.927	1637.84	2	1637.85	-0.0127	1	67.89	3.9e-06	K	SLNNQFASFIDKVR	F					Nh3_NoBSA
1	1	K2C1_HUMAN	Keratin, type II cytoskeletal 1 OS=Homo sapiens GN=KRT1 PE=1 SV=6	15238	66137	498	498	29	29	Homo sapiens	9606	99219	1	1	1	819.928	1637.84	2	1637.85	-0.0121	1	52.69	2.7e-05	K	SLNNQFASFIDKVR	F					Ar_NoBSA
1	1	K2C1_HUMAN	Keratin, type II cytoskeletal 1 OS=Homo sapiens GN=KRT1 PE=1 SV=6	15238	66137	498	498	29	29	Homo sapiens	9606	99220	1	1	1	819.928	1637.84	2	1637.85	-0.0119	1	56.89	4.6e-06	K	SLNNQFASFIDKVR	F					Un_BSA
1	1	K2C1_HUMAN	Keratin, type II cytoskeletal 1 OS=Homo sapiens GN=KRT1 PE=1 SV=6	15238	66137	498	498	29	29	Homo sapiens	9606	99223	1	1	1	819.928	1637.84	2	1637.85	-0.01	1	69.51	4.8e-07	K	SLNNQFASFIDKVR	F					Ar_NoBSA
1	1	K2C1_HUMAN	Keratin, type II cytoskeletal 1 OS=Homo sapiens GN=KRT1 PE=1 SV=6	15238	66137	498	498	29	29	Homo sapiens	9606	99224	1	1	1	819.929	1637.84	2	1637.85	-0.0094	1	76.98	5.9e-07	K	SLNNQFASFIDKVR	F					N2_NoBSA
1	1	K2C1_HUMAN	Keratin, type II cytoskeletal 1 OS=Homo sapiens GN=KRT1 PE=1 SV=6	15238	66137	498	498	29	29	Homo sapiens	9606	99225	1	1	1	819.929	1637.84	2	1637.85	-0.009	1	65.91	6.5e-06	K	SLNNQFASFIDKVR	F					N2_NoBSA
1	1	K2C1_HUMAN	Keratin, type II cytoskeletal 1 OS=Homo sapiens GN=KRT1 PE=1 SV=6	15238	66137	498	498	29	29	Homo sapiens	9606	99226	1	1	1	819.929	1637.84	2	1637.85	-0.0087	1	90.44	3e-08	K	SLNNQFASFIDKVR	F					Ar_BSA
1	1	K2C1_HUMAN	Keratin, type II cytoskeletal 1 OS=Homo sapiens GN=KRT1 PE=1 SV=6	15238	66137	498	498	29	29	Homo sapiens	9606	99228	1	1	1	819.929	1637.84	2	1637.85	-0.0086	1	67.41	4.4e-06	K	SLNNQFASFIDKVR	F					Nh3_NoBSA
1	1	K2C1_HUMAN	Keratin, type II cytoskeletal 1 OS=Homo sapiens GN=KRT1 PE=1 SV=6	15238	66137	498	498	29	29	Homo sapiens	9606	99230	1	1	1	819.929	1637.84	2	1637.85	-0.008	1	53.03	2.9e-05	K	SLNNQFASFIDKVR	F					Un_NoBSA
1	1	K2C1_HUMAN	Keratin, type II cytoskeletal 1 OS=Homo sapiens GN=KRT1 PE=1 SV=6	15238	66137	498	498	29	29	Homo sapiens	9606	99231	1	1	1	819.93	1637.84	2	1637.85	-0.0077	1	43.7	0.00016	K	SLNNQFASFIDKVR	F					Ar_BSA
1	1	K2C1_HUMAN	Keratin, type II cytoskeletal 1 OS=Homo sapiens GN=KRT1 PE=1 SV=6	15238	66137	498	498	29	29	Homo sapiens	9606	99232	1	1	1	819.93	1637.85	2	1637.85	-0.0075	1	85.98	8.2e-08	K	SLNNQFASFIDKVR	F					Ar_NoBSA
1	1	K2C1_HUMAN	Keratin, type II cytoskeletal 1 OS=Homo sapiens GN=KRT1 PE=1 SV=6	15238	66137	498	498	29	29	Homo sapiens	9606	99233	1	1	1	819.93	1637.85	2	1637.85	-0.0067	1	69.7	8.8e-07	K	SLNNQFASFIDKVR	F					NoBSA
1	1	K2C1_HUMAN	Keratin, type II cytoskeletal 1 OS=Homo sapiens GN=KRT1 PE=1 SV=6	15238	66137	498	498	29	29	Homo sapiens	9606	99234	1	1	1	819.93	1637.85	2	1637.85	-0.0063	1	56.13	2.1e-05	K	SLNNQFASFIDKVR	F					BSA
1	1	K2C1_HUMAN	Keratin, type II cytoskeletal 1 OS=Homo sapiens GN=KRT1 PE=1 SV=6	15238	66137	498	498	29	29	Homo sapiens	9606	99235	1	1	1	819.932	1637.85	2	1637.85	-0.0037	1	90.69	2.8e-08	K	SLNNQFASFIDKVR	F					Nh3_NoBSA
1	1	K2C1_HUMAN	Keratin, type II cytoskeletal 1 OS=Homo sapiens GN=KRT1 PE=1 SV=6	15238	66137	498	498	29	29	Homo sapiens	9606	99237	1	1	1	819.932	1637.85	2	1637.85	-0.0034	1	56.81	1.9e-05	K	SLNNQFASFIDKVR	F					N2_BSA
1	1	K2C1_HUMAN	Keratin, type II cytoskeletal 1 OS=Homo sapiens GN=KRT1 PE=1 SV=6	15238	66137	498	498	29	29	Homo sapiens	9606	99240	1	1	1	819.933	1637.85	2	1637.85	-0.0018	1	67.93	3.4e-06	K	SLNNQFASFIDKVR	F					Un_NoBSA
1	1	K2C1_HUMAN	Keratin, type II cytoskeletal 1 OS=Homo sapiens GN=KRT1 PE=1 SV=6	15238	66137	498	498	29	29	Homo sapiens	9606	99241	1	1	1	819.933	1637.85	2	1637.85	-0.0007	1	34.12	0.0016	K	SLNNQFASFIDKVR	F					Un_NoBSA
1	1	K2C1_HUMAN	Keratin, type II cytoskeletal 1 OS=Homo sapiens GN=KRT1 PE=1 SV=6	15238	66137	498	498	29	29	Homo sapiens	9606	99242	1	1	1	819.933	1637.85	2	1637.85	-0.0004	1	68.51	2.2e-06	K	SLNNQFASFIDKVR	F					N2_BSA
1	1	K2C1_HUMAN	Keratin, type II cytoskeletal 1 OS=Homo sapiens GN=KRT1 PE=1 SV=6	15238	66137	498	498	29	29	Homo sapiens	9606	99244	1	1	1	819.934	1637.85	2	1637.85	0.0004	1	74.83	8.3e-07	K	SLNNQFASFIDKVR	F					Un_BSA
1	1	K2C1_HUMAN	Keratin, type II cytoskeletal 1 OS=Homo sapiens GN=KRT1 PE=1 SV=6	15238	66137	498	498	29	29	Homo sapiens	9606	99246	1	1	1	819.934	1637.85	2	1637.85	0.0011	1	55.27	3.5e-05	K	SLNNQFASFIDKVR	F					NoBSA
1	1	K2C1_HUMAN	Keratin, type II cytoskeletal 1 OS=Homo sapiens GN=KRT1 PE=1 SV=6	15238	66137	498	498	29	29	Homo sapiens	9606	99248	1	1	1	819.935	1637.86	2	1637.85	0.0028	1	54.8	6.1e-05	K	SLNNQFASFIDKVR	F					Un_NoBSA
1	1	K2C1_HUMAN	Keratin, type II cytoskeletal 1 OS=Homo sapiens GN=KRT1 PE=1 SV=6	15238	66137	498	498	29	29	Homo sapiens	9606	99251	1	1	1	819.938	1637.86	2	1637.85	0.0079	1	65.97	1.3e-06	K	SLNNQFASFIDKVR	F					BSA
1	1	K2C1_HUMAN	Keratin, type II cytoskeletal 1 OS=Homo sapiens GN=KRT1 PE=1 SV=6	15238	66137	498	498	29	29	Homo sapiens	9606	100590	1	1	1	829.393	1656.77	2	1656.79	-0.0152	0	86.55	1.8e-08	R	SGGGFSSGSAGIINYQR	R					NoBSA
1	1	K2C1_HUMAN	Keratin, type II cytoskeletal 1 OS=Homo sapiens GN=KRT1 PE=1 SV=6	15238	66137	498	498	29	29	Homo sapiens	9606	100591	1	1	1	829.393	1656.77	2	1656.79	-0.0151	0	100.4	9.3e-10	R	SGGGFSSGSAGIINYQR	R					Ar_NoBSA
1	1	K2C1_HUMAN	Keratin, type II cytoskeletal 1 OS=Homo sapiens GN=KRT1 PE=1 SV=6	15238	66137	498	498	29	29	Homo sapiens	9606	100592	1	1	1	829.393	1656.77	2	1656.79	-0.014	0	93.96	3.8e-09	R	SGGGFSSGSAGIINYQR	R					Ar_NoBSA
1	1	K2C1_HUMAN	Keratin, type II cytoskeletal 1 OS=Homo sapiens GN=KRT1 PE=1 SV=6	15238	66137	498	498	29	29	Homo sapiens	9606	100593	1	1	1	829.393	1656.77	2	1656.79	-0.0137	0	66.34	1.4e-06	R	SGGGFSSGSAGIINYQR	R					Nh3_NoBSA
1	1	K2C1_HUMAN	Keratin, type II cytoskeletal 1 OS=Homo sapiens GN=KRT1 PE=1 SV=6	15238	66137	498	498	29	29	Homo sapiens	9606	100594	1	1	1	829.394	1656.77	2	1656.79	-0.0131	0	110.56	1.1e-10	R	SGGGFSSGSAGIINYQR	R					Un_BSA
1	1	K2C1_HUMAN	Keratin, type II cytoskeletal 1 OS=Homo sapiens GN=KRT1 PE=1 SV=6	15238	66137	498	498	29	29	Homo sapiens	9606	100595	1	1	1	829.394	1656.77	2	1656.79	-0.0118	0	118.18	2.6e-11	R	SGGGFSSGSAGIINYQR	R					BSA
1	1	K2C1_HUMAN	Keratin, type II cytoskeletal 1 OS=Homo sapiens GN=KRT1 PE=1 SV=6	15238	66137	498	498	29	29	Homo sapiens	9606	100596	1	1	1	829.395	1656.78	2	1656.79	-0.0103	0	90.79	3.7e-09	R	SGGGFSSGSAGIINYQR	R					N2_NoBSA
1	1	K2C1_HUMAN	Keratin, type II cytoskeletal 1 OS=Homo sapiens GN=KRT1 PE=1 SV=6	15238	66137	498	498	29	29	Homo sapiens	9606	100597	1	1	1	829.395	1656.78	2	1656.79	-0.0095	0	88.14	5.4e-09	R	SGGGFSSGSAGIINYQR	R					Ar_BSA
1	1	K2C1_HUMAN	Keratin, type II cytoskeletal 1 OS=Homo sapiens GN=KRT1 PE=1 SV=6	15238	66137	498	498	29	29	Homo sapiens	9606	100598	1	1	1	829.396	1656.78	2	1656.79	-0.0086	0	83.19	2.2e-08	R	SGGGFSSGSAGIINYQR	R					NoBSA
1	1	K2C1_HUMAN	Keratin, type II cytoskeletal 1 OS=Homo sapiens GN=KRT1 PE=1 SV=6	15238	66137	498	498	29	29	Homo sapiens	9606	100599	1	1	1	829.396	1656.78	2	1656.79	-0.0077	0	94.12	3.5e-09	R	SGGGFSSGSAGIINYQR	R					BSA
1	1	K2C1_HUMAN	Keratin, type II cytoskeletal 1 OS=Homo sapiens GN=KRT1 PE=1 SV=6	15238	66137	498	498	29	29	Homo sapiens	9606	100600	1	1	1	829.396	1656.78	2	1656.79	-0.0074	0	107.56	1.2e-10	R	SGGGFSSGSAGIINYQR	R					Nh3_BSA
1	1	K2C1_HUMAN	Keratin, type II cytoskeletal 1 OS=Homo sapiens GN=KRT1 PE=1 SV=6	15238	66137	498	498	29	29	Homo sapiens	9606	100601	1	1	1	829.397	1656.78	2	1656.79	-0.0059	0	105.84	2.7e-10	R	SGGGFSSGSAGIINYQR	R					Un_NoBSA
1	1	K2C1_HUMAN	Keratin, type II cytoskeletal 1 OS=Homo sapiens GN=KRT1 PE=1 SV=6	15238	66137	498	498	29	29	Homo sapiens	9606	100602	1	1	1	829.398	1656.78	2	1656.79	-0.005	0	105.78	2.8e-10	R	SGGGFSSGSAGIINYQR	R					Un_BSA
1	1	K2C1_HUMAN	Keratin, type II cytoskeletal 1 OS=Homo sapiens GN=KRT1 PE=1 SV=6	15238	66137	498	498	29	29	Homo sapiens	9606	100603	1	1	1	829.398	1656.78	2	1656.79	-0.0042	0	122.75	1e-11	R	SGGGFSSGSAGIINYQR	R					Un_NoBSA
1	1	K2C1_HUMAN	Keratin, type II cytoskeletal 1 OS=Homo sapiens GN=KRT1 PE=1 SV=6	15238	66137	498	498	29	29	Homo sapiens	9606	100604	1	1	1	829.398	1656.78	2	1656.79	-0.0037	0	76.99	8.8e-08	R	SGGGFSSGSAGIINYQR	R					Un_BSA
1	1	K2C1_HUMAN	Keratin, type II cytoskeletal 1 OS=Homo sapiens GN=KRT1 PE=1 SV=6	15238	66137	498	498	29	29	Homo sapiens	9606	100605	1	1	1	829.398	1656.78	2	1656.79	-0.0037	0	101.87	9.7e-10	R	SGGGFSSGSAGIINYQR	R					Ar_BSA
1	1	K2C1_HUMAN	Keratin, type II cytoskeletal 1 OS=Homo sapiens GN=KRT1 PE=1 SV=6	15238	66137	498	498	29	29	Homo sapiens	9606	100606	1	1	1	829.399	1656.78	2	1656.79	-0.0029	0	118.32	3.3e-11	R	SGGGFSSGSAGIINYQR	R					BSA
1	1	K2C1_HUMAN	Keratin, type II cytoskeletal 1 OS=Homo sapiens GN=KRT1 PE=1 SV=6	15238	66137	498	498	29	29	Homo sapiens	9606	100607	1	1	1	829.399	1656.78	2	1656.79	-0.0027	0	118.7	1.2e-11	R	SGGGFSSGSAGIINYQR	R					Nh3_BSA
1	1	K2C1_HUMAN	Keratin, type II cytoskeletal 1 OS=Homo sapiens GN=KRT1 PE=1 SV=6	15238	66137	498	498	29	29	Homo sapiens	9606	100608	1	1	1	829.4	1656.79	2	1656.79	-0.0001	0	96.52	8.9e-10	R	SGGGFSSGSAGIINYQR	R					Nh3_NoBSA
1	1	K2C1_HUMAN	Keratin, type II cytoskeletal 1 OS=Homo sapiens GN=KRT1 PE=1 SV=6	15238	66137	498	498	29	29	Homo sapiens	9606	100609	1	1	1	829.4	1656.79	2	1656.79	-0.0001	0	96.65	8.7e-10	R	SGGGFSSGSAGIINYQR	R					BSA
1	1	K2C1_HUMAN	Keratin, type II cytoskeletal 1 OS=Homo sapiens GN=KRT1 PE=1 SV=6	15238	66137	498	498	29	29	Homo sapiens	9606	100610	1	1	1	829.401	1656.79	2	1656.79	0.002	0	96.71	8.6e-10	R	SGGGFSSGSAGIINYQR	R					N2_BSA
1	1	K2C1_HUMAN	Keratin, type II cytoskeletal 1 OS=Homo sapiens GN=KRT1 PE=1 SV=6	15238	66137	498	498	29	29	Homo sapiens	9606	100611	1	1	1	829.402	1656.79	2	1656.79	0.0043	0	92.88	3.9e-09	R	SGGGFSSGSAGIINYQR	R					Nh3_NoBSA
1	1	K2C1_HUMAN	Keratin, type II cytoskeletal 1 OS=Homo sapiens GN=KRT1 PE=1 SV=6	15238	66137	498	498	29	29	Homo sapiens	9606	100612	1	1	1	829.404	1656.79	2	1656.79	0.0076	0	109.73	6.1e-11	R	SGGGFSSGSAGIINYQR	R					Un_NoBSA
1	1	K2C1_HUMAN	Keratin, type II cytoskeletal 1 OS=Homo sapiens GN=KRT1 PE=1 SV=6	15238	66137	498	498	29	29	Homo sapiens	9606	103808	1	1	1	858.922	1715.83	2	1715.84	-0.0143	0	77.43	5.5e-08	K	QISNLQQSISDAEQR	G					Un_NoBSA
1	1	K2C1_HUMAN	Keratin, type II cytoskeletal 1 OS=Homo sapiens GN=KRT1 PE=1 SV=6	15238	66137	498	498	29	29	Homo sapiens	9606	103809	1	1	1	858.923	1715.83	2	1715.84	-0.0123	0	85.3	3.6e-08	K	QISNLQQSISDAEQR	G					Ar_NoBSA
1	1	K2C1_HUMAN	Keratin, type II cytoskeletal 1 OS=Homo sapiens GN=KRT1 PE=1 SV=6	15238	66137	498	498	29	29	Homo sapiens	9606	103810	1	1	1	858.923	1715.83	2	1715.84	-0.0121	0	100.79	9.4e-10	K	QISNLQQSISDAEQR	G					BSA
1	1	K2C1_HUMAN	Keratin, type II cytoskeletal 1 OS=Homo sapiens GN=KRT1 PE=1 SV=6	15238	66137	498	498	29	29	Homo sapiens	9606	103811	1	1	1	858.923	1715.83	2	1715.84	-0.0114	0	71.51	3.4e-07	K	QISNLQQSISDAEQR	G					NoBSA
1	1	K2C1_HUMAN	Keratin, type II cytoskeletal 1 OS=Homo sapiens GN=KRT1 PE=1 SV=6	15238	66137	498	498	29	29	Homo sapiens	9606	103812	1	1	1	858.924	1715.83	2	1715.84	-0.0095	0	96.62	7.4e-09	K	QISNLQQSISDAEQR	G					Un_NoBSA
1	1	K2C1_HUMAN	Keratin, type II cytoskeletal 1 OS=Homo sapiens GN=KRT1 PE=1 SV=6	15238	66137	498	498	29	29	Homo sapiens	9606	103814	1	1	1	858.926	1715.84	2	1715.84	-0.0066	0	72.04	7.9e-07	K	QISNLQQSISDAEQR	G					BSA
1	1	K2C1_HUMAN	Keratin, type II cytoskeletal 1 OS=Homo sapiens GN=KRT1 PE=1 SV=6	15238	66137	498	498	29	29	Homo sapiens	9606	103815	1	1	1	858.926	1715.84	2	1715.84	-0.0063	0	63.8	1.3e-06	K	QISNLQQSISDAEQR	G					N2_BSA
1	1	K2C1_HUMAN	Keratin, type II cytoskeletal 1 OS=Homo sapiens GN=KRT1 PE=1 SV=6	15238	66137	498	498	29	29	Homo sapiens	9606	103816	1	1	1	858.926	1715.84	2	1715.84	-0.0063	0	94.06	7e-09	K	QISNLQQSISDAEQR	G					Ar_BSA
1	1	K2C1_HUMAN	Keratin, type II cytoskeletal 1 OS=Homo sapiens GN=KRT1 PE=1 SV=6	15238	66137	498	498	29	29	Homo sapiens	9606	103817	1	1	1	858.926	1715.84	2	1715.84	-0.0061	0	98.68	3.5e-09	K	QISNLQQSISDAEQR	G					Un_BSA
1	1	K2C1_HUMAN	Keratin, type II cytoskeletal 1 OS=Homo sapiens GN=KRT1 PE=1 SV=6	15238	66137	498	498	29	29	Homo sapiens	9606	103818	1	1	1	858.926	1715.84	2	1715.84	-0.0058	0	66.01	1e-06	K	QISNLQQSISDAEQR	G					Nh3_NoBSA
1	1	K2C1_HUMAN	Keratin, type II cytoskeletal 1 OS=Homo sapiens GN=KRT1 PE=1 SV=6	15238	66137	498	498	29	29	Homo sapiens	9606	103819	1	1	1	858.926	1715.84	2	1715.84	-0.0057	0	87.82	3.6e-08	K	QISNLQQSISDAEQR	G					Nh3_NoBSA
1	1	K2C1_HUMAN	Keratin, type II cytoskeletal 1 OS=Homo sapiens GN=KRT1 PE=1 SV=6	15238	66137	498	498	29	29	Homo sapiens	9606	103820	1	1	1	858.927	1715.84	2	1715.84	-0.0052	0	70.7	5.1e-07	K	QISNLQQSISDAEQR	G					BSA
1	1	K2C1_HUMAN	Keratin, type II cytoskeletal 1 OS=Homo sapiens GN=KRT1 PE=1 SV=6	15238	66137	498	498	29	29	Homo sapiens	9606	103821	1	1	1	858.927	1715.84	2	1715.84	-0.0052	0	94.28	9.5e-09	K	QISNLQQSISDAEQR	G					Ar_BSA
1	1	K2C1_HUMAN	Keratin, type II cytoskeletal 1 OS=Homo sapiens GN=KRT1 PE=1 SV=6	15238	66137	498	498	29	29	Homo sapiens	9606	103822	1	1	1	858.927	1715.84	2	1715.84	-0.0049	0	97.76	1.4e-09	K	QISNLQQSISDAEQR	G					Ar_BSA
1	1	K2C1_HUMAN	Keratin, type II cytoskeletal 1 OS=Homo sapiens GN=KRT1 PE=1 SV=6	15238	66137	498	498	29	29	Homo sapiens	9606	103823	1	1	1	858.927	1715.84	2	1715.84	-0.0037	0	77.26	5.9e-07	K	QISNLQQSISDAEQR	G					N2_NoBSA
1	1	K2C1_HUMAN	Keratin, type II cytoskeletal 1 OS=Homo sapiens GN=KRT1 PE=1 SV=6	15238	66137	498	498	29	29	Homo sapiens	9606	103824	1	1	1	858.928	1715.84	2	1715.84	-0.0033	0	81.22	5.9e-08	K	QISNLQQSISDAEQR	G					NoBSA
1	1	K2C1_HUMAN	Keratin, type II cytoskeletal 1 OS=Homo sapiens GN=KRT1 PE=1 SV=6	15238	66137	498	498	29	29	Homo sapiens	9606	103825	1	1	1	858.928	1715.84	2	1715.84	-0.0031	0	106.94	4.4e-10	K	QISNLQQSISDAEQR	G					Nh3_NoBSA
1	1	K2C1_HUMAN	Keratin, type II cytoskeletal 1 OS=Homo sapiens GN=KRT1 PE=1 SV=6	15238	66137	498	498	29	29	Homo sapiens	9606	103826	1	1	1	858.928	1715.84	2	1715.84	-0.0019	0	75.35	8.6e-08	K	QISNLQQSISDAEQR	G					N2_NoBSA
1	1	K2C1_HUMAN	Keratin, type II cytoskeletal 1 OS=Homo sapiens GN=KRT1 PE=1 SV=6	15238	66137	498	498	29	29	Homo sapiens	9606	103827	1	1	1	858.928	1715.84	2	1715.84	-0.0019	0	104.03	6.1e-10	K	QISNLQQSISDAEQR	G					Un_BSA
1	1	K2C1_HUMAN	Keratin, type II cytoskeletal 1 OS=Homo sapiens GN=KRT1 PE=1 SV=6	15238	66137	498	498	29	29	Homo sapiens	9606	103828	1	1	1	858.928	1715.84	2	1715.84	-0.0016	0	82.23	5.4e-08	K	QISNLQQSISDAEQR	G					Nh3_BSA
1	1	K2C1_HUMAN	Keratin, type II cytoskeletal 1 OS=Homo sapiens GN=KRT1 PE=1 SV=6	15238	66137	498	498	29	29	Homo sapiens	9606	103829	1	1	1	858.929	1715.84	2	1715.84	0.0006	0	67.7	4.5e-07	K	QISNLQQSISDAEQR	G					Ar_NoBSA
1	1	K2C1_HUMAN	Keratin, type II cytoskeletal 1 OS=Homo sapiens GN=KRT1 PE=1 SV=6	15238	66137	498	498	29	29	Homo sapiens	9606	103830	1	1	1	858.929	1715.84	2	1715.84	0.0007	0	93.49	1.7e-09	K	QISNLQQSISDAEQR	G					Un_NoBSA
1	1	K2C1_HUMAN	Keratin, type II cytoskeletal 1 OS=Homo sapiens GN=KRT1 PE=1 SV=6	15238	66137	498	498	29	29	Homo sapiens	9606	103831	1	1	1	858.93	1715.85	2	1715.84	0.0019	0	80.33	2.9e-08	K	QISNLQQSISDAEQR	G					BSA
1	1	K2C1_HUMAN	Keratin, type II cytoskeletal 1 OS=Homo sapiens GN=KRT1 PE=1 SV=6	15238	66137	498	498	29	29	Homo sapiens	9606	103835	1	1	1	858.933	1715.85	2	1715.84	0.0067	0	90.84	3e-09	K	QISNLQQSISDAEQR	G					N2_NoBSA
1	1	K2C1_HUMAN	Keratin, type II cytoskeletal 1 OS=Homo sapiens GN=KRT1 PE=1 SV=6	15238	66137	498	498	29	29	Homo sapiens	9606	103836	1	1	1	858.933	1715.85	2	1715.84	0.0077	0	42.13	0.00017	K	QISNLQQSISDAEQR	G					Nh3_BSA
1	1	K2C1_HUMAN	Keratin, type II cytoskeletal 1 OS=Homo sapiens GN=KRT1 PE=1 SV=6	15238	66137	498	498	29	29	Homo sapiens	9606	103837	1	1	1	858.934	1715.85	2	1715.84	0.0104	0	74.44	1e-07	K	QISNLQQSISDAEQR	G					N2_BSA
1	1	K2C1_HUMAN	Keratin, type II cytoskeletal 1 OS=Homo sapiens GN=KRT1 PE=1 SV=6	15238	66137	498	498	29	29	Homo sapiens	9606	103691	1	1	1	859.427	1716.84	2	1716.83	0.0109	0	46.03	0.00013	K	QISNLQQSISDAEQR	G	Deamidated (NQ)	0.000100000000000.0			N2_BSA
1	1	K2C1_HUMAN	Keratin, type II cytoskeletal 1 OS=Homo sapiens GN=KRT1 PE=1 SV=6	15238	66137	498	498	29	29	Homo sapiens	9606	109745	1	1	1	615.658	1843.95	3	1843.94	0.0135	1	62.57	1.8e-06	K	KQISNLQQSISDAEQR	G					Nh3_NoBSA
1	1	K2C1_HUMAN	Keratin, type II cytoskeletal 1 OS=Homo sapiens GN=KRT1 PE=1 SV=6	15238	66137	498	498	29	29	Homo sapiens	9606	109746	1	1	1	615.66	1843.96	3	1843.94	0.0184	1	77.88	8.4e-08	K	KQISNLQQSISDAEQR	G					N2_NoBSA
1	1	K2C1_HUMAN	Keratin, type II cytoskeletal 1 OS=Homo sapiens GN=KRT1 PE=1 SV=6	15238	66137	498	498	29	29	Homo sapiens	9606	114350	1	1	1	971.489	1940.96	2	1940.98	-0.0176	1	64.26	4.5e-06	K	LNDLEDALQQAKEDLAR	L					Nh3_NoBSA
1	1	K2C1_HUMAN	Keratin, type II cytoskeletal 1 OS=Homo sapiens GN=KRT1 PE=1 SV=6	15238	66137	498	498	29	29	Homo sapiens	9606	114351	1	1	1	971.492	1940.97	2	1940.98	-0.0112	1	55.65	6.1e-06	K	LNDLEDALQQAKEDLAR	L					N2_NoBSA
1	1	K2C1_HUMAN	Keratin, type II cytoskeletal 1 OS=Homo sapiens GN=KRT1 PE=1 SV=6	15238	66137	498	498	29	29	Homo sapiens	9606	114354	1	1	1	648.001	1940.98	3	1940.98	0.0025	1	33.52	0.0032	K	LNDLEDALQQAKEDLAR	L					BSA
1	1	K2C1_HUMAN	Keratin, type II cytoskeletal 1 OS=Homo sapiens GN=KRT1 PE=1 SV=6	15238	66137	498	498	29	29	Homo sapiens	9606	114357	1	1	1	648.003	1940.99	3	1940.98	0.0061	1	49.02	0.00013	K	LNDLEDALQQAKEDLAR	L					Nh3_BSA
1	1	K2C1_HUMAN	Keratin, type II cytoskeletal 1 OS=Homo sapiens GN=KRT1 PE=1 SV=6	15238	66137	498	498	29	29	Homo sapiens	9606	114358	1	1	1	648.004	1940.99	3	1940.98	0.0096	1	66.92	5.9e-07	K	LNDLEDALQQAKEDLAR	L					Un_BSA
1	1	K2C1_HUMAN	Keratin, type II cytoskeletal 1 OS=Homo sapiens GN=KRT1 PE=1 SV=6	15238	66137	498	498	29	29	Homo sapiens	9606	114360	1	1	1	648.006	1941	3	1940.98	0.015	1	48.63	8.4e-05	K	LNDLEDALQQAKEDLAR	L					N2_NoBSA
1	1	K2C1_HUMAN	Keratin, type II cytoskeletal 1 OS=Homo sapiens GN=KRT1 PE=1 SV=6	15238	66137	498	498	29	29	Homo sapiens	9606	114361	1	1	1	648.006	1941	3	1940.98	0.0152	1	32.05	0.00099	K	LNDLEDALQQAKEDLAR	L					N2_NoBSA
1	1	K2C1_HUMAN	Keratin, type II cytoskeletal 1 OS=Homo sapiens GN=KRT1 PE=1 SV=6	15238	66137	498	498	29	29	Homo sapiens	9606	114175	1	1	1	648.006	1941	3	1940.98	0.0157	1	59.74	7.5e-06	K	LNDLEDALQQAKEDLAR	L					Ar_BSA
1	1	K2C1_HUMAN	Keratin, type II cytoskeletal 1 OS=Homo sapiens GN=KRT1 PE=1 SV=6	15238	66137	498	498	29	29	Homo sapiens	9606	114362	1	1	1	648.007	1941	3	1940.98	0.0179	1	74.44	6.5e-07	K	LNDLEDALQQAKEDLAR	L					Nh3_NoBSA
1	1	K2C1_HUMAN	Keratin, type II cytoskeletal 1 OS=Homo sapiens GN=KRT1 PE=1 SV=6	15238	66137	498	498	29	29	Homo sapiens	9606	114363	1	1	1	648.007	1941	3	1940.98	0.0183	1	55.04	2.1e-05	K	LNDLEDALQQAKEDLAR	L					Un_NoBSA
1	1	K2C1_HUMAN	Keratin, type II cytoskeletal 1 OS=Homo sapiens GN=KRT1 PE=1 SV=6	15238	66137	498	498	29	29	Homo sapiens	9606	114364	1	1	1	648.007	1941	3	1940.98	0.0194	1	67.44	6.8e-07	K	LNDLEDALQQAKEDLAR	L					Ar_NoBSA
1	1	K2C1_HUMAN	Keratin, type II cytoskeletal 1 OS=Homo sapiens GN=KRT1 PE=1 SV=6	15238	66137	498	498	29	29	Homo sapiens	9606	114471	1	1	1	648.334	1941.98	3	1941.96	0.0156	1	32.06	0.0044	K	LNDLEDALQQAKEDLAR	L	Deamidated (NQ)	0.00000000010000000.0			Nh3_NoBSA
1	1	K2C1_HUMAN	Keratin, type II cytoskeletal 1 OS=Homo sapiens GN=KRT1 PE=1 SV=6	15238	66137	498	498	29	29	Homo sapiens	9606	116434	1	1	1	997.482	1992.95	2	1992.97	-0.0197	0	41.71	0.00012	R	THNLEPYFESFINNLR	R					Nh3_BSA
1	1	K2C1_HUMAN	Keratin, type II cytoskeletal 1 OS=Homo sapiens GN=KRT1 PE=1 SV=6	15238	66137	498	498	29	29	Homo sapiens	9606	116435	1	1	1	997.482	1992.95	2	1992.97	-0.0191	0	36.14	0.00041	R	THNLEPYFESFINNLR	R					N2_NoBSA
1	1	K2C1_HUMAN	Keratin, type II cytoskeletal 1 OS=Homo sapiens GN=KRT1 PE=1 SV=6	15238	66137	498	498	29	29	Homo sapiens	9606	116436	1	1	1	997.482	1992.95	2	1992.97	-0.0191	0	58.28	3.4e-06	R	THNLEPYFESFINNLR	R					Un_NoBSA
1	1	K2C1_HUMAN	Keratin, type II cytoskeletal 1 OS=Homo sapiens GN=KRT1 PE=1 SV=6	15238	66137	498	498	29	29	Homo sapiens	9606	116437	1	1	1	997.483	1992.95	2	1992.97	-0.0188	0	57.06	4.5e-06	R	THNLEPYFESFINNLR	R					Nh3_NoBSA
1	1	K2C1_HUMAN	Keratin, type II cytoskeletal 1 OS=Homo sapiens GN=KRT1 PE=1 SV=6	15238	66137	498	498	29	29	Homo sapiens	9606	116438	1	1	1	997.483	1992.95	2	1992.97	-0.0185	0	49.74	2.6e-05	R	THNLEPYFESFINNLR	R					Ar_NoBSA
1	1	K2C1_HUMAN	Keratin, type II cytoskeletal 1 OS=Homo sapiens GN=KRT1 PE=1 SV=6	15238	66137	498	498	29	29	Homo sapiens	9606	116439	1	1	1	997.483	1992.95	2	1992.97	-0.0178	0	47.56	4.3e-05	R	THNLEPYFESFINNLR	R					Un_BSA
1	1	K2C1_HUMAN	Keratin, type II cytoskeletal 1 OS=Homo sapiens GN=KRT1 PE=1 SV=6	15238	66137	498	498	29	29	Homo sapiens	9606	116440	1	1	1	997.484	1992.95	2	1992.97	-0.0167	0	43.22	8.9e-05	R	THNLEPYFESFINNLR	R					Ar_BSA
1	1	K2C1_HUMAN	Keratin, type II cytoskeletal 1 OS=Homo sapiens GN=KRT1 PE=1 SV=6	15238	66137	498	498	29	29	Homo sapiens	9606	116441	1	1	1	997.484	1992.95	2	1992.97	-0.0155	0	40.76	0.00015	R	THNLEPYFESFINNLR	R					Un_NoBSA
1	1	K2C1_HUMAN	Keratin, type II cytoskeletal 1 OS=Homo sapiens GN=KRT1 PE=1 SV=6	15238	66137	498	498	29	29	Homo sapiens	9606	116442	1	1	1	997.485	1992.95	2	1992.97	-0.0147	0	43.7	8e-05	R	THNLEPYFESFINNLR	R					Un_NoBSA
1	1	K2C1_HUMAN	Keratin, type II cytoskeletal 1 OS=Homo sapiens GN=KRT1 PE=1 SV=6	15238	66137	498	498	29	29	Homo sapiens	9606	116443	1	1	1	997.485	1992.96	2	1992.97	-0.014	0	54.27	1.2e-05	R	THNLEPYFESFINNLR	R					Nh3_NoBSA
1	1	K2C1_HUMAN	Keratin, type II cytoskeletal 1 OS=Homo sapiens GN=KRT1 PE=1 SV=6	15238	66137	498	498	29	29	Homo sapiens	9606	116444	1	1	1	997.486	1992.96	2	1992.97	-0.0126	0	59.71	3.2e-06	R	THNLEPYFESFINNLR	R					NoBSA
1	1	K2C1_HUMAN	Keratin, type II cytoskeletal 1 OS=Homo sapiens GN=KRT1 PE=1 SV=6	15238	66137	498	498	29	29	Homo sapiens	9606	116445	1	1	1	997.486	1992.96	2	1992.97	-0.0123	0	29.22	0.0018	R	THNLEPYFESFINNLR	R					N2_BSA
1	1	K2C1_HUMAN	Keratin, type II cytoskeletal 1 OS=Homo sapiens GN=KRT1 PE=1 SV=6	15238	66137	498	498	29	29	Homo sapiens	9606	116448	1	1	1	997.487	1992.96	2	1992.97	-0.0107	0	25.67	0.0039	R	THNLEPYFESFINNLR	R					BSA
1	1	K2C1_HUMAN	Keratin, type II cytoskeletal 1 OS=Homo sapiens GN=KRT1 PE=1 SV=6	15238	66137	498	498	29	29	Homo sapiens	9606	116449	1	1	1	665.328	1992.96	3	1992.97	-0.0057	0	63.62	1.1e-06	R	THNLEPYFESFINNLR	R					Un_NoBSA
1	1	K2C1_HUMAN	Keratin, type II cytoskeletal 1 OS=Homo sapiens GN=KRT1 PE=1 SV=6	15238	66137	498	498	29	29	Homo sapiens	9606	116450	1	1	1	665.33	1992.97	3	1992.97	-0.0016	0	35.27	0.00063	R	THNLEPYFESFINNLR	R					Ar_BSA
1	1	K2C1_HUMAN	Keratin, type II cytoskeletal 1 OS=Homo sapiens GN=KRT1 PE=1 SV=6	15238	66137	498	498	29	29	Homo sapiens	9606	116451	1	1	1	665.331	1992.97	3	1992.97	0.0019	0	64.8	9.9e-07	R	THNLEPYFESFINNLR	R					N2_NoBSA
1	1	K2C1_HUMAN	Keratin, type II cytoskeletal 1 OS=Homo sapiens GN=KRT1 PE=1 SV=6	15238	66137	498	498	29	29	Homo sapiens	9606	116456	1	1	1	665.334	1992.98	3	1992.97	0.0106	0	39.79	0.00019	R	THNLEPYFESFINNLR	R					BSA
1	1	K2C1_HUMAN	Keratin, type II cytoskeletal 1 OS=Homo sapiens GN=KRT1 PE=1 SV=6	15238	66137	498	498	29	29	Homo sapiens	9606	116457	1	1	1	665.334	1992.98	3	1992.97	0.0117	0	45.73	5.8e-05	R	THNLEPYFESFINNLR	R					BSA
1	1	K2C1_HUMAN	Keratin, type II cytoskeletal 1 OS=Homo sapiens GN=KRT1 PE=1 SV=6	15238	66137	498	498	29	29	Homo sapiens	9606	116458	1	1	1	665.334	1992.98	3	1992.97	0.0122	0	51.04	1.8e-05	R	THNLEPYFESFINNLR	R					Nh3_NoBSA
1	1	K2C1_HUMAN	Keratin, type II cytoskeletal 1 OS=Homo sapiens GN=KRT1 PE=1 SV=6	15238	66137	498	498	29	29	Homo sapiens	9606	116459	1	1	1	665.335	1992.98	3	1992.97	0.0131	0	52.41	1.2e-05	R	THNLEPYFESFINNLR	R					N2_BSA
1	1	K2C1_HUMAN	Keratin, type II cytoskeletal 1 OS=Homo sapiens GN=KRT1 PE=1 SV=6	15238	66137	498	498	29	29	Homo sapiens	9606	116460	1	1	1	665.335	1992.98	3	1992.97	0.0136	0	54.38	8e-06	R	THNLEPYFESFINNLR	R					Nh3_BSA
1	1	K2C1_HUMAN	Keratin, type II cytoskeletal 1 OS=Homo sapiens GN=KRT1 PE=1 SV=6	15238	66137	498	498	29	29	Homo sapiens	9606	116461	1	1	1	665.335	1992.98	3	1992.97	0.0141	0	48.72	2.7e-05	R	THNLEPYFESFINNLR	R					Ar_BSA
1	1	K2C1_HUMAN	Keratin, type II cytoskeletal 1 OS=Homo sapiens GN=KRT1 PE=1 SV=6	15238	66137	498	498	29	29	Homo sapiens	9606	116463	1	1	1	665.336	1992.99	3	1992.97	0.0162	0	58.51	3.3e-06	R	THNLEPYFESFINNLR	R					Nh3_BSA
1	1	K2C1_HUMAN	Keratin, type II cytoskeletal 1 OS=Homo sapiens GN=KRT1 PE=1 SV=6	15238	66137	498	498	29	29	Homo sapiens	9606	116464	1	1	1	665.336	1992.99	3	1992.97	0.0167	0	67.75	6.4e-07	R	THNLEPYFESFINNLR	R					Ar_NoBSA
1	1	K2C1_HUMAN	Keratin, type II cytoskeletal 1 OS=Homo sapiens GN=KRT1 PE=1 SV=6	15238	66137	498	498	29	29	Homo sapiens	9606	116465	1	1	1	665.336	1992.99	3	1992.97	0.0169	0	50.12	2e-05	R	THNLEPYFESFINNLR	R					Un_BSA
1	1	K2C1_HUMAN	Keratin, type II cytoskeletal 1 OS=Homo sapiens GN=KRT1 PE=1 SV=6	15238	66137	498	498	29	29	Homo sapiens	9606	116466	1	1	1	665.337	1992.99	3	1992.97	0.019	0	65.59	8e-07	R	THNLEPYFESFINNLR	R					N2_NoBSA
1	1	K2C1_HUMAN	Keratin, type II cytoskeletal 1 OS=Homo sapiens GN=KRT1 PE=1 SV=6	15238	66137	498	498	29	29	Homo sapiens	9606	116467	1	1	1	665.337	1992.99	3	1992.97	0.019	0	65.46	7.3e-07	R	THNLEPYFESFINNLR	R					Un_BSA
1	1	K2C1_HUMAN	Keratin, type II cytoskeletal 1 OS=Homo sapiens GN=KRT1 PE=1 SV=6	15238	66137	498	498	29	29	Homo sapiens	9606	116469	1	1	1	665.337	1992.99	3	1992.97	0.0195	0	80.23	4.3e-08	R	THNLEPYFESFINNLR	R					BSA
1	1	K2C1_HUMAN	Keratin, type II cytoskeletal 1 OS=Homo sapiens GN=KRT1 PE=1 SV=6	15238	66137	498	498	29	29	Homo sapiens	9606	116383	1	1	1	665.657	1993.95	3	1993.95	-0.0034	0	42.97	0.00017	R	THNLEPYFESFINNLR	R	Deamidated (NQ)	0.0000000000000100.0			Un_BSA
1	1	K2C1_HUMAN	Keratin, type II cytoskeletal 1 OS=Homo sapiens GN=KRT1 PE=1 SV=6	15238	66137	498	498	29	29	Homo sapiens	9606	116497	1	1	1	665.664	1993.97	3	1993.95	0.0161	0	47.26	3.7e-05	R	THNLEPYFESFINNLR	R	Deamidated (NQ)	0.0000000000001000.0			Nh3_NoBSA
1	1	K2C1_HUMAN	Keratin, type II cytoskeletal 1 OS=Homo sapiens GN=KRT1 PE=1 SV=6	15238	66137	498	498	29	29	Homo sapiens	9606	116498	1	1	1	665.664	1993.97	3	1993.95	0.0178	0	44.75	6.4e-05	R	THNLEPYFESFINNLR	R	Deamidated (NQ)	0.0000000000001000.0			Ar_NoBSA
1	1	K2C1_HUMAN	Keratin, type II cytoskeletal 1 OS=Homo sapiens GN=KRT1 PE=1 SV=6	15238	66137	498	498	29	29	Homo sapiens	9606	117197	1	1	1	673.301	2016.88	3	2016.88	0.0034	1	41.37	0.00057	R	LDSELKNMQDMVEDYR	N	2 Oxidation (M)	0.0000000200200000.0			N2_BSA
1	1	K2C1_HUMAN	Keratin, type II cytoskeletal 1 OS=Homo sapiens GN=KRT1 PE=1 SV=6	15238	66137	498	498	29	29	Homo sapiens	9606	117199	1	1	1	673.304	2016.89	3	2016.88	0.013	1	33.5	0.0033	R	LDSELKNMQDMVEDYR	N	2 Oxidation (M)	0.0000000200200000.0			N2_BSA
1	1	K2C1_HUMAN	Keratin, type II cytoskeletal 1 OS=Homo sapiens GN=KRT1 PE=1 SV=6	15238	66137	498	498	29	29	Homo sapiens	9606	117200	1	1	1	673.304	2016.89	3	2016.88	0.0137	1	28.08	0.0037	R	LDSELKNMQDMVEDYR	N	2 Oxidation (M)	0.0000000200200000.0			BSA
1	1	K2C1_HUMAN	Keratin, type II cytoskeletal 1 OS=Homo sapiens GN=KRT1 PE=1 SV=6	15238	66137	498	498	29	29	Homo sapiens	9606	117201	1	1	1	673.304	2016.89	3	2016.88	0.0144	1	36.25	0.00052	R	LDSELKNMQDMVEDYR	N	2 Oxidation (M)	0.0000000200200000.0			NoBSA
1	1	K2C1_HUMAN	Keratin, type II cytoskeletal 1 OS=Homo sapiens GN=KRT1 PE=1 SV=6	15238	66137	498	498	29	29	Homo sapiens	9606	117205	1	1	1	673.306	2016.9	3	2016.88	0.0186	1	41.17	0.0006	R	LDSELKNMQDMVEDYR	N	2 Oxidation (M)	0.0000000200200000.0			Ar_BSA
1	1	K2C1_HUMAN	Keratin, type II cytoskeletal 1 OS=Homo sapiens GN=KRT1 PE=1 SV=6	15238	66137	498	498	29	29	Homo sapiens	9606	117206	1	1	1	673.306	2016.9	3	2016.88	0.0194	1	32.76	0.0015	R	LDSELKNMQDMVEDYR	N	2 Oxidation (M)	0.0000000200200000.0			BSA
1	1	K2C1_HUMAN	Keratin, type II cytoskeletal 1 OS=Homo sapiens GN=KRT1 PE=1 SV=6	15238	66137	498	498	29	29	Homo sapiens	9606	117207	1	1	1	673.306	2016.9	3	2016.88	0.0196	1	30.69	0.0017	R	LDSELKNMQDMVEDYR	N	2 Oxidation (M)	0.0000000200200000.0			Ar_NoBSA
1	1	K2C1_HUMAN	Keratin, type II cytoskeletal 1 OS=Homo sapiens GN=KRT1 PE=1 SV=6	15238	66137	498	498	29	29	Homo sapiens	9606	117208	1	1	1	673.306	2016.9	3	2016.88	0.02	1	33.65	0.0034	R	LDSELKNMQDMVEDYR	N	2 Oxidation (M)	0.0000000200200000.0			BSA
1	1	K2C1_HUMAN	Keratin, type II cytoskeletal 1 OS=Homo sapiens GN=KRT1 PE=1 SV=6	15238	66137	498	498	29	29	Homo sapiens	9606	121469	1	1	1	717.363	2149.07	3	2149.07	-0.0031	1	21.58	0.0095	R	THNLEPYFESFINNLRR	R					Un_BSA
1	1	K2C1_HUMAN	Keratin, type II cytoskeletal 1 OS=Homo sapiens GN=KRT1 PE=1 SV=6	15238	66137	498	498	29	29	Homo sapiens	9606	121470	1	1	1	717.364	2149.07	3	2149.07	-0.0011	1	22.07	0.0085	R	THNLEPYFESFINNLRR	R					Ar_NoBSA
1	1	K2C1_HUMAN	Keratin, type II cytoskeletal 1 OS=Homo sapiens GN=KRT1 PE=1 SV=6	15238	66137	498	498	29	29	Homo sapiens	9606	121474	1	1	1	717.365	2149.07	3	2149.07	0.0012	1	31.12	0.0012	R	THNLEPYFESFINNLRR	R					Ar_NoBSA
1	1	K2C1_HUMAN	Keratin, type II cytoskeletal 1 OS=Homo sapiens GN=KRT1 PE=1 SV=6	15238	66137	498	498	29	29	Homo sapiens	9606	121475	1	1	1	717.365	2149.07	3	2149.07	0.0015	1	47.9	3.2e-05	R	THNLEPYFESFINNLRR	R					Ar_BSA
1	1	K2C1_HUMAN	Keratin, type II cytoskeletal 1 OS=Homo sapiens GN=KRT1 PE=1 SV=6	15238	66137	498	498	29	29	Homo sapiens	9606	121476	1	1	1	717.365	2149.07	3	2149.07	0.0017	1	31.27	0.0012	R	THNLEPYFESFINNLRR	R					BSA
1	1	K2C1_HUMAN	Keratin, type II cytoskeletal 1 OS=Homo sapiens GN=KRT1 PE=1 SV=6	15238	66137	498	498	29	29	Homo sapiens	9606	121477	1	1	1	717.365	2149.07	3	2149.07	0.0023	1	24.13	0.0055	R	THNLEPYFESFINNLRR	R					Un_BSA
1	1	K2C1_HUMAN	Keratin, type II cytoskeletal 1 OS=Homo sapiens GN=KRT1 PE=1 SV=6	15238	66137	498	498	29	29	Homo sapiens	9606	121478	1	1	1	717.365	2149.07	3	2149.07	0.0034	1	33.47	0.00073	R	THNLEPYFESFINNLRR	R					Ar_BSA
1	1	K2C1_HUMAN	Keratin, type II cytoskeletal 1 OS=Homo sapiens GN=KRT1 PE=1 SV=6	15238	66137	498	498	29	29	Homo sapiens	9606	121480	1	1	1	717.366	2149.08	3	2149.07	0.0051	1	43.47	8.4e-05	R	THNLEPYFESFINNLRR	R					Ar_BSA
1	1	K2C1_HUMAN	Keratin, type II cytoskeletal 1 OS=Homo sapiens GN=KRT1 PE=1 SV=6	15238	66137	498	498	29	29	Homo sapiens	9606	121481	1	1	1	717.366	2149.08	3	2149.07	0.0052	1	21.85	0.0089	R	THNLEPYFESFINNLRR	R					Nh3_NoBSA
1	1	K2C1_HUMAN	Keratin, type II cytoskeletal 1 OS=Homo sapiens GN=KRT1 PE=1 SV=6	15238	66137	498	498	29	29	Homo sapiens	9606	121482	1	1	1	717.366	2149.08	3	2149.07	0.0066	1	46.68	4.2e-05	R	THNLEPYFESFINNLRR	R					BSA
1	1	K2C1_HUMAN	Keratin, type II cytoskeletal 1 OS=Homo sapiens GN=KRT1 PE=1 SV=6	15238	66137	498	498	29	29	Homo sapiens	9606	121483	1	1	1	717.366	2149.08	3	2149.07	0.0068	1	27.75	0.0025	R	THNLEPYFESFINNLRR	R					N2_BSA
1	1	K2C1_HUMAN	Keratin, type II cytoskeletal 1 OS=Homo sapiens GN=KRT1 PE=1 SV=6	15238	66137	498	498	29	29	Homo sapiens	9606	121485	1	1	1	717.366	2149.08	3	2149.07	0.0073	1	25.58	0.006	R	THNLEPYFESFINNLRR	R					N2_BSA
1	1	K2C1_HUMAN	Keratin, type II cytoskeletal 1 OS=Homo sapiens GN=KRT1 PE=1 SV=6	15238	66137	498	498	29	29	Homo sapiens	9606	121486	1	1	1	717.367	2149.08	3	2149.07	0.0083	1	29	0.0019	R	THNLEPYFESFINNLRR	R					Nh3_BSA
1	1	K2C1_HUMAN	Keratin, type II cytoskeletal 1 OS=Homo sapiens GN=KRT1 PE=1 SV=6	15238	66137	498	498	29	29	Homo sapiens	9606	121487	1	1	1	717.367	2149.08	3	2149.07	0.0083	1	37.06	0.00033	R	THNLEPYFESFINNLRR	R					Nh3_BSA
1	1	K2C1_HUMAN	Keratin, type II cytoskeletal 1 OS=Homo sapiens GN=KRT1 PE=1 SV=6	15238	66137	498	498	29	29	Homo sapiens	9606	121488	1	1	1	717.367	2149.08	3	2149.07	0.0095	1	33.98	0.00071	R	THNLEPYFESFINNLRR	R					Ar_NoBSA
1	1	K2C1_HUMAN	Keratin, type II cytoskeletal 1 OS=Homo sapiens GN=KRT1 PE=1 SV=6	15238	66137	498	498	29	29	Homo sapiens	9606	121493	1	1	1	717.368	2149.08	3	2149.07	0.0118	1	32.21	0.00095	R	THNLEPYFESFINNLRR	R					NoBSA
1	1	K2C1_HUMAN	Keratin, type II cytoskeletal 1 OS=Homo sapiens GN=KRT1 PE=1 SV=6	15238	66137	498	498	29	29	Homo sapiens	9606	121495	1	1	1	717.368	2149.08	3	2149.07	0.0129	1	35.35	0.00048	R	THNLEPYFESFINNLRR	R					Nh3_NoBSA
1	1	K2C1_HUMAN	Keratin, type II cytoskeletal 1 OS=Homo sapiens GN=KRT1 PE=1 SV=6	15238	66137	498	498	29	29	Homo sapiens	9606	121498	1	1	1	717.369	2149.09	3	2149.07	0.0154	1	29.98	0.0015	R	THNLEPYFESFINNLRR	R					NoBSA
1	1	K2C1_HUMAN	Keratin, type II cytoskeletal 1 OS=Homo sapiens GN=KRT1 PE=1 SV=6	15238	66137	498	498	29	29	Homo sapiens	9606	121499	1	1	1	717.369	2149.09	3	2149.07	0.0155	1	39.71	0.00026	R	THNLEPYFESFINNLRR	R					Un_NoBSA
1	1	K2C1_HUMAN	Keratin, type II cytoskeletal 1 OS=Homo sapiens GN=KRT1 PE=1 SV=6	15238	66137	498	498	29	29	Homo sapiens	9606	121501	1	1	1	717.37	2149.09	3	2149.07	0.0162	1	36.7	0.00036	R	THNLEPYFESFINNLRR	R					Nh3_NoBSA
1	1	K2C1_HUMAN	Keratin, type II cytoskeletal 1 OS=Homo sapiens GN=KRT1 PE=1 SV=6	15238	66137	498	498	29	29	Homo sapiens	9606	121502	1	1	1	717.371	2149.09	3	2149.07	0.0196	1	26.67	0.0032	R	THNLEPYFESFINNLRR	R					N2_BSA
1	1	K2C1_HUMAN	Keratin, type II cytoskeletal 1 OS=Homo sapiens GN=KRT1 PE=1 SV=6	15238	66137	498	498	29	29	Homo sapiens	9606	121548	1	1	1	717.69	2150.05	3	2150.05	-0.0054	1	22.33	0.008	R	THNLEPYFESFINNLRR	R	Deamidated (NQ)	0.00000000000010000.0			Nh3_BSA
1	1	K2C1_HUMAN	Keratin, type II cytoskeletal 1 OS=Homo sapiens GN=KRT1 PE=1 SV=6	15238	66137	498	498	29	29	Homo sapiens	9606	121551	1	1	1	717.691	2150.05	3	2150.05	-0.0032	1	24.25	0.0053	R	THNLEPYFESFINNLRR	R	Deamidated (NQ)	0.00000000000010000.0			N2_NoBSA
1	1	K2C1_HUMAN	Keratin, type II cytoskeletal 1 OS=Homo sapiens GN=KRT1 PE=1 SV=6	15238	66137	498	498	29	29	Homo sapiens	9606	121555	1	1	1	717.692	2150.05	3	2150.05	-0.0019	1	22.61	0.0096	R	THNLEPYFESFINNLRR	R	Deamidated (NQ)	0.00000000000010000.0			BSA
1	1	K2C1_HUMAN	Keratin, type II cytoskeletal 1 OS=Homo sapiens GN=KRT1 PE=1 SV=6	15238	66137	498	498	29	29	Homo sapiens	9606	121557	1	1	1	717.692	2150.05	3	2150.05	-0.0004	1	23.78	0.0059	R	THNLEPYFESFINNLRR	R	Deamidated (NQ)	0.00000000000010000.0			N2_BSA
1	1	K2C1_HUMAN	Keratin, type II cytoskeletal 1 OS=Homo sapiens GN=KRT1 PE=1 SV=6	15238	66137	498	498	29	29	Homo sapiens	9606	121567	1	1	1	717.694	2150.06	3	2150.05	0.0058	1	25.57	0.0047	R	THNLEPYFESFINNLRR	R	Deamidated (NQ)	0.00000000000010000.0			Ar_BSA
1	1	K2C1_HUMAN	Keratin, type II cytoskeletal 1 OS=Homo sapiens GN=KRT1 PE=1 SV=6	15238	66137	498	498	29	29	Homo sapiens	9606	121568	1	1	1	717.694	2150.06	3	2150.05	0.0066	1	25.94	0.0037	R	THNLEPYFESFINNLRR	R	Deamidated (NQ)	0.00000000000010000.0			Ar_BSA
1	1	K2C1_HUMAN	Keratin, type II cytoskeletal 1 OS=Homo sapiens GN=KRT1 PE=1 SV=6	15238	66137	498	498	29	29	Homo sapiens	9606	121574	1	1	1	717.695	2150.06	3	2150.05	0.0087	1	32.57	0.00088	R	THNLEPYFESFINNLRR	R	Deamidated (NQ)	0.00000000000010000.0			Ar_BSA
1	1	K2C1_HUMAN	Keratin, type II cytoskeletal 1 OS=Homo sapiens GN=KRT1 PE=1 SV=6	15238	66137	498	498	29	29	Homo sapiens	9606	121578	1	1	1	717.697	2150.07	3	2150.05	0.0135	1	26.75	0.0031	R	THNLEPYFESFINNLRR	R	Deamidated (NQ)	0.00000000000010000.0			Un_NoBSA
1	1	K2C1_HUMAN	Keratin, type II cytoskeletal 1 OS=Homo sapiens GN=KRT1 PE=1 SV=6	15238	66137	498	498	29	29	Homo sapiens	9606	121582	1	1	1	717.698	2150.07	3	2150.05	0.0174	1	36.58	0.00037	R	THNLEPYFESFINNLRR	R	Deamidated (NQ)	0.00000000000001000.0			N2_NoBSA
1	1	K2C1_HUMAN	Keratin, type II cytoskeletal 1 OS=Homo sapiens GN=KRT1 PE=1 SV=6	15238	66137	498	498	29	29	Homo sapiens	9606	125769	1	1	1	762.71	2285.11	3	2285.12	-0.0095	1	40.03	0.00025	K	AEAESLYQSKYEELQITAGR	H					Nh3_NoBSA
1	1	K2C1_HUMAN	Keratin, type II cytoskeletal 1 OS=Homo sapiens GN=KRT1 PE=1 SV=6	15238	66137	498	498	29	29	Homo sapiens	9606	125770	1	1	1	762.711	2285.11	3	2285.12	-0.0051	1	43.14	9e-05	K	AEAESLYQSKYEELQITAGR	H					Nh3_NoBSA
1	1	K2C1_HUMAN	Keratin, type II cytoskeletal 1 OS=Homo sapiens GN=KRT1 PE=1 SV=6	15238	66137	498	498	29	29	Homo sapiens	9606	125771	1	1	1	762.712	2285.11	3	2285.12	-0.0048	1	54.2	8.3e-06	K	AEAESLYQSKYEELQITAGR	H					BSA
1	1	K2C1_HUMAN	Keratin, type II cytoskeletal 1 OS=Homo sapiens GN=KRT1 PE=1 SV=6	15238	66137	498	498	29	29	Homo sapiens	9606	125772	1	1	1	762.713	2285.12	3	2285.12	-0.0016	1	42.67	0.0001	K	AEAESLYQSKYEELQITAGR	H					N2_BSA
1	1	K2C1_HUMAN	Keratin, type II cytoskeletal 1 OS=Homo sapiens GN=KRT1 PE=1 SV=6	15238	66137	498	498	29	29	Homo sapiens	9606	125773	1	1	1	762.713	2285.12	3	2285.12	-0.0009	1	44.81	6.3e-05	K	AEAESLYQSKYEELQITAGR	H					Un_NoBSA
1	1	K2C1_HUMAN	Keratin, type II cytoskeletal 1 OS=Homo sapiens GN=KRT1 PE=1 SV=6	15238	66137	498	498	29	29	Homo sapiens	9606	125774	1	1	1	762.713	2285.12	3	2285.12	0.001	1	50.74	2.4e-05	K	AEAESLYQSKYEELQITAGR	H					N2_NoBSA
1	1	K2C1_HUMAN	Keratin, type II cytoskeletal 1 OS=Homo sapiens GN=KRT1 PE=1 SV=6	15238	66137	498	498	29	29	Homo sapiens	9606	125775	1	1	1	762.713	2285.12	3	2285.12	0.0012	1	38.4	0.00025	K	AEAESLYQSKYEELQITAGR	H					Un_BSA
1	1	K2C1_HUMAN	Keratin, type II cytoskeletal 1 OS=Homo sapiens GN=KRT1 PE=1 SV=6	15238	66137	498	498	29	29	Homo sapiens	9606	125776	1	1	1	762.714	2285.12	3	2285.12	0.0024	1	28.45	0.0027	K	AEAESLYQSKYEELQITAGR	H					N2_NoBSA
1	1	K2C1_HUMAN	Keratin, type II cytoskeletal 1 OS=Homo sapiens GN=KRT1 PE=1 SV=6	15238	66137	498	498	29	29	Homo sapiens	9606	125777	1	1	1	762.714	2285.12	3	2285.12	0.0029	1	54.42	8.7e-06	K	AEAESLYQSKYEELQITAGR	H					BSA
1	1	K2C1_HUMAN	Keratin, type II cytoskeletal 1 OS=Homo sapiens GN=KRT1 PE=1 SV=6	15238	66137	498	498	29	29	Homo sapiens	9606	125778	1	1	1	762.714	2285.12	3	2285.12	0.003	1	55.64	6.1e-06	K	AEAESLYQSKYEELQITAGR	H					BSA
1	1	K2C1_HUMAN	Keratin, type II cytoskeletal 1 OS=Homo sapiens GN=KRT1 PE=1 SV=6	15238	66137	498	498	29	29	Homo sapiens	9606	125779	1	1	1	762.715	2285.12	3	2285.12	0.0045	1	52.03	2.1e-05	K	AEAESLYQSKYEELQITAGR	H					N2_NoBSA
1	1	K2C1_HUMAN	Keratin, type II cytoskeletal 1 OS=Homo sapiens GN=KRT1 PE=1 SV=6	15238	66137	498	498	29	29	Homo sapiens	9606	125780	1	1	1	762.715	2285.12	3	2285.12	0.0051	1	51.25	1.9e-05	K	AEAESLYQSKYEELQITAGR	H					Ar_NoBSA
1	1	K2C1_HUMAN	Keratin, type II cytoskeletal 1 OS=Homo sapiens GN=KRT1 PE=1 SV=6	15238	66137	498	498	29	29	Homo sapiens	9606	125781	1	1	1	762.715	2285.12	3	2285.12	0.0069	1	67.4	8.1e-07	K	AEAESLYQSKYEELQITAGR	H					Ar_BSA
1	1	K2C1_HUMAN	Keratin, type II cytoskeletal 1 OS=Homo sapiens GN=KRT1 PE=1 SV=6	15238	66137	498	498	29	29	Homo sapiens	9606	125782	1	1	1	762.716	2285.13	3	2285.12	0.01	1	50.22	3.8e-05	K	AEAESLYQSKYEELQITAGR	H					Nh3_BSA
1	1	K2C1_HUMAN	Keratin, type II cytoskeletal 1 OS=Homo sapiens GN=KRT1 PE=1 SV=6	15238	66137	498	498	29	29	Homo sapiens	9606	125783	1	1	1	762.717	2285.13	3	2285.12	0.0108	1	60.15	3.5e-06	K	AEAESLYQSKYEELQITAGR	H					Un_NoBSA
1	1	K2C1_HUMAN	Keratin, type II cytoskeletal 1 OS=Homo sapiens GN=KRT1 PE=1 SV=6	15238	66137	498	498	29	29	Homo sapiens	9606	125784	1	1	1	762.717	2285.13	3	2285.12	0.0119	1	62.25	1.5e-06	K	AEAESLYQSKYEELQITAGR	H					Nh3_BSA
1	1	K2C1_HUMAN	Keratin, type II cytoskeletal 1 OS=Homo sapiens GN=KRT1 PE=1 SV=6	15238	66137	498	498	29	29	Homo sapiens	9606	125785	1	1	1	762.717	2285.13	3	2285.12	0.0129	1	48.82	2.6e-05	K	AEAESLYQSKYEELQITAGR	H					Un_NoBSA
1	1	K2C1_HUMAN	Keratin, type II cytoskeletal 1 OS=Homo sapiens GN=KRT1 PE=1 SV=6	15238	66137	498	498	29	29	Homo sapiens	9606	125786	1	1	1	762.718	2285.13	3	2285.12	0.0152	1	84.69	2e-08	K	AEAESLYQSKYEELQITAGR	H					Ar_BSA
1	1	K2C1_HUMAN	Keratin, type II cytoskeletal 1 OS=Homo sapiens GN=KRT1 PE=1 SV=6	15238	66137	498	498	29	29	Homo sapiens	9606	125787	1	1	1	762.718	2285.13	3	2285.12	0.0158	1	43.26	8.8e-05	K	AEAESLYQSKYEELQITAGR	H					Ar_BSA
1	1	K2C1_HUMAN	Keratin, type II cytoskeletal 1 OS=Homo sapiens GN=KRT1 PE=1 SV=6	15238	66137	498	498	29	29	Homo sapiens	9606	125794	1	1	1	763.044	2286.11	3	2286.1	0.0085	1	46.99	4.5e-05	K	AEAESLYQSKYEELQITAGR	H	Deamidated (NQ)	0.00000001000000000000.0			NoBSA
1	1	K2C1_HUMAN	Keratin, type II cytoskeletal 1 OS=Homo sapiens GN=KRT1 PE=1 SV=6	15238	66137	498	498	29	29	Homo sapiens	9606	125752	1	1	1	763.046	2286.12	3	2286.1	0.0155	1	38.48	0.00026	K	AEAESLYQSKYEELQITAGR	H	Deamidated (NQ)	0.00000001000000000000.0			Ar_NoBSA
1	1	K2C1_HUMAN	Keratin, type II cytoskeletal 1 OS=Homo sapiens GN=KRT1 PE=1 SV=6	15238	66137	498	498	29	29	Homo sapiens	9606	125755	1	1	1	763.048	2286.12	3	2286.1	0.0204	1	45.46	8.7e-05	K	AEAESLYQSKYEELQITAGR	H	Deamidated (NQ)	0.00000001000000000000.0			NoBSA
1	1	K2C1_HUMAN	Keratin, type II cytoskeletal 1 OS=Homo sapiens GN=KRT1 PE=1 SV=6	15238	66137	498	498	29	29	Homo sapiens	9606	127328	1	1	1	777.064	2328.17	3	2328.17	0.0025	1	23.79	0.0059	K	QISNLQQSISDAEQRGENALK	D					N2_BSA
1	1	K2C1_HUMAN	Keratin, type II cytoskeletal 1 OS=Homo sapiens GN=KRT1 PE=1 SV=6	15238	66137	498	498	29	29	Homo sapiens	9606	127719	1	1	1	783.737	2348.19	3	2348.21	-0.0227	1	51.14	2.6e-05	R	SLDLDSIIAEVKAQYEDIAQK	S					Nh3_BSA
1	1	K2C1_HUMAN	Keratin, type II cytoskeletal 1 OS=Homo sapiens GN=KRT1 PE=1 SV=6	15238	66137	498	498	29	29	Homo sapiens	9606	127720	1	1	1	783.74	2348.2	3	2348.21	-0.0116	1	47.64	3.4e-05	R	SLDLDSIIAEVKAQYEDIAQK	S					Un_BSA
1	1	K2C1_HUMAN	Keratin, type II cytoskeletal 1 OS=Homo sapiens GN=KRT1 PE=1 SV=6	15238	66137	498	498	29	29	Homo sapiens	9606	127721	1	1	1	783.741	2348.2	3	2348.21	-0.0105	1	42.56	0.00019	R	SLDLDSIIAEVKAQYEDIAQK	S					Ar_BSA
1	1	K2C1_HUMAN	Keratin, type II cytoskeletal 1 OS=Homo sapiens GN=KRT1 PE=1 SV=6	15238	66137	498	498	29	29	Homo sapiens	9606	127722	1	1	1	783.741	2348.2	3	2348.21	-0.0087	1	39.04	0.00022	R	SLDLDSIIAEVKAQYEDIAQK	S					Ar_BSA
1	1	K2C1_HUMAN	Keratin, type II cytoskeletal 1 OS=Homo sapiens GN=KRT1 PE=1 SV=6	15238	66137	498	498	29	29	Homo sapiens	9606	127724	1	1	1	783.743	2348.21	3	2348.21	-0.0048	1	49.49	2.3e-05	R	SLDLDSIIAEVKAQYEDIAQK	S					N2_BSA
1	1	K2C1_HUMAN	Keratin, type II cytoskeletal 1 OS=Homo sapiens GN=KRT1 PE=1 SV=6	15238	66137	498	498	29	29	Homo sapiens	9606	127725	1	1	1	783.743	2348.21	3	2348.21	-0.003	1	44.6	7.2e-05	R	SLDLDSIIAEVKAQYEDIAQK	S					N2_NoBSA
1	1	K2C1_HUMAN	Keratin, type II cytoskeletal 1 OS=Homo sapiens GN=KRT1 PE=1 SV=6	15238	66137	498	498	29	29	Homo sapiens	9606	127726	1	1	1	783.743	2348.21	3	2348.21	-0.003	1	50.03	2e-05	R	SLDLDSIIAEVKAQYEDIAQK	S					Nh3_BSA
1	1	K2C1_HUMAN	Keratin, type II cytoskeletal 1 OS=Homo sapiens GN=KRT1 PE=1 SV=6	15238	66137	498	498	29	29	Homo sapiens	9606	127727	1	1	1	783.744	2348.21	3	2348.21	-0.0009	1	41.04	0.00014	R	SLDLDSIIAEVKAQYEDIAQK	S					BSA
1	1	K2C1_HUMAN	Keratin, type II cytoskeletal 1 OS=Homo sapiens GN=KRT1 PE=1 SV=6	15238	66137	498	498	29	29	Homo sapiens	9606	127728	1	1	1	783.744	2348.21	3	2348.21	0.0002	1	49.07	2.5e-05	R	SLDLDSIIAEVKAQYEDIAQK	S					Ar_NoBSA
1	1	K2C1_HUMAN	Keratin, type II cytoskeletal 1 OS=Homo sapiens GN=KRT1 PE=1 SV=6	15238	66137	498	498	29	29	Homo sapiens	9606	127729	1	1	1	783.745	2348.21	3	2348.21	0.0017	1	30.17	0.0028	R	SLDLDSIIAEVKAQYEDIAQK	S					Un_BSA
1	1	K2C1_HUMAN	Keratin, type II cytoskeletal 1 OS=Homo sapiens GN=KRT1 PE=1 SV=6	15238	66137	498	498	29	29	Homo sapiens	9606	127730	1	1	1	783.746	2348.22	3	2348.21	0.0043	1	72.87	1.5e-07	R	SLDLDSIIAEVKAQYEDIAQK	S					Un_NoBSA
1	1	K2C1_HUMAN	Keratin, type II cytoskeletal 1 OS=Homo sapiens GN=KRT1 PE=1 SV=6	15238	66137	498	498	29	29	Homo sapiens	9606	127731	1	1	1	783.746	2348.22	3	2348.21	0.006	1	58.23	5.8e-06	R	SLDLDSIIAEVKAQYEDIAQK	S					Nh3_NoBSA
1	1	K2C1_HUMAN	Keratin, type II cytoskeletal 1 OS=Homo sapiens GN=KRT1 PE=1 SV=6	15238	66137	498	498	29	29	Homo sapiens	9606	127734	1	1	1	783.75	2348.23	3	2348.21	0.016	1	39.53	0.0002	R	SLDLDSIIAEVKAQYEDIAQK	S					Un_NoBSA
1	1	K2C1_HUMAN	Keratin, type II cytoskeletal 1 OS=Homo sapiens GN=KRT1 PE=1 SV=6	15238	66137	498	498	29	29	Homo sapiens	9606	127735	1	1	1	783.75	2348.23	3	2348.21	0.0169	1	64.07	1.1e-06	R	SLDLDSIIAEVKAQYEDIAQK	S					Nh3_NoBSA
1	1	K2C1_HUMAN	Keratin, type II cytoskeletal 1 OS=Homo sapiens GN=KRT1 PE=1 SV=6	15238	66137	498	498	29	29	Homo sapiens	9606	127802	1	1	1	784.074	2349.2	3	2349.2	0.0043	1	24.71	0.0048	R	SLDLDSIIAEVKAQYEDIAQK	S	Deamidated (NQ)	0.000000000000010000000.0			N2_BSA
1	1	K2C1_HUMAN	Keratin, type II cytoskeletal 1 OS=Homo sapiens GN=KRT1 PE=1 SV=6	15238	66137	498	498	29	29	Homo sapiens	9606	127695	1	1	1	784.076	2349.21	3	2349.2	0.0105	1	35.63	0.00047	R	SLDLDSIIAEVKAQYEDIAQK	S	Deamidated (NQ)	0.000000000000010000000.0			Un_BSA
1	1	K2C1_HUMAN	Keratin, type II cytoskeletal 1 OS=Homo sapiens GN=KRT1 PE=1 SV=6	15238	66137	498	498	29	29	Homo sapiens	9606	132571	1	1	1	857.374	2569.1	3	2569.12	-0.022	0	54.81	7.3e-06	R	MSGECAPNVSVSVSTSHTTISGGGSR	G	Oxidation (M)	0.20000000000000000000000000.0			Ar_BSA
1	1	K2C1_HUMAN	Keratin, type II cytoskeletal 1 OS=Homo sapiens GN=KRT1 PE=1 SV=6	15238	66137	498	498	29	29	Homo sapiens	9606	132572	1	1	1	857.376	2569.11	3	2569.12	-0.0151	0	50.74	1.7e-05	R	MSGECAPNVSVSVSTSHTTISGGGSR	G	Oxidation (M)	0.20000000000000000000000000.0			N2_NoBSA
1	1	K2C1_HUMAN	Keratin, type II cytoskeletal 1 OS=Homo sapiens GN=KRT1 PE=1 SV=6	15238	66137	498	498	29	29	Homo sapiens	9606	132573	1	1	1	857.376	2569.11	3	2569.12	-0.0149	0	36.47	0.00038	R	MSGECAPNVSVSVSTSHTTISGGGSR	G	Oxidation (M)	0.20000000000000000000000000.0			NoBSA
1	1	K2C1_HUMAN	Keratin, type II cytoskeletal 1 OS=Homo sapiens GN=KRT1 PE=1 SV=6	15238	66137	498	498	29	29	Homo sapiens	9606	132574	1	1	1	857.377	2569.11	3	2569.12	-0.0114	0	34.1	0.00063	R	MSGECAPNVSVSVSTSHTTISGGGSR	G	Oxidation (M)	0.20000000000000000000000000.0			Un_NoBSA
1	1	K2C1_HUMAN	Keratin, type II cytoskeletal 1 OS=Homo sapiens GN=KRT1 PE=1 SV=6	15238	66137	498	498	29	29	Homo sapiens	9606	132575	1	1	1	857.386	2569.14	3	2569.12	0.0157	0	49.55	6e-05	R	MSGECAPNVSVSVSTSHTTISGGGSR	G	Oxidation (M)	0.20000000000000000000000000.0			Ar_BSA
1	1	K2C1_HUMAN	Keratin, type II cytoskeletal 1 OS=Homo sapiens GN=KRT1 PE=1 SV=6	15238	66137	498	498	29	29	Homo sapiens	9606	136319	1	1	1	978.169	2931.49	3	2931.51	-0.0226	1	36.71	0.00055	R	FLEQQNQVLQTKWELLQQVDTSTR	T					Un_NoBSA
1	1	K2C1_HUMAN	Keratin, type II cytoskeletal 1 OS=Homo sapiens GN=KRT1 PE=1 SV=6	15238	66137	498	498	29	29	Homo sapiens	9606	136358	1	1	1	978.503	2932.49	3	2932.49	-0.0063	1	50.89	0.00024	R	FLEQQNQVLQTKWELLQQVDTSTR	T	Deamidated (NQ)	0.000000000100000000000000.0			BSA
1	1	K2C1_HUMAN	Keratin, type II cytoskeletal 1 OS=Homo sapiens GN=KRT1 PE=1 SV=6	15238	66137	498	498	29	29	Homo sapiens	9606	136359	1	1	1	978.507	2932.5	3	2932.49	0.0067	1	38.25	0.0037	R	FLEQQNQVLQTKWELLQQVDTSTR	T	Deamidated (NQ)	0.000000000100000000000000.0			NoBSA
1	1	K2C1_HUMAN	Keratin, type II cytoskeletal 1 OS=Homo sapiens GN=KRT1 PE=1 SV=6	15238	66137	498	498	29	29	Homo sapiens	9606	140846	1	1	1	1104.76	3311.27	3	3311.3	-0.0298	0	69.55	3.1e-07	R	GSYGSGGSSYGSGGGSYGSGGGGGGHGSYGSGSSSGGYR	G					Nh3_NoBSA
1	1	K2C1_HUMAN	Keratin, type II cytoskeletal 1 OS=Homo sapiens GN=KRT1 PE=1 SV=6	15238	66137	498	498	29	29	Homo sapiens	9606	140847	1	1	1	1104.77	3311.27	3	3311.3	-0.0277	0	49.09	3.6e-05	R	GSYGSGGSSYGSGGGSYGSGGGGGGHGSYGSGSSSGGYR	G					Un_BSA
1	2	K22E_HUMAN	Keratin, type II cytoskeletal 2 epidermal OS=Homo sapiens GN=KRT2 PE=1 SV=2	6590	65623	244	244	21	21	Homo sapiens	9606	51610	1	0	1	597.316	1192.62	2	1192.61	0.0078	0	37.96	0.003	K	YEELQVTVGR	H					Nh3_NoBSA
1	2	K22E_HUMAN	Keratin, type II cytoskeletal 2 epidermal OS=Homo sapiens GN=KRT2 PE=1 SV=2	6590	65623	244	244	21	21	Homo sapiens	9606	51542	1	0	1	597.316	1192.62	2	1192.61	0.0091	0	47.07	0.00035	K	YEELQVTVGR	H					BSA
1	2	K22E_HUMAN	Keratin, type II cytoskeletal 2 epidermal OS=Homo sapiens GN=KRT2 PE=1 SV=2	6590	65623	244	244	21	21	Homo sapiens	9606	51745	1	0	1	597.317	1192.62	2	1192.61	0.0112	0	35.08	0.0034	K	YEELQVTVGR	H					N2_NoBSA
1	2	K22E_HUMAN	Keratin, type II cytoskeletal 2 epidermal OS=Homo sapiens GN=KRT2 PE=1 SV=2	6590	65623	244	244	21	21	Homo sapiens	9606	128875	1	0	1	597.317	1192.62	2	1192.61	0.0116	0	56.79	7e-05	K	YEELQVTVGR	H					N2_BSA
1	2	K22E_HUMAN	Keratin, type II cytoskeletal 2 epidermal OS=Homo sapiens GN=KRT2 PE=1 SV=2	6590	65623	244	244	21	21	Homo sapiens	9606	51545	1	0	1	597.317	1192.62	2	1192.61	0.0116	0	36.65	0.0019	K	YEELQVTVGR	H					Un_NoBSA
1	2	K22E_HUMAN	Keratin, type II cytoskeletal 2 epidermal OS=Homo sapiens GN=KRT2 PE=1 SV=2	6590	65623	244	244	21	21	Homo sapiens	9606	51837	1	0	1	597.799	1193.58	2	1193.59	-0.0092	0	40.99	0.00071	K	YEELQVTVGR	H	Deamidated (NQ)	0.0000100000.0			Un_BSA
1	2	K22E_HUMAN	Keratin, type II cytoskeletal 2 epidermal OS=Homo sapiens GN=KRT2 PE=1 SV=2	6590	65623	244	244	21	21	Homo sapiens	9606	51840	1	0	1	597.799	1193.58	2	1193.59	-0.0087	0	29.71	0.0082	K	YEELQVTVGR	H	Deamidated (NQ)	0.0000100000.0			Ar_NoBSA
1	2	K22E_HUMAN	Keratin, type II cytoskeletal 2 epidermal OS=Homo sapiens GN=KRT2 PE=1 SV=2	6590	65623	244	244	21	21	Homo sapiens	9606	51844	1	0	1	597.8	1193.59	2	1193.59	-0.007	0	39.74	0.0011	K	YEELQVTVGR	H	Deamidated (NQ)	0.0000100000.0			Nh3_BSA
1	2	K22E_HUMAN	Keratin, type II cytoskeletal 2 epidermal OS=Homo sapiens GN=KRT2 PE=1 SV=2	6590	65623	244	244	21	21	Homo sapiens	9606	51848	1	0	1	597.801	1193.59	2	1193.59	-0.0061	0	29.46	0.0082	K	YEELQVTVGR	H	Deamidated (NQ)	0.0000100000.0			Ar_BSA
1	2	K22E_HUMAN	Keratin, type II cytoskeletal 2 epidermal OS=Homo sapiens GN=KRT2 PE=1 SV=2	6590	65623	244	244	21	21	Homo sapiens	9606	51849	1	0	1	597.801	1193.59	2	1193.59	-0.0061	0	31.6	0.0062	K	YEELQVTVGR	H	Deamidated (NQ)	0.0000100000.0			N2_BSA
1	2	K22E_HUMAN	Keratin, type II cytoskeletal 2 epidermal OS=Homo sapiens GN=KRT2 PE=1 SV=2	6590	65623	244	244	21	21	Homo sapiens	9606	51852	1	0	1	597.801	1193.59	2	1193.59	-0.0053	0	33.54	0.0037	K	YEELQVTVGR	H	Deamidated (NQ)	0.0000100000.0			Un_NoBSA
1	2	K22E_HUMAN	Keratin, type II cytoskeletal 2 epidermal OS=Homo sapiens GN=KRT2 PE=1 SV=2	6590	65623	244	244	21	21	Homo sapiens	9606	51854	1	0	1	597.802	1193.59	2	1193.59	-0.0044	0	32.83	0.0046	K	YEELQVTVGR	H	Deamidated (NQ)	0.0000100000.0			Nh3_NoBSA
1	2	K22E_HUMAN	Keratin, type II cytoskeletal 2 epidermal OS=Homo sapiens GN=KRT2 PE=1 SV=2	6590	65623	244	244	21	21	Homo sapiens	9606	51855	1	0	1	597.802	1193.59	2	1193.59	-0.0043	0	28.2	0.0086	K	YEELQVTVGR	H	Deamidated (NQ)	0.0000100000.0			N2_NoBSA
1	2	K22E_HUMAN	Keratin, type II cytoskeletal 2 epidermal OS=Homo sapiens GN=KRT2 PE=1 SV=2	6590	65623	244	244	21	21	Homo sapiens	9606	51856	1	0	1	597.802	1193.59	2	1193.59	-0.003	0	32.47	0.0015	K	YEELQVTVGR	H	Deamidated (NQ)	0.0000100000.0			BSA
1	2	K22E_HUMAN	Keratin, type II cytoskeletal 2 epidermal OS=Homo sapiens GN=KRT2 PE=1 SV=2	6590	65623	244	244	21	21	Homo sapiens	9606	51857	1	0	1	597.802	1193.59	2	1193.59	-0.003	0	31.34	0.0057	K	YEELQVTVGR	H	Deamidated (NQ)	0.0000100000.0			BSA
1	2	K22E_HUMAN	Keratin, type II cytoskeletal 2 epidermal OS=Homo sapiens GN=KRT2 PE=1 SV=2	6590	65623	244	244	21	21	Homo sapiens	9606	51860	1	0	1	597.803	1193.59	2	1193.59	-0.002	0	33.09	0.0041	K	YEELQVTVGR	H	Deamidated (NQ)	0.0000100000.0			Nh3_NoBSA
1	2	K22E_HUMAN	Keratin, type II cytoskeletal 2 epidermal OS=Homo sapiens GN=KRT2 PE=1 SV=2	6590	65623	244	244	21	21	Homo sapiens	9606	51861	1	0	1	597.803	1193.59	2	1193.59	-0.0019	0	32.28	0.0045	K	YEELQVTVGR	H	Deamidated (NQ)	0.0000100000.0			NoBSA
1	2	K22E_HUMAN	Keratin, type II cytoskeletal 2 epidermal OS=Homo sapiens GN=KRT2 PE=1 SV=2	6590	65623	244	244	21	21	Homo sapiens	9606	51863	1	0	1	597.804	1193.59	2	1193.59	-0.0002	0	31.54	0.0058	K	YEELQVTVGR	H	Deamidated (NQ)	0.0000100000.0			Ar_NoBSA
1	2	K22E_HUMAN	Keratin, type II cytoskeletal 2 epidermal OS=Homo sapiens GN=KRT2 PE=1 SV=2	6590	65623	244	244	21	21	Homo sapiens	9606	52103	1	0	1	598.808	1195.6	2	1195.59	0.0105	1	36.21	0.0033	K	KDVDNAYMIK	V					BSA
1	2	K22E_HUMAN	Keratin, type II cytoskeletal 2 epidermal OS=Homo sapiens GN=KRT2 PE=1 SV=2	6590	65623	244	244	21	21	Homo sapiens	9606	53575	1	0	1	604.814	1207.61	2	1207.61	0.0057	0	58.51	3.3e-06	R	TAAENDFVTLK	K					N2_BSA
1	2	K22E_HUMAN	Keratin, type II cytoskeletal 2 epidermal OS=Homo sapiens GN=KRT2 PE=1 SV=2	6590	65623	244	244	21	21	Homo sapiens	9606	53582	1	0	1	604.816	1207.62	2	1207.61	0.0083	0	55.2	2.5e-05	R	TAAENDFVTLK	K					Nh3_NoBSA
1	2	K22E_HUMAN	Keratin, type II cytoskeletal 2 epidermal OS=Homo sapiens GN=KRT2 PE=1 SV=2	6590	65623	244	244	21	21	Homo sapiens	9606	53583	1	0	1	604.817	1207.62	2	1207.61	0.0115	0	55.37	8.8e-06	R	TAAENDFVTLK	K					Nh3_NoBSA
1	2	K22E_HUMAN	Keratin, type II cytoskeletal 2 epidermal OS=Homo sapiens GN=KRT2 PE=1 SV=2	6590	65623	244	244	21	21	Homo sapiens	9606	53584	1	0	1	604.817	1207.62	2	1207.61	0.0119	0	51.03	1.6e-05	R	TAAENDFVTLK	K					N2_BSA
1	2	K22E_HUMAN	Keratin, type II cytoskeletal 2 epidermal OS=Homo sapiens GN=KRT2 PE=1 SV=2	6590	65623	244	244	21	21	Homo sapiens	9606	60687	1	0	0	632.347	1262.68	2	1262.69	-0.0073	0	80.78	2.7e-07	K	LALDVEIATYR	K					Nh3_NoBSA
1	2	K22E_HUMAN	Keratin, type II cytoskeletal 2 epidermal OS=Homo sapiens GN=KRT2 PE=1 SV=2	6590	65623	244	244	21	21	Homo sapiens	9606	60691	1	0	0	632.352	1262.69	2	1262.69	0.003	0	45.89	0.00072	K	LALDVEIATYR	K					NoBSA
1	2	K22E_HUMAN	Keratin, type II cytoskeletal 2 epidermal OS=Homo sapiens GN=KRT2 PE=1 SV=2	6590	65623	244	244	21	21	Homo sapiens	9606	60692	1	0	0	632.353	1262.69	2	1262.69	0.0047	0	73.67	1.2e-06	K	LALDVEIATYR	K					Ar_BSA
1	2	K22E_HUMAN	Keratin, type II cytoskeletal 2 epidermal OS=Homo sapiens GN=KRT2 PE=1 SV=2	6590	65623	244	244	21	21	Homo sapiens	9606	60696	1	0	0	632.354	1262.69	2	1262.69	0.0063	0	52.8	0.00014	K	LALDVEIATYR	K					Un_NoBSA
1	2	K22E_HUMAN	Keratin, type II cytoskeletal 2 epidermal OS=Homo sapiens GN=KRT2 PE=1 SV=2	6590	65623	244	244	21	21	Homo sapiens	9606	60697	1	0	0	632.354	1262.69	2	1262.69	0.007	0	47.8	0.00044	K	LALDVEIATYR	K					Ar_BSA
1	2	K22E_HUMAN	Keratin, type II cytoskeletal 2 epidermal OS=Homo sapiens GN=KRT2 PE=1 SV=2	6590	65623	244	244	21	21	Homo sapiens	9606	131676	1	0	0	632.355	1262.7	2	1262.69	0.0084	0	58.97	3.4e-05	K	LALDVEIATYR	K					Nh3_BSA
1	2	K22E_HUMAN	Keratin, type II cytoskeletal 2 epidermal OS=Homo sapiens GN=KRT2 PE=1 SV=2	6590	65623	244	244	21	21	Homo sapiens	9606	60699	1	0	0	632.355	1262.7	2	1262.69	0.0085	0	66.37	6.2e-06	K	LALDVEIATYR	K					Nh3_BSA
1	2	K22E_HUMAN	Keratin, type II cytoskeletal 2 epidermal OS=Homo sapiens GN=KRT2 PE=1 SV=2	6590	65623	244	244	21	21	Homo sapiens	9606	60700	1	0	0	632.355	1262.7	2	1262.69	0.0085	0	44.56	0.00078	K	LALDVEIATYR	K					BSA
1	2	K22E_HUMAN	Keratin, type II cytoskeletal 2 epidermal OS=Homo sapiens GN=KRT2 PE=1 SV=2	6590	65623	244	244	21	21	Homo sapiens	9606	60459	1	0	0	632.355	1262.7	2	1262.69	0.0091	0	55.47	7.5e-05	K	LALDVEIATYR	K					Ar_NoBSA
1	2	K22E_HUMAN	Keratin, type II cytoskeletal 2 epidermal OS=Homo sapiens GN=KRT2 PE=1 SV=2	6590	65623	244	244	21	21	Homo sapiens	9606	60702	1	0	0	632.356	1262.7	2	1262.69	0.01	0	74.95	9e-07	K	LALDVEIATYR	K					Ar_NoBSA
1	2	K22E_HUMAN	Keratin, type II cytoskeletal 2 epidermal OS=Homo sapiens GN=KRT2 PE=1 SV=2	6590	65623	244	244	21	21	Homo sapiens	9606	131678	1	0	0	632.356	1262.7	2	1262.69	0.0101	0	83.1	1.3e-07	K	LALDVEIATYR	K					Un_BSA
1	2	K22E_HUMAN	Keratin, type II cytoskeletal 2 epidermal OS=Homo sapiens GN=KRT2 PE=1 SV=2	6590	65623	244	244	21	21	Homo sapiens	9606	60703	1	0	0	632.356	1262.7	2	1262.69	0.0106	0	70.12	2.6e-06	K	LALDVEIATYR	K					N2_NoBSA
1	2	K22E_HUMAN	Keratin, type II cytoskeletal 2 epidermal OS=Homo sapiens GN=KRT2 PE=1 SV=2	6590	65623	244	244	21	21	Homo sapiens	9606	69362	1	0	1	665.322	1328.63	2	1328.63	-0.0016	0	77.46	5.5e-08	K	NVQDAIADAEQR	G					Ar_BSA
1	2	K22E_HUMAN	Keratin, type II cytoskeletal 2 epidermal OS=Homo sapiens GN=KRT2 PE=1 SV=2	6590	65623	244	244	21	21	Homo sapiens	9606	69366	1	0	1	665.326	1328.64	2	1328.63	0.0053	0	72.95	2.2e-07	K	NVQDAIADAEQR	G					Nh3_NoBSA
1	2	K22E_HUMAN	Keratin, type II cytoskeletal 2 epidermal OS=Homo sapiens GN=KRT2 PE=1 SV=2	6590	65623	244	244	21	21	Homo sapiens	9606	69367	1	0	1	665.326	1328.64	2	1328.63	0.0055	0	72.81	1.5e-07	K	NVQDAIADAEQR	G					N2_BSA
1	2	K22E_HUMAN	Keratin, type II cytoskeletal 2 epidermal OS=Homo sapiens GN=KRT2 PE=1 SV=2	6590	65623	244	244	21	21	Homo sapiens	9606	69368	1	0	1	665.326	1328.64	2	1328.63	0.0061	0	61.68	1.6e-06	K	NVQDAIADAEQR	G					Ar_NoBSA
1	2	K22E_HUMAN	Keratin, type II cytoskeletal 2 epidermal OS=Homo sapiens GN=KRT2 PE=1 SV=2	6590	65623	244	244	21	21	Homo sapiens	9606	69369	1	0	1	665.326	1328.64	2	1328.63	0.0062	0	64.65	2.7e-06	K	NVQDAIADAEQR	G					Nh3_NoBSA
1	2	K22E_HUMAN	Keratin, type II cytoskeletal 2 epidermal OS=Homo sapiens GN=KRT2 PE=1 SV=2	6590	65623	244	244	21	21	Homo sapiens	9606	69372	1	0	1	665.327	1328.64	2	1328.63	0.0071	0	73.95	1.8e-07	K	NVQDAIADAEQR	G					NoBSA
1	2	K22E_HUMAN	Keratin, type II cytoskeletal 2 epidermal OS=Homo sapiens GN=KRT2 PE=1 SV=2	6590	65623	244	244	21	21	Homo sapiens	9606	69373	1	0	1	665.328	1328.64	2	1328.63	0.0088	0	73.21	2.8e-07	K	NVQDAIADAEQR	G					Un_BSA
1	2	K22E_HUMAN	Keratin, type II cytoskeletal 2 epidermal OS=Homo sapiens GN=KRT2 PE=1 SV=2	6590	65623	244	244	21	21	Homo sapiens	9606	69374	1	0	1	665.328	1328.64	2	1328.63	0.0091	0	77.18	9.4e-08	K	NVQDAIADAEQR	G					BSA
1	2	K22E_HUMAN	Keratin, type II cytoskeletal 2 epidermal OS=Homo sapiens GN=KRT2 PE=1 SV=2	6590	65623	244	244	21	21	Homo sapiens	9606	69375	1	0	1	665.328	1328.64	2	1328.63	0.0093	0	80.85	7.6e-08	K	NVQDAIADAEQR	G					N2_NoBSA
1	2	K22E_HUMAN	Keratin, type II cytoskeletal 2 epidermal OS=Homo sapiens GN=KRT2 PE=1 SV=2	6590	65623	244	244	21	21	Homo sapiens	9606	69376	1	0	1	665.328	1328.64	2	1328.63	0.0094	0	72.83	1.7e-07	K	NVQDAIADAEQR	G					Nh3_BSA
1	2	K22E_HUMAN	Keratin, type II cytoskeletal 2 epidermal OS=Homo sapiens GN=KRT2 PE=1 SV=2	6590	65623	244	244	21	21	Homo sapiens	9606	69377	1	0	1	665.328	1328.64	2	1328.63	0.0097	0	77.39	1.2e-07	K	NVQDAIADAEQR	G					N2_NoBSA
1	2	K22E_HUMAN	Keratin, type II cytoskeletal 2 epidermal OS=Homo sapiens GN=KRT2 PE=1 SV=2	6590	65623	244	244	21	21	Homo sapiens	9606	69378	1	0	1	665.328	1328.64	2	1328.63	0.01	0	75.5	2.7e-07	K	NVQDAIADAEQR	G					N2_NoBSA
1	2	K22E_HUMAN	Keratin, type II cytoskeletal 2 epidermal OS=Homo sapiens GN=KRT2 PE=1 SV=2	6590	65623	244	244	21	21	Homo sapiens	9606	69379	1	0	1	665.328	1328.64	2	1328.63	0.0105	0	77.34	9.9e-08	K	NVQDAIADAEQR	G					Un_BSA
1	2	K22E_HUMAN	Keratin, type II cytoskeletal 2 epidermal OS=Homo sapiens GN=KRT2 PE=1 SV=2	6590	65623	244	244	21	21	Homo sapiens	9606	69382	1	0	1	665.329	1328.64	2	1328.63	0.0117	0	86.4	2.1e-08	K	NVQDAIADAEQR	G					N2_BSA
1	2	K22E_HUMAN	Keratin, type II cytoskeletal 2 epidermal OS=Homo sapiens GN=KRT2 PE=1 SV=2	6590	65623	244	244	21	21	Homo sapiens	9606	69383	1	0	1	665.329	1328.64	2	1328.63	0.012	0	79.74	8.7e-08	K	NVQDAIADAEQR	G					Un_NoBSA
1	2	K22E_HUMAN	Keratin, type II cytoskeletal 2 epidermal OS=Homo sapiens GN=KRT2 PE=1 SV=2	6590	65623	244	244	21	21	Homo sapiens	9606	69384	1	0	1	665.33	1328.64	2	1328.63	0.0124	0	73.01	2.7e-07	K	NVQDAIADAEQR	G					BSA
1	2	K22E_HUMAN	Keratin, type II cytoskeletal 2 epidermal OS=Homo sapiens GN=KRT2 PE=1 SV=2	6590	65623	244	244	21	21	Homo sapiens	9606	69385	1	0	1	665.33	1328.64	2	1328.63	0.0127	0	84.03	4.1e-08	K	NVQDAIADAEQR	G					Un_BSA
1	2	K22E_HUMAN	Keratin, type II cytoskeletal 2 epidermal OS=Homo sapiens GN=KRT2 PE=1 SV=2	6590	65623	244	244	21	21	Homo sapiens	9606	69438	1	0	0	665.367	1328.72	2	1328.72	0.0015	0	55.02	0.0001	R	NLDLDSIIAEVK	A					Un_NoBSA
1	2	K22E_HUMAN	Keratin, type II cytoskeletal 2 epidermal OS=Homo sapiens GN=KRT2 PE=1 SV=2	6590	65623	244	244	21	21	Homo sapiens	9606	69440	1	0	0	665.369	1328.72	2	1328.72	0.0039	0	60.53	2.9e-05	R	NLDLDSIIAEVK	A					N2_NoBSA
1	2	K22E_HUMAN	Keratin, type II cytoskeletal 2 epidermal OS=Homo sapiens GN=KRT2 PE=1 SV=2	6590	65623	244	244	21	21	Homo sapiens	9606	69441	1	0	0	665.369	1328.72	2	1328.72	0.0047	0	35.09	0.0016	R	NLDLDSIIAEVK	A					Nh3_BSA
1	2	K22E_HUMAN	Keratin, type II cytoskeletal 2 epidermal OS=Homo sapiens GN=KRT2 PE=1 SV=2	6590	65623	244	244	21	21	Homo sapiens	9606	69442	1	0	0	665.369	1328.72	2	1328.72	0.0053	0	47.81	9.7e-05	R	NLDLDSIIAEVK	A					Ar_NoBSA
1	2	K22E_HUMAN	Keratin, type II cytoskeletal 2 epidermal OS=Homo sapiens GN=KRT2 PE=1 SV=2	6590	65623	244	244	21	21	Homo sapiens	9606	69445	1	0	0	665.371	1328.73	2	1328.72	0.0091	0	42.55	0.00023	R	NLDLDSIIAEVK	A					Nh3_BSA
1	2	K22E_HUMAN	Keratin, type II cytoskeletal 2 epidermal OS=Homo sapiens GN=KRT2 PE=1 SV=2	6590	65623	244	244	21	21	Homo sapiens	9606	69446	1	0	0	665.371	1328.73	2	1328.72	0.0098	0	44.39	0.0002	R	NLDLDSIIAEVK	A					BSA
1	2	K22E_HUMAN	Keratin, type II cytoskeletal 2 epidermal OS=Homo sapiens GN=KRT2 PE=1 SV=2	6590	65623	244	244	21	21	Homo sapiens	9606	69448	1	0	0	665.372	1328.73	2	1328.72	0.0101	0	54.83	7.5e-05	R	NLDLDSIIAEVK	A					Ar_NoBSA
1	2	K22E_HUMAN	Keratin, type II cytoskeletal 2 epidermal OS=Homo sapiens GN=KRT2 PE=1 SV=2	6590	65623	244	244	21	21	Homo sapiens	9606	69449	1	0	0	665.372	1328.73	2	1328.72	0.0103	0	47.59	0.0002	R	NLDLDSIIAEVK	A					NoBSA
1	2	K22E_HUMAN	Keratin, type II cytoskeletal 2 epidermal OS=Homo sapiens GN=KRT2 PE=1 SV=2	6590	65623	244	244	21	21	Homo sapiens	9606	69450	1	0	0	665.372	1328.73	2	1328.72	0.0113	0	55.66	9e-05	R	NLDLDSIIAEVK	A					Ar_BSA
1	2	K22E_HUMAN	Keratin, type II cytoskeletal 2 epidermal OS=Homo sapiens GN=KRT2 PE=1 SV=2	6590	65623	244	244	21	21	Homo sapiens	9606	69451	1	0	0	665.372	1328.73	2	1328.72	0.0116	0	41.94	0.00045	R	NLDLDSIIAEVK	A					Un_NoBSA
1	2	K22E_HUMAN	Keratin, type II cytoskeletal 2 epidermal OS=Homo sapiens GN=KRT2 PE=1 SV=2	6590	65623	244	244	21	21	Homo sapiens	9606	69452	1	0	0	665.373	1328.73	2	1328.72	0.0128	0	57.15	6.3e-05	R	NLDLDSIIAEVK	A					BSA
1	2	K22E_HUMAN	Keratin, type II cytoskeletal 2 epidermal OS=Homo sapiens GN=KRT2 PE=1 SV=2	6590	65623	244	244	21	21	Homo sapiens	9606	69528	1	0	0	665.864	1329.71	2	1329.7	0.0097	0	60.92	3.2e-05	R	NLDLDSIIAEVK	A	Deamidated (NQ)	0.100000000000.0			Nh3_BSA
1	2	K22E_HUMAN	Keratin, type II cytoskeletal 2 epidermal OS=Homo sapiens GN=KRT2 PE=1 SV=2	6590	65623	244	244	21	21	Homo sapiens	9606	69529	1	0	0	665.864	1329.71	2	1329.7	0.0115	0	50.91	0.00032	R	NLDLDSIIAEVK	A	Deamidated (NQ)	0.100000000000.0			Ar_BSA
1	2	K22E_HUMAN	Keratin, type II cytoskeletal 2 epidermal OS=Homo sapiens GN=KRT2 PE=1 SV=2	6590	65623	244	244	21	21	Homo sapiens	9606	70391	1	0	1	668.861	1335.71	2	1335.7	0.0044	1	73.27	1.3e-07	R	TAAENDFVTLKK	D					Ar_BSA
1	2	K22E_HUMAN	Keratin, type II cytoskeletal 2 epidermal OS=Homo sapiens GN=KRT2 PE=1 SV=2	6590	65623	244	244	21	21	Homo sapiens	9606	70392	1	0	1	668.862	1335.71	2	1335.7	0.0054	1	62.07	1.5e-06	R	TAAENDFVTLKK	D					BSA
1	2	K22E_HUMAN	Keratin, type II cytoskeletal 2 epidermal OS=Homo sapiens GN=KRT2 PE=1 SV=2	6590	65623	244	244	21	21	Homo sapiens	9606	70393	1	0	1	668.862	1335.71	2	1335.7	0.006	1	67.86	9e-07	R	TAAENDFVTLKK	D					Nh3_NoBSA
1	2	K22E_HUMAN	Keratin, type II cytoskeletal 2 epidermal OS=Homo sapiens GN=KRT2 PE=1 SV=2	6590	65623	244	244	21	21	Homo sapiens	9606	70394	1	0	1	668.862	1335.71	2	1335.7	0.0065	1	92.26	5.2e-09	R	TAAENDFVTLKK	D					NoBSA
1	2	K22E_HUMAN	Keratin, type II cytoskeletal 2 epidermal OS=Homo sapiens GN=KRT2 PE=1 SV=2	6590	65623	244	244	21	21	Homo sapiens	9606	70395	1	0	1	668.862	1335.71	2	1335.7	0.0071	1	63.64	1.1e-06	R	TAAENDFVTLKK	D					Ar_BSA
1	2	K22E_HUMAN	Keratin, type II cytoskeletal 2 epidermal OS=Homo sapiens GN=KRT2 PE=1 SV=2	6590	65623	244	244	21	21	Homo sapiens	9606	70396	1	0	1	668.863	1335.71	2	1335.7	0.0076	1	63.54	1.6e-06	R	TAAENDFVTLKK	D					N2_NoBSA
1	2	K22E_HUMAN	Keratin, type II cytoskeletal 2 epidermal OS=Homo sapiens GN=KRT2 PE=1 SV=2	6590	65623	244	244	21	21	Homo sapiens	9606	70397	1	0	1	668.863	1335.71	2	1335.7	0.0077	1	80.54	2.8e-08	R	TAAENDFVTLKK	D					Un_BSA
1	2	K22E_HUMAN	Keratin, type II cytoskeletal 2 epidermal OS=Homo sapiens GN=KRT2 PE=1 SV=2	6590	65623	244	244	21	21	Homo sapiens	9606	70398	1	0	1	668.863	1335.71	2	1335.7	0.0081	1	72.91	1.5e-07	R	TAAENDFVTLKK	D					NoBSA
1	2	K22E_HUMAN	Keratin, type II cytoskeletal 2 epidermal OS=Homo sapiens GN=KRT2 PE=1 SV=2	6590	65623	244	244	21	21	Homo sapiens	9606	70399	1	0	1	668.864	1335.71	2	1335.7	0.009	1	52.16	1.3e-05	R	TAAENDFVTLKK	D					N2_BSA
1	2	K22E_HUMAN	Keratin, type II cytoskeletal 2 epidermal OS=Homo sapiens GN=KRT2 PE=1 SV=2	6590	65623	244	244	21	21	Homo sapiens	9606	70400	1	0	1	668.864	1335.71	2	1335.7	0.0095	1	60.09	2.7e-06	R	TAAENDFVTLKK	D					Un_NoBSA
1	2	K22E_HUMAN	Keratin, type II cytoskeletal 2 epidermal OS=Homo sapiens GN=KRT2 PE=1 SV=2	6590	65623	244	244	21	21	Homo sapiens	9606	70401	1	0	1	668.864	1335.71	2	1335.7	0.0107	1	50.67	3.3e-05	R	TAAENDFVTLKK	D					N2_NoBSA
1	2	K22E_HUMAN	Keratin, type II cytoskeletal 2 epidermal OS=Homo sapiens GN=KRT2 PE=1 SV=2	6590	65623	244	244	21	21	Homo sapiens	9606	70402	1	0	1	668.865	1335.71	2	1335.7	0.0115	1	66.95	5.3e-07	R	TAAENDFVTLKK	D					BSA
1	2	K22E_HUMAN	Keratin, type II cytoskeletal 2 epidermal OS=Homo sapiens GN=KRT2 PE=1 SV=2	6590	65623	244	244	21	21	Homo sapiens	9606	70403	1	0	1	668.865	1335.71	2	1335.7	0.0116	1	50.56	1.8e-05	R	TAAENDFVTLKK	D					Ar_NoBSA
1	2	K22E_HUMAN	Keratin, type II cytoskeletal 2 epidermal OS=Homo sapiens GN=KRT2 PE=1 SV=2	6590	65623	244	244	21	21	Homo sapiens	9606	70404	1	0	1	668.865	1335.72	2	1335.7	0.0117	1	64.62	8.7e-07	R	TAAENDFVTLKK	D					Nh3_BSA
1	2	K22E_HUMAN	Keratin, type II cytoskeletal 2 epidermal OS=Homo sapiens GN=KRT2 PE=1 SV=2	6590	65623	244	244	21	21	Homo sapiens	9606	70405	1	0	1	668.865	1335.72	2	1335.7	0.0117	1	65.5	7.2e-07	R	TAAENDFVTLKK	D					BSA
1	2	K22E_HUMAN	Keratin, type II cytoskeletal 2 epidermal OS=Homo sapiens GN=KRT2 PE=1 SV=2	6590	65623	244	244	21	21	Homo sapiens	9606	70406	1	0	1	668.865	1335.72	2	1335.7	0.0121	1	68.93	3.4e-07	R	TAAENDFVTLKK	D					Nh3_NoBSA
1	2	K22E_HUMAN	Keratin, type II cytoskeletal 2 epidermal OS=Homo sapiens GN=KRT2 PE=1 SV=2	6590	65623	244	244	21	21	Homo sapiens	9606	70407	1	0	1	668.865	1335.72	2	1335.7	0.0121	1	64.13	9.7e-07	R	TAAENDFVTLKK	D					Un_NoBSA
1	2	K22E_HUMAN	Keratin, type II cytoskeletal 2 epidermal OS=Homo sapiens GN=KRT2 PE=1 SV=2	6590	65623	244	244	21	21	Homo sapiens	9606	70408	1	0	1	668.865	1335.72	2	1335.7	0.0122	1	47.75	3.3e-05	R	TAAENDFVTLKK	D					BSA
1	2	K22E_HUMAN	Keratin, type II cytoskeletal 2 epidermal OS=Homo sapiens GN=KRT2 PE=1 SV=2	6590	65623	244	244	21	21	Homo sapiens	9606	70409	1	0	1	668.865	1335.72	2	1335.7	0.0131	1	51.32	1.5e-05	R	TAAENDFVTLKK	D					N2_NoBSA
1	2	K22E_HUMAN	Keratin, type II cytoskeletal 2 epidermal OS=Homo sapiens GN=KRT2 PE=1 SV=2	6590	65623	244	244	21	21	Homo sapiens	9606	70410	1	0	1	668.866	1335.72	2	1335.7	0.0132	1	69.32	3.2e-07	R	TAAENDFVTLKK	D					Un_BSA
1	2	K22E_HUMAN	Keratin, type II cytoskeletal 2 epidermal OS=Homo sapiens GN=KRT2 PE=1 SV=2	6590	65623	244	244	21	21	Homo sapiens	9606	70411	1	0	1	668.866	1335.72	2	1335.7	0.0133	1	63.13	4.4e-06	R	TAAENDFVTLKK	D					Nh3_NoBSA
1	2	K22E_HUMAN	Keratin, type II cytoskeletal 2 epidermal OS=Homo sapiens GN=KRT2 PE=1 SV=2	6590	65623	244	244	21	21	Homo sapiens	9606	71346	1	0	1	672.384	1342.75	2	1342.75	0.0084	1	34.51	0.0063	K	EIKIEISELNR	V					Ar_BSA
1	2	K22E_HUMAN	Keratin, type II cytoskeletal 2 epidermal OS=Homo sapiens GN=KRT2 PE=1 SV=2	6590	65623	244	244	21	21	Homo sapiens	9606	117965	1	0	1	682.863	1363.71	2	1363.71	0.0019	1	42.59	0.0008	K	RTAAENDFVTLK	K					N2_NoBSA
1	2	K22E_HUMAN	Keratin, type II cytoskeletal 2 epidermal OS=Homo sapiens GN=KRT2 PE=1 SV=2	6590	65623	244	244	21	21	Homo sapiens	9606	73744	1	0	1	682.863	1363.71	2	1363.71	0.0025	1	60.99	2e-05	K	RTAAENDFVTLK	K					N2_BSA
1	2	K22E_HUMAN	Keratin, type II cytoskeletal 2 epidermal OS=Homo sapiens GN=KRT2 PE=1 SV=2	6590	65623	244	244	21	21	Homo sapiens	9606	117956	1	0	1	682.864	1363.71	2	1363.71	0.0034	1	57.25	5e-05	K	RTAAENDFVTLK	K					NoBSA
1	2	K22E_HUMAN	Keratin, type II cytoskeletal 2 epidermal OS=Homo sapiens GN=KRT2 PE=1 SV=2	6590	65623	244	244	21	21	Homo sapiens	9606	73745	1	0	1	682.864	1363.71	2	1363.71	0.0038	1	53.07	7.2e-05	K	RTAAENDFVTLK	K					Nh3_NoBSA
1	2	K22E_HUMAN	Keratin, type II cytoskeletal 2 epidermal OS=Homo sapiens GN=KRT2 PE=1 SV=2	6590	65623	244	244	21	21	Homo sapiens	9606	73746	1	0	1	682.864	1363.71	2	1363.71	0.004	1	56.21	2.3e-05	K	RTAAENDFVTLK	K					Nh3_BSA
1	2	K22E_HUMAN	Keratin, type II cytoskeletal 2 epidermal OS=Homo sapiens GN=KRT2 PE=1 SV=2	6590	65623	244	244	21	21	Homo sapiens	9606	73747	1	0	1	682.864	1363.71	2	1363.71	0.0046	1	41.99	0.00022	K	RTAAENDFVTLK	K					Ar_BSA
1	2	K22E_HUMAN	Keratin, type II cytoskeletal 2 epidermal OS=Homo sapiens GN=KRT2 PE=1 SV=2	6590	65623	244	244	21	21	Homo sapiens	9606	73748	1	0	1	682.865	1363.71	2	1363.71	0.0054	1	49.38	9.3e-05	K	RTAAENDFVTLK	K					Un_BSA
1	2	K22E_HUMAN	Keratin, type II cytoskeletal 2 epidermal OS=Homo sapiens GN=KRT2 PE=1 SV=2	6590	65623	244	244	21	21	Homo sapiens	9606	73749	1	0	1	682.865	1363.72	2	1363.71	0.0065	1	54.93	1.8e-05	K	RTAAENDFVTLK	K					N2_NoBSA
1	2	K22E_HUMAN	Keratin, type II cytoskeletal 2 epidermal OS=Homo sapiens GN=KRT2 PE=1 SV=2	6590	65623	244	244	21	21	Homo sapiens	9606	73750	1	0	1	682.866	1363.72	2	1363.71	0.0071	1	52.16	7.2e-05	K	RTAAENDFVTLK	K					BSA
1	2	K22E_HUMAN	Keratin, type II cytoskeletal 2 epidermal OS=Homo sapiens GN=KRT2 PE=1 SV=2	6590	65623	244	244	21	21	Homo sapiens	9606	73751	1	0	1	682.866	1363.72	2	1363.71	0.0074	1	75.07	9.4e-07	K	RTAAENDFVTLK	K					BSA
1	2	K22E_HUMAN	Keratin, type II cytoskeletal 2 epidermal OS=Homo sapiens GN=KRT2 PE=1 SV=2	6590	65623	244	244	21	21	Homo sapiens	9606	73754	1	0	1	682.867	1363.72	2	1363.71	0.0095	1	50.76	3.4e-05	K	RTAAENDFVTLK	K					Un_NoBSA
1	2	K22E_HUMAN	Keratin, type II cytoskeletal 2 epidermal OS=Homo sapiens GN=KRT2 PE=1 SV=2	6590	65623	244	244	21	21	Homo sapiens	9606	73755	1	0	1	682.867	1363.72	2	1363.71	0.0095	1	29.25	0.0031	K	RTAAENDFVTLK	K					Un_BSA
1	2	K22E_HUMAN	Keratin, type II cytoskeletal 2 epidermal OS=Homo sapiens GN=KRT2 PE=1 SV=2	6590	65623	244	244	21	21	Homo sapiens	9606	73757	1	0	1	682.867	1363.72	2	1363.71	0.0104	1	40.58	0.00016	K	RTAAENDFVTLK	K					NoBSA
1	2	K22E_HUMAN	Keratin, type II cytoskeletal 2 epidermal OS=Homo sapiens GN=KRT2 PE=1 SV=2	6590	65623	244	244	21	21	Homo sapiens	9606	73758	1	0	1	682.868	1363.72	2	1363.71	0.0111	1	54.5	5e-05	K	RTAAENDFVTLK	K					BSA
1	2	K22E_HUMAN	Keratin, type II cytoskeletal 2 epidermal OS=Homo sapiens GN=KRT2 PE=1 SV=2	6590	65623	244	244	21	21	Homo sapiens	9606	73759	1	0	1	682.868	1363.72	2	1363.71	0.0112	1	75.17	9.7e-07	K	RTAAENDFVTLK	K					Nh3_NoBSA
1	2	K22E_HUMAN	Keratin, type II cytoskeletal 2 epidermal OS=Homo sapiens GN=KRT2 PE=1 SV=2	6590	65623	244	244	21	21	Homo sapiens	9606	73760	1	0	1	682.869	1363.72	2	1363.71	0.0132	1	78.06	6e-07	K	RTAAENDFVTLK	K					Nh3_BSA
1	2	K22E_HUMAN	Keratin, type II cytoskeletal 2 epidermal OS=Homo sapiens GN=KRT2 PE=1 SV=2	6590	65623	244	244	21	21	Homo sapiens	9606	73761	1	0	1	682.869	1363.72	2	1363.71	0.0133	1	74.81	9.2e-07	K	RTAAENDFVTLK	K					Un_NoBSA
1	2	K22E_HUMAN	Keratin, type II cytoskeletal 2 epidermal OS=Homo sapiens GN=KRT2 PE=1 SV=2	6590	65623	244	244	21	21	Homo sapiens	9606	74471	1	0	1	686.356	1370.7	2	1370.7	-0.0057	0	40.64	0.003	K	LNDLEEALQQAK	E					Un_NoBSA
1	2	K22E_HUMAN	Keratin, type II cytoskeletal 2 epidermal OS=Homo sapiens GN=KRT2 PE=1 SV=2	6590	65623	244	244	21	21	Homo sapiens	9606	74483	1	0	1	686.361	1370.71	2	1370.7	0.0029	0	43.04	0.00031	K	LNDLEEALQQAK	E					NoBSA
1	2	K22E_HUMAN	Keratin, type II cytoskeletal 2 epidermal OS=Homo sapiens GN=KRT2 PE=1 SV=2	6590	65623	244	244	21	21	Homo sapiens	9606	74484	1	0	1	686.361	1370.71	2	1370.7	0.0036	0	49.58	0.00045	K	LNDLEEALQQAK	E					BSA
1	2	K22E_HUMAN	Keratin, type II cytoskeletal 2 epidermal OS=Homo sapiens GN=KRT2 PE=1 SV=2	6590	65623	244	244	21	21	Homo sapiens	9606	74486	1	0	1	686.361	1370.71	2	1370.7	0.0039	0	60.99	3e-05	K	LNDLEEALQQAK	E					Un_BSA
1	2	K22E_HUMAN	Keratin, type II cytoskeletal 2 epidermal OS=Homo sapiens GN=KRT2 PE=1 SV=2	6590	65623	244	244	21	21	Homo sapiens	9606	74490	1	0	1	686.362	1370.71	2	1370.7	0.0053	0	42.92	0.0021	K	LNDLEEALQQAK	E					Nh3_BSA
1	2	K22E_HUMAN	Keratin, type II cytoskeletal 2 epidermal OS=Homo sapiens GN=KRT2 PE=1 SV=2	6590	65623	244	244	21	21	Homo sapiens	9606	74493	1	0	1	686.362	1370.71	2	1370.7	0.0056	0	40.97	0.00063	K	LNDLEEALQQAK	E					Ar_BSA
1	2	K22E_HUMAN	Keratin, type II cytoskeletal 2 epidermal OS=Homo sapiens GN=KRT2 PE=1 SV=2	6590	65623	244	244	21	21	Homo sapiens	9606	74498	1	0	1	686.363	1370.71	2	1370.7	0.0074	0	43.55	0.0017	K	LNDLEEALQQAK	E					Nh3_NoBSA
1	2	K22E_HUMAN	Keratin, type II cytoskeletal 2 epidermal OS=Homo sapiens GN=KRT2 PE=1 SV=2	6590	65623	244	244	21	21	Homo sapiens	9606	74499	1	0	1	686.363	1370.71	2	1370.7	0.008	0	65.1	4.1e-06	K	LNDLEEALQQAK	E					Un_BSA
1	2	K22E_HUMAN	Keratin, type II cytoskeletal 2 epidermal OS=Homo sapiens GN=KRT2 PE=1 SV=2	6590	65623	244	244	21	21	Homo sapiens	9606	74501	1	0	1	686.364	1370.71	2	1370.7	0.0089	0	52.36	4.7e-05	K	LNDLEEALQQAK	E					N2_NoBSA
1	2	K22E_HUMAN	Keratin, type II cytoskeletal 2 epidermal OS=Homo sapiens GN=KRT2 PE=1 SV=2	6590	65623	244	244	21	21	Homo sapiens	9606	74504	1	0	1	686.364	1370.71	2	1370.7	0.0094	0	46.01	0.00033	K	LNDLEEALQQAK	E					Nh3_NoBSA
1	2	K22E_HUMAN	Keratin, type II cytoskeletal 2 epidermal OS=Homo sapiens GN=KRT2 PE=1 SV=2	6590	65623	244	244	21	21	Homo sapiens	9606	74506	1	0	1	686.365	1370.71	2	1370.7	0.0108	0	71.44	1.8e-06	K	LNDLEEALQQAK	E					BSA
1	2	K22E_HUMAN	Keratin, type II cytoskeletal 2 epidermal OS=Homo sapiens GN=KRT2 PE=1 SV=2	6590	65623	244	244	21	21	Homo sapiens	9606	74507	1	0	1	686.365	1370.71	2	1370.7	0.0108	0	80.84	2.1e-07	K	LNDLEEALQQAK	E					BSA
1	2	K22E_HUMAN	Keratin, type II cytoskeletal 2 epidermal OS=Homo sapiens GN=KRT2 PE=1 SV=2	6590	65623	244	244	21	21	Homo sapiens	9606	74509	1	0	1	686.365	1370.72	2	1370.7	0.0119	0	63.65	2.4e-06	K	LNDLEEALQQAK	E					Ar_BSA
1	2	K22E_HUMAN	Keratin, type II cytoskeletal 2 epidermal OS=Homo sapiens GN=KRT2 PE=1 SV=2	6590	65623	244	244	21	21	Homo sapiens	9606	74510	1	0	1	686.365	1370.72	2	1370.7	0.0122	0	70.36	1e-06	K	LNDLEEALQQAK	E					Nh3_BSA
1	2	K22E_HUMAN	Keratin, type II cytoskeletal 2 epidermal OS=Homo sapiens GN=KRT2 PE=1 SV=2	6590	65623	244	244	21	21	Homo sapiens	9606	76778	1	0	0	696.395	1390.78	2	1390.78	-0.0068	1	42.22	0.00025	K	LALDVEIATYRK	L					Nh3_NoBSA
1	2	K22E_HUMAN	Keratin, type II cytoskeletal 2 epidermal OS=Homo sapiens GN=KRT2 PE=1 SV=2	6590	65623	244	244	21	21	Homo sapiens	9606	76788	1	0	0	696.405	1390.79	2	1390.78	0.0127	1	24.77	0.0048	K	LALDVEIATYRK	L					N2_NoBSA
1	2	K22E_HUMAN	Keratin, type II cytoskeletal 2 epidermal OS=Homo sapiens GN=KRT2 PE=1 SV=2	6590	65623	244	244	21	21	Homo sapiens	9606	78667	1	0	0	705.863	1409.71	2	1409.7	0.0104	1	29.09	0.0096	R	GFSSGSAVVSGGSRR	S					Un_NoBSA
1	2	K22E_HUMAN	Keratin, type II cytoskeletal 2 epidermal OS=Homo sapiens GN=KRT2 PE=1 SV=2	6590	65623	244	244	21	21	Homo sapiens	9606	136103	1	0	1	730.899	1459.78	2	1459.79	-0.0077	0	30.72	0.0051	K	VDLLNQEIEFLK	V					BSA
1	2	K22E_HUMAN	Keratin, type II cytoskeletal 2 epidermal OS=Homo sapiens GN=KRT2 PE=1 SV=2	6590	65623	244	244	21	21	Homo sapiens	9606	83654	1	0	1	730.9	1459.78	2	1459.79	-0.0074	0	48.32	0.00019	K	VDLLNQEIEFLK	V					Ar_BSA
1	2	K22E_HUMAN	Keratin, type II cytoskeletal 2 epidermal OS=Homo sapiens GN=KRT2 PE=1 SV=2	6590	65623	244	244	21	21	Homo sapiens	9606	136096	1	0	1	730.9	1459.78	2	1459.79	-0.0073	0	59.39	1.5e-05	K	VDLLNQEIEFLK	V					N2_NoBSA
1	2	K22E_HUMAN	Keratin, type II cytoskeletal 2 epidermal OS=Homo sapiens GN=KRT2 PE=1 SV=2	6590	65623	244	244	21	21	Homo sapiens	9606	136189	1	0	1	730.901	1459.79	2	1459.79	-0.0046	0	69.91	1.9e-06	K	VDLLNQEIEFLK	V					BSA
1	2	K22E_HUMAN	Keratin, type II cytoskeletal 2 epidermal OS=Homo sapiens GN=KRT2 PE=1 SV=2	6590	65623	244	244	21	21	Homo sapiens	9606	136143	1	0	1	730.901	1459.79	2	1459.79	-0.0045	0	51.96	5.4e-05	K	VDLLNQEIEFLK	V					Nh3_BSA
1	2	K22E_HUMAN	Keratin, type II cytoskeletal 2 epidermal OS=Homo sapiens GN=KRT2 PE=1 SV=2	6590	65623	244	244	21	21	Homo sapiens	9606	136149	1	0	1	730.902	1459.79	2	1459.79	-0.0033	0	40.37	0.00038	K	VDLLNQEIEFLK	V					Un_BSA
1	2	K22E_HUMAN	Keratin, type II cytoskeletal 2 epidermal OS=Homo sapiens GN=KRT2 PE=1 SV=2	6590	65623	244	244	21	21	Homo sapiens	9606	136161	1	0	1	730.902	1459.79	2	1459.79	-0.0026	0	60.11	1e-05	K	VDLLNQEIEFLK	V					BSA
1	2	K22E_HUMAN	Keratin, type II cytoskeletal 2 epidermal OS=Homo sapiens GN=KRT2 PE=1 SV=2	6590	65623	244	244	21	21	Homo sapiens	9606	83657	1	0	1	730.903	1459.79	2	1459.79	-0.0012	0	43.08	0.0011	K	VDLLNQEIEFLK	V					Ar_NoBSA
1	2	K22E_HUMAN	Keratin, type II cytoskeletal 2 epidermal OS=Homo sapiens GN=KRT2 PE=1 SV=2	6590	65623	244	244	21	21	Homo sapiens	9606	83658	1	0	1	730.903	1459.79	2	1459.79	-0.001	0	70.25	2e-06	K	VDLLNQEIEFLK	V					Un_BSA
1	2	K22E_HUMAN	Keratin, type II cytoskeletal 2 epidermal OS=Homo sapiens GN=KRT2 PE=1 SV=2	6590	65623	244	244	21	21	Homo sapiens	9606	83659	1	0	1	730.903	1459.79	2	1459.79	-0.0007	0	33.05	0.0031	K	VDLLNQEIEFLK	V					BSA
1	2	K22E_HUMAN	Keratin, type II cytoskeletal 2 epidermal OS=Homo sapiens GN=KRT2 PE=1 SV=2	6590	65623	244	244	21	21	Homo sapiens	9606	136114	1	0	1	730.903	1459.79	2	1459.79	-0.0001	0	47.06	0.00018	K	VDLLNQEIEFLK	V					Ar_BSA
1	2	K22E_HUMAN	Keratin, type II cytoskeletal 2 epidermal OS=Homo sapiens GN=KRT2 PE=1 SV=2	6590	65623	244	244	21	21	Homo sapiens	9606	136121	1	0	1	730.904	1459.79	2	1459.79	0.0003	0	60.83	1.1e-05	K	VDLLNQEIEFLK	V					Nh3_BSA
1	2	K22E_HUMAN	Keratin, type II cytoskeletal 2 epidermal OS=Homo sapiens GN=KRT2 PE=1 SV=2	6590	65623	244	244	21	21	Homo sapiens	9606	136203	1	0	1	730.904	1459.79	2	1459.79	0.0006	0	63.34	6.7e-06	K	VDLLNQEIEFLK	V					Nh3_NoBSA
1	2	K22E_HUMAN	Keratin, type II cytoskeletal 2 epidermal OS=Homo sapiens GN=KRT2 PE=1 SV=2	6590	65623	244	244	21	21	Homo sapiens	9606	83660	1	0	1	730.904	1459.79	2	1459.79	0.0011	0	64.49	5.7e-06	K	VDLLNQEIEFLK	V					Un_NoBSA
1	2	K22E_HUMAN	Keratin, type II cytoskeletal 2 epidermal OS=Homo sapiens GN=KRT2 PE=1 SV=2	6590	65623	244	244	21	21	Homo sapiens	9606	83661	1	0	1	730.904	1459.79	2	1459.79	0.0013	0	64.63	7.3e-06	K	VDLLNQEIEFLK	V					N2_BSA
1	2	K22E_HUMAN	Keratin, type II cytoskeletal 2 epidermal OS=Homo sapiens GN=KRT2 PE=1 SV=2	6590	65623	244	244	21	21	Homo sapiens	9606	83662	1	0	1	730.905	1459.79	2	1459.79	0.0025	0	70.05	2.3e-06	K	VDLLNQEIEFLK	V					Un_NoBSA
1	2	K22E_HUMAN	Keratin, type II cytoskeletal 2 epidermal OS=Homo sapiens GN=KRT2 PE=1 SV=2	6590	65623	244	244	21	21	Homo sapiens	9606	136200	1	0	1	730.905	1459.8	2	1459.79	0.0028	0	65.17	6e-06	K	VDLLNQEIEFLK	V					Ar_BSA
1	2	K22E_HUMAN	Keratin, type II cytoskeletal 2 epidermal OS=Homo sapiens GN=KRT2 PE=1 SV=2	6590	65623	244	244	21	21	Homo sapiens	9606	136226	1	0	1	730.905	1459.8	2	1459.79	0.0031	0	52.29	5.1e-05	K	VDLLNQEIEFLK	V					Nh3_NoBSA
1	2	K22E_HUMAN	Keratin, type II cytoskeletal 2 epidermal OS=Homo sapiens GN=KRT2 PE=1 SV=2	6590	65623	244	244	21	21	Homo sapiens	9606	136126	1	0	1	730.905	1459.8	2	1459.79	0.0032	0	65.12	6.3e-06	K	VDLLNQEIEFLK	V					BSA
1	2	K22E_HUMAN	Keratin, type II cytoskeletal 2 epidermal OS=Homo sapiens GN=KRT2 PE=1 SV=2	6590	65623	244	244	21	21	Homo sapiens	9606	83663	1	0	1	730.906	1459.8	2	1459.79	0.0058	0	64.96	5.4e-06	K	VDLLNQEIEFLK	V					NoBSA
1	2	K22E_HUMAN	Keratin, type II cytoskeletal 2 epidermal OS=Homo sapiens GN=KRT2 PE=1 SV=2	6590	65623	244	244	21	21	Homo sapiens	9606	83664	1	0	1	730.907	1459.8	2	1459.79	0.0064	0	70.1	2e-06	K	VDLLNQEIEFLK	V					N2_NoBSA
1	2	K22E_HUMAN	Keratin, type II cytoskeletal 2 epidermal OS=Homo sapiens GN=KRT2 PE=1 SV=2	6590	65623	244	244	21	21	Homo sapiens	9606	136173	1	0	1	730.907	1459.8	2	1459.79	0.0068	0	56.05	2.8e-05	K	VDLLNQEIEFLK	V					Nh3_NoBSA
1	2	K22E_HUMAN	Keratin, type II cytoskeletal 2 epidermal OS=Homo sapiens GN=KRT2 PE=1 SV=2	6590	65623	244	244	21	21	Homo sapiens	9606	136211	1	0	1	730.908	1459.8	2	1459.79	0.0087	0	47.77	0.00013	K	VDLLNQEIEFLK	V					N2_BSA
1	2	K22E_HUMAN	Keratin, type II cytoskeletal 2 epidermal OS=Homo sapiens GN=KRT2 PE=1 SV=2	6590	65623	244	244	21	21	Homo sapiens	9606	83665	1	0	1	730.908	1459.8	2	1459.79	0.0097	0	43.37	0.0004	K	VDLLNQEIEFLK	V					Ar_NoBSA
1	2	K22E_HUMAN	Keratin, type II cytoskeletal 2 epidermal OS=Homo sapiens GN=KRT2 PE=1 SV=2	6590	65623	244	244	21	21	Homo sapiens	9606	136196	1	0	1	730.908	1459.8	2	1459.79	0.0099	0	53.32	4.2e-05	K	VDLLNQEIEFLK	V					NoBSA
1	2	K22E_HUMAN	Keratin, type II cytoskeletal 2 epidermal OS=Homo sapiens GN=KRT2 PE=1 SV=2	6590	65623	244	244	21	21	Homo sapiens	9606	136151	1	0	1	730.91	1459.8	2	1459.79	0.0125	0	45.1	0.00039	K	VDLLNQEIEFLK	V					Nh3_NoBSA
1	2	K22E_HUMAN	Keratin, type II cytoskeletal 2 epidermal OS=Homo sapiens GN=KRT2 PE=1 SV=2	6590	65623	244	244	21	21	Homo sapiens	9606	83780	1	0	1	731.395	1460.78	2	1460.78	-0.0009	0	58.52	3.3e-06	K	VDLLNQEIEFLK	V	Deamidated (NQ)	0.000001000000.0			Ar_BSA
1	2	K22E_HUMAN	Keratin, type II cytoskeletal 2 epidermal OS=Homo sapiens GN=KRT2 PE=1 SV=2	6590	65623	244	244	21	21	Homo sapiens	9606	83781	1	0	1	731.397	1460.78	2	1460.78	0.0041	0	47.5	0.00015	K	VDLLNQEIEFLK	V	Deamidated (NQ)	0.000001000000.0			Nh3_BSA
1	2	K22E_HUMAN	Keratin, type II cytoskeletal 2 epidermal OS=Homo sapiens GN=KRT2 PE=1 SV=2	6590	65623	244	244	21	21	Homo sapiens	9606	85200	1	0	0	738.392	1474.77	2	1474.78	-0.0089	0	65.32	2.2e-06	R	FLEQQNQVLQTK	W					Nh3_NoBSA
1	2	K22E_HUMAN	Keratin, type II cytoskeletal 2 epidermal OS=Homo sapiens GN=KRT2 PE=1 SV=2	6590	65623	244	244	21	21	Homo sapiens	9606	85201	1	0	0	738.393	1474.77	2	1474.78	-0.007	0	70.54	1.2e-06	R	FLEQQNQVLQTK	W					N2_NoBSA
1	2	K22E_HUMAN	Keratin, type II cytoskeletal 2 epidermal OS=Homo sapiens GN=KRT2 PE=1 SV=2	6590	65623	244	244	21	21	Homo sapiens	9606	85202	1	0	0	738.393	1474.77	2	1474.78	-0.0068	0	72.51	6.9e-07	R	FLEQQNQVLQTK	W					NoBSA
1	2	K22E_HUMAN	Keratin, type II cytoskeletal 2 epidermal OS=Homo sapiens GN=KRT2 PE=1 SV=2	6590	65623	244	244	21	21	Homo sapiens	9606	85203	1	0	0	738.394	1474.77	2	1474.78	-0.0038	0	74.88	4.7e-07	R	FLEQQNQVLQTK	W					Nh3_NoBSA
1	2	K22E_HUMAN	Keratin, type II cytoskeletal 2 epidermal OS=Homo sapiens GN=KRT2 PE=1 SV=2	6590	65623	244	244	21	21	Homo sapiens	9606	85204	1	0	0	738.395	1474.77	2	1474.78	-0.0031	0	72.52	7.1e-07	R	FLEQQNQVLQTK	W					Ar_NoBSA
1	2	K22E_HUMAN	Keratin, type II cytoskeletal 2 epidermal OS=Homo sapiens GN=KRT2 PE=1 SV=2	6590	65623	244	244	21	21	Homo sapiens	9606	85205	1	0	0	738.395	1474.78	2	1474.78	-0.0029	0	77.23	3e-07	R	FLEQQNQVLQTK	W					NoBSA
1	2	K22E_HUMAN	Keratin, type II cytoskeletal 2 epidermal OS=Homo sapiens GN=KRT2 PE=1 SV=2	6590	65623	244	244	21	21	Homo sapiens	9606	85206	1	0	0	738.395	1474.78	2	1474.78	-0.0024	0	73.28	5.3e-07	R	FLEQQNQVLQTK	W					BSA
1	2	K22E_HUMAN	Keratin, type II cytoskeletal 2 epidermal OS=Homo sapiens GN=KRT2 PE=1 SV=2	6590	65623	244	244	21	21	Homo sapiens	9606	85208	1	0	0	738.395	1474.78	2	1474.78	-0.0015	0	72.25	6.6e-07	R	FLEQQNQVLQTK	W					BSA
1	2	K22E_HUMAN	Keratin, type II cytoskeletal 2 epidermal OS=Homo sapiens GN=KRT2 PE=1 SV=2	6590	65623	244	244	21	21	Homo sapiens	9606	85209	1	0	0	738.396	1474.78	2	1474.78	-0.0013	0	74.51	4.3e-07	R	FLEQQNQVLQTK	W					Nh3_BSA
1	2	K22E_HUMAN	Keratin, type II cytoskeletal 2 epidermal OS=Homo sapiens GN=KRT2 PE=1 SV=2	6590	65623	244	244	21	21	Homo sapiens	9606	85210	1	0	0	738.396	1474.78	2	1474.78	-0.0006	0	74.9	6e-07	R	FLEQQNQVLQTK	W					Un_BSA
1	2	K22E_HUMAN	Keratin, type II cytoskeletal 2 epidermal OS=Homo sapiens GN=KRT2 PE=1 SV=2	6590	65623	244	244	21	21	Homo sapiens	9606	85211	1	0	0	738.396	1474.78	2	1474.78	0.0004	0	71.76	6.2e-07	R	FLEQQNQVLQTK	W					BSA
1	2	K22E_HUMAN	Keratin, type II cytoskeletal 2 epidermal OS=Homo sapiens GN=KRT2 PE=1 SV=2	6590	65623	244	244	21	21	Homo sapiens	9606	85212	1	0	0	738.397	1474.78	2	1474.78	0.0006	0	72.47	7.3e-07	R	FLEQQNQVLQTK	W					Nh3_NoBSA
1	2	K22E_HUMAN	Keratin, type II cytoskeletal 2 epidermal OS=Homo sapiens GN=KRT2 PE=1 SV=2	6590	65623	244	244	21	21	Homo sapiens	9606	85213	1	0	0	738.397	1474.78	2	1474.78	0.0006	0	75.11	4.7e-07	R	FLEQQNQVLQTK	W					Un_BSA
1	2	K22E_HUMAN	Keratin, type II cytoskeletal 2 epidermal OS=Homo sapiens GN=KRT2 PE=1 SV=2	6590	65623	244	244	21	21	Homo sapiens	9606	85214	1	0	0	738.397	1474.78	2	1474.78	0.0008	0	64.71	2.7e-06	R	FLEQQNQVLQTK	W					N2_BSA
1	2	K22E_HUMAN	Keratin, type II cytoskeletal 2 epidermal OS=Homo sapiens GN=KRT2 PE=1 SV=2	6590	65623	244	244	21	21	Homo sapiens	9606	85215	1	0	0	738.397	1474.78	2	1474.78	0.0009	0	76.72	1.8e-07	R	FLEQQNQVLQTK	W					Un_BSA
1	2	K22E_HUMAN	Keratin, type II cytoskeletal 2 epidermal OS=Homo sapiens GN=KRT2 PE=1 SV=2	6590	65623	244	244	21	21	Homo sapiens	9606	85216	1	0	0	738.397	1474.78	2	1474.78	0.0012	0	65.92	2.1e-06	R	FLEQQNQVLQTK	W					Ar_BSA
1	2	K22E_HUMAN	Keratin, type II cytoskeletal 2 epidermal OS=Homo sapiens GN=KRT2 PE=1 SV=2	6590	65623	244	244	21	21	Homo sapiens	9606	85217	1	0	0	738.397	1474.78	2	1474.78	0.0015	0	69.58	9.6e-07	R	FLEQQNQVLQTK	W					N2_BSA
1	2	K22E_HUMAN	Keratin, type II cytoskeletal 2 epidermal OS=Homo sapiens GN=KRT2 PE=1 SV=2	6590	65623	244	244	21	21	Homo sapiens	9606	85218	1	0	0	738.397	1474.78	2	1474.78	0.0022	0	71.67	8.2e-07	R	FLEQQNQVLQTK	W					Un_BSA
1	2	K22E_HUMAN	Keratin, type II cytoskeletal 2 epidermal OS=Homo sapiens GN=KRT2 PE=1 SV=2	6590	65623	244	244	21	21	Homo sapiens	9606	85219	1	0	0	738.398	1474.78	2	1474.78	0.0039	0	51.72	8.3e-05	R	FLEQQNQVLQTK	W					Un_NoBSA
1	2	K22E_HUMAN	Keratin, type II cytoskeletal 2 epidermal OS=Homo sapiens GN=KRT2 PE=1 SV=2	6590	65623	244	244	21	21	Homo sapiens	9606	85220	1	0	0	738.398	1474.78	2	1474.78	0.0039	0	69.95	1.1e-06	R	FLEQQNQVLQTK	W					BSA
1	2	K22E_HUMAN	Keratin, type II cytoskeletal 2 epidermal OS=Homo sapiens GN=KRT2 PE=1 SV=2	6590	65623	244	244	21	21	Homo sapiens	9606	85221	1	0	0	738.398	1474.78	2	1474.78	0.004	0	60.84	2.6e-05	R	FLEQQNQVLQTK	W					Un_NoBSA
1	2	K22E_HUMAN	Keratin, type II cytoskeletal 2 epidermal OS=Homo sapiens GN=KRT2 PE=1 SV=2	6590	65623	244	244	21	21	Homo sapiens	9606	85222	1	0	0	738.398	1474.78	2	1474.78	0.0043	0	74.96	4.2e-07	R	FLEQQNQVLQTK	W					N2_NoBSA
1	2	K22E_HUMAN	Keratin, type II cytoskeletal 2 epidermal OS=Homo sapiens GN=KRT2 PE=1 SV=2	6590	65623	244	244	21	21	Homo sapiens	9606	85223	1	0	0	738.399	1474.78	2	1474.78	0.0044	0	51.32	8.2e-05	R	FLEQQNQVLQTK	W					Un_NoBSA
1	2	K22E_HUMAN	Keratin, type II cytoskeletal 2 epidermal OS=Homo sapiens GN=KRT2 PE=1 SV=2	6590	65623	244	244	21	21	Homo sapiens	9606	85224	1	0	0	738.399	1474.78	2	1474.78	0.0045	0	71.79	8.5e-07	R	FLEQQNQVLQTK	W					N2_NoBSA
1	2	K22E_HUMAN	Keratin, type II cytoskeletal 2 epidermal OS=Homo sapiens GN=KRT2 PE=1 SV=2	6590	65623	244	244	21	21	Homo sapiens	9606	85225	1	0	0	738.399	1474.78	2	1474.78	0.0046	0	72.52	9.5e-07	R	FLEQQNQVLQTK	W					Ar_NoBSA
1	2	K22E_HUMAN	Keratin, type II cytoskeletal 2 epidermal OS=Homo sapiens GN=KRT2 PE=1 SV=2	6590	65623	244	244	21	21	Homo sapiens	9606	85226	1	0	0	738.399	1474.78	2	1474.78	0.0047	0	72.21	8.2e-07	R	FLEQQNQVLQTK	W					Nh3_BSA
1	2	K22E_HUMAN	Keratin, type II cytoskeletal 2 epidermal OS=Homo sapiens GN=KRT2 PE=1 SV=2	6590	65623	244	244	21	21	Homo sapiens	9606	85227	1	0	0	738.399	1474.78	2	1474.78	0.0051	0	68.74	7.7e-07	R	FLEQQNQVLQTK	W					Ar_NoBSA
1	2	K22E_HUMAN	Keratin, type II cytoskeletal 2 epidermal OS=Homo sapiens GN=KRT2 PE=1 SV=2	6590	65623	244	244	21	21	Homo sapiens	9606	85229	1	0	0	738.399	1474.78	2	1474.78	0.0053	0	72.73	7.5e-07	R	FLEQQNQVLQTK	W					Ar_BSA
1	2	K22E_HUMAN	Keratin, type II cytoskeletal 2 epidermal OS=Homo sapiens GN=KRT2 PE=1 SV=2	6590	65623	244	244	21	21	Homo sapiens	9606	85230	1	0	0	738.399	1474.78	2	1474.78	0.0053	0	77.3	2.7e-07	R	FLEQQNQVLQTK	W					N2_BSA
1	2	K22E_HUMAN	Keratin, type II cytoskeletal 2 epidermal OS=Homo sapiens GN=KRT2 PE=1 SV=2	6590	65623	244	244	21	21	Homo sapiens	9606	85231	1	0	0	738.4	1474.79	2	1474.78	0.0078	0	81.07	5.1e-08	R	FLEQQNQVLQTK	W					Un_NoBSA
1	2	K22E_HUMAN	Keratin, type II cytoskeletal 2 epidermal OS=Homo sapiens GN=KRT2 PE=1 SV=2	6590	65623	244	244	21	21	Homo sapiens	9606	85232	1	0	0	738.401	1474.79	2	1474.78	0.0099	0	72.51	3.7e-07	R	FLEQQNQVLQTK	W					Ar_BSA
1	2	K22E_HUMAN	Keratin, type II cytoskeletal 2 epidermal OS=Homo sapiens GN=KRT2 PE=1 SV=2	6590	65623	244	244	21	21	Homo sapiens	9606	85233	1	0	0	738.402	1474.79	2	1474.78	0.0104	0	65.9	8.3e-06	R	FLEQQNQVLQTK	W					BSA
1	2	K22E_HUMAN	Keratin, type II cytoskeletal 2 epidermal OS=Homo sapiens GN=KRT2 PE=1 SV=2	6590	65623	244	244	21	21	Homo sapiens	9606	85234	1	0	0	738.402	1474.79	2	1474.78	0.011	0	76.62	4.3e-07	R	FLEQQNQVLQTK	W					Nh3_BSA
1	2	K22E_HUMAN	Keratin, type II cytoskeletal 2 epidermal OS=Homo sapiens GN=KRT2 PE=1 SV=2	6590	65623	244	244	21	21	Homo sapiens	9606	85303	1	0	0	738.884	1475.75	2	1475.76	-0.0085	0	40.08	0.00017	R	FLEQQNQVLQTK	W	Deamidated (NQ)	0.000010000000.0			Nh3_BSA
1	2	K22E_HUMAN	Keratin, type II cytoskeletal 2 epidermal OS=Homo sapiens GN=KRT2 PE=1 SV=2	6590	65623	244	244	21	21	Homo sapiens	9606	85304	1	0	0	738.884	1475.75	2	1475.76	-0.0077	0	52.34	5.3e-05	R	FLEQQNQVLQTK	W	Deamidated (NQ)	0.000100000000.0			Ar_NoBSA
1	2	K22E_HUMAN	Keratin, type II cytoskeletal 2 epidermal OS=Homo sapiens GN=KRT2 PE=1 SV=2	6590	65623	244	244	21	21	Homo sapiens	9606	85307	1	0	0	738.885	1475.75	2	1475.76	-0.0071	0	53.38	4.1e-05	R	FLEQQNQVLQTK	W	Deamidated (NQ)	0.000100000000.0			Nh3_NoBSA
1	2	K22E_HUMAN	Keratin, type II cytoskeletal 2 epidermal OS=Homo sapiens GN=KRT2 PE=1 SV=2	6590	65623	244	244	21	21	Homo sapiens	9606	85308	1	0	0	738.886	1475.76	2	1475.76	-0.0045	0	71.37	3.4e-06	R	FLEQQNQVLQTK	W	Deamidated (NQ)	0.000000100000.0			Nh3_BSA
1	2	K22E_HUMAN	Keratin, type II cytoskeletal 2 epidermal OS=Homo sapiens GN=KRT2 PE=1 SV=2	6590	65623	244	244	21	21	Homo sapiens	9606	123782	1	0	0	738.887	1475.76	2	1475.76	-0.0034	0	33.41	0.0016	R	FLEQQNQVLQTK	W	Deamidated (NQ)	0.000000000100.0			N2_NoBSA
1	2	K22E_HUMAN	Keratin, type II cytoskeletal 2 epidermal OS=Homo sapiens GN=KRT2 PE=1 SV=2	6590	65623	244	244	21	21	Homo sapiens	9606	85310	1	0	0	738.887	1475.76	2	1475.76	-0.0027	0	62.68	1.6e-05	R	FLEQQNQVLQTK	W	Deamidated (NQ)	0.000010000000.0			Ar_BSA
1	2	K22E_HUMAN	Keratin, type II cytoskeletal 2 epidermal OS=Homo sapiens GN=KRT2 PE=1 SV=2	6590	65623	244	244	21	21	Homo sapiens	9606	85311	1	0	0	738.887	1475.76	2	1475.76	-0.0021	0	50.19	0.00038	R	FLEQQNQVLQTK	W	Deamidated (NQ)	0.000010000000.0			BSA
1	2	K22E_HUMAN	Keratin, type II cytoskeletal 2 epidermal OS=Homo sapiens GN=KRT2 PE=1 SV=2	6590	65623	244	244	21	21	Homo sapiens	9606	85312	1	0	0	738.888	1475.76	2	1475.76	-0.0016	0	67.75	6.9e-06	R	FLEQQNQVLQTK	W	Deamidated (NQ)	0.000100000000.0			Un_NoBSA
1	2	K22E_HUMAN	Keratin, type II cytoskeletal 2 epidermal OS=Homo sapiens GN=KRT2 PE=1 SV=2	6590	65623	244	244	21	21	Homo sapiens	9606	85315	1	0	0	738.888	1475.76	2	1475.76	-0.0008	0	36.09	0.0014	R	FLEQQNQVLQTK	W	Deamidated (NQ)	0.000010000000.0			BSA
1	2	K22E_HUMAN	Keratin, type II cytoskeletal 2 epidermal OS=Homo sapiens GN=KRT2 PE=1 SV=2	6590	65623	244	244	21	21	Homo sapiens	9606	123708	1	0	0	738.889	1475.76	2	1475.76	0.0005	0	50.7	0.00025	R	FLEQQNQVLQTK	W	Deamidated (NQ)	0.000100000000.0			Un_NoBSA
1	2	K22E_HUMAN	Keratin, type II cytoskeletal 2 epidermal OS=Homo sapiens GN=KRT2 PE=1 SV=2	6590	65623	244	244	21	21	Homo sapiens	9606	123705	1	0	0	738.889	1475.76	2	1475.76	0.0014	0	44.96	0.00017	R	FLEQQNQVLQTK	W	Deamidated (NQ)	0.000000000100.0			N2_NoBSA
1	2	K22E_HUMAN	Keratin, type II cytoskeletal 2 epidermal OS=Homo sapiens GN=KRT2 PE=1 SV=2	6590	65623	244	244	21	21	Homo sapiens	9606	85316	1	0	0	738.889	1475.76	2	1475.76	0.0015	0	56.63	4.7e-05	R	FLEQQNQVLQTK	W	Deamidated (NQ)	0.000010000000.0			BSA
1	2	K22E_HUMAN	Keratin, type II cytoskeletal 2 epidermal OS=Homo sapiens GN=KRT2 PE=1 SV=2	6590	65623	244	244	21	21	Homo sapiens	9606	85317	1	0	0	738.889	1475.76	2	1475.76	0.0019	0	47.29	0.00012	R	FLEQQNQVLQTK	W	Deamidated (NQ)	0.000100000000.0			N2_NoBSA
1	2	K22E_HUMAN	Keratin, type II cytoskeletal 2 epidermal OS=Homo sapiens GN=KRT2 PE=1 SV=2	6590	65623	244	244	21	21	Homo sapiens	9606	85318	1	0	0	738.894	1475.77	2	1475.76	0.0105	0	28.12	0.0026	R	FLEQQNQVLQTK	W	Deamidated (NQ)	0.000010000000.0			N2_NoBSA
1	2	K22E_HUMAN	Keratin, type II cytoskeletal 2 epidermal OS=Homo sapiens GN=KRT2 PE=1 SV=2	6590	65623	244	244	21	21	Homo sapiens	9606	123773	1	0	0	738.894	1475.77	2	1475.76	0.011	0	38.7	0.0031	R	FLEQQNQVLQTK	W	Deamidated (NQ)	0.000010000000.0			Nh3_BSA
1	2	K22E_HUMAN	Keratin, type II cytoskeletal 2 epidermal OS=Homo sapiens GN=KRT2 PE=1 SV=2	6590	65623	244	244	21	21	Homo sapiens	9606	85320	1	0	0	738.895	1475.78	2	1475.76	0.0146	0	37.04	0.00063	R	FLEQQNQVLQTK	W	Deamidated (NQ)	0.000010000000.0			Un_BSA
1	2	K22E_HUMAN	Keratin, type II cytoskeletal 2 epidermal OS=Homo sapiens GN=KRT2 PE=1 SV=2	6590	65623	244	244	21	21	Homo sapiens	9606	89933	1	0	1	769.399	1536.78	2	1536.8	-0.0134	1	33.88	0.004	R	LLRDYQELMNVK	L	Oxidation (M)	0.000000002000.0			Nh3_NoBSA
1	2	K22E_HUMAN	Keratin, type II cytoskeletal 2 epidermal OS=Homo sapiens GN=KRT2 PE=1 SV=2	6590	65623	244	244	21	21	Homo sapiens	9606	89953	1	0	1	769.403	1536.79	2	1536.8	-0.0055	1	28.88	0.002	R	LLRDYQELMNVK	L	Oxidation (M)	0.000000002000.0			Un_NoBSA
1	2	K22E_HUMAN	Keratin, type II cytoskeletal 2 epidermal OS=Homo sapiens GN=KRT2 PE=1 SV=2	6590	65623	244	244	21	21	Homo sapiens	9606	89958	1	0	1	769.404	1536.79	2	1536.8	-0.0044	1	42.51	0.00023	R	LLRDYQELMNVK	L	Oxidation (M)	0.000000002000.0			Nh3_BSA
1	2	K22E_HUMAN	Keratin, type II cytoskeletal 2 epidermal OS=Homo sapiens GN=KRT2 PE=1 SV=2	6590	65623	244	244	21	21	Homo sapiens	9606	89989	1	0	1	769.407	1536.8	2	1536.8	0.0032	1	36.08	0.001	R	LLRDYQELMNVK	L	Oxidation (M)	0.000000002000.0			Ar_BSA
1	2	K22E_HUMAN	Keratin, type II cytoskeletal 2 epidermal OS=Homo sapiens GN=KRT2 PE=1 SV=2	6590	65623	244	244	21	21	Homo sapiens	9606	97298	1	0	1	807.423	1612.83	2	1612.84	-0.0104	1	38.29	0.00026	R	NKLNDLEEALQQAK	E					Nh3_NoBSA
1	2	K22E_HUMAN	Keratin, type II cytoskeletal 2 epidermal OS=Homo sapiens GN=KRT2 PE=1 SV=2	6590	65623	244	244	21	21	Homo sapiens	9606	97299	1	0	1	807.424	1612.83	2	1612.84	-0.0087	1	27.57	0.0099	R	NKLNDLEEALQQAK	E					BSA
1	2	K22E_HUMAN	Keratin, type II cytoskeletal 2 epidermal OS=Homo sapiens GN=KRT2 PE=1 SV=2	6590	65623	244	244	21	21	Homo sapiens	9606	97302	1	0	1	807.429	1612.84	2	1612.84	0.0014	1	62.95	2.6e-06	R	NKLNDLEEALQQAK	E					Nh3_BSA
1	2	K22E_HUMAN	Keratin, type II cytoskeletal 2 epidermal OS=Homo sapiens GN=KRT2 PE=1 SV=2	6590	65623	244	244	21	21	Homo sapiens	9606	114899	1	0	1	652.675	1955	3	1955	0.0083	1	31.93	0.0014	K	LNDLEEALQQAKEDLAR	L					Ar_BSA
1	2	K22E_HUMAN	Keratin, type II cytoskeletal 2 epidermal OS=Homo sapiens GN=KRT2 PE=1 SV=2	6590	65623	244	244	21	21	Homo sapiens	9606	114907	1	0	1	652.678	1955.01	3	1955	0.017	1	32.21	0.0011	K	LNDLEEALQQAKEDLAR	L					Nh3_BSA
1	2	K22E_HUMAN	Keratin, type II cytoskeletal 2 epidermal OS=Homo sapiens GN=KRT2 PE=1 SV=2	6590	65623	244	244	21	21	Homo sapiens	9606	115377	1	0	1	655.67	1963.99	3	1963.97	0.0174	1	62.21	1.5e-06	K	NVQDAIADAEQRGEHALK	D					Nh3_BSA
1	2	K22E_HUMAN	Keratin, type II cytoskeletal 2 epidermal OS=Homo sapiens GN=KRT2 PE=1 SV=2	6590	65623	244	244	21	21	Homo sapiens	9606	124952	1	0	1	752.682	2255.02	3	2255.04	-0.0133	1	29.28	0.0018	R	TSQNSELNNMQDLVEDYKK	K					BSA
1	2	K22E_HUMAN	Keratin, type II cytoskeletal 2 epidermal OS=Homo sapiens GN=KRT2 PE=1 SV=2	6590	65623	244	244	21	21	Homo sapiens	9606	125342	1	0	1	758.016	2271.03	3	2271.03	-0.0057	1	39.01	0.00022	R	TSQNSELNNMQDLVEDYKK	K	Oxidation (M)	0.0000000002000000000.0			N2_NoBSA
1	2	K22E_HUMAN	Keratin, type II cytoskeletal 2 epidermal OS=Homo sapiens GN=KRT2 PE=1 SV=2	6590	65623	244	244	21	21	Homo sapiens	9606	125343	1	0	1	758.017	2271.03	3	2271.03	-0.0037	1	39.38	0.0002	R	TSQNSELNNMQDLVEDYKK	K	Oxidation (M)	0.0000000002000000000.0			Un_BSA
1	2	K22E_HUMAN	Keratin, type II cytoskeletal 2 epidermal OS=Homo sapiens GN=KRT2 PE=1 SV=2	6590	65623	244	244	21	21	Homo sapiens	9606	125344	1	0	1	758.018	2271.03	3	2271.03	-0.0006	1	40.5	0.00016	R	TSQNSELNNMQDLVEDYKK	K	Oxidation (M)	0.0000000002000000000.0			Ar_NoBSA
1	2	K22E_HUMAN	Keratin, type II cytoskeletal 2 epidermal OS=Homo sapiens GN=KRT2 PE=1 SV=2	6590	65623	244	244	21	21	Homo sapiens	9606	125345	1	0	1	758.019	2271.03	3	2271.03	0.0012	1	59.24	2.8e-06	R	TSQNSELNNMQDLVEDYKK	K	Oxidation (M)	0.0000000002000000000.0			Ar_BSA
1	2	K22E_HUMAN	Keratin, type II cytoskeletal 2 epidermal OS=Homo sapiens GN=KRT2 PE=1 SV=2	6590	65623	244	244	21	21	Homo sapiens	9606	125346	1	0	1	758.019	2271.03	3	2271.03	0.0022	1	42.1	0.00011	R	TSQNSELNNMQDLVEDYKK	K	Oxidation (M)	0.0000000002000000000.0			N2_NoBSA
1	2	K22E_HUMAN	Keratin, type II cytoskeletal 2 epidermal OS=Homo sapiens GN=KRT2 PE=1 SV=2	6590	65623	244	244	21	21	Homo sapiens	9606	125347	1	0	1	758.019	2271.04	3	2271.03	0.0035	1	43.73	0.00024	R	TSQNSELNNMQDLVEDYKK	K	Oxidation (M)	0.0000000002000000000.0			N2_NoBSA
1	2	K22E_HUMAN	Keratin, type II cytoskeletal 2 epidermal OS=Homo sapiens GN=KRT2 PE=1 SV=2	6590	65623	244	244	21	21	Homo sapiens	9606	125348	1	0	1	758.02	2271.04	3	2271.03	0.0049	1	50.03	2.4e-05	R	TSQNSELNNMQDLVEDYKK	K	Oxidation (M)	0.0000000002000000000.0			Nh3_NoBSA
1	2	K22E_HUMAN	Keratin, type II cytoskeletal 2 epidermal OS=Homo sapiens GN=KRT2 PE=1 SV=2	6590	65623	244	244	21	21	Homo sapiens	9606	125349	1	0	1	758.02	2271.04	3	2271.03	0.0051	1	52.72	1.1e-05	R	TSQNSELNNMQDLVEDYKK	K	Oxidation (M)	0.0000000002000000000.0			Un_NoBSA
1	2	K22E_HUMAN	Keratin, type II cytoskeletal 2 epidermal OS=Homo sapiens GN=KRT2 PE=1 SV=2	6590	65623	244	244	21	21	Homo sapiens	9606	125350	1	0	1	758.02	2271.04	3	2271.03	0.0053	1	27.25	0.0028	R	TSQNSELNNMQDLVEDYKK	K	Oxidation (M)	0.0000000002000000000.0			N2_BSA
1	2	K22E_HUMAN	Keratin, type II cytoskeletal 2 epidermal OS=Homo sapiens GN=KRT2 PE=1 SV=2	6590	65623	244	244	21	21	Homo sapiens	9606	125351	1	0	1	758.02	2271.04	3	2271.03	0.0062	1	55.08	6.8e-06	R	TSQNSELNNMQDLVEDYKK	K	Oxidation (M)	0.0000000002000000000.0			BSA
1	2	K22E_HUMAN	Keratin, type II cytoskeletal 2 epidermal OS=Homo sapiens GN=KRT2 PE=1 SV=2	6590	65623	244	244	21	21	Homo sapiens	9606	125352	1	0	1	758.02	2271.04	3	2271.03	0.0063	1	54.14	8.4e-06	R	TSQNSELNNMQDLVEDYKK	K	Oxidation (M)	0.0000000002000000000.0			Ar_BSA
1	2	K22E_HUMAN	Keratin, type II cytoskeletal 2 epidermal OS=Homo sapiens GN=KRT2 PE=1 SV=2	6590	65623	244	244	21	21	Homo sapiens	9606	125353	1	0	1	758.02	2271.04	3	2271.03	0.0072	1	51.78	1.4e-05	R	TSQNSELNNMQDLVEDYKK	K	Oxidation (M)	0.0000000002000000000.0			BSA
1	2	K22E_HUMAN	Keratin, type II cytoskeletal 2 epidermal OS=Homo sapiens GN=KRT2 PE=1 SV=2	6590	65623	244	244	21	21	Homo sapiens	9606	125354	1	0	1	758.021	2271.04	3	2271.03	0.0088	1	35.61	0.00046	R	TSQNSELNNMQDLVEDYKK	K	Oxidation (M)	0.0000000002000000000.0			Ar_NoBSA
1	2	K22E_HUMAN	Keratin, type II cytoskeletal 2 epidermal OS=Homo sapiens GN=KRT2 PE=1 SV=2	6590	65623	244	244	21	21	Homo sapiens	9606	125355	1	0	1	758.021	2271.04	3	2271.03	0.0091	1	46.39	4.5e-05	R	TSQNSELNNMQDLVEDYKK	K	Oxidation (M)	0.0000000002000000000.0			NoBSA
1	2	K22E_HUMAN	Keratin, type II cytoskeletal 2 epidermal OS=Homo sapiens GN=KRT2 PE=1 SV=2	6590	65623	244	244	21	21	Homo sapiens	9606	125356	1	0	1	758.021	2271.04	3	2271.03	0.0091	1	42.38	0.00011	R	TSQNSELNNMQDLVEDYKK	K	Oxidation (M)	0.0000000002000000000.0			Nh3_NoBSA
1	2	K22E_HUMAN	Keratin, type II cytoskeletal 2 epidermal OS=Homo sapiens GN=KRT2 PE=1 SV=2	6590	65623	244	244	21	21	Homo sapiens	9606	125357	1	0	1	758.021	2271.04	3	2271.03	0.0095	1	59.15	2.8e-06	R	TSQNSELNNMQDLVEDYKK	K	Oxidation (M)	0.0000000002000000000.0			Un_NoBSA
1	2	K22E_HUMAN	Keratin, type II cytoskeletal 2 epidermal OS=Homo sapiens GN=KRT2 PE=1 SV=2	6590	65623	244	244	21	21	Homo sapiens	9606	125358	1	0	1	758.021	2271.04	3	2271.03	0.0095	1	33.55	0.00094	R	TSQNSELNNMQDLVEDYKK	K	Oxidation (M)	0.0000000002000000000.0			Ar_NoBSA
1	2	K22E_HUMAN	Keratin, type II cytoskeletal 2 epidermal OS=Homo sapiens GN=KRT2 PE=1 SV=2	6590	65623	244	244	21	21	Homo sapiens	9606	125359	1	0	1	758.022	2271.05	3	2271.03	0.0128	1	48.93	2.6e-05	R	TSQNSELNNMQDLVEDYKK	K	Oxidation (M)	0.0000000002000000000.0			Un_BSA
1	2	K22E_HUMAN	Keratin, type II cytoskeletal 2 epidermal OS=Homo sapiens GN=KRT2 PE=1 SV=2	6590	65623	244	244	21	21	Homo sapiens	9606	125360	1	0	1	758.022	2271.05	3	2271.03	0.0128	1	39.15	0.00036	R	TSQNSELNNMQDLVEDYKK	K	Oxidation (M)	0.0000000002000000000.0			Nh3_BSA
1	2	K22E_HUMAN	Keratin, type II cytoskeletal 2 epidermal OS=Homo sapiens GN=KRT2 PE=1 SV=2	6590	65623	244	244	21	21	Homo sapiens	9606	125361	1	0	1	758.023	2271.05	3	2271.03	0.0132	1	53.22	1e-05	R	TSQNSELNNMQDLVEDYKK	K	Oxidation (M)	0.0000000002000000000.0			Ar_BSA
1	2	K22E_HUMAN	Keratin, type II cytoskeletal 2 epidermal OS=Homo sapiens GN=KRT2 PE=1 SV=2	6590	65623	244	244	21	21	Homo sapiens	9606	125362	1	0	1	758.023	2271.05	3	2271.03	0.0136	1	39.83	0.00018	R	TSQNSELNNMQDLVEDYKK	K	Oxidation (M)	0.0000000002000000000.0			Nh3_NoBSA
1	2	K22E_HUMAN	Keratin, type II cytoskeletal 2 epidermal OS=Homo sapiens GN=KRT2 PE=1 SV=2	6590	65623	244	244	21	21	Homo sapiens	9606	125363	1	0	1	758.024	2271.05	3	2271.03	0.0161	1	45.46	5.5e-05	R	TSQNSELNNMQDLVEDYKK	K	Oxidation (M)	0.0000000002000000000.0			N2_BSA
1	2	K22E_HUMAN	Keratin, type II cytoskeletal 2 epidermal OS=Homo sapiens GN=KRT2 PE=1 SV=2	6590	65623	244	244	21	21	Homo sapiens	9606	125364	1	0	1	758.024	2271.05	3	2271.03	0.0162	1	39.52	0.00022	R	TSQNSELNNMQDLVEDYKK	K	Oxidation (M)	0.0000000002000000000.0			BSA
1	2	K22E_HUMAN	Keratin, type II cytoskeletal 2 epidermal OS=Homo sapiens GN=KRT2 PE=1 SV=2	6590	65623	244	244	21	21	Homo sapiens	9606	125365	1	0	1	758.024	2271.05	3	2271.03	0.017	1	54.25	8.2e-06	R	TSQNSELNNMQDLVEDYKK	K	Oxidation (M)	0.0000000002000000000.0			NoBSA
1	2	K22E_HUMAN	Keratin, type II cytoskeletal 2 epidermal OS=Homo sapiens GN=KRT2 PE=1 SV=2	6590	65623	244	244	21	21	Homo sapiens	9606	125331	1	0	1	758.35	2272.03	3	2272.02	0.0118	1	50.72	1.8e-05	R	TSQNSELNNMQDLVEDYKK	K	Deamidated (NQ); Oxidation (M)	0.0000000012000000000.0			N2_BSA
1	2	K22E_HUMAN	Keratin, type II cytoskeletal 2 epidermal OS=Homo sapiens GN=KRT2 PE=1 SV=2	6590	65623	244	244	21	21	Homo sapiens	9606	142667	1	0	1	758.351	2272.03	3	2272.02	0.0144	1	58.59	3.2e-06	R	TSQNSELNNMQDLVEDYKK	K	Deamidated (NQ); Oxidation (M)	0.0000000012000000000.0			Nh3_BSA
1	2	K22E_HUMAN	Keratin, type II cytoskeletal 2 epidermal OS=Homo sapiens GN=KRT2 PE=1 SV=2	6590	65623	244	244	21	21	Homo sapiens	9606	125383	1	0	1	758.352	2272.03	3	2272.02	0.018	1	51.69	1.4e-05	R	TSQNSELNNMQDLVEDYKK	K	Deamidated (NQ); Oxidation (M)	0.0000000012000000000.0			Un_BSA
1	2	K22E_HUMAN	Keratin, type II cytoskeletal 2 epidermal OS=Homo sapiens GN=KRT2 PE=1 SV=2	6590	65623	244	244	21	21	Homo sapiens	9606	129916	1	0	0	806.754	2417.24	3	2417.24	-0.005	1	39.24	0.00021	R	NLDLDSIIAEVKAQYEEIAQR	S					Ar_BSA
1	2	K22E_HUMAN	Keratin, type II cytoskeletal 2 epidermal OS=Homo sapiens GN=KRT2 PE=1 SV=2	6590	65623	244	244	21	21	Homo sapiens	9606	129917	1	0	0	806.757	2417.25	3	2417.24	0.0058	1	33.31	0.00075	R	NLDLDSIIAEVKAQYEEIAQR	S					Un_NoBSA
1	2	K22E_HUMAN	Keratin, type II cytoskeletal 2 epidermal OS=Homo sapiens GN=KRT2 PE=1 SV=2	6590	65623	244	244	21	21	Homo sapiens	9606	137356	1	0	1	1022.16	3063.45	3	3063.48	-0.0294	0	36.02	0.0022	K	VLYDAEISQIHQSVTDTNVILSMDNSR	N	Oxidation (M)	0.000000000000000000000020000.0			Nh3_NoBSA
1	2	K22E_HUMAN	Keratin, type II cytoskeletal 2 epidermal OS=Homo sapiens GN=KRT2 PE=1 SV=2	6590	65623	244	244	21	21	Homo sapiens	9606	137357	1	0	1	1022.16	3063.46	3	3063.48	-0.0252	0	38.11	0.00027	K	VLYDAEISQIHQSVTDTNVILSMDNSR	N	Oxidation (M)	0.000000000000000000000020000.0			BSA
1	2	K22E_HUMAN	Keratin, type II cytoskeletal 2 epidermal OS=Homo sapiens GN=KRT2 PE=1 SV=2	6590	65623	244	244	21	21	Homo sapiens	9606	137358	1	0	1	1022.16	3063.46	3	3063.48	-0.0234	0	50.01	2.3e-05	K	VLYDAEISQIHQSVTDTNVILSMDNSR	N	Oxidation (M)	0.000000000000000000000020000.0			Un_NoBSA
1	2	K22E_HUMAN	Keratin, type II cytoskeletal 2 epidermal OS=Homo sapiens GN=KRT2 PE=1 SV=2	6590	65623	244	244	21	21	Homo sapiens	9606	137359	1	0	1	1022.16	3063.46	3	3063.48	-0.0228	0	43.89	0.00013	K	VLYDAEISQIHQSVTDTNVILSMDNSR	N	Oxidation (M)	0.000000000000000000000020000.0			N2_BSA
1	2	K22E_HUMAN	Keratin, type II cytoskeletal 2 epidermal OS=Homo sapiens GN=KRT2 PE=1 SV=2	6590	65623	244	244	21	21	Homo sapiens	9606	137360	1	0	1	1022.16	3063.46	3	3063.48	-0.0225	0	55.67	1.2e-05	K	VLYDAEISQIHQSVTDTNVILSMDNSR	N	Oxidation (M)	0.000000000000000000000020000.0			Un_BSA
1	2	K22E_HUMAN	Keratin, type II cytoskeletal 2 epidermal OS=Homo sapiens GN=KRT2 PE=1 SV=2	6590	65623	244	244	21	21	Homo sapiens	9606	137373	1	0	1	1022.49	3064.44	3	3064.47	-0.0297	0	48.9	2.8e-05	K	VLYDAEISQIHQSVTDTNVILSMDNSR	N	Deamidated (NQ); Oxidation (M)	0.000000000001000000000020000.0			Ar_NoBSA
1	3	K2C6B_HUMAN	Keratin, type II cytoskeletal 6B OS=Homo sapiens GN=KRT6B PE=1 SV=5	1360	60260	54	54	9	9	Homo sapiens	9606	49753	1	0	0	590.303	1178.59	2	1178.59	-0.0024	0	33.42	0.0074	K	YEELQITAGR	H					Un_NoBSA
1	3	K2C6B_HUMAN	Keratin, type II cytoskeletal 6B OS=Homo sapiens GN=KRT6B PE=1 SV=5	1360	60260	54	54	9	9	Homo sapiens	9606	49761	1	0	0	590.306	1178.6	2	1178.59	0.0051	0	34.35	0.0063	K	YEELQITAGR	H					Ar_NoBSA
1	3	K2C6B_HUMAN	Keratin, type II cytoskeletal 6B OS=Homo sapiens GN=KRT6B PE=1 SV=5	1360	60260	54	54	9	9	Homo sapiens	9606	49763	1	0	0	590.307	1178.6	2	1178.59	0.006	0	65.29	1.2e-05	K	YEELQITAGR	H					Un_NoBSA
1	3	K2C6B_HUMAN	Keratin, type II cytoskeletal 6B OS=Homo sapiens GN=KRT6B PE=1 SV=5	1360	60260	54	54	9	9	Homo sapiens	9606	49766	1	0	0	590.308	1178.6	2	1178.59	0.008	0	57.66	7.7e-05	K	YEELQITAGR	H					N2_NoBSA
1	3	K2C6B_HUMAN	Keratin, type II cytoskeletal 6B OS=Homo sapiens GN=KRT6B PE=1 SV=5	1360	60260	54	54	9	9	Homo sapiens	9606	49767	1	0	0	590.308	1178.6	2	1178.59	0.0081	0	51.62	0.00031	K	YEELQITAGR	H					BSA
1	3	K2C6B_HUMAN	Keratin, type II cytoskeletal 6B OS=Homo sapiens GN=KRT6B PE=1 SV=5	1360	60260	54	54	9	9	Homo sapiens	9606	49771	1	0	0	590.309	1178.6	2	1178.59	0.0108	0	69.51	5.2e-06	K	YEELQITAGR	H					NoBSA
1	3	K2C6B_HUMAN	Keratin, type II cytoskeletal 6B OS=Homo sapiens GN=KRT6B PE=1 SV=5	1360	60260	54	54	9	9	Homo sapiens	9606	52979	1	0	0	602.323	1202.63	2	1202.63	0.0015	0	29.64	0.0079	K	WTLLQEQGTK	T					NoBSA
1	3	K2C6B_HUMAN	Keratin, type II cytoskeletal 6B OS=Homo sapiens GN=KRT6B PE=1 SV=5	1360	60260	54	54	9	9	Homo sapiens	9606	60687	1	0	0	632.347	1262.68	2	1262.69	-0.0073	0	80.78	2.7e-07	K	LALDVEIATYR	K					Nh3_NoBSA
1	3	K2C6B_HUMAN	Keratin, type II cytoskeletal 6B OS=Homo sapiens GN=KRT6B PE=1 SV=5	1360	60260	54	54	9	9	Homo sapiens	9606	60691	1	0	0	632.352	1262.69	2	1262.69	0.003	0	45.89	0.00072	K	LALDVEIATYR	K					NoBSA
1	3	K2C6B_HUMAN	Keratin, type II cytoskeletal 6B OS=Homo sapiens GN=KRT6B PE=1 SV=5	1360	60260	54	54	9	9	Homo sapiens	9606	60692	1	0	0	632.353	1262.69	2	1262.69	0.0047	0	73.67	1.2e-06	K	LALDVEIATYR	K					Ar_BSA
1	3	K2C6B_HUMAN	Keratin, type II cytoskeletal 6B OS=Homo sapiens GN=KRT6B PE=1 SV=5	1360	60260	54	54	9	9	Homo sapiens	9606	60696	1	0	0	632.354	1262.69	2	1262.69	0.0063	0	52.8	0.00014	K	LALDVEIATYR	K					Un_NoBSA
1	3	K2C6B_HUMAN	Keratin, type II cytoskeletal 6B OS=Homo sapiens GN=KRT6B PE=1 SV=5	1360	60260	54	54	9	9	Homo sapiens	9606	60697	1	0	0	632.354	1262.69	2	1262.69	0.007	0	47.8	0.00044	K	LALDVEIATYR	K					Ar_BSA
1	3	K2C6B_HUMAN	Keratin, type II cytoskeletal 6B OS=Homo sapiens GN=KRT6B PE=1 SV=5	1360	60260	54	54	9	9	Homo sapiens	9606	131676	1	0	0	632.355	1262.7	2	1262.69	0.0084	0	58.97	3.4e-05	K	LALDVEIATYR	K					Nh3_BSA
1	3	K2C6B_HUMAN	Keratin, type II cytoskeletal 6B OS=Homo sapiens GN=KRT6B PE=1 SV=5	1360	60260	54	54	9	9	Homo sapiens	9606	60699	1	0	0	632.355	1262.7	2	1262.69	0.0085	0	66.37	6.2e-06	K	LALDVEIATYR	K					Nh3_BSA
1	3	K2C6B_HUMAN	Keratin, type II cytoskeletal 6B OS=Homo sapiens GN=KRT6B PE=1 SV=5	1360	60260	54	54	9	9	Homo sapiens	9606	60700	1	0	0	632.355	1262.7	2	1262.69	0.0085	0	44.56	0.00078	K	LALDVEIATYR	K					BSA
1	3	K2C6B_HUMAN	Keratin, type II cytoskeletal 6B OS=Homo sapiens GN=KRT6B PE=1 SV=5	1360	60260	54	54	9	9	Homo sapiens	9606	60459	1	0	0	632.355	1262.7	2	1262.69	0.0091	0	55.47	7.5e-05	K	LALDVEIATYR	K					Ar_NoBSA
1	3	K2C6B_HUMAN	Keratin, type II cytoskeletal 6B OS=Homo sapiens GN=KRT6B PE=1 SV=5	1360	60260	54	54	9	9	Homo sapiens	9606	60702	1	0	0	632.356	1262.7	2	1262.69	0.01	0	74.95	9e-07	K	LALDVEIATYR	K					Ar_NoBSA
1	3	K2C6B_HUMAN	Keratin, type II cytoskeletal 6B OS=Homo sapiens GN=KRT6B PE=1 SV=5	1360	60260	54	54	9	9	Homo sapiens	9606	131678	1	0	0	632.356	1262.7	2	1262.69	0.0101	0	83.1	1.3e-07	K	LALDVEIATYR	K					Un_BSA
1	3	K2C6B_HUMAN	Keratin, type II cytoskeletal 6B OS=Homo sapiens GN=KRT6B PE=1 SV=5	1360	60260	54	54	9	9	Homo sapiens	9606	60703	1	0	0	632.356	1262.7	2	1262.69	0.0106	0	70.12	2.6e-06	K	LALDVEIATYR	K					N2_NoBSA
1	3	K2C6B_HUMAN	Keratin, type II cytoskeletal 6B OS=Homo sapiens GN=KRT6B PE=1 SV=5	1360	60260	54	54	9	9	Homo sapiens	9606	69438	1	0	0	665.367	1328.72	2	1328.72	0.0015	0	55.02	0.0001	R	NLDLDSIIAEVK	A					Un_NoBSA
1	3	K2C6B_HUMAN	Keratin, type II cytoskeletal 6B OS=Homo sapiens GN=KRT6B PE=1 SV=5	1360	60260	54	54	9	9	Homo sapiens	9606	69440	1	0	0	665.369	1328.72	2	1328.72	0.0039	0	60.53	2.9e-05	R	NLDLDSIIAEVK	A					N2_NoBSA
1	3	K2C6B_HUMAN	Keratin, type II cytoskeletal 6B OS=Homo sapiens GN=KRT6B PE=1 SV=5	1360	60260	54	54	9	9	Homo sapiens	9606	69441	1	0	0	665.369	1328.72	2	1328.72	0.0047	0	35.09	0.0016	R	NLDLDSIIAEVK	A					Nh3_BSA
1	3	K2C6B_HUMAN	Keratin, type II cytoskeletal 6B OS=Homo sapiens GN=KRT6B PE=1 SV=5	1360	60260	54	54	9	9	Homo sapiens	9606	69442	1	0	0	665.369	1328.72	2	1328.72	0.0053	0	47.81	9.7e-05	R	NLDLDSIIAEVK	A					Ar_NoBSA
1	3	K2C6B_HUMAN	Keratin, type II cytoskeletal 6B OS=Homo sapiens GN=KRT6B PE=1 SV=5	1360	60260	54	54	9	9	Homo sapiens	9606	69445	1	0	0	665.371	1328.73	2	1328.72	0.0091	0	42.55	0.00023	R	NLDLDSIIAEVK	A					Nh3_BSA
1	3	K2C6B_HUMAN	Keratin, type II cytoskeletal 6B OS=Homo sapiens GN=KRT6B PE=1 SV=5	1360	60260	54	54	9	9	Homo sapiens	9606	69446	1	0	0	665.371	1328.73	2	1328.72	0.0098	0	44.39	0.0002	R	NLDLDSIIAEVK	A					BSA
1	3	K2C6B_HUMAN	Keratin, type II cytoskeletal 6B OS=Homo sapiens GN=KRT6B PE=1 SV=5	1360	60260	54	54	9	9	Homo sapiens	9606	69448	1	0	0	665.372	1328.73	2	1328.72	0.0101	0	54.83	7.5e-05	R	NLDLDSIIAEVK	A					Ar_NoBSA
1	3	K2C6B_HUMAN	Keratin, type II cytoskeletal 6B OS=Homo sapiens GN=KRT6B PE=1 SV=5	1360	60260	54	54	9	9	Homo sapiens	9606	69449	1	0	0	665.372	1328.73	2	1328.72	0.0103	0	47.59	0.0002	R	NLDLDSIIAEVK	A					NoBSA
1	3	K2C6B_HUMAN	Keratin, type II cytoskeletal 6B OS=Homo sapiens GN=KRT6B PE=1 SV=5	1360	60260	54	54	9	9	Homo sapiens	9606	69450	1	0	0	665.372	1328.73	2	1328.72	0.0113	0	55.66	9e-05	R	NLDLDSIIAEVK	A					Ar_BSA
1	3	K2C6B_HUMAN	Keratin, type II cytoskeletal 6B OS=Homo sapiens GN=KRT6B PE=1 SV=5	1360	60260	54	54	9	9	Homo sapiens	9606	69451	1	0	0	665.372	1328.73	2	1328.72	0.0116	0	41.94	0.00045	R	NLDLDSIIAEVK	A					Un_NoBSA
1	3	K2C6B_HUMAN	Keratin, type II cytoskeletal 6B OS=Homo sapiens GN=KRT6B PE=1 SV=5	1360	60260	54	54	9	9	Homo sapiens	9606	69452	1	0	0	665.373	1328.73	2	1328.72	0.0128	0	57.15	6.3e-05	R	NLDLDSIIAEVK	A					BSA
1	3	K2C6B_HUMAN	Keratin, type II cytoskeletal 6B OS=Homo sapiens GN=KRT6B PE=1 SV=5	1360	60260	54	54	9	9	Homo sapiens	9606	69528	1	0	0	665.864	1329.71	2	1329.7	0.0097	0	60.92	3.2e-05	R	NLDLDSIIAEVK	A	Deamidated (NQ)	0.100000000000.0			Nh3_BSA
1	3	K2C6B_HUMAN	Keratin, type II cytoskeletal 6B OS=Homo sapiens GN=KRT6B PE=1 SV=5	1360	60260	54	54	9	9	Homo sapiens	9606	69529	1	0	0	665.864	1329.71	2	1329.7	0.0115	0	50.91	0.00032	R	NLDLDSIIAEVK	A	Deamidated (NQ)	0.100000000000.0			Ar_BSA
1	3	K2C6B_HUMAN	Keratin, type II cytoskeletal 6B OS=Homo sapiens GN=KRT6B PE=1 SV=5	1360	60260	54	54	9	9	Homo sapiens	9606	71973	1	0	0	675.872	1349.73	2	1349.72	0.0112	1	46.47	4.4e-05	R	TAAENEFVTLKK	D					Nh3_NoBSA
1	3	K2C6B_HUMAN	Keratin, type II cytoskeletal 6B OS=Homo sapiens GN=KRT6B PE=1 SV=5	1360	60260	54	54	9	9	Homo sapiens	9606	76778	1	0	0	696.395	1390.78	2	1390.78	-0.0068	1	42.22	0.00025	K	LALDVEIATYRK	L					Nh3_NoBSA
1	3	K2C6B_HUMAN	Keratin, type II cytoskeletal 6B OS=Homo sapiens GN=KRT6B PE=1 SV=5	1360	60260	54	54	9	9	Homo sapiens	9606	76788	1	0	0	696.405	1390.79	2	1390.78	0.0127	1	24.77	0.0048	K	LALDVEIATYRK	L					N2_NoBSA
1	3	K2C6B_HUMAN	Keratin, type II cytoskeletal 6B OS=Homo sapiens GN=KRT6B PE=1 SV=5	1360	60260	54	54	9	9	Homo sapiens	9606	78404	1	0	0	704.355	1406.69	2	1406.7	-0.0093	0	41.87	0.00027	K	ADTLTDEINFLR	A					N2_BSA
1	3	K2C6B_HUMAN	Keratin, type II cytoskeletal 6B OS=Homo sapiens GN=KRT6B PE=1 SV=5	1360	60260	54	54	9	9	Homo sapiens	9606	78407	1	0	0	704.358	1406.7	2	1406.7	-0.0028	0	88.67	6.9e-08	K	ADTLTDEINFLR	A					Ar_BSA
1	3	K2C6B_HUMAN	Keratin, type II cytoskeletal 6B OS=Homo sapiens GN=KRT6B PE=1 SV=5	1360	60260	54	54	9	9	Homo sapiens	9606	78410	1	0	0	704.362	1406.71	2	1406.7	0.0052	0	59	1.5e-05	K	ADTLTDEINFLR	A					Nh3_BSA
1	3	K2C6B_HUMAN	Keratin, type II cytoskeletal 6B OS=Homo sapiens GN=KRT6B PE=1 SV=5	1360	60260	54	54	9	9	Homo sapiens	9606	78411	1	0	0	704.362	1406.71	2	1406.7	0.0056	0	69.44	1.2e-06	K	ADTLTDEINFLR	A					BSA
1	3	K2C6B_HUMAN	Keratin, type II cytoskeletal 6B OS=Homo sapiens GN=KRT6B PE=1 SV=5	1360	60260	54	54	9	9	Homo sapiens	9606	78412	1	0	0	704.363	1406.71	2	1406.7	0.0069	0	54.83	3.5e-05	K	ADTLTDEINFLR	A					Ar_NoBSA
1	3	K2C6B_HUMAN	Keratin, type II cytoskeletal 6B OS=Homo sapiens GN=KRT6B PE=1 SV=5	1360	60260	54	54	9	9	Homo sapiens	9606	78413	1	0	0	704.363	1406.71	2	1406.7	0.007	0	53.76	2e-05	K	ADTLTDEINFLR	A					Un_NoBSA
1	3	K2C6B_HUMAN	Keratin, type II cytoskeletal 6B OS=Homo sapiens GN=KRT6B PE=1 SV=5	1360	60260	54	54	9	9	Homo sapiens	9606	78414	1	0	0	704.363	1406.71	2	1406.7	0.0072	0	45.9	5e-05	K	ADTLTDEINFLR	A					Ar_NoBSA
1	3	K2C6B_HUMAN	Keratin, type II cytoskeletal 6B OS=Homo sapiens GN=KRT6B PE=1 SV=5	1360	60260	54	54	9	9	Homo sapiens	9606	78415	1	0	0	704.363	1406.71	2	1406.7	0.0074	0	66.03	9.2e-06	K	ADTLTDEINFLR	A					Un_BSA
1	3	K2C6B_HUMAN	Keratin, type II cytoskeletal 6B OS=Homo sapiens GN=KRT6B PE=1 SV=5	1360	60260	54	54	9	9	Homo sapiens	9606	78416	1	0	0	704.364	1406.71	2	1406.7	0.0096	0	79.47	1.6e-07	K	ADTLTDEINFLR	A					Un_BSA
1	3	K2C6B_HUMAN	Keratin, type II cytoskeletal 6B OS=Homo sapiens GN=KRT6B PE=1 SV=5	1360	60260	54	54	9	9	Homo sapiens	9606	78417	1	0	0	704.365	1406.72	2	1406.7	0.0111	0	71.67	9.9e-07	K	ADTLTDEINFLR	A					BSA
1	3	K2C6B_HUMAN	Keratin, type II cytoskeletal 6B OS=Homo sapiens GN=KRT6B PE=1 SV=5	1360	60260	54	54	9	9	Homo sapiens	9606	78418	1	0	0	704.365	1406.72	2	1406.7	0.0119	0	66.87	3.8e-06	K	ADTLTDEINFLR	A					Ar_BSA
1	3	K2C6B_HUMAN	Keratin, type II cytoskeletal 6B OS=Homo sapiens GN=KRT6B PE=1 SV=5	1360	60260	54	54	9	9	Homo sapiens	9606	78420	1	0	0	704.366	1406.72	2	1406.7	0.0125	0	94	2e-08	K	ADTLTDEINFLR	A					Nh3_NoBSA
1	3	K2C6B_HUMAN	Keratin, type II cytoskeletal 6B OS=Homo sapiens GN=KRT6B PE=1 SV=5	1360	60260	54	54	9	9	Homo sapiens	9606	78421	1	0	0	704.366	1406.72	2	1406.7	0.0128	0	49.87	0.00011	K	ADTLTDEINFLR	A					Nh3_NoBSA
1	3	K2C6B_HUMAN	Keratin, type II cytoskeletal 6B OS=Homo sapiens GN=KRT6B PE=1 SV=5	1360	60260	54	54	9	9	Homo sapiens	9606	78422	1	0	0	704.366	1406.72	2	1406.7	0.0128	0	74.92	1.1e-06	K	ADTLTDEINFLR	A					NoBSA
1	3	K2C6B_HUMAN	Keratin, type II cytoskeletal 6B OS=Homo sapiens GN=KRT6B PE=1 SV=5	1360	60260	54	54	9	9	Homo sapiens	9606	78423	1	0	0	704.366	1406.72	2	1406.7	0.0131	0	71.36	2.4e-06	K	ADTLTDEINFLR	A					Un_NoBSA
1	3	K2C6B_HUMAN	Keratin, type II cytoskeletal 6B OS=Homo sapiens GN=KRT6B PE=1 SV=5	1360	60260	54	54	9	9	Homo sapiens	9606	78424	1	0	0	704.366	1406.72	2	1406.7	0.0139	0	59.89	3e-05	K	ADTLTDEINFLR	A					Un_BSA
1	3	K2C6B_HUMAN	Keratin, type II cytoskeletal 6B OS=Homo sapiens GN=KRT6B PE=1 SV=5	1360	60260	54	54	9	9	Homo sapiens	9606	81348	1	0	1	718.375	1434.73	2	1434.73	0.0035	0	31.38	0.0011	R	ATGGGLSSVGGGSSTIK	Y					Nh3_NoBSA
1	3	K2C6B_HUMAN	Keratin, type II cytoskeletal 6B OS=Homo sapiens GN=KRT6B PE=1 SV=5	1360	60260	54	54	9	9	Homo sapiens	9606	129916	1	0	0	806.754	2417.24	3	2417.24	-0.005	1	39.24	0.00021	R	NLDLDSIIAEVKAQYEEIAQR	S					Ar_BSA
1	3	K2C6B_HUMAN	Keratin, type II cytoskeletal 6B OS=Homo sapiens GN=KRT6B PE=1 SV=5	1360	60260	54	54	9	9	Homo sapiens	9606	129917	1	0	0	806.757	2417.25	3	2417.24	0.0058	1	33.31	0.00075	R	NLDLDSIIAEVKAQYEEIAQR	S					Un_NoBSA
1	4	K2C6A_HUMAN	Keratin, type II cytoskeletal 6A OS=Homo sapiens GN=KRT6A PE=1 SV=3	1300	60238	51	51	9	9	Homo sapiens	9606	47184	1	0	0	583.301	1164.59	2	1164.58	0.0108	0	46.89	0.00043	K	YEELQVTAGR	H					BSA
1	4	K2C6A_HUMAN	Keratin, type II cytoskeletal 6A OS=Homo sapiens GN=KRT6A PE=1 SV=3	1300	60238	51	51	9	9	Homo sapiens	9606	52979	1	0	0	602.323	1202.63	2	1202.63	0.0015	0	29.64	0.0079	K	WTLLQEQGTK	T					NoBSA
1	4	K2C6A_HUMAN	Keratin, type II cytoskeletal 6A OS=Homo sapiens GN=KRT6A PE=1 SV=3	1300	60238	51	51	9	9	Homo sapiens	9606	60687	1	0	0	632.347	1262.68	2	1262.69	-0.0073	0	80.78	2.7e-07	K	LALDVEIATYR	K					Nh3_NoBSA
1	4	K2C6A_HUMAN	Keratin, type II cytoskeletal 6A OS=Homo sapiens GN=KRT6A PE=1 SV=3	1300	60238	51	51	9	9	Homo sapiens	9606	60691	1	0	0	632.352	1262.69	2	1262.69	0.003	0	45.89	0.00072	K	LALDVEIATYR	K					NoBSA
1	4	K2C6A_HUMAN	Keratin, type II cytoskeletal 6A OS=Homo sapiens GN=KRT6A PE=1 SV=3	1300	60238	51	51	9	9	Homo sapiens	9606	60692	1	0	0	632.353	1262.69	2	1262.69	0.0047	0	73.67	1.2e-06	K	LALDVEIATYR	K					Ar_BSA
1	4	K2C6A_HUMAN	Keratin, type II cytoskeletal 6A OS=Homo sapiens GN=KRT6A PE=1 SV=3	1300	60238	51	51	9	9	Homo sapiens	9606	60696	1	0	0	632.354	1262.69	2	1262.69	0.0063	0	52.8	0.00014	K	LALDVEIATYR	K					Un_NoBSA
1	4	K2C6A_HUMAN	Keratin, type II cytoskeletal 6A OS=Homo sapiens GN=KRT6A PE=1 SV=3	1300	60238	51	51	9	9	Homo sapiens	9606	60697	1	0	0	632.354	1262.69	2	1262.69	0.007	0	47.8	0.00044	K	LALDVEIATYR	K					Ar_BSA
1	4	K2C6A_HUMAN	Keratin, type II cytoskeletal 6A OS=Homo sapiens GN=KRT6A PE=1 SV=3	1300	60238	51	51	9	9	Homo sapiens	9606	131676	1	0	0	632.355	1262.7	2	1262.69	0.0084	0	58.97	3.4e-05	K	LALDVEIATYR	K					Nh3_BSA
1	4	K2C6A_HUMAN	Keratin, type II cytoskeletal 6A OS=Homo sapiens GN=KRT6A PE=1 SV=3	1300	60238	51	51	9	9	Homo sapiens	9606	60699	1	0	0	632.355	1262.7	2	1262.69	0.0085	0	66.37	6.2e-06	K	LALDVEIATYR	K					Nh3_BSA
1	4	K2C6A_HUMAN	Keratin, type II cytoskeletal 6A OS=Homo sapiens GN=KRT6A PE=1 SV=3	1300	60238	51	51	9	9	Homo sapiens	9606	60700	1	0	0	632.355	1262.7	2	1262.69	0.0085	0	44.56	0.00078	K	LALDVEIATYR	K					BSA
1	4	K2C6A_HUMAN	Keratin, type II cytoskeletal 6A OS=Homo sapiens GN=KRT6A PE=1 SV=3	1300	60238	51	51	9	9	Homo sapiens	9606	60459	1	0	0	632.355	1262.7	2	1262.69	0.0091	0	55.47	7.5e-05	K	LALDVEIATYR	K					Ar_NoBSA
1	4	K2C6A_HUMAN	Keratin, type II cytoskeletal 6A OS=Homo sapiens GN=KRT6A PE=1 SV=3	1300	60238	51	51	9	9	Homo sapiens	9606	60702	1	0	0	632.356	1262.7	2	1262.69	0.01	0	74.95	9e-07	K	LALDVEIATYR	K					Ar_NoBSA
1	4	K2C6A_HUMAN	Keratin, type II cytoskeletal 6A OS=Homo sapiens GN=KRT6A PE=1 SV=3	1300	60238	51	51	9	9	Homo sapiens	9606	131678	1	0	0	632.356	1262.7	2	1262.69	0.0101	0	83.1	1.3e-07	K	LALDVEIATYR	K					Un_BSA
1	4	K2C6A_HUMAN	Keratin, type II cytoskeletal 6A OS=Homo sapiens GN=KRT6A PE=1 SV=3	1300	60238	51	51	9	9	Homo sapiens	9606	60703	1	0	0	632.356	1262.7	2	1262.69	0.0106	0	70.12	2.6e-06	K	LALDVEIATYR	K					N2_NoBSA
1	4	K2C6A_HUMAN	Keratin, type II cytoskeletal 6A OS=Homo sapiens GN=KRT6A PE=1 SV=3	1300	60238	51	51	9	9	Homo sapiens	9606	69438	1	0	0	665.367	1328.72	2	1328.72	0.0015	0	55.02	0.0001	R	NLDLDSIIAEVK	A					Un_NoBSA
1	4	K2C6A_HUMAN	Keratin, type II cytoskeletal 6A OS=Homo sapiens GN=KRT6A PE=1 SV=3	1300	60238	51	51	9	9	Homo sapiens	9606	69440	1	0	0	665.369	1328.72	2	1328.72	0.0039	0	60.53	2.9e-05	R	NLDLDSIIAEVK	A					N2_NoBSA
1	4	K2C6A_HUMAN	Keratin, type II cytoskeletal 6A OS=Homo sapiens GN=KRT6A PE=1 SV=3	1300	60238	51	51	9	9	Homo sapiens	9606	69441	1	0	0	665.369	1328.72	2	1328.72	0.0047	0	35.09	0.0016	R	NLDLDSIIAEVK	A					Nh3_BSA
1	4	K2C6A_HUMAN	Keratin, type II cytoskeletal 6A OS=Homo sapiens GN=KRT6A PE=1 SV=3	1300	60238	51	51	9	9	Homo sapiens	9606	69442	1	0	0	665.369	1328.72	2	1328.72	0.0053	0	47.81	9.7e-05	R	NLDLDSIIAEVK	A					Ar_NoBSA
1	4	K2C6A_HUMAN	Keratin, type II cytoskeletal 6A OS=Homo sapiens GN=KRT6A PE=1 SV=3	1300	60238	51	51	9	9	Homo sapiens	9606	69445	1	0	0	665.371	1328.73	2	1328.72	0.0091	0	42.55	0.00023	R	NLDLDSIIAEVK	A					Nh3_BSA
1	4	K2C6A_HUMAN	Keratin, type II cytoskeletal 6A OS=Homo sapiens GN=KRT6A PE=1 SV=3	1300	60238	51	51	9	9	Homo sapiens	9606	69446	1	0	0	665.371	1328.73	2	1328.72	0.0098	0	44.39	0.0002	R	NLDLDSIIAEVK	A					BSA
1	4	K2C6A_HUMAN	Keratin, type II cytoskeletal 6A OS=Homo sapiens GN=KRT6A PE=1 SV=3	1300	60238	51	51	9	9	Homo sapiens	9606	69448	1	0	0	665.372	1328.73	2	1328.72	0.0101	0	54.83	7.5e-05	R	NLDLDSIIAEVK	A					Ar_NoBSA
1	4	K2C6A_HUMAN	Keratin, type II cytoskeletal 6A OS=Homo sapiens GN=KRT6A PE=1 SV=3	1300	60238	51	51	9	9	Homo sapiens	9606	69449	1	0	0	665.372	1328.73	2	1328.72	0.0103	0	47.59	0.0002	R	NLDLDSIIAEVK	A					NoBSA
1	4	K2C6A_HUMAN	Keratin, type II cytoskeletal 6A OS=Homo sapiens GN=KRT6A PE=1 SV=3	1300	60238	51	51	9	9	Homo sapiens	9606	69450	1	0	0	665.372	1328.73	2	1328.72	0.0113	0	55.66	9e-05	R	NLDLDSIIAEVK	A					Ar_BSA
1	4	K2C6A_HUMAN	Keratin, type II cytoskeletal 6A OS=Homo sapiens GN=KRT6A PE=1 SV=3	1300	60238	51	51	9	9	Homo sapiens	9606	69451	1	0	0	665.372	1328.73	2	1328.72	0.0116	0	41.94	0.00045	R	NLDLDSIIAEVK	A					Un_NoBSA
1	4	K2C6A_HUMAN	Keratin, type II cytoskeletal 6A OS=Homo sapiens GN=KRT6A PE=1 SV=3	1300	60238	51	51	9	9	Homo sapiens	9606	69452	1	0	0	665.373	1328.73	2	1328.72	0.0128	0	57.15	6.3e-05	R	NLDLDSIIAEVK	A					BSA
1	4	K2C6A_HUMAN	Keratin, type II cytoskeletal 6A OS=Homo sapiens GN=KRT6A PE=1 SV=3	1300	60238	51	51	9	9	Homo sapiens	9606	69528	1	0	0	665.864	1329.71	2	1329.7	0.0097	0	60.92	3.2e-05	R	NLDLDSIIAEVK	A	Deamidated (NQ)	0.100000000000.0			Nh3_BSA
1	4	K2C6A_HUMAN	Keratin, type II cytoskeletal 6A OS=Homo sapiens GN=KRT6A PE=1 SV=3	1300	60238	51	51	9	9	Homo sapiens	9606	69529	1	0	0	665.864	1329.71	2	1329.7	0.0115	0	50.91	0.00032	R	NLDLDSIIAEVK	A	Deamidated (NQ)	0.100000000000.0			Ar_BSA
1	4	K2C6A_HUMAN	Keratin, type II cytoskeletal 6A OS=Homo sapiens GN=KRT6A PE=1 SV=3	1300	60238	51	51	9	9	Homo sapiens	9606	71973	1	0	0	675.872	1349.73	2	1349.72	0.0112	1	46.47	4.4e-05	R	TAAENEFVTLKK	D					Nh3_NoBSA
1	4	K2C6A_HUMAN	Keratin, type II cytoskeletal 6A OS=Homo sapiens GN=KRT6A PE=1 SV=3	1300	60238	51	51	9	9	Homo sapiens	9606	76778	1	0	0	696.395	1390.78	2	1390.78	-0.0068	1	42.22	0.00025	K	LALDVEIATYRK	L					Nh3_NoBSA
1	4	K2C6A_HUMAN	Keratin, type II cytoskeletal 6A OS=Homo sapiens GN=KRT6A PE=1 SV=3	1300	60238	51	51	9	9	Homo sapiens	9606	76788	1	0	0	696.405	1390.79	2	1390.78	0.0127	1	24.77	0.0048	K	LALDVEIATYRK	L					N2_NoBSA
1	4	K2C6A_HUMAN	Keratin, type II cytoskeletal 6A OS=Homo sapiens GN=KRT6A PE=1 SV=3	1300	60238	51	51	9	9	Homo sapiens	9606	78404	1	0	0	704.355	1406.69	2	1406.7	-0.0093	0	41.87	0.00027	K	ADTLTDEINFLR	A					N2_BSA
1	4	K2C6A_HUMAN	Keratin, type II cytoskeletal 6A OS=Homo sapiens GN=KRT6A PE=1 SV=3	1300	60238	51	51	9	9	Homo sapiens	9606	78407	1	0	0	704.358	1406.7	2	1406.7	-0.0028	0	88.67	6.9e-08	K	ADTLTDEINFLR	A					Ar_BSA
1	4	K2C6A_HUMAN	Keratin, type II cytoskeletal 6A OS=Homo sapiens GN=KRT6A PE=1 SV=3	1300	60238	51	51	9	9	Homo sapiens	9606	78410	1	0	0	704.362	1406.71	2	1406.7	0.0052	0	59	1.5e-05	K	ADTLTDEINFLR	A					Nh3_BSA
1	4	K2C6A_HUMAN	Keratin, type II cytoskeletal 6A OS=Homo sapiens GN=KRT6A PE=1 SV=3	1300	60238	51	51	9	9	Homo sapiens	9606	78411	1	0	0	704.362	1406.71	2	1406.7	0.0056	0	69.44	1.2e-06	K	ADTLTDEINFLR	A					BSA
1	4	K2C6A_HUMAN	Keratin, type II cytoskeletal 6A OS=Homo sapiens GN=KRT6A PE=1 SV=3	1300	60238	51	51	9	9	Homo sapiens	9606	78412	1	0	0	704.363	1406.71	2	1406.7	0.0069	0	54.83	3.5e-05	K	ADTLTDEINFLR	A					Ar_NoBSA
1	4	K2C6A_HUMAN	Keratin, type II cytoskeletal 6A OS=Homo sapiens GN=KRT6A PE=1 SV=3	1300	60238	51	51	9	9	Homo sapiens	9606	78413	1	0	0	704.363	1406.71	2	1406.7	0.007	0	53.76	2e-05	K	ADTLTDEINFLR	A					Un_NoBSA
1	4	K2C6A_HUMAN	Keratin, type II cytoskeletal 6A OS=Homo sapiens GN=KRT6A PE=1 SV=3	1300	60238	51	51	9	9	Homo sapiens	9606	78414	1	0	0	704.363	1406.71	2	1406.7	0.0072	0	45.9	5e-05	K	ADTLTDEINFLR	A					Ar_NoBSA
1	4	K2C6A_HUMAN	Keratin, type II cytoskeletal 6A OS=Homo sapiens GN=KRT6A PE=1 SV=3	1300	60238	51	51	9	9	Homo sapiens	9606	78415	1	0	0	704.363	1406.71	2	1406.7	0.0074	0	66.03	9.2e-06	K	ADTLTDEINFLR	A					Un_BSA
1	4	K2C6A_HUMAN	Keratin, type II cytoskeletal 6A OS=Homo sapiens GN=KRT6A PE=1 SV=3	1300	60238	51	51	9	9	Homo sapiens	9606	78416	1	0	0	704.364	1406.71	2	1406.7	0.0096	0	79.47	1.6e-07	K	ADTLTDEINFLR	A					Un_BSA
1	4	K2C6A_HUMAN	Keratin, type II cytoskeletal 6A OS=Homo sapiens GN=KRT6A PE=1 SV=3	1300	60238	51	51	9	9	Homo sapiens	9606	78417	1	0	0	704.365	1406.72	2	1406.7	0.0111	0	71.67	9.9e-07	K	ADTLTDEINFLR	A					BSA
1	4	K2C6A_HUMAN	Keratin, type II cytoskeletal 6A OS=Homo sapiens GN=KRT6A PE=1 SV=3	1300	60238	51	51	9	9	Homo sapiens	9606	78418	1	0	0	704.365	1406.72	2	1406.7	0.0119	0	66.87	3.8e-06	K	ADTLTDEINFLR	A					Ar_BSA
1	4	K2C6A_HUMAN	Keratin, type II cytoskeletal 6A OS=Homo sapiens GN=KRT6A PE=1 SV=3	1300	60238	51	51	9	9	Homo sapiens	9606	78420	1	0	0	704.366	1406.72	2	1406.7	0.0125	0	94	2e-08	K	ADTLTDEINFLR	A					Nh3_NoBSA
1	4	K2C6A_HUMAN	Keratin, type II cytoskeletal 6A OS=Homo sapiens GN=KRT6A PE=1 SV=3	1300	60238	51	51	9	9	Homo sapiens	9606	78421	1	0	0	704.366	1406.72	2	1406.7	0.0128	0	49.87	0.00011	K	ADTLTDEINFLR	A					Nh3_NoBSA
1	4	K2C6A_HUMAN	Keratin, type II cytoskeletal 6A OS=Homo sapiens GN=KRT6A PE=1 SV=3	1300	60238	51	51	9	9	Homo sapiens	9606	78422	1	0	0	704.366	1406.72	2	1406.7	0.0128	0	74.92	1.1e-06	K	ADTLTDEINFLR	A					NoBSA
1	4	K2C6A_HUMAN	Keratin, type II cytoskeletal 6A OS=Homo sapiens GN=KRT6A PE=1 SV=3	1300	60238	51	51	9	9	Homo sapiens	9606	78423	1	0	0	704.366	1406.72	2	1406.7	0.0131	0	71.36	2.4e-06	K	ADTLTDEINFLR	A					Un_NoBSA
1	4	K2C6A_HUMAN	Keratin, type II cytoskeletal 6A OS=Homo sapiens GN=KRT6A PE=1 SV=3	1300	60238	51	51	9	9	Homo sapiens	9606	78424	1	0	0	704.366	1406.72	2	1406.7	0.0139	0	59.89	3e-05	K	ADTLTDEINFLR	A					Un_BSA
1	4	K2C6A_HUMAN	Keratin, type II cytoskeletal 6A OS=Homo sapiens GN=KRT6A PE=1 SV=3	1300	60238	51	51	9	9	Homo sapiens	9606	82420	1	0	1	724.389	1446.76	2	1446.77	-0.0041	0	26.41	0.0033	R	AIGGGLSSVGGGSSTIK	Y					N2_BSA
1	4	K2C6A_HUMAN	Keratin, type II cytoskeletal 6A OS=Homo sapiens GN=KRT6A PE=1 SV=3	1300	60238	51	51	9	9	Homo sapiens	9606	82421	1	0	1	724.39	1446.77	2	1446.77	-0.0023	0	52.12	1.3e-05	R	AIGGGLSSVGGGSSTIK	Y					Nh3_NoBSA
1	4	K2C6A_HUMAN	Keratin, type II cytoskeletal 6A OS=Homo sapiens GN=KRT6A PE=1 SV=3	1300	60238	51	51	9	9	Homo sapiens	9606	82426	1	0	1	724.392	1446.77	2	1446.77	0.0012	0	28.59	0.0023	R	AIGGGLSSVGGGSSTIK	Y					BSA
1	4	K2C6A_HUMAN	Keratin, type II cytoskeletal 6A OS=Homo sapiens GN=KRT6A PE=1 SV=3	1300	60238	51	51	9	9	Homo sapiens	9606	129916	1	0	0	806.754	2417.24	3	2417.24	-0.005	1	39.24	0.00021	R	NLDLDSIIAEVKAQYEEIAQR	S					Ar_BSA
1	4	K2C6A_HUMAN	Keratin, type II cytoskeletal 6A OS=Homo sapiens GN=KRT6A PE=1 SV=3	1300	60238	51	51	9	9	Homo sapiens	9606	129917	1	0	0	806.757	2417.25	3	2417.24	0.0058	1	33.31	0.00075	R	NLDLDSIIAEVKAQYEEIAQR	S					Un_NoBSA
1	5	K2C5_HUMAN	Keratin, type II cytoskeletal 5 OS=Homo sapiens GN=KRT5 PE=1 SV=3	1087	62524	53	53	11	11	Homo sapiens	9606	51833	1	0	1	597.796	1193.58	2	1193.57	0.0099	0	53.73	4.4e-05	K	YEELQQTAGR	H					BSA
1	5	K2C5_HUMAN	Keratin, type II cytoskeletal 5 OS=Homo sapiens GN=KRT5 PE=1 SV=3	1087	62524	53	53	11	11	Homo sapiens	9606	52979	1	0	0	602.323	1202.63	2	1202.63	0.0015	0	29.64	0.0079	K	WTLLQEQGTK	T					NoBSA
1	5	K2C5_HUMAN	Keratin, type II cytoskeletal 5 OS=Homo sapiens GN=KRT5 PE=1 SV=3	1087	62524	53	53	11	11	Homo sapiens	9606	58001	1	0	1	621.79	1241.56	2	1241.56	0.0083	0	41.26	0.00026	R	TEAESWYQTK	Y					Ar_BSA
1	5	K2C5_HUMAN	Keratin, type II cytoskeletal 5 OS=Homo sapiens GN=KRT5 PE=1 SV=3	1087	62524	53	53	11	11	Homo sapiens	9606	58003	1	0	1	621.79	1241.57	2	1241.56	0.0101	0	43.56	0.00018	R	TEAESWYQTK	Y					Ar_BSA
1	5	K2C5_HUMAN	Keratin, type II cytoskeletal 5 OS=Homo sapiens GN=KRT5 PE=1 SV=3	1087	62524	53	53	11	11	Homo sapiens	9606	58004	1	0	1	621.791	1241.57	2	1241.56	0.0109	0	44.27	7.1e-05	R	TEAESWYQTK	Y					N2_BSA
1	5	K2C5_HUMAN	Keratin, type II cytoskeletal 5 OS=Homo sapiens GN=KRT5 PE=1 SV=3	1087	62524	53	53	11	11	Homo sapiens	9606	58005	1	0	1	621.792	1241.57	2	1241.56	0.0124	0	28.39	0.0022	R	TEAESWYQTK	Y					Un_NoBSA
1	5	K2C5_HUMAN	Keratin, type II cytoskeletal 5 OS=Homo sapiens GN=KRT5 PE=1 SV=3	1087	62524	53	53	11	11	Homo sapiens	9606	60687	1	0	0	632.347	1262.68	2	1262.69	-0.0073	0	80.78	2.7e-07	K	LALDVEIATYR	K					Nh3_NoBSA
1	5	K2C5_HUMAN	Keratin, type II cytoskeletal 5 OS=Homo sapiens GN=KRT5 PE=1 SV=3	1087	62524	53	53	11	11	Homo sapiens	9606	60691	1	0	0	632.352	1262.69	2	1262.69	0.003	0	45.89	0.00072	K	LALDVEIATYR	K					NoBSA
1	5	K2C5_HUMAN	Keratin, type II cytoskeletal 5 OS=Homo sapiens GN=KRT5 PE=1 SV=3	1087	62524	53	53	11	11	Homo sapiens	9606	60692	1	0	0	632.353	1262.69	2	1262.69	0.0047	0	73.67	1.2e-06	K	LALDVEIATYR	K					Ar_BSA
1	5	K2C5_HUMAN	Keratin, type II cytoskeletal 5 OS=Homo sapiens GN=KRT5 PE=1 SV=3	1087	62524	53	53	11	11	Homo sapiens	9606	60696	1	0	0	632.354	1262.69	2	1262.69	0.0063	0	52.8	0.00014	K	LALDVEIATYR	K					Un_NoBSA
1	5	K2C5_HUMAN	Keratin, type II cytoskeletal 5 OS=Homo sapiens GN=KRT5 PE=1 SV=3	1087	62524	53	53	11	11	Homo sapiens	9606	60697	1	0	0	632.354	1262.69	2	1262.69	0.007	0	47.8	0.00044	K	LALDVEIATYR	K					Ar_BSA
1	5	K2C5_HUMAN	Keratin, type II cytoskeletal 5 OS=Homo sapiens GN=KRT5 PE=1 SV=3	1087	62524	53	53	11	11	Homo sapiens	9606	131676	1	0	0	632.355	1262.7	2	1262.69	0.0084	0	58.97	3.4e-05	K	LALDVEIATYR	K					Nh3_BSA
1	5	K2C5_HUMAN	Keratin, type II cytoskeletal 5 OS=Homo sapiens GN=KRT5 PE=1 SV=3	1087	62524	53	53	11	11	Homo sapiens	9606	60699	1	0	0	632.355	1262.7	2	1262.69	0.0085	0	66.37	6.2e-06	K	LALDVEIATYR	K					Nh3_BSA
1	5	K2C5_HUMAN	Keratin, type II cytoskeletal 5 OS=Homo sapiens GN=KRT5 PE=1 SV=3	1087	62524	53	53	11	11	Homo sapiens	9606	60700	1	0	0	632.355	1262.7	2	1262.69	0.0085	0	44.56	0.00078	K	LALDVEIATYR	K					BSA
1	5	K2C5_HUMAN	Keratin, type II cytoskeletal 5 OS=Homo sapiens GN=KRT5 PE=1 SV=3	1087	62524	53	53	11	11	Homo sapiens	9606	60459	1	0	0	632.355	1262.7	2	1262.69	0.0091	0	55.47	7.5e-05	K	LALDVEIATYR	K					Ar_NoBSA
1	5	K2C5_HUMAN	Keratin, type II cytoskeletal 5 OS=Homo sapiens GN=KRT5 PE=1 SV=3	1087	62524	53	53	11	11	Homo sapiens	9606	60702	1	0	0	632.356	1262.7	2	1262.69	0.01	0	74.95	9e-07	K	LALDVEIATYR	K					Ar_NoBSA
1	5	K2C5_HUMAN	Keratin, type II cytoskeletal 5 OS=Homo sapiens GN=KRT5 PE=1 SV=3	1087	62524	53	53	11	11	Homo sapiens	9606	131678	1	0	0	632.356	1262.7	2	1262.69	0.0101	0	83.1	1.3e-07	K	LALDVEIATYR	K					Un_BSA
1	5	K2C5_HUMAN	Keratin, type II cytoskeletal 5 OS=Homo sapiens GN=KRT5 PE=1 SV=3	1087	62524	53	53	11	11	Homo sapiens	9606	60703	1	0	0	632.356	1262.7	2	1262.69	0.0106	0	70.12	2.6e-06	K	LALDVEIATYR	K					N2_NoBSA
1	5	K2C5_HUMAN	Keratin, type II cytoskeletal 5 OS=Homo sapiens GN=KRT5 PE=1 SV=3	1087	62524	53	53	11	11	Homo sapiens	9606	61341	1	0	1	634.347	1266.68	2	1266.67	0.0114	1	46.46	5.5e-05	K	RISISTSGGSFR	N					Nh3_BSA
1	5	K2C5_HUMAN	Keratin, type II cytoskeletal 5 OS=Homo sapiens GN=KRT5 PE=1 SV=3	1087	62524	53	53	11	11	Homo sapiens	9606	69438	1	0	0	665.367	1328.72	2	1328.72	0.0015	0	55.02	0.0001	R	NLDLDSIIAEVK	A					Un_NoBSA
1	5	K2C5_HUMAN	Keratin, type II cytoskeletal 5 OS=Homo sapiens GN=KRT5 PE=1 SV=3	1087	62524	53	53	11	11	Homo sapiens	9606	69440	1	0	0	665.369	1328.72	2	1328.72	0.0039	0	60.53	2.9e-05	R	NLDLDSIIAEVK	A					N2_NoBSA
1	5	K2C5_HUMAN	Keratin, type II cytoskeletal 5 OS=Homo sapiens GN=KRT5 PE=1 SV=3	1087	62524	53	53	11	11	Homo sapiens	9606	69441	1	0	0	665.369	1328.72	2	1328.72	0.0047	0	35.09	0.0016	R	NLDLDSIIAEVK	A					Nh3_BSA
1	5	K2C5_HUMAN	Keratin, type II cytoskeletal 5 OS=Homo sapiens GN=KRT5 PE=1 SV=3	1087	62524	53	53	11	11	Homo sapiens	9606	69442	1	0	0	665.369	1328.72	2	1328.72	0.0053	0	47.81	9.7e-05	R	NLDLDSIIAEVK	A					Ar_NoBSA
1	5	K2C5_HUMAN	Keratin, type II cytoskeletal 5 OS=Homo sapiens GN=KRT5 PE=1 SV=3	1087	62524	53	53	11	11	Homo sapiens	9606	69445	1	0	0	665.371	1328.73	2	1328.72	0.0091	0	42.55	0.00023	R	NLDLDSIIAEVK	A					Nh3_BSA
1	5	K2C5_HUMAN	Keratin, type II cytoskeletal 5 OS=Homo sapiens GN=KRT5 PE=1 SV=3	1087	62524	53	53	11	11	Homo sapiens	9606	69446	1	0	0	665.371	1328.73	2	1328.72	0.0098	0	44.39	0.0002	R	NLDLDSIIAEVK	A					BSA
1	5	K2C5_HUMAN	Keratin, type II cytoskeletal 5 OS=Homo sapiens GN=KRT5 PE=1 SV=3	1087	62524	53	53	11	11	Homo sapiens	9606	69448	1	0	0	665.372	1328.73	2	1328.72	0.0101	0	54.83	7.5e-05	R	NLDLDSIIAEVK	A					Ar_NoBSA
1	5	K2C5_HUMAN	Keratin, type II cytoskeletal 5 OS=Homo sapiens GN=KRT5 PE=1 SV=3	1087	62524	53	53	11	11	Homo sapiens	9606	69449	1	0	0	665.372	1328.73	2	1328.72	0.0103	0	47.59	0.0002	R	NLDLDSIIAEVK	A					NoBSA
1	5	K2C5_HUMAN	Keratin, type II cytoskeletal 5 OS=Homo sapiens GN=KRT5 PE=1 SV=3	1087	62524	53	53	11	11	Homo sapiens	9606	69450	1	0	0	665.372	1328.73	2	1328.72	0.0113	0	55.66	9e-05	R	NLDLDSIIAEVK	A					Ar_BSA
1	5	K2C5_HUMAN	Keratin, type II cytoskeletal 5 OS=Homo sapiens GN=KRT5 PE=1 SV=3	1087	62524	53	53	11	11	Homo sapiens	9606	69451	1	0	0	665.372	1328.73	2	1328.72	0.0116	0	41.94	0.00045	R	NLDLDSIIAEVK	A					Un_NoBSA
1	5	K2C5_HUMAN	Keratin, type II cytoskeletal 5 OS=Homo sapiens GN=KRT5 PE=1 SV=3	1087	62524	53	53	11	11	Homo sapiens	9606	69452	1	0	0	665.373	1328.73	2	1328.72	0.0128	0	57.15	6.3e-05	R	NLDLDSIIAEVK	A					BSA
1	5	K2C5_HUMAN	Keratin, type II cytoskeletal 5 OS=Homo sapiens GN=KRT5 PE=1 SV=3	1087	62524	53	53	11	11	Homo sapiens	9606	69528	1	0	0	665.864	1329.71	2	1329.7	0.0097	0	60.92	3.2e-05	R	NLDLDSIIAEVK	A	Deamidated (NQ)	0.100000000000.0			Nh3_BSA
1	5	K2C5_HUMAN	Keratin, type II cytoskeletal 5 OS=Homo sapiens GN=KRT5 PE=1 SV=3	1087	62524	53	53	11	11	Homo sapiens	9606	69529	1	0	0	665.864	1329.71	2	1329.7	0.0115	0	50.91	0.00032	R	NLDLDSIIAEVK	A	Deamidated (NQ)	0.100000000000.0			Ar_BSA
1	5	K2C5_HUMAN	Keratin, type II cytoskeletal 5 OS=Homo sapiens GN=KRT5 PE=1 SV=3	1087	62524	53	53	11	11	Homo sapiens	9606	76778	1	0	0	696.395	1390.78	2	1390.78	-0.0068	1	42.22	0.00025	K	LALDVEIATYRK	L					Nh3_NoBSA
1	5	K2C5_HUMAN	Keratin, type II cytoskeletal 5 OS=Homo sapiens GN=KRT5 PE=1 SV=3	1087	62524	53	53	11	11	Homo sapiens	9606	76788	1	0	0	696.405	1390.79	2	1390.78	0.0127	1	24.77	0.0048	K	LALDVEIATYRK	L					N2_NoBSA
1	5	K2C5_HUMAN	Keratin, type II cytoskeletal 5 OS=Homo sapiens GN=KRT5 PE=1 SV=3	1087	62524	53	53	11	11	Homo sapiens	9606	78665	1	0	1	705.862	1409.71	2	1409.72	-0.0052	0	46.49	0.00011	R	SFSTASAITPSVSR	T					Un_NoBSA
1	5	K2C5_HUMAN	Keratin, type II cytoskeletal 5 OS=Homo sapiens GN=KRT5 PE=1 SV=3	1087	62524	53	53	11	11	Homo sapiens	9606	78668	1	0	1	705.863	1409.71	2	1409.72	-0.0028	0	43.85	0.00012	R	SFSTASAITPSVSR	T					Ar_BSA
1	5	K2C5_HUMAN	Keratin, type II cytoskeletal 5 OS=Homo sapiens GN=KRT5 PE=1 SV=3	1087	62524	53	53	11	11	Homo sapiens	9606	78670	1	0	1	705.866	1409.72	2	1409.72	0.0016	0	46.63	9.5e-05	R	SFSTASAITPSVSR	T					N2_BSA
1	5	K2C5_HUMAN	Keratin, type II cytoskeletal 5 OS=Homo sapiens GN=KRT5 PE=1 SV=3	1087	62524	53	53	11	11	Homo sapiens	9606	78671	1	0	1	705.866	1409.72	2	1409.72	0.0035	0	43.33	8.6e-05	R	SFSTASAITPSVSR	T					Nh3_NoBSA
1	5	K2C5_HUMAN	Keratin, type II cytoskeletal 5 OS=Homo sapiens GN=KRT5 PE=1 SV=3	1087	62524	53	53	11	11	Homo sapiens	9606	80330	1	0	1	713.866	1425.72	2	1425.72	0.0006	1	58.37	1.2e-05	R	TTAENEFVMLKK	D	Oxidation (M)	0.000000002000.0			Nh3_NoBSA
1	5	K2C5_HUMAN	Keratin, type II cytoskeletal 5 OS=Homo sapiens GN=KRT5 PE=1 SV=3	1087	62524	53	53	11	11	Homo sapiens	9606	80334	1	0	1	713.871	1425.73	2	1425.72	0.0108	1	48.18	6.9e-05	R	TTAENEFVMLKK	D	Oxidation (M)	0.000000002000.0			Ar_BSA
1	5	K2C5_HUMAN	Keratin, type II cytoskeletal 5 OS=Homo sapiens GN=KRT5 PE=1 SV=3	1087	62524	53	53	11	11	Homo sapiens	9606	80335	1	0	1	713.872	1425.73	2	1425.72	0.0125	1	38.26	0.00034	R	TTAENEFVMLKK	D	Oxidation (M)	0.000000002000.0			Un_NoBSA
1	5	K2C5_HUMAN	Keratin, type II cytoskeletal 5 OS=Homo sapiens GN=KRT5 PE=1 SV=3	1087	62524	53	53	11	11	Homo sapiens	9606	83015	1	0	1	727.874	1453.73	2	1453.72	0.0096	1	32.06	0.0017	K	RTTAENEFVMLK	K	Oxidation (M)	0.000000000200.0			Nh3_BSA
1	5	K2C5_HUMAN	Keratin, type II cytoskeletal 5 OS=Homo sapiens GN=KRT5 PE=1 SV=3	1087	62524	53	53	11	11	Homo sapiens	9606	83286	1	0	1	729.334	1456.65	2	1456.66	-0.0047	0	35.85	0.00043	K	VDALMDEINFMK	M	2 Oxidation (M)	0.000020000020.0			NoBSA
1	5	K2C5_HUMAN	Keratin, type II cytoskeletal 5 OS=Homo sapiens GN=KRT5 PE=1 SV=3	1087	62524	53	53	11	11	Homo sapiens	9606	83298	1	0	1	729.337	1456.66	2	1456.66	0.0016	0	58.08	1.2e-05	K	VDALMDEINFMK	M	2 Oxidation (M)	0.000020000020.0			Nh3_BSA
1	5	K2C5_HUMAN	Keratin, type II cytoskeletal 5 OS=Homo sapiens GN=KRT5 PE=1 SV=3	1087	62524	53	53	11	11	Homo sapiens	9606	83300	1	0	1	729.337	1456.66	2	1456.66	0.0018	0	32.45	0.00091	K	VDALMDEINFMK	M	2 Oxidation (M)	0.000020000020.0			Un_NoBSA
1	5	K2C5_HUMAN	Keratin, type II cytoskeletal 5 OS=Homo sapiens GN=KRT5 PE=1 SV=3	1087	62524	53	53	11	11	Homo sapiens	9606	83304	1	0	1	729.338	1456.66	2	1456.66	0.0038	0	45.33	5.6e-05	K	VDALMDEINFMK	M	2 Oxidation (M)	0.000020000020.0			BSA
1	5	K2C5_HUMAN	Keratin, type II cytoskeletal 5 OS=Homo sapiens GN=KRT5 PE=1 SV=3	1087	62524	53	53	11	11	Homo sapiens	9606	83308	1	0	1	729.338	1456.66	2	1456.66	0.0047	0	41.41	0.00013	K	VDALMDEINFMK	M	2 Oxidation (M)	0.000020000020.0			Un_BSA
1	5	K2C5_HUMAN	Keratin, type II cytoskeletal 5 OS=Homo sapiens GN=KRT5 PE=1 SV=3	1087	62524	53	53	11	11	Homo sapiens	9606	83309	1	0	1	729.339	1456.66	2	1456.66	0.0052	0	40.08	0.00017	K	VDALMDEINFMK	M	2 Oxidation (M)	0.000020000020.0			BSA
1	5	K2C5_HUMAN	Keratin, type II cytoskeletal 5 OS=Homo sapiens GN=KRT5 PE=1 SV=3	1087	62524	53	53	11	11	Homo sapiens	9606	83313	1	0	1	729.34	1456.66	2	1456.66	0.0072	0	31.19	0.0014	K	VDALMDEINFMK	M	2 Oxidation (M)	0.000020000020.0			BSA
1	5	K2C5_HUMAN	Keratin, type II cytoskeletal 5 OS=Homo sapiens GN=KRT5 PE=1 SV=3	1087	62524	53	53	11	11	Homo sapiens	9606	83314	1	0	1	729.341	1456.67	2	1456.66	0.0092	0	39.99	0.00018	K	VDALMDEINFMK	M	2 Oxidation (M)	0.000020000020.0			Un_BSA
1	5	K2C5_HUMAN	Keratin, type II cytoskeletal 5 OS=Homo sapiens GN=KRT5 PE=1 SV=3	1087	62524	53	53	11	11	Homo sapiens	9606	83322	1	0	1	729.342	1456.67	2	1456.66	0.0118	0	59.26	3.7e-05	K	VDALMDEINFMK	M	2 Oxidation (M)	0.000020000020.0			Un_NoBSA
1	5	K2C5_HUMAN	Keratin, type II cytoskeletal 5 OS=Homo sapiens GN=KRT5 PE=1 SV=3	1087	62524	53	53	11	11	Homo sapiens	9606	83323	1	0	1	729.343	1456.67	2	1456.66	0.0131	0	39.87	0.0033	K	VDALMDEINFMK	M	2 Oxidation (M)	0.000020000020.0			Ar_BSA
1	5	K2C5_HUMAN	Keratin, type II cytoskeletal 5 OS=Homo sapiens GN=KRT5 PE=1 SV=3	1087	62524	53	53	11	11	Homo sapiens	9606	83327	1	0	1	729.343	1456.67	2	1456.66	0.0145	0	39.81	0.0037	K	VDALMDEINFMK	M	2 Oxidation (M)	0.000020000020.0			N2_BSA
1	6	K2C6A_RAT	Keratin, type II cytoskeletal 6A OS=Rattus norvegicus GN=Krt6a PE=1 SV=1	1059	59489	42	42	5	5	Rattus norvegicus	10116	38212	1	0	1	554.288	1106.56	2	1106.57	-0.0096	1	32.09	0.00098	K	AQYEEIAKR	S					N2_NoBSA
1	6	K2C6A_RAT	Keratin, type II cytoskeletal 6A OS=Rattus norvegicus GN=Krt6a PE=1 SV=1	1059	59489	42	42	5	5	Rattus norvegicus	10116	37902	1	0	1	554.288	1106.56	2	1106.57	-0.0095	1	31.16	0.0012	K	AQYEEIAKR	S					Nh3_BSA
1	6	K2C6A_RAT	Keratin, type II cytoskeletal 6A OS=Rattus norvegicus GN=Krt6a PE=1 SV=1	1059	59489	42	42	5	5	Rattus norvegicus	10116	38217	1	0	1	554.29	1106.56	2	1106.57	-0.0073	1	47.36	0.00083	K	AQYEEIAKR	S					Nh3_NoBSA
1	6	K2C6A_RAT	Keratin, type II cytoskeletal 6A OS=Rattus norvegicus GN=Krt6a PE=1 SV=1	1059	59489	42	42	5	5	Rattus norvegicus	10116	38270	1	0	1	554.782	1107.55	2	1107.56	-0.0063	1	38.25	0.0066	K	AQYEEIAKR	S	Deamidated (NQ)	0.010000000.0			Nh3_BSA
1	6	K2C6A_RAT	Keratin, type II cytoskeletal 6A OS=Rattus norvegicus GN=Krt6a PE=1 SV=1	1059	59489	42	42	5	5	Rattus norvegicus	10116	49753	1	0	0	590.303	1178.59	2	1178.59	-0.0024	0	33.42	0.0074	K	YEELQITAGR	H					Un_NoBSA
1	6	K2C6A_RAT	Keratin, type II cytoskeletal 6A OS=Rattus norvegicus GN=Krt6a PE=1 SV=1	1059	59489	42	42	5	5	Rattus norvegicus	10116	49761	1	0	0	590.306	1178.6	2	1178.59	0.0051	0	34.35	0.0063	K	YEELQITAGR	H					Ar_NoBSA
1	6	K2C6A_RAT	Keratin, type II cytoskeletal 6A OS=Rattus norvegicus GN=Krt6a PE=1 SV=1	1059	59489	42	42	5	5	Rattus norvegicus	10116	49763	1	0	0	590.307	1178.6	2	1178.59	0.006	0	65.29	1.2e-05	K	YEELQITAGR	H					Un_NoBSA
1	6	K2C6A_RAT	Keratin, type II cytoskeletal 6A OS=Rattus norvegicus GN=Krt6a PE=1 SV=1	1059	59489	42	42	5	5	Rattus norvegicus	10116	49766	1	0	0	590.308	1178.6	2	1178.59	0.008	0	57.66	7.7e-05	K	YEELQITAGR	H					N2_NoBSA
1	6	K2C6A_RAT	Keratin, type II cytoskeletal 6A OS=Rattus norvegicus GN=Krt6a PE=1 SV=1	1059	59489	42	42	5	5	Rattus norvegicus	10116	49767	1	0	0	590.308	1178.6	2	1178.59	0.0081	0	51.62	0.00031	K	YEELQITAGR	H					BSA
1	6	K2C6A_RAT	Keratin, type II cytoskeletal 6A OS=Rattus norvegicus GN=Krt6a PE=1 SV=1	1059	59489	42	42	5	5	Rattus norvegicus	10116	49771	1	0	0	590.309	1178.6	2	1178.59	0.0108	0	69.51	5.2e-06	K	YEELQITAGR	H					NoBSA
1	6	K2C6A_RAT	Keratin, type II cytoskeletal 6A OS=Rattus norvegicus GN=Krt6a PE=1 SV=1	1059	59489	42	42	5	5	Rattus norvegicus	10116	60687	1	0	0	632.347	1262.68	2	1262.69	-0.0073	0	80.78	2.7e-07	K	LALDVEIATYR	T					Nh3_NoBSA
1	6	K2C6A_RAT	Keratin, type II cytoskeletal 6A OS=Rattus norvegicus GN=Krt6a PE=1 SV=1	1059	59489	42	42	5	5	Rattus norvegicus	10116	60691	1	0	0	632.352	1262.69	2	1262.69	0.003	0	45.89	0.00072	K	LALDVEIATYR	T					NoBSA
1	6	K2C6A_RAT	Keratin, type II cytoskeletal 6A OS=Rattus norvegicus GN=Krt6a PE=1 SV=1	1059	59489	42	42	5	5	Rattus norvegicus	10116	60692	1	0	0	632.353	1262.69	2	1262.69	0.0047	0	73.67	1.2e-06	K	LALDVEIATYR	T					Ar_BSA
1	6	K2C6A_RAT	Keratin, type II cytoskeletal 6A OS=Rattus norvegicus GN=Krt6a PE=1 SV=1	1059	59489	42	42	5	5	Rattus norvegicus	10116	60696	1	0	0	632.354	1262.69	2	1262.69	0.0063	0	52.8	0.00014	K	LALDVEIATYR	T					Un_NoBSA
1	6	K2C6A_RAT	Keratin, type II cytoskeletal 6A OS=Rattus norvegicus GN=Krt6a PE=1 SV=1	1059	59489	42	42	5	5	Rattus norvegicus	10116	60697	1	0	0	632.354	1262.69	2	1262.69	0.007	0	47.8	0.00044	K	LALDVEIATYR	T					Ar_BSA
1	6	K2C6A_RAT	Keratin, type II cytoskeletal 6A OS=Rattus norvegicus GN=Krt6a PE=1 SV=1	1059	59489	42	42	5	5	Rattus norvegicus	10116	131676	1	0	0	632.355	1262.7	2	1262.69	0.0084	0	58.97	3.4e-05	K	LALDVEIATYR	T					Nh3_BSA
1	6	K2C6A_RAT	Keratin, type II cytoskeletal 6A OS=Rattus norvegicus GN=Krt6a PE=1 SV=1	1059	59489	42	42	5	5	Rattus norvegicus	10116	60699	1	0	0	632.355	1262.7	2	1262.69	0.0085	0	66.37	6.2e-06	K	LALDVEIATYR	T					Nh3_BSA
1	6	K2C6A_RAT	Keratin, type II cytoskeletal 6A OS=Rattus norvegicus GN=Krt6a PE=1 SV=1	1059	59489	42	42	5	5	Rattus norvegicus	10116	60700	1	0	0	632.355	1262.7	2	1262.69	0.0085	0	44.56	0.00078	K	LALDVEIATYR	T					BSA
1	6	K2C6A_RAT	Keratin, type II cytoskeletal 6A OS=Rattus norvegicus GN=Krt6a PE=1 SV=1	1059	59489	42	42	5	5	Rattus norvegicus	10116	60459	1	0	0	632.355	1262.7	2	1262.69	0.0091	0	55.47	7.5e-05	K	LALDVEIATYR	T					Ar_NoBSA
1	6	K2C6A_RAT	Keratin, type II cytoskeletal 6A OS=Rattus norvegicus GN=Krt6a PE=1 SV=1	1059	59489	42	42	5	5	Rattus norvegicus	10116	60702	1	0	0	632.356	1262.7	2	1262.69	0.01	0	74.95	9e-07	K	LALDVEIATYR	T					Ar_NoBSA
1	6	K2C6A_RAT	Keratin, type II cytoskeletal 6A OS=Rattus norvegicus GN=Krt6a PE=1 SV=1	1059	59489	42	42	5	5	Rattus norvegicus	10116	131678	1	0	0	632.356	1262.7	2	1262.69	0.0101	0	83.1	1.3e-07	K	LALDVEIATYR	T					Un_BSA
1	6	K2C6A_RAT	Keratin, type II cytoskeletal 6A OS=Rattus norvegicus GN=Krt6a PE=1 SV=1	1059	59489	42	42	5	5	Rattus norvegicus	10116	60703	1	0	0	632.356	1262.7	2	1262.69	0.0106	0	70.12	2.6e-06	K	LALDVEIATYR	T					N2_NoBSA
1	6	K2C6A_RAT	Keratin, type II cytoskeletal 6A OS=Rattus norvegicus GN=Krt6a PE=1 SV=1	1059	59489	42	42	5	5	Rattus norvegicus	10116	65648	1	0	0	651.861	1301.71	2	1301.71	-0.0003	0	65.06	1.1e-05	R	SLDLDSIIAEVK	A					Un_NoBSA
1	6	K2C6A_RAT	Keratin, type II cytoskeletal 6A OS=Rattus norvegicus GN=Krt6a PE=1 SV=1	1059	59489	42	42	5	5	Rattus norvegicus	10116	114672	1	0	0	651.863	1301.71	2	1301.71	0.0033	0	38.64	0.00024	R	SLDLDSIIAEVK	A					NoBSA
1	6	K2C6A_RAT	Keratin, type II cytoskeletal 6A OS=Rattus norvegicus GN=Krt6a PE=1 SV=1	1059	59489	42	42	5	5	Rattus norvegicus	10116	65665	1	0	0	651.863	1301.71	2	1301.71	0.0042	0	29.7	0.0016	R	SLDLDSIIAEVK	A					N2_BSA
1	6	K2C6A_RAT	Keratin, type II cytoskeletal 6A OS=Rattus norvegicus GN=Krt6a PE=1 SV=1	1059	59489	42	42	5	5	Rattus norvegicus	10116	65668	1	0	0	651.864	1301.71	2	1301.71	0.0059	0	51.31	2.6e-05	R	SLDLDSIIAEVK	A					Ar_NoBSA
1	6	K2C6A_RAT	Keratin, type II cytoskeletal 6A OS=Rattus norvegicus GN=Krt6a PE=1 SV=1	1059	59489	42	42	5	5	Rattus norvegicus	10116	65672	1	0	0	651.865	1301.71	2	1301.71	0.0068	0	28.87	0.002	R	SLDLDSIIAEVK	A					Un_BSA
1	6	K2C6A_RAT	Keratin, type II cytoskeletal 6A OS=Rattus norvegicus GN=Krt6a PE=1 SV=1	1059	59489	42	42	5	5	Rattus norvegicus	10116	65374	1	0	0	651.865	1301.72	2	1301.71	0.0078	0	75.79	5.8e-07	R	SLDLDSIIAEVK	A					N2_NoBSA
1	6	K2C6A_RAT	Keratin, type II cytoskeletal 6A OS=Rattus norvegicus GN=Krt6a PE=1 SV=1	1059	59489	42	42	5	5	Rattus norvegicus	10116	65677	1	0	0	651.865	1301.72	2	1301.71	0.0082	0	45.14	5.8e-05	R	SLDLDSIIAEVK	A					BSA
1	6	K2C6A_RAT	Keratin, type II cytoskeletal 6A OS=Rattus norvegicus GN=Krt6a PE=1 SV=1	1059	59489	42	42	5	5	Rattus norvegicus	10116	65682	1	0	0	651.867	1301.72	2	1301.71	0.0108	0	58.82	1.3e-05	R	SLDLDSIIAEVK	A					Nh3_BSA
1	6	K2C6A_RAT	Keratin, type II cytoskeletal 6A OS=Rattus norvegicus GN=Krt6a PE=1 SV=1	1059	59489	42	42	5	5	Rattus norvegicus	10116	65684	1	0	0	651.867	1301.72	2	1301.71	0.0111	0	45.23	0.00015	R	SLDLDSIIAEVK	A					Ar_BSA
1	6	K2C6A_RAT	Keratin, type II cytoskeletal 6A OS=Rattus norvegicus GN=Krt6a PE=1 SV=1	1059	59489	42	42	5	5	Rattus norvegicus	10116	65380	1	0	0	651.867	1301.72	2	1301.71	0.0116	0	66.78	6e-06	R	SLDLDSIIAEVK	A					Ar_BSA
1	6	K2C6A_RAT	Keratin, type II cytoskeletal 6A OS=Rattus norvegicus GN=Krt6a PE=1 SV=1	1059	59489	42	42	5	5	Rattus norvegicus	10116	65687	1	0	0	651.867	1301.72	2	1301.71	0.0118	0	48.41	5.9e-05	R	SLDLDSIIAEVK	A					Nh3_NoBSA
1	6	K2C6A_RAT	Keratin, type II cytoskeletal 6A OS=Rattus norvegicus GN=Krt6a PE=1 SV=1	1059	59489	42	42	5	5	Rattus norvegicus	10116	65690	1	0	0	651.867	1301.72	2	1301.71	0.0118	0	79.74	3e-07	R	SLDLDSIIAEVK	A					Nh3_BSA
1	6	K2C6A_RAT	Keratin, type II cytoskeletal 6A OS=Rattus norvegicus GN=Krt6a PE=1 SV=1	1059	59489	42	42	5	5	Rattus norvegicus	10116	65691	1	0	0	651.867	1301.72	2	1301.71	0.0118	0	41.62	0.00013	R	SLDLDSIIAEVK	A					N2_BSA
1	6	K2C6A_RAT	Keratin, type II cytoskeletal 6A OS=Rattus norvegicus GN=Krt6a PE=1 SV=1	1059	59489	42	42	5	5	Rattus norvegicus	10116	65404	1	0	0	651.867	1301.72	2	1301.71	0.012	0	75.55	7.9e-07	R	SLDLDSIIAEVK	A					Nh3_NoBSA
1	6	K2C6A_RAT	Keratin, type II cytoskeletal 6A OS=Rattus norvegicus GN=Krt6a PE=1 SV=1	1059	59489	42	42	5	5	Rattus norvegicus	10116	65694	1	0	0	651.867	1301.72	2	1301.71	0.0121	0	46.43	4.4e-05	R	SLDLDSIIAEVK	A					Ar_BSA
1	6	K2C6A_RAT	Keratin, type II cytoskeletal 6A OS=Rattus norvegicus GN=Krt6a PE=1 SV=1	1059	59489	42	42	5	5	Rattus norvegicus	10116	65695	1	0	0	651.867	1301.72	2	1301.71	0.0123	0	78.78	3.8e-07	R	SLDLDSIIAEVK	A					NoBSA
1	6	K2C6A_RAT	Keratin, type II cytoskeletal 6A OS=Rattus norvegicus GN=Krt6a PE=1 SV=1	1059	59489	42	42	5	5	Rattus norvegicus	10116	65393	1	0	0	651.867	1301.72	2	1301.71	0.0125	0	54.74	2.2e-05	R	SLDLDSIIAEVK	A					N2_NoBSA
1	6	K2C6A_RAT	Keratin, type II cytoskeletal 6A OS=Rattus norvegicus GN=Krt6a PE=1 SV=1	1059	59489	42	42	5	5	Rattus norvegicus	10116	65698	1	0	0	651.868	1301.72	2	1301.71	0.0129	0	36.93	0.00034	R	SLDLDSIIAEVK	A					Nh3_BSA
1	6	K2C6A_RAT	Keratin, type II cytoskeletal 6A OS=Rattus norvegicus GN=Krt6a PE=1 SV=1	1059	59489	42	42	5	5	Rattus norvegicus	10116	65699	1	0	0	651.868	1301.72	2	1301.71	0.013	0	72.8	6.6e-07	R	SLDLDSIIAEVK	A					Un_BSA
1	6	K2C6A_RAT	Keratin, type II cytoskeletal 6A OS=Rattus norvegicus GN=Krt6a PE=1 SV=1	1059	59489	42	42	5	5	Rattus norvegicus	10116	71973	1	0	0	675.872	1349.73	2	1349.72	0.0112	1	46.47	4.4e-05	R	TAAENEFVTLKK	D					Nh3_NoBSA
1	7	K2C75_HUMAN	Keratin, type II cytoskeletal 75 OS=Homo sapiens GN=KRT75 PE=1 SV=2	672	59754	29	29	5	5	Homo sapiens	9606	47184	1	0	0	583.301	1164.59	2	1164.58	0.0108	0	46.89	0.00043	K	YEELQVTAGR	H					BSA
1	7	K2C75_HUMAN	Keratin, type II cytoskeletal 75 OS=Homo sapiens GN=KRT75 PE=1 SV=2	672	59754	29	29	5	5	Homo sapiens	9606	60687	1	0	0	632.347	1262.68	2	1262.69	-0.0073	0	80.78	2.7e-07	K	LALDVEIATYR	K					Nh3_NoBSA
1	7	K2C75_HUMAN	Keratin, type II cytoskeletal 75 OS=Homo sapiens GN=KRT75 PE=1 SV=2	672	59754	29	29	5	5	Homo sapiens	9606	60691	1	0	0	632.352	1262.69	2	1262.69	0.003	0	45.89	0.00072	K	LALDVEIATYR	K					NoBSA
1	7	K2C75_HUMAN	Keratin, type II cytoskeletal 75 OS=Homo sapiens GN=KRT75 PE=1 SV=2	672	59754	29	29	5	5	Homo sapiens	9606	60692	1	0	0	632.353	1262.69	2	1262.69	0.0047	0	73.67	1.2e-06	K	LALDVEIATYR	K					Ar_BSA
1	7	K2C75_HUMAN	Keratin, type II cytoskeletal 75 OS=Homo sapiens GN=KRT75 PE=1 SV=2	672	59754	29	29	5	5	Homo sapiens	9606	60696	1	0	0	632.354	1262.69	2	1262.69	0.0063	0	52.8	0.00014	K	LALDVEIATYR	K					Un_NoBSA
1	7	K2C75_HUMAN	Keratin, type II cytoskeletal 75 OS=Homo sapiens GN=KRT75 PE=1 SV=2	672	59754	29	29	5	5	Homo sapiens	9606	60697	1	0	0	632.354	1262.69	2	1262.69	0.007	0	47.8	0.00044	K	LALDVEIATYR	K					Ar_BSA
1	7	K2C75_HUMAN	Keratin, type II cytoskeletal 75 OS=Homo sapiens GN=KRT75 PE=1 SV=2	672	59754	29	29	5	5	Homo sapiens	9606	131676	1	0	0	632.355	1262.7	2	1262.69	0.0084	0	58.97	3.4e-05	K	LALDVEIATYR	K					Nh3_BSA
1	7	K2C75_HUMAN	Keratin, type II cytoskeletal 75 OS=Homo sapiens GN=KRT75 PE=1 SV=2	672	59754	29	29	5	5	Homo sapiens	9606	60699	1	0	0	632.355	1262.7	2	1262.69	0.0085	0	66.37	6.2e-06	K	LALDVEIATYR	K					Nh3_BSA
1	7	K2C75_HUMAN	Keratin, type II cytoskeletal 75 OS=Homo sapiens GN=KRT75 PE=1 SV=2	672	59754	29	29	5	5	Homo sapiens	9606	60700	1	0	0	632.355	1262.7	2	1262.69	0.0085	0	44.56	0.00078	K	LALDVEIATYR	K					BSA
1	7	K2C75_HUMAN	Keratin, type II cytoskeletal 75 OS=Homo sapiens GN=KRT75 PE=1 SV=2	672	59754	29	29	5	5	Homo sapiens	9606	60459	1	0	0	632.355	1262.7	2	1262.69	0.0091	0	55.47	7.5e-05	K	LALDVEIATYR	K					Ar_NoBSA
1	7	K2C75_HUMAN	Keratin, type II cytoskeletal 75 OS=Homo sapiens GN=KRT75 PE=1 SV=2	672	59754	29	29	5	5	Homo sapiens	9606	60702	1	0	0	632.356	1262.7	2	1262.69	0.01	0	74.95	9e-07	K	LALDVEIATYR	K					Ar_NoBSA
1	7	K2C75_HUMAN	Keratin, type II cytoskeletal 75 OS=Homo sapiens GN=KRT75 PE=1 SV=2	672	59754	29	29	5	5	Homo sapiens	9606	131678	1	0	0	632.356	1262.7	2	1262.69	0.0101	0	83.1	1.3e-07	K	LALDVEIATYR	K					Un_BSA
1	7	K2C75_HUMAN	Keratin, type II cytoskeletal 75 OS=Homo sapiens GN=KRT75 PE=1 SV=2	672	59754	29	29	5	5	Homo sapiens	9606	60703	1	0	0	632.356	1262.7	2	1262.69	0.0106	0	70.12	2.6e-06	K	LALDVEIATYR	K					N2_NoBSA
1	7	K2C75_HUMAN	Keratin, type II cytoskeletal 75 OS=Homo sapiens GN=KRT75 PE=1 SV=2	672	59754	29	29	5	5	Homo sapiens	9606	68013	1	0	1	660.862	1319.71	2	1319.71	0.0002	1	36.38	0.00039	R	TAAENEFVALKK	D					Ar_NoBSA
1	7	K2C75_HUMAN	Keratin, type II cytoskeletal 75 OS=Homo sapiens GN=KRT75 PE=1 SV=2	672	59754	29	29	5	5	Homo sapiens	9606	69438	1	0	0	665.367	1328.72	2	1328.72	0.0015	0	55.02	0.0001	R	NLDLDSIIAEVK	A					Un_NoBSA
1	7	K2C75_HUMAN	Keratin, type II cytoskeletal 75 OS=Homo sapiens GN=KRT75 PE=1 SV=2	672	59754	29	29	5	5	Homo sapiens	9606	69440	1	0	0	665.369	1328.72	2	1328.72	0.0039	0	60.53	2.9e-05	R	NLDLDSIIAEVK	A					N2_NoBSA
1	7	K2C75_HUMAN	Keratin, type II cytoskeletal 75 OS=Homo sapiens GN=KRT75 PE=1 SV=2	672	59754	29	29	5	5	Homo sapiens	9606	69441	1	0	0	665.369	1328.72	2	1328.72	0.0047	0	35.09	0.0016	R	NLDLDSIIAEVK	A					Nh3_BSA
1	7	K2C75_HUMAN	Keratin, type II cytoskeletal 75 OS=Homo sapiens GN=KRT75 PE=1 SV=2	672	59754	29	29	5	5	Homo sapiens	9606	69442	1	0	0	665.369	1328.72	2	1328.72	0.0053	0	47.81	9.7e-05	R	NLDLDSIIAEVK	A					Ar_NoBSA
1	7	K2C75_HUMAN	Keratin, type II cytoskeletal 75 OS=Homo sapiens GN=KRT75 PE=1 SV=2	672	59754	29	29	5	5	Homo sapiens	9606	69445	1	0	0	665.371	1328.73	2	1328.72	0.0091	0	42.55	0.00023	R	NLDLDSIIAEVK	A					Nh3_BSA
1	7	K2C75_HUMAN	Keratin, type II cytoskeletal 75 OS=Homo sapiens GN=KRT75 PE=1 SV=2	672	59754	29	29	5	5	Homo sapiens	9606	69446	1	0	0	665.371	1328.73	2	1328.72	0.0098	0	44.39	0.0002	R	NLDLDSIIAEVK	A					BSA
1	7	K2C75_HUMAN	Keratin, type II cytoskeletal 75 OS=Homo sapiens GN=KRT75 PE=1 SV=2	672	59754	29	29	5	5	Homo sapiens	9606	69448	1	0	0	665.372	1328.73	2	1328.72	0.0101	0	54.83	7.5e-05	R	NLDLDSIIAEVK	A					Ar_NoBSA
1	7	K2C75_HUMAN	Keratin, type II cytoskeletal 75 OS=Homo sapiens GN=KRT75 PE=1 SV=2	672	59754	29	29	5	5	Homo sapiens	9606	69449	1	0	0	665.372	1328.73	2	1328.72	0.0103	0	47.59	0.0002	R	NLDLDSIIAEVK	A					NoBSA
1	7	K2C75_HUMAN	Keratin, type II cytoskeletal 75 OS=Homo sapiens GN=KRT75 PE=1 SV=2	672	59754	29	29	5	5	Homo sapiens	9606	69450	1	0	0	665.372	1328.73	2	1328.72	0.0113	0	55.66	9e-05	R	NLDLDSIIAEVK	A					Ar_BSA
1	7	K2C75_HUMAN	Keratin, type II cytoskeletal 75 OS=Homo sapiens GN=KRT75 PE=1 SV=2	672	59754	29	29	5	5	Homo sapiens	9606	69451	1	0	0	665.372	1328.73	2	1328.72	0.0116	0	41.94	0.00045	R	NLDLDSIIAEVK	A					Un_NoBSA
1	7	K2C75_HUMAN	Keratin, type II cytoskeletal 75 OS=Homo sapiens GN=KRT75 PE=1 SV=2	672	59754	29	29	5	5	Homo sapiens	9606	69452	1	0	0	665.373	1328.73	2	1328.72	0.0128	0	57.15	6.3e-05	R	NLDLDSIIAEVK	A					BSA
1	7	K2C75_HUMAN	Keratin, type II cytoskeletal 75 OS=Homo sapiens GN=KRT75 PE=1 SV=2	672	59754	29	29	5	5	Homo sapiens	9606	69528	1	0	0	665.864	1329.71	2	1329.7	0.0097	0	60.92	3.2e-05	R	NLDLDSIIAEVK	A	Deamidated (NQ)	0.100000000000.0			Nh3_BSA
1	7	K2C75_HUMAN	Keratin, type II cytoskeletal 75 OS=Homo sapiens GN=KRT75 PE=1 SV=2	672	59754	29	29	5	5	Homo sapiens	9606	69529	1	0	0	665.864	1329.71	2	1329.7	0.0115	0	50.91	0.00032	R	NLDLDSIIAEVK	A	Deamidated (NQ)	0.100000000000.0			Ar_BSA
1	7	K2C75_HUMAN	Keratin, type II cytoskeletal 75 OS=Homo sapiens GN=KRT75 PE=1 SV=2	672	59754	29	29	5	5	Homo sapiens	9606	76778	1	0	0	696.395	1390.78	2	1390.78	-0.0068	1	42.22	0.00025	K	LALDVEIATYRK	L					Nh3_NoBSA
1	7	K2C75_HUMAN	Keratin, type II cytoskeletal 75 OS=Homo sapiens GN=KRT75 PE=1 SV=2	672	59754	29	29	5	5	Homo sapiens	9606	76788	1	0	0	696.405	1390.79	2	1390.78	0.0127	1	24.77	0.0048	K	LALDVEIATYRK	L					N2_NoBSA
1	8	K22E_MOUSE	Keratin, type II cytoskeletal 2 epidermal OS=Mus musculus GN=Krt2 PE=1 SV=1	631	71248	45	45	3	3	Mus musculus	10090	49780	1	0	1	590.312	1178.61	2	1178.62	-0.0087	0	37.46	0.0024	K	YEELQVTAVK	H					NoBSA
1	8	K22E_MOUSE	Keratin, type II cytoskeletal 2 epidermal OS=Mus musculus GN=Krt2 PE=1 SV=1	631	71248	45	45	3	3	Mus musculus	10090	49782	1	0	1	590.313	1178.61	2	1178.62	-0.0076	0	41.07	0.00071	K	YEELQVTAVK	H					Nh3_NoBSA
1	8	K22E_MOUSE	Keratin, type II cytoskeletal 2 epidermal OS=Mus musculus GN=Krt2 PE=1 SV=1	631	71248	45	45	3	3	Mus musculus	10090	106422	1	0	1	590.313	1178.61	2	1178.62	-0.007	0	37.07	0.001	K	YEELQVTAVK	H					Ar_BSA
1	8	K22E_MOUSE	Keratin, type II cytoskeletal 2 epidermal OS=Mus musculus GN=Krt2 PE=1 SV=1	631	71248	45	45	3	3	Mus musculus	10090	49783	1	0	1	590.313	1178.61	2	1178.62	-0.0069	0	37.59	0.0018	K	YEELQVTAVK	H					Ar_NoBSA
1	8	K22E_MOUSE	Keratin, type II cytoskeletal 2 epidermal OS=Mus musculus GN=Krt2 PE=1 SV=1	631	71248	45	45	3	3	Mus musculus	10090	49784	1	0	1	590.313	1178.61	2	1178.62	-0.0059	0	41.34	0.00088	K	YEELQVTAVK	H					BSA
1	8	K22E_MOUSE	Keratin, type II cytoskeletal 2 epidermal OS=Mus musculus GN=Krt2 PE=1 SV=1	631	71248	45	45	3	3	Mus musculus	10090	49785	1	0	1	590.314	1178.61	2	1178.62	-0.0049	0	37.64	0.0013	K	YEELQVTAVK	H					N2_NoBSA
1	8	K22E_MOUSE	Keratin, type II cytoskeletal 2 epidermal OS=Mus musculus GN=Krt2 PE=1 SV=1	631	71248	45	45	3	3	Mus musculus	10090	49786	1	0	1	590.315	1178.61	2	1178.62	-0.0033	0	41.19	0.00066	K	YEELQVTAVK	H					Nh3_NoBSA
1	8	K22E_MOUSE	Keratin, type II cytoskeletal 2 epidermal OS=Mus musculus GN=Krt2 PE=1 SV=1	631	71248	45	45	3	3	Mus musculus	10090	49787	1	0	1	590.315	1178.62	2	1178.62	-0.0021	0	41.44	0.0014	K	YEELQVTAVK	H					N2_BSA
1	8	K22E_MOUSE	Keratin, type II cytoskeletal 2 epidermal OS=Mus musculus GN=Krt2 PE=1 SV=1	631	71248	45	45	3	3	Mus musculus	10090	49788	1	0	1	590.315	1178.62	2	1178.62	-0.002	0	41.75	0.00097	K	YEELQVTAVK	H					Nh3_NoBSA
1	8	K22E_MOUSE	Keratin, type II cytoskeletal 2 epidermal OS=Mus musculus GN=Krt2 PE=1 SV=1	631	71248	45	45	3	3	Mus musculus	10090	49789	1	0	1	590.316	1178.62	2	1178.62	-0.0019	0	41.48	0.00067	K	YEELQVTAVK	H					N2_BSA
1	8	K22E_MOUSE	Keratin, type II cytoskeletal 2 epidermal OS=Mus musculus GN=Krt2 PE=1 SV=1	631	71248	45	45	3	3	Mus musculus	10090	49792	1	0	1	590.316	1178.62	2	1178.62	-0.0008	0	34.33	0.0025	K	YEELQVTAVK	H					Un_BSA
1	8	K22E_MOUSE	Keratin, type II cytoskeletal 2 epidermal OS=Mus musculus GN=Krt2 PE=1 SV=1	631	71248	45	45	3	3	Mus musculus	10090	49793	1	0	1	590.316	1178.62	2	1178.62	0	0	27.71	0.0095	K	YEELQVTAVK	H					Ar_BSA
1	8	K22E_MOUSE	Keratin, type II cytoskeletal 2 epidermal OS=Mus musculus GN=Krt2 PE=1 SV=1	631	71248	45	45	3	3	Mus musculus	10090	49794	1	0	1	590.317	1178.62	2	1178.62	0.0009	0	41.59	0.00079	K	YEELQVTAVK	H					Nh3_BSA
1	8	K22E_MOUSE	Keratin, type II cytoskeletal 2 epidermal OS=Mus musculus GN=Krt2 PE=1 SV=1	631	71248	45	45	3	3	Mus musculus	10090	49795	1	0	1	590.318	1178.62	2	1178.62	0.0034	0	37.38	0.0026	K	YEELQVTAVK	H					N2_NoBSA
1	8	K22E_MOUSE	Keratin, type II cytoskeletal 2 epidermal OS=Mus musculus GN=Krt2 PE=1 SV=1	631	71248	45	45	3	3	Mus musculus	10090	49985	1	0	1	590.806	1179.6	2	1179.6	-0.0054	0	29.67	0.01	K	YEELQVTAVK	H	Deamidated (NQ)	0.0000100000.0			Nh3_NoBSA
1	8	K22E_MOUSE	Keratin, type II cytoskeletal 2 epidermal OS=Mus musculus GN=Krt2 PE=1 SV=1	631	71248	45	45	3	3	Mus musculus	10090	106414	1	0	1	590.806	1179.6	2	1179.6	-0.0044	0	35.81	0.006	K	YEELQVTAVK	H	Deamidated (NQ)	0.0000100000.0			BSA
1	8	K22E_MOUSE	Keratin, type II cytoskeletal 2 epidermal OS=Mus musculus GN=Krt2 PE=1 SV=1	631	71248	45	45	3	3	Mus musculus	10090	78667	1	0	0	705.863	1409.71	2	1409.7	0.0104	1	29.09	0.0096	R	GFSSGSAVVSGGSRR	S					Un_NoBSA
1	8	K22E_MOUSE	Keratin, type II cytoskeletal 2 epidermal OS=Mus musculus GN=Krt2 PE=1 SV=1	631	71248	45	45	3	3	Mus musculus	10090	88935	1	0	0	762.399	1522.78	2	1522.78	0.003	1	21.89	0.0088	R	LLRDYQELMNTK	L					Un_NoBSA
1	8	K22E_MOUSE	Keratin, type II cytoskeletal 2 epidermal OS=Mus musculus GN=Krt2 PE=1 SV=1	631	71248	45	45	3	3	Mus musculus	10090	90147	1	0	0	770.393	1538.77	2	1538.78	-0.0046	1	41.69	0.00026	R	LLRDYQELMNTK	L	Oxidation (M)	0.000000002000.0			Ar_BSA
1	8	K22E_MOUSE	Keratin, type II cytoskeletal 2 epidermal OS=Mus musculus GN=Krt2 PE=1 SV=1	631	71248	45	45	3	3	Mus musculus	10090	90148	1	0	0	770.394	1538.77	2	1538.78	-0.0027	1	29.6	0.0017	R	LLRDYQELMNTK	L	Oxidation (M)	0.000000002000.0			Ar_BSA
1	8	K22E_MOUSE	Keratin, type II cytoskeletal 2 epidermal OS=Mus musculus GN=Krt2 PE=1 SV=1	631	71248	45	45	3	3	Mus musculus	10090	90151	1	0	0	770.394	1538.77	2	1538.78	-0.0024	1	42.14	0.00016	R	LLRDYQELMNTK	L	Oxidation (M)	0.000000002000.0			BSA
1	8	K22E_MOUSE	Keratin, type II cytoskeletal 2 epidermal OS=Mus musculus GN=Krt2 PE=1 SV=1	631	71248	45	45	3	3	Mus musculus	10090	90155	1	0	0	770.394	1538.77	2	1538.78	-0.0019	1	38.47	0.0011	R	LLRDYQELMNTK	L	Oxidation (M)	0.000000002000.0			N2_BSA
1	8	K22E_MOUSE	Keratin, type II cytoskeletal 2 epidermal OS=Mus musculus GN=Krt2 PE=1 SV=1	631	71248	45	45	3	3	Mus musculus	10090	90156	1	0	0	770.395	1538.78	2	1538.78	-0.0013	1	42.96	0.00012	R	LLRDYQELMNTK	L	Oxidation (M)	0.000000002000.0			Un_NoBSA
1	8	K22E_MOUSE	Keratin, type II cytoskeletal 2 epidermal OS=Mus musculus GN=Krt2 PE=1 SV=1	631	71248	45	45	3	3	Mus musculus	10090	90157	1	0	0	770.395	1538.78	2	1538.78	-0.001	1	49.51	5.4e-05	R	LLRDYQELMNTK	L	Oxidation (M)	0.000000002000.0			N2_NoBSA
1	8	K22E_MOUSE	Keratin, type II cytoskeletal 2 epidermal OS=Mus musculus GN=Krt2 PE=1 SV=1	631	71248	45	45	3	3	Mus musculus	10090	90158	1	0	0	770.395	1538.78	2	1538.78	-0.0007	1	44.74	0.00023	R	LLRDYQELMNTK	L	Oxidation (M)	0.000000002000.0			Nh3_NoBSA
1	8	K22E_MOUSE	Keratin, type II cytoskeletal 2 epidermal OS=Mus musculus GN=Krt2 PE=1 SV=1	631	71248	45	45	3	3	Mus musculus	10090	90161	1	0	0	770.395	1538.78	2	1538.78	0	1	54.31	1.6e-05	R	LLRDYQELMNTK	L	Oxidation (M)	0.000000002000.0			Un_NoBSA
1	8	K22E_MOUSE	Keratin, type II cytoskeletal 2 epidermal OS=Mus musculus GN=Krt2 PE=1 SV=1	631	71248	45	45	3	3	Mus musculus	10090	90162	1	0	0	770.396	1538.78	2	1538.78	0.001	1	48.96	0.00012	R	LLRDYQELMNTK	L	Oxidation (M)	0.000000002000.0			NoBSA
1	8	K22E_MOUSE	Keratin, type II cytoskeletal 2 epidermal OS=Mus musculus GN=Krt2 PE=1 SV=1	631	71248	45	45	3	3	Mus musculus	10090	90165	1	0	0	770.396	1538.78	2	1538.78	0.0015	1	53.17	1.9e-05	R	LLRDYQELMNTK	L	Oxidation (M)	0.000000002000.0			N2_NoBSA
1	8	K22E_MOUSE	Keratin, type II cytoskeletal 2 epidermal OS=Mus musculus GN=Krt2 PE=1 SV=1	631	71248	45	45	3	3	Mus musculus	10090	90166	1	0	0	770.396	1538.78	2	1538.78	0.0015	1	38.43	0.00036	R	LLRDYQELMNTK	L	Oxidation (M)	0.000000002000.0			N2_BSA
1	8	K22E_MOUSE	Keratin, type II cytoskeletal 2 epidermal OS=Mus musculus GN=Krt2 PE=1 SV=1	631	71248	45	45	3	3	Mus musculus	10090	90171	1	0	0	770.396	1538.78	2	1538.78	0.002	1	34.12	0.00099	R	LLRDYQELMNTK	L	Oxidation (M)	0.000000002000.0			Nh3_NoBSA
1	8	K22E_MOUSE	Keratin, type II cytoskeletal 2 epidermal OS=Mus musculus GN=Krt2 PE=1 SV=1	631	71248	45	45	3	3	Mus musculus	10090	90172	1	0	0	770.396	1538.78	2	1538.78	0.0021	1	42.18	0.00043	R	LLRDYQELMNTK	L	Oxidation (M)	0.000000002000.0			BSA
1	8	K22E_MOUSE	Keratin, type II cytoskeletal 2 epidermal OS=Mus musculus GN=Krt2 PE=1 SV=1	631	71248	45	45	3	3	Mus musculus	10090	90173	1	0	0	770.397	1538.78	2	1538.78	0.0024	1	42.85	0.00059	R	LLRDYQELMNTK	L	Oxidation (M)	0.000000002000.0			BSA
1	8	K22E_MOUSE	Keratin, type II cytoskeletal 2 epidermal OS=Mus musculus GN=Krt2 PE=1 SV=1	631	71248	45	45	3	3	Mus musculus	10090	90176	1	0	0	770.397	1538.78	2	1538.78	0.0029	1	62.35	5.8e-06	R	LLRDYQELMNTK	L	Oxidation (M)	0.000000002000.0			Ar_BSA
1	8	K22E_MOUSE	Keratin, type II cytoskeletal 2 epidermal OS=Mus musculus GN=Krt2 PE=1 SV=1	631	71248	45	45	3	3	Mus musculus	10090	90177	1	0	0	770.397	1538.78	2	1538.78	0.003	1	51.05	3.4e-05	R	LLRDYQELMNTK	L	Oxidation (M)	0.000000002000.0			Un_BSA
1	8	K22E_MOUSE	Keratin, type II cytoskeletal 2 epidermal OS=Mus musculus GN=Krt2 PE=1 SV=1	631	71248	45	45	3	3	Mus musculus	10090	90178	1	0	0	770.397	1538.78	2	1538.78	0.0033	1	52.76	4.4e-05	R	LLRDYQELMNTK	L	Oxidation (M)	0.000000002000.0			Nh3_NoBSA
1	8	K22E_MOUSE	Keratin, type II cytoskeletal 2 epidermal OS=Mus musculus GN=Krt2 PE=1 SV=1	631	71248	45	45	3	3	Mus musculus	10090	90179	1	0	0	770.397	1538.78	2	1538.78	0.0037	1	53.47	2.4e-05	R	LLRDYQELMNTK	L	Oxidation (M)	0.000000002000.0			Ar_NoBSA
1	8	K22E_MOUSE	Keratin, type II cytoskeletal 2 epidermal OS=Mus musculus GN=Krt2 PE=1 SV=1	631	71248	45	45	3	3	Mus musculus	10090	90180	1	0	0	770.397	1538.78	2	1538.78	0.0039	1	38.93	0.00034	R	LLRDYQELMNTK	L	Oxidation (M)	0.000000002000.0			Un_NoBSA
1	8	K22E_MOUSE	Keratin, type II cytoskeletal 2 epidermal OS=Mus musculus GN=Krt2 PE=1 SV=1	631	71248	45	45	3	3	Mus musculus	10090	90185	1	0	0	770.398	1538.78	2	1538.78	0.005	1	42.72	0.00023	R	LLRDYQELMNTK	L	Oxidation (M)	0.000000002000.0			Nh3_BSA
1	8	K22E_MOUSE	Keratin, type II cytoskeletal 2 epidermal OS=Mus musculus GN=Krt2 PE=1 SV=1	631	71248	45	45	3	3	Mus musculus	10090	90186	1	0	0	770.398	1538.78	2	1538.78	0.005	1	31.39	0.0048	R	LLRDYQELMNTK	L	Oxidation (M)	0.000000002000.0			NoBSA
1	8	K22E_MOUSE	Keratin, type II cytoskeletal 2 epidermal OS=Mus musculus GN=Krt2 PE=1 SV=1	631	71248	45	45	3	3	Mus musculus	10090	90187	1	0	0	770.398	1538.78	2	1538.78	0.0058	1	40.65	0.00021	R	LLRDYQELMNTK	L	Oxidation (M)	0.000000002000.0			Un_BSA
1	8	K22E_MOUSE	Keratin, type II cytoskeletal 2 epidermal OS=Mus musculus GN=Krt2 PE=1 SV=1	631	71248	45	45	3	3	Mus musculus	10090	90190	1	0	0	770.399	1538.78	2	1538.78	0.0078	1	41.19	0.00055	R	LLRDYQELMNTK	L	Oxidation (M)	0.000000002000.0			Ar_NoBSA
1	8	K22E_MOUSE	Keratin, type II cytoskeletal 2 epidermal OS=Mus musculus GN=Krt2 PE=1 SV=1	631	71248	45	45	3	3	Mus musculus	10090	90191	1	0	0	770.399	1538.78	2	1538.78	0.0078	1	44.95	0.0011	R	LLRDYQELMNTK	L	Oxidation (M)	0.000000002000.0			Ar_BSA
1	8	K22E_MOUSE	Keratin, type II cytoskeletal 2 epidermal OS=Mus musculus GN=Krt2 PE=1 SV=1	631	71248	45	45	3	3	Mus musculus	10090	90197	1	0	0	770.4	1538.79	2	1538.78	0.0092	1	50.51	2.1e-05	R	LLRDYQELMNTK	L	Oxidation (M)	0.000000002000.0			BSA
1	8	K22E_MOUSE	Keratin, type II cytoskeletal 2 epidermal OS=Mus musculus GN=Krt2 PE=1 SV=1	631	71248	45	45	3	3	Mus musculus	10090	90199	1	0	0	770.401	1538.79	2	1538.78	0.011	1	32.99	0.0064	R	LLRDYQELMNTK	L	Oxidation (M)	0.000000002000.0			Nh3_BSA
1	8	K22E_MOUSE	Keratin, type II cytoskeletal 2 epidermal OS=Mus musculus GN=Krt2 PE=1 SV=1	631	71248	45	45	3	3	Mus musculus	10090	90200	1	0	0	770.401	1538.79	2	1538.78	0.0113	1	43.57	0.00036	R	LLRDYQELMNTK	L	Oxidation (M)	0.000000002000.0			N2_NoBSA
1	9	K2M2_SHEEP	Keratin, type II microfibrillar, component 7C OS=Ovis aries PE=1 SV=1	59	55119	4	4	3	3	Ovis aries	9940	32564	1	0	1	533.807	1065.6	2	1065.6	0.002	1	31.68	0.0015	R	FAAFIDKVR	F					Nh3_NoBSA
1	9	K2M2_SHEEP	Keratin, type II microfibrillar, component 7C OS=Ovis aries PE=1 SV=1	59	55119	4	4	3	3	Ovis aries	9940	60692	2	0	1	632.353	1262.69	2	1262.69	0.0047	0	39.65	0.003	K	LGLDIEIATYR	R					Ar_BSA
1	9	K2M2_SHEEP	Keratin, type II microfibrillar, component 7C OS=Ovis aries PE=1 SV=1	59	55119	4	4	3	3	Ovis aries	9940	131678	2	0	1	632.356	1262.7	2	1262.69	0.0101	0	36.15	0.0066	K	LGLDIEIATYR	R					Un_BSA
1	9	K2M2_SHEEP	Keratin, type II microfibrillar, component 7C OS=Ovis aries PE=1 SV=1	59	55119	4	4	3	3	Ovis aries	9940	68013	1	0	1	660.862	1319.71	2	1319.71	0.0002	1	36.38	0.00039	R	ATAENEFVALKK	D					Ar_NoBSA
1	10	K2C8_MOUSE	Keratin, type II cytoskeletal 8 OS=Mus musculus GN=Krt8 PE=1 SV=4	56	54531	1	1	1	1	Mus musculus	10090	75943	1	0	1	692.864	1383.71	2	1383.7	0.01	1	56.46	7e-05	K	SLNNKFASFIDK	V	Deamidated (NQ)	0.001000000000.0			Nh3_BSA
1		K2C1_PANTR	Keratin, type II cytoskeletal 1 OS=Pan troglodytes GN=KRT1 PE=2 SV=1	14690	65588	472	472	25	25	Pan troglodytes	9598	49753	1	0	0	590.303	1178.59	2	1178.59	-0.0024	0	33.42	0.0074	K	YEELQITAGR	H					Un_NoBSA
1		K2C1_PANTR	Keratin, type II cytoskeletal 1 OS=Pan troglodytes GN=KRT1 PE=2 SV=1	14690	65588	472	472	25	25	Pan troglodytes	9598	49761	1	0	0	590.306	1178.6	2	1178.59	0.0051	0	34.35	0.0063	K	YEELQITAGR	H					Ar_NoBSA
1		K2C1_PANTR	Keratin, type II cytoskeletal 1 OS=Pan troglodytes GN=KRT1 PE=2 SV=1	14690	65588	472	472	25	25	Pan troglodytes	9598	49763	1	0	0	590.307	1178.6	2	1178.59	0.006	0	65.29	1.2e-05	K	YEELQITAGR	H					Un_NoBSA
1		K2C1_PANTR	Keratin, type II cytoskeletal 1 OS=Pan troglodytes GN=KRT1 PE=2 SV=1	14690	65588	472	472	25	25	Pan troglodytes	9598	49766	1	0	0	590.308	1178.6	2	1178.59	0.008	0	57.66	7.7e-05	K	YEELQITAGR	H					N2_NoBSA
1		K2C1_PANTR	Keratin, type II cytoskeletal 1 OS=Pan troglodytes GN=KRT1 PE=2 SV=1	14690	65588	472	472	25	25	Pan troglodytes	9598	49767	1	0	0	590.308	1178.6	2	1178.59	0.0081	0	51.62	0.00031	K	YEELQITAGR	H					BSA
1		K2C1_PANTR	Keratin, type II cytoskeletal 1 OS=Pan troglodytes GN=KRT1 PE=2 SV=1	14690	65588	472	472	25	25	Pan troglodytes	9598	49771	1	0	0	590.309	1178.6	2	1178.59	0.0108	0	69.51	5.2e-06	K	YEELQITAGR	H					NoBSA
1		K2C1_PANTR	Keratin, type II cytoskeletal 1 OS=Pan troglodytes GN=KRT1 PE=2 SV=1	14690	65588	472	472	25	25	Pan troglodytes	9598	60867	1	0	1	633.324	1264.63	2	1264.63	0.0036	0	51.51	5.2e-05	R	TNAENEFVTIK	K					NoBSA
1		K2C1_PANTR	Keratin, type II cytoskeletal 1 OS=Pan troglodytes GN=KRT1 PE=2 SV=1	14690	65588	472	472	25	25	Pan troglodytes	9598	60873	1	0	1	633.327	1264.64	2	1264.63	0.0087	0	53.3	1.6e-05	R	TNAENEFVTIK	K					N2_BSA
1		K2C1_PANTR	Keratin, type II cytoskeletal 1 OS=Pan troglodytes GN=KRT1 PE=2 SV=1	14690	65588	472	472	25	25	Pan troglodytes	9598	60874	1	0	1	633.327	1264.64	2	1264.63	0.0087	0	39.48	0.0002	R	TNAENEFVTIK	K					Un_BSA
1		K2C1_PANTR	Keratin, type II cytoskeletal 1 OS=Pan troglodytes GN=KRT1 PE=2 SV=1	14690	65588	472	472	25	25	Pan troglodytes	9598	60875	1	0	1	633.327	1264.64	2	1264.63	0.0096	0	41.11	0.00015	R	TNAENEFVTIK	K					Ar_BSA
1		K2C1_PANTR	Keratin, type II cytoskeletal 1 OS=Pan troglodytes GN=KRT1 PE=2 SV=1	14690	65588	472	472	25	25	Pan troglodytes	9598	60879	1	0	1	633.328	1264.64	2	1264.63	0.0126	0	41.05	0.00034	R	TNAENEFVTIK	K					N2_NoBSA
1		K2C1_PANTR	Keratin, type II cytoskeletal 1 OS=Pan troglodytes GN=KRT1 PE=2 SV=1	14690	65588	472	472	25	25	Pan troglodytes	9598	62453	1	0	1	639.358	1276.7	2	1276.7	-0.001	0	46.61	0.00049	K	LALDLEIATYR	T					Ar_NoBSA
1		K2C1_PANTR	Keratin, type II cytoskeletal 1 OS=Pan troglodytes GN=KRT1 PE=2 SV=1	14690	65588	472	472	25	25	Pan troglodytes	9598	62592	1	0	1	639.36	1276.71	2	1276.7	0.0033	0	28.41	0.0022	K	LALDLEIATYR	T					N2_NoBSA
1		K2C1_PANTR	Keratin, type II cytoskeletal 1 OS=Pan troglodytes GN=KRT1 PE=2 SV=1	14690	65588	472	472	25	25	Pan troglodytes	9598	62593	1	0	1	639.361	1276.71	2	1276.7	0.0041	0	35.04	0.00052	K	LALDLEIATYR	T					Nh3_BSA
1		K2C1_PANTR	Keratin, type II cytoskeletal 1 OS=Pan troglodytes GN=KRT1 PE=2 SV=1	14690	65588	472	472	25	25	Pan troglodytes	9598	62594	1	0	1	639.361	1276.71	2	1276.7	0.0049	0	53.73	9.2e-06	K	LALDLEIATYR	T					Un_NoBSA
1		K2C1_PANTR	Keratin, type II cytoskeletal 1 OS=Pan troglodytes GN=KRT1 PE=2 SV=1	14690	65588	472	472	25	25	Pan troglodytes	9598	62595	1	0	1	639.361	1276.71	2	1276.7	0.005	0	61.66	1e-05	K	LALDLEIATYR	T					Ar_BSA
1		K2C1_PANTR	Keratin, type II cytoskeletal 1 OS=Pan troglodytes GN=KRT1 PE=2 SV=1	14690	65588	472	472	25	25	Pan troglodytes	9598	62391	1	0	1	639.361	1276.71	2	1276.7	0.0052	0	59.19	6e-06	K	LALDLEIATYR	T					Ar_BSA
1		K2C1_PANTR	Keratin, type II cytoskeletal 1 OS=Pan troglodytes GN=KRT1 PE=2 SV=1	14690	65588	472	472	25	25	Pan troglodytes	9598	62407	1	0	1	639.362	1276.71	2	1276.7	0.0078	0	61.14	1.3e-05	K	LALDLEIATYR	T					Nh3_NoBSA
1		K2C1_PANTR	Keratin, type II cytoskeletal 1 OS=Pan troglodytes GN=KRT1 PE=2 SV=1	14690	65588	472	472	25	25	Pan troglodytes	9598	62596	1	0	1	639.363	1276.71	2	1276.7	0.0079	0	34.77	0.00078	K	LALDLEIATYR	T					N2_NoBSA
1		K2C1_PANTR	Keratin, type II cytoskeletal 1 OS=Pan troglodytes GN=KRT1 PE=2 SV=1	14690	65588	472	472	25	25	Pan troglodytes	9598	62597	1	0	1	639.363	1276.71	2	1276.7	0.0084	0	59.12	3.8e-06	K	LALDLEIATYR	T					N2_NoBSA
1		K2C1_PANTR	Keratin, type II cytoskeletal 1 OS=Pan troglodytes GN=KRT1 PE=2 SV=1	14690	65588	472	472	25	25	Pan troglodytes	9598	62598	1	0	1	639.363	1276.71	2	1276.7	0.0095	0	91.35	1.3e-08	K	LALDLEIATYR	T					NoBSA
1		K2C1_PANTR	Keratin, type II cytoskeletal 1 OS=Pan troglodytes GN=KRT1 PE=2 SV=1	14690	65588	472	472	25	25	Pan troglodytes	9598	62599	1	0	1	639.364	1276.71	2	1276.7	0.0101	0	66.44	2.5e-06	K	LALDLEIATYR	T					Nh3_BSA
1		K2C1_PANTR	Keratin, type II cytoskeletal 1 OS=Pan troglodytes GN=KRT1 PE=2 SV=1	14690	65588	472	472	25	25	Pan troglodytes	9598	62600	1	0	1	639.364	1276.71	2	1276.7	0.0105	0	70.79	1.8e-06	K	LALDLEIATYR	T					Ar_BSA
1		K2C1_PANTR	Keratin, type II cytoskeletal 1 OS=Pan troglodytes GN=KRT1 PE=2 SV=1	14690	65588	472	472	25	25	Pan troglodytes	9598	62601	1	0	1	639.364	1276.71	2	1276.7	0.0106	0	62.2	1.5e-06	K	LALDLEIATYR	T					Ar_BSA
1		K2C1_PANTR	Keratin, type II cytoskeletal 1 OS=Pan troglodytes GN=KRT1 PE=2 SV=1	14690	65588	472	472	25	25	Pan troglodytes	9598	62602	1	0	1	639.364	1276.71	2	1276.7	0.0111	0	71.15	1.7e-06	K	LALDLEIATYR	T					Nh3_BSA
1		K2C1_PANTR	Keratin, type II cytoskeletal 1 OS=Pan troglodytes GN=KRT1 PE=2 SV=1	14690	65588	472	472	25	25	Pan troglodytes	9598	62603	1	0	1	639.364	1276.71	2	1276.7	0.0112	0	32.88	0.00084	K	LALDLEIATYR	T					Nh3_NoBSA
1		K2C1_PANTR	Keratin, type II cytoskeletal 1 OS=Pan troglodytes GN=KRT1 PE=2 SV=1	14690	65588	472	472	25	25	Pan troglodytes	9598	62604	1	0	1	639.364	1276.71	2	1276.7	0.0114	0	51.13	6.9e-05	K	LALDLEIATYR	T					N2_NoBSA
1		K2C1_PANTR	Keratin, type II cytoskeletal 1 OS=Pan troglodytes GN=KRT1 PE=2 SV=1	14690	65588	472	472	25	25	Pan troglodytes	9598	62605	1	0	1	639.365	1276.71	2	1276.7	0.0118	0	46.65	4.5e-05	K	LALDLEIATYR	T					BSA
1		K2C1_PANTR	Keratin, type II cytoskeletal 1 OS=Pan troglodytes GN=KRT1 PE=2 SV=1	14690	65588	472	472	25	25	Pan troglodytes	9598	62606	1	0	1	639.365	1276.71	2	1276.7	0.0118	0	90.97	9e-09	K	LALDLEIATYR	T					Ar_BSA
1		K2C1_PANTR	Keratin, type II cytoskeletal 1 OS=Pan troglodytes GN=KRT1 PE=2 SV=1	14690	65588	472	472	25	25	Pan troglodytes	9598	62607	1	0	1	639.365	1276.71	2	1276.7	0.012	0	68.14	5.2e-07	K	LALDLEIATYR	T					N2_BSA
1		K2C1_PANTR	Keratin, type II cytoskeletal 1 OS=Pan troglodytes GN=KRT1 PE=2 SV=1	14690	65588	472	472	25	25	Pan troglodytes	9598	62608	1	0	1	639.365	1276.71	2	1276.7	0.012	0	59.82	6.1e-06	K	LALDLEIATYR	T					Un_BSA
1		K2C1_PANTR	Keratin, type II cytoskeletal 1 OS=Pan troglodytes GN=KRT1 PE=2 SV=1	14690	65588	472	472	25	25	Pan troglodytes	9598	62609	1	0	1	639.365	1276.71	2	1276.7	0.0121	0	43.83	7.8e-05	K	LALDLEIATYR	T					Ar_BSA
1		K2C1_PANTR	Keratin, type II cytoskeletal 1 OS=Pan troglodytes GN=KRT1 PE=2 SV=1	14690	65588	472	472	25	25	Pan troglodytes	9598	62610	1	0	1	639.365	1276.71	2	1276.7	0.0123	0	64.73	8.5e-07	K	LALDLEIATYR	T					Un_BSA
1		K2C1_PANTR	Keratin, type II cytoskeletal 1 OS=Pan troglodytes GN=KRT1 PE=2 SV=1	14690	65588	472	472	25	25	Pan troglodytes	9598	62613	1	0	1	639.365	1276.72	2	1276.7	0.0127	0	65.03	2.1e-06	K	LALDLEIATYR	T					N2_BSA
1		K2C1_PANTR	Keratin, type II cytoskeletal 1 OS=Pan troglodytes GN=KRT1 PE=2 SV=1	14690	65588	472	472	25	25	Pan troglodytes	9598	62614	1	0	1	639.365	1276.72	2	1276.7	0.0127	0	46.97	3.9e-05	K	LALDLEIATYR	T					N2_BSA
1		K2C1_PANTR	Keratin, type II cytoskeletal 1 OS=Pan troglodytes GN=KRT1 PE=2 SV=1	14690	65588	472	472	25	25	Pan troglodytes	9598	65621	1	0	1	651.855	1301.7	2	1301.69	0.0021	1	44.46	0.00044	R	NSKIEISELNR	V					N2_BSA
1		K2C1_PANTR	Keratin, type II cytoskeletal 1 OS=Pan troglodytes GN=KRT1 PE=2 SV=1	14690	65588	472	472	25	25	Pan troglodytes	9598	65624	1	0	1	651.856	1301.7	2	1301.69	0.0046	1	56.33	8.7e-05	R	NSKIEISELNR	V					NoBSA
1		K2C1_PANTR	Keratin, type II cytoskeletal 1 OS=Pan troglodytes GN=KRT1 PE=2 SV=1	14690	65588	472	472	25	25	Pan troglodytes	9598	65625	1	0	1	651.856	1301.7	2	1301.69	0.0046	1	57.95	6e-05	R	NSKIEISELNR	V					N2_NoBSA
1		K2C1_PANTR	Keratin, type II cytoskeletal 1 OS=Pan troglodytes GN=KRT1 PE=2 SV=1	14690	65588	472	472	25	25	Pan troglodytes	9598	65629	1	0	1	651.858	1301.7	2	1301.69	0.0075	1	53.71	0.00016	R	NSKIEISELNR	V					BSA
1		K2C1_PANTR	Keratin, type II cytoskeletal 1 OS=Pan troglodytes GN=KRT1 PE=2 SV=1	14690	65588	472	472	25	25	Pan troglodytes	9598	65631	1	0	1	651.859	1301.7	2	1301.69	0.0089	1	38.24	0.0056	R	NSKIEISELNR	V					Un_NoBSA
1		K2C1_PANTR	Keratin, type II cytoskeletal 1 OS=Pan troglodytes GN=KRT1 PE=2 SV=1	14690	65588	472	472	25	25	Pan troglodytes	9598	65632	1	0	1	651.859	1301.7	2	1301.69	0.009	1	41.13	0.0014	R	NSKIEISELNR	V					N2_NoBSA
1		K2C1_PANTR	Keratin, type II cytoskeletal 1 OS=Pan troglodytes GN=KRT1 PE=2 SV=1	14690	65588	472	472	25	25	Pan troglodytes	9598	65633	1	0	1	651.859	1301.7	2	1301.69	0.0102	1	58.03	5.7e-05	R	NSKIEISELNR	V					Nh3_NoBSA
1		K2C1_PANTR	Keratin, type II cytoskeletal 1 OS=Pan troglodytes GN=KRT1 PE=2 SV=1	14690	65588	472	472	25	25	Pan troglodytes	9598	65634	1	0	1	651.859	1301.7	2	1301.69	0.0104	1	41.39	0.0016	R	NSKIEISELNR	V					Ar_BSA
1		K2C1_PANTR	Keratin, type II cytoskeletal 1 OS=Pan troglodytes GN=KRT1 PE=2 SV=1	14690	65588	472	472	25	25	Pan troglodytes	9598	65637	1	0	1	651.86	1301.71	2	1301.69	0.0115	1	60.85	2.8e-05	R	NSKIEISELNR	V					BSA
1		K2C1_PANTR	Keratin, type II cytoskeletal 1 OS=Pan troglodytes GN=KRT1 PE=2 SV=1	14690	65588	472	472	25	25	Pan troglodytes	9598	65638	1	0	1	651.86	1301.71	2	1301.69	0.0115	1	54.65	6.3e-05	R	NSKIEISELNR	V					Nh3_NoBSA
1		K2C1_PANTR	Keratin, type II cytoskeletal 1 OS=Pan troglodytes GN=KRT1 PE=2 SV=1	14690	65588	472	472	25	25	Pan troglodytes	9598	65641	1	0	1	651.86	1301.71	2	1301.69	0.012	1	47.69	0.00022	R	NSKIEISELNR	V					Nh3_NoBSA
1		K2C1_PANTR	Keratin, type II cytoskeletal 1 OS=Pan troglodytes GN=KRT1 PE=2 SV=1	14690	65588	472	472	25	25	Pan troglodytes	9598	65648	1	0	0	651.861	1301.71	2	1301.71	-0.0003	0	65.06	1.1e-05	R	SLDLDSIIAEVK	A					Un_NoBSA
1		K2C1_PANTR	Keratin, type II cytoskeletal 1 OS=Pan troglodytes GN=KRT1 PE=2 SV=1	14690	65588	472	472	25	25	Pan troglodytes	9598	114672	1	0	0	651.863	1301.71	2	1301.71	0.0033	0	38.64	0.00024	R	SLDLDSIIAEVK	A					NoBSA
1		K2C1_PANTR	Keratin, type II cytoskeletal 1 OS=Pan troglodytes GN=KRT1 PE=2 SV=1	14690	65588	472	472	25	25	Pan troglodytes	9598	65665	1	0	0	651.863	1301.71	2	1301.71	0.0042	0	29.7	0.0016	R	SLDLDSIIAEVK	A					N2_BSA
1		K2C1_PANTR	Keratin, type II cytoskeletal 1 OS=Pan troglodytes GN=KRT1 PE=2 SV=1	14690	65588	472	472	25	25	Pan troglodytes	9598	65668	1	0	0	651.864	1301.71	2	1301.71	0.0059	0	51.31	2.6e-05	R	SLDLDSIIAEVK	A					Ar_NoBSA
1		K2C1_PANTR	Keratin, type II cytoskeletal 1 OS=Pan troglodytes GN=KRT1 PE=2 SV=1	14690	65588	472	472	25	25	Pan troglodytes	9598	65672	1	0	0	651.865	1301.71	2	1301.71	0.0068	0	28.87	0.002	R	SLDLDSIIAEVK	A					Un_BSA
1		K2C1_PANTR	Keratin, type II cytoskeletal 1 OS=Pan troglodytes GN=KRT1 PE=2 SV=1	14690	65588	472	472	25	25	Pan troglodytes	9598	65374	1	0	0	651.865	1301.72	2	1301.71	0.0078	0	75.79	5.8e-07	R	SLDLDSIIAEVK	A					N2_NoBSA
1		K2C1_PANTR	Keratin, type II cytoskeletal 1 OS=Pan troglodytes GN=KRT1 PE=2 SV=1	14690	65588	472	472	25	25	Pan troglodytes	9598	65677	1	0	0	651.865	1301.72	2	1301.71	0.0082	0	45.14	5.8e-05	R	SLDLDSIIAEVK	A					BSA
1		K2C1_PANTR	Keratin, type II cytoskeletal 1 OS=Pan troglodytes GN=KRT1 PE=2 SV=1	14690	65588	472	472	25	25	Pan troglodytes	9598	65682	1	0	0	651.867	1301.72	2	1301.71	0.0108	0	58.82	1.3e-05	R	SLDLDSIIAEVK	A					Nh3_BSA
1		K2C1_PANTR	Keratin, type II cytoskeletal 1 OS=Pan troglodytes GN=KRT1 PE=2 SV=1	14690	65588	472	472	25	25	Pan troglodytes	9598	65684	1	0	0	651.867	1301.72	2	1301.71	0.0111	0	45.23	0.00015	R	SLDLDSIIAEVK	A					Ar_BSA
1		K2C1_PANTR	Keratin, type II cytoskeletal 1 OS=Pan troglodytes GN=KRT1 PE=2 SV=1	14690	65588	472	472	25	25	Pan troglodytes	9598	65380	1	0	0	651.867	1301.72	2	1301.71	0.0116	0	66.78	6e-06	R	SLDLDSIIAEVK	A					Ar_BSA
1		K2C1_PANTR	Keratin, type II cytoskeletal 1 OS=Pan troglodytes GN=KRT1 PE=2 SV=1	14690	65588	472	472	25	25	Pan troglodytes	9598	65687	1	0	0	651.867	1301.72	2	1301.71	0.0118	0	48.41	5.9e-05	R	SLDLDSIIAEVK	A					Nh3_NoBSA
1		K2C1_PANTR	Keratin, type II cytoskeletal 1 OS=Pan troglodytes GN=KRT1 PE=2 SV=1	14690	65588	472	472	25	25	Pan troglodytes	9598	65690	1	0	0	651.867	1301.72	2	1301.71	0.0118	0	79.74	3e-07	R	SLDLDSIIAEVK	A					Nh3_BSA
1		K2C1_PANTR	Keratin, type II cytoskeletal 1 OS=Pan troglodytes GN=KRT1 PE=2 SV=1	14690	65588	472	472	25	25	Pan troglodytes	9598	65691	1	0	0	651.867	1301.72	2	1301.71	0.0118	0	41.62	0.00013	R	SLDLDSIIAEVK	A					N2_BSA
1		K2C1_PANTR	Keratin, type II cytoskeletal 1 OS=Pan troglodytes GN=KRT1 PE=2 SV=1	14690	65588	472	472	25	25	Pan troglodytes	9598	65404	1	0	0	651.867	1301.72	2	1301.71	0.012	0	75.55	7.9e-07	R	SLDLDSIIAEVK	A					Nh3_NoBSA
1		K2C1_PANTR	Keratin, type II cytoskeletal 1 OS=Pan troglodytes GN=KRT1 PE=2 SV=1	14690	65588	472	472	25	25	Pan troglodytes	9598	65694	1	0	0	651.867	1301.72	2	1301.71	0.0121	0	46.43	4.4e-05	R	SLDLDSIIAEVK	A					Ar_BSA
1		K2C1_PANTR	Keratin, type II cytoskeletal 1 OS=Pan troglodytes GN=KRT1 PE=2 SV=1	14690	65588	472	472	25	25	Pan troglodytes	9598	65695	1	0	0	651.867	1301.72	2	1301.71	0.0123	0	78.78	3.8e-07	R	SLDLDSIIAEVK	A					NoBSA
1		K2C1_PANTR	Keratin, type II cytoskeletal 1 OS=Pan troglodytes GN=KRT1 PE=2 SV=1	14690	65588	472	472	25	25	Pan troglodytes	9598	65393	1	0	0	651.867	1301.72	2	1301.71	0.0125	0	54.74	2.2e-05	R	SLDLDSIIAEVK	A					N2_NoBSA
1		K2C1_PANTR	Keratin, type II cytoskeletal 1 OS=Pan troglodytes GN=KRT1 PE=2 SV=1	14690	65588	472	472	25	25	Pan troglodytes	9598	65698	1	0	0	651.868	1301.72	2	1301.71	0.0129	0	36.93	0.00034	R	SLDLDSIIAEVK	A					Nh3_BSA
1		K2C1_PANTR	Keratin, type II cytoskeletal 1 OS=Pan troglodytes GN=KRT1 PE=2 SV=1	14690	65588	472	472	25	25	Pan troglodytes	9598	65699	1	0	0	651.868	1301.72	2	1301.71	0.013	0	72.8	6.6e-07	R	SLDLDSIIAEVK	A					Un_BSA
1		K2C1_PANTR	Keratin, type II cytoskeletal 1 OS=Pan troglodytes GN=KRT1 PE=2 SV=1	14690	65588	472	472	25	25	Pan troglodytes	9598	72891	1	0	1	679.351	1356.69	2	1356.69	0.0001	0	68.2	1.3e-06	K	LNDLEDALQQAK	E					Nh3_NoBSA
1		K2C1_PANTR	Keratin, type II cytoskeletal 1 OS=Pan troglodytes GN=KRT1 PE=2 SV=1	14690	65588	472	472	25	25	Pan troglodytes	9598	72898	1	0	1	679.353	1356.69	2	1356.69	0.0028	0	66.5	2.7e-06	K	LNDLEDALQQAK	E					BSA
1		K2C1_PANTR	Keratin, type II cytoskeletal 1 OS=Pan troglodytes GN=KRT1 PE=2 SV=1	14690	65588	472	472	25	25	Pan troglodytes	9598	72901	1	0	1	679.353	1356.69	2	1356.69	0.0038	0	32.63	0.00087	K	LNDLEDALQQAK	E					Ar_NoBSA
1		K2C1_PANTR	Keratin, type II cytoskeletal 1 OS=Pan troglodytes GN=KRT1 PE=2 SV=1	14690	65588	472	472	25	25	Pan troglodytes	9598	72906	1	0	1	679.354	1356.69	2	1356.69	0.0047	0	53.91	1.3e-05	K	LNDLEDALQQAK	E					Nh3_BSA
1		K2C1_PANTR	Keratin, type II cytoskeletal 1 OS=Pan troglodytes GN=KRT1 PE=2 SV=1	14690	65588	472	472	25	25	Pan troglodytes	9598	72907	1	0	1	679.355	1356.69	2	1356.69	0.006	0	71.12	8.4e-07	K	LNDLEDALQQAK	E					N2_NoBSA
1		K2C1_PANTR	Keratin, type II cytoskeletal 1 OS=Pan troglodytes GN=KRT1 PE=2 SV=1	14690	65588	472	472	25	25	Pan troglodytes	9598	72915	1	0	1	679.355	1356.7	2	1356.69	0.0074	0	51.12	3.6e-05	K	LNDLEDALQQAK	E					Un_NoBSA
1		K2C1_PANTR	Keratin, type II cytoskeletal 1 OS=Pan troglodytes GN=KRT1 PE=2 SV=1	14690	65588	472	472	25	25	Pan troglodytes	9598	72920	1	0	1	679.356	1356.7	2	1356.69	0.0087	0	90.57	2.9e-08	K	LNDLEDALQQAK	E					Nh3_BSA
1		K2C1_PANTR	Keratin, type II cytoskeletal 1 OS=Pan troglodytes GN=KRT1 PE=2 SV=1	14690	65588	472	472	25	25	Pan troglodytes	9598	72921	1	0	1	679.356	1356.7	2	1356.69	0.0088	0	68.61	1.5e-06	K	LNDLEDALQQAK	E					BSA
1		K2C1_PANTR	Keratin, type II cytoskeletal 1 OS=Pan troglodytes GN=KRT1 PE=2 SV=1	14690	65588	472	472	25	25	Pan troglodytes	9598	72927	1	0	1	679.356	1356.7	2	1356.69	0.0099	0	65.73	8.2e-06	K	LNDLEDALQQAK	E					Un_BSA
1		K2C1_PANTR	Keratin, type II cytoskeletal 1 OS=Pan troglodytes GN=KRT1 PE=2 SV=1	14690	65588	472	472	25	25	Pan troglodytes	9598	72929	1	0	1	679.357	1356.7	2	1356.69	0.0108	0	45.93	0.00014	K	LNDLEDALQQAK	E					NoBSA
1		K2C1_PANTR	Keratin, type II cytoskeletal 1 OS=Pan troglodytes GN=KRT1 PE=2 SV=1	14690	65588	472	472	25	25	Pan troglodytes	9598	72931	1	0	1	679.357	1356.7	2	1356.69	0.0112	0	63.85	4.2e-06	K	LNDLEDALQQAK	E					N2_NoBSA
1		K2C1_PANTR	Keratin, type II cytoskeletal 1 OS=Pan troglodytes GN=KRT1 PE=2 SV=1	14690	65588	472	472	25	25	Pan troglodytes	9598	72933	1	0	1	679.357	1356.7	2	1356.69	0.0115	0	57.92	1.1e-05	K	LNDLEDALQQAK	E					Ar_BSA
1		K2C1_PANTR	Keratin, type II cytoskeletal 1 OS=Pan troglodytes GN=KRT1 PE=2 SV=1	14690	65588	472	472	25	25	Pan troglodytes	9598	72934	1	0	1	679.357	1356.7	2	1356.69	0.0117	0	63.03	5.7e-06	K	LNDLEDALQQAK	E					NoBSA
1		K2C1_PANTR	Keratin, type II cytoskeletal 1 OS=Pan troglodytes GN=KRT1 PE=2 SV=1	14690	65588	472	472	25	25	Pan troglodytes	9598	72936	1	0	1	679.357	1356.7	2	1356.69	0.012	0	57.29	1.3e-05	K	LNDLEDALQQAK	E					N2_BSA
1		K2C1_PANTR	Keratin, type II cytoskeletal 1 OS=Pan troglodytes GN=KRT1 PE=2 SV=1	14690	65588	472	472	25	25	Pan troglodytes	9598	73110	1	0	1	679.842	1357.67	2	1357.67	-0.0027	0	30.24	0.0015	K	LNDLEDALQQAK	E	Deamidated (NQ)	0.000000000100.0			BSA
1		K2C1_PANTR	Keratin, type II cytoskeletal 1 OS=Pan troglodytes GN=KRT1 PE=2 SV=1	14690	65588	472	472	25	25	Pan troglodytes	9598	73113	1	0	1	679.844	1357.67	2	1357.67	0.0018	0	23.39	0.0064	K	LNDLEDALQQAK	E	Deamidated (NQ)	0.000000000100.0			BSA
1		K2C1_PANTR	Keratin, type II cytoskeletal 1 OS=Pan troglodytes GN=KRT1 PE=2 SV=1	14690	65588	472	472	25	25	Pan troglodytes	9598	73114	1	0	1	679.848	1357.68	2	1357.67	0.0093	0	44.55	0.00024	K	LNDLEDALQQAK	E	Deamidated (NQ)	0.000000000100.0			Nh3_BSA
1		K2C1_PANTR	Keratin, type II cytoskeletal 1 OS=Pan troglodytes GN=KRT1 PE=2 SV=1	14690	65588	472	472	25	25	Pan troglodytes	9598	73115	1	0	1	679.848	1357.68	2	1357.67	0.0094	0	39.3	0.0014	K	LNDLEDALQQAK	E	Deamidated (NQ)	0.000000001000.0			BSA
1		K2C1_PANTR	Keratin, type II cytoskeletal 1 OS=Pan troglodytes GN=KRT1 PE=2 SV=1	14690	65588	472	472	25	25	Pan troglodytes	9598	73117	1	0	1	679.848	1357.68	2	1357.67	0.0098	0	26.17	0.009	K	LNDLEDALQQAK	E	Deamidated (NQ)	0.000000000100.0			BSA
1		K2C1_PANTR	Keratin, type II cytoskeletal 1 OS=Pan troglodytes GN=KRT1 PE=2 SV=1	14690	65588	472	472	25	25	Pan troglodytes	9598	75784	1	0	1	692.345	1382.67	2	1382.68	-0.0084	0	48.07	5.1e-05	K	SLNNQFASFIDK	V					Ar_NoBSA
1		K2C1_PANTR	Keratin, type II cytoskeletal 1 OS=Pan troglodytes GN=KRT1 PE=2 SV=1	14690	65588	472	472	25	25	Pan troglodytes	9598	75785	1	0	1	692.347	1382.68	2	1382.68	-0.0036	0	53.45	3.4e-05	K	SLNNQFASFIDK	V					N2_NoBSA
1		K2C1_PANTR	Keratin, type II cytoskeletal 1 OS=Pan troglodytes GN=KRT1 PE=2 SV=1	14690	65588	472	472	25	25	Pan troglodytes	9598	75787	1	0	1	692.348	1382.68	2	1382.68	-0.0021	0	60.28	9.6e-06	K	SLNNQFASFIDK	V					N2_BSA
1		K2C1_PANTR	Keratin, type II cytoskeletal 1 OS=Pan troglodytes GN=KRT1 PE=2 SV=1	14690	65588	472	472	25	25	Pan troglodytes	9598	75792	1	0	1	692.35	1382.68	2	1382.68	0.0016	0	62.37	1.2e-05	K	SLNNQFASFIDK	V					Ar_BSA
1		K2C1_PANTR	Keratin, type II cytoskeletal 1 OS=Pan troglodytes GN=KRT1 PE=2 SV=1	14690	65588	472	472	25	25	Pan troglodytes	9598	75794	1	0	1	692.351	1382.69	2	1382.68	0.0034	0	73.82	5.8e-07	K	SLNNQFASFIDK	V					Nh3_BSA
1		K2C1_PANTR	Keratin, type II cytoskeletal 1 OS=Pan troglodytes GN=KRT1 PE=2 SV=1	14690	65588	472	472	25	25	Pan troglodytes	9598	75795	1	0	1	692.351	1382.69	2	1382.68	0.004	0	49.57	0.00014	K	SLNNQFASFIDK	V					NoBSA
1		K2C1_PANTR	Keratin, type II cytoskeletal 1 OS=Pan troglodytes GN=KRT1 PE=2 SV=1	14690	65588	472	472	25	25	Pan troglodytes	9598	75796	1	0	1	692.351	1382.69	2	1382.68	0.004	0	99.51	4.1e-09	K	SLNNQFASFIDK	V					Ar_NoBSA
1		K2C1_PANTR	Keratin, type II cytoskeletal 1 OS=Pan troglodytes GN=KRT1 PE=2 SV=1	14690	65588	472	472	25	25	Pan troglodytes	9598	75798	1	0	1	692.351	1382.69	2	1382.68	0.0047	0	76.64	8.2e-07	K	SLNNQFASFIDK	V					N2_NoBSA
1		K2C1_PANTR	Keratin, type II cytoskeletal 1 OS=Pan troglodytes GN=KRT1 PE=2 SV=1	14690	65588	472	472	25	25	Pan troglodytes	9598	75800	1	0	1	692.351	1382.69	2	1382.68	0.0048	0	35.51	0.00047	K	SLNNQFASFIDK	V					Un_BSA
1		K2C1_PANTR	Keratin, type II cytoskeletal 1 OS=Pan troglodytes GN=KRT1 PE=2 SV=1	14690	65588	472	472	25	25	Pan troglodytes	9598	75801	1	0	1	692.352	1382.69	2	1382.68	0.006	0	37.24	0.00032	K	SLNNQFASFIDK	V					Nh3_BSA
1		K2C1_PANTR	Keratin, type II cytoskeletal 1 OS=Pan troglodytes GN=KRT1 PE=2 SV=1	14690	65588	472	472	25	25	Pan troglodytes	9598	75803	1	0	1	692.352	1382.69	2	1382.68	0.0065	0	38.13	0.00027	K	SLNNQFASFIDK	V					Nh3_NoBSA
1		K2C1_PANTR	Keratin, type II cytoskeletal 1 OS=Pan troglodytes GN=KRT1 PE=2 SV=1	14690	65588	472	472	25	25	Pan troglodytes	9598	75804	1	0	1	692.352	1382.69	2	1382.68	0.0066	0	68.21	2.4e-06	K	SLNNQFASFIDK	V					NoBSA
1		K2C1_PANTR	Keratin, type II cytoskeletal 1 OS=Pan troglodytes GN=KRT1 PE=2 SV=1	14690	65588	472	472	25	25	Pan troglodytes	9598	75806	1	0	1	692.352	1382.69	2	1382.68	0.0067	0	65.6	4.9e-06	K	SLNNQFASFIDK	V					BSA
1		K2C1_PANTR	Keratin, type II cytoskeletal 1 OS=Pan troglodytes GN=KRT1 PE=2 SV=1	14690	65588	472	472	25	25	Pan troglodytes	9598	75809	1	0	1	692.353	1382.69	2	1382.68	0.0084	0	65.34	6e-06	K	SLNNQFASFIDK	V					N2_BSA
1		K2C1_PANTR	Keratin, type II cytoskeletal 1 OS=Pan troglodytes GN=KRT1 PE=2 SV=1	14690	65588	472	472	25	25	Pan troglodytes	9598	75810	1	0	1	692.353	1382.69	2	1382.68	0.0084	0	74.19	1.5e-06	K	SLNNQFASFIDK	V					Nh3_NoBSA
1		K2C1_PANTR	Keratin, type II cytoskeletal 1 OS=Pan troglodytes GN=KRT1 PE=2 SV=1	14690	65588	472	472	25	25	Pan troglodytes	9598	75813	1	0	1	692.353	1382.69	2	1382.68	0.0088	0	93.35	1.9e-08	K	SLNNQFASFIDK	V					Ar_BSA
1		K2C1_PANTR	Keratin, type II cytoskeletal 1 OS=Pan troglodytes GN=KRT1 PE=2 SV=1	14690	65588	472	472	25	25	Pan troglodytes	9598	75815	1	0	1	692.353	1382.69	2	1382.68	0.0091	0	93.26	1.5e-08	K	SLNNQFASFIDK	V					Un_BSA
1		K2C1_PANTR	Keratin, type II cytoskeletal 1 OS=Pan troglodytes GN=KRT1 PE=2 SV=1	14690	65588	472	472	25	25	Pan troglodytes	9598	75817	1	0	1	692.353	1382.69	2	1382.68	0.0091	0	70.2	8.4e-07	K	SLNNQFASFIDK	V					Ar_NoBSA
1		K2C1_PANTR	Keratin, type II cytoskeletal 1 OS=Pan troglodytes GN=KRT1 PE=2 SV=1	14690	65588	472	472	25	25	Pan troglodytes	9598	75818	1	0	1	692.353	1382.69	2	1382.68	0.0092	0	51.4	4.9e-05	K	SLNNQFASFIDK	V					NoBSA
1		K2C1_PANTR	Keratin, type II cytoskeletal 1 OS=Pan troglodytes GN=KRT1 PE=2 SV=1	14690	65588	472	472	25	25	Pan troglodytes	9598	75822	1	0	1	692.354	1382.69	2	1382.68	0.0098	0	93.33	1.5e-08	K	SLNNQFASFIDK	V					Nh3_NoBSA
1		K2C1_PANTR	Keratin, type II cytoskeletal 1 OS=Pan troglodytes GN=KRT1 PE=2 SV=1	14690	65588	472	472	25	25	Pan troglodytes	9598	75823	1	0	1	692.354	1382.69	2	1382.68	0.01	0	93.23	1.8e-08	K	SLNNQFASFIDK	V					BSA
1		K2C1_PANTR	Keratin, type II cytoskeletal 1 OS=Pan troglodytes GN=KRT1 PE=2 SV=1	14690	65588	472	472	25	25	Pan troglodytes	9598	75824	1	0	1	692.354	1382.69	2	1382.68	0.0109	0	31.08	0.0026	K	SLNNQFASFIDK	V					NoBSA
1		K2C1_PANTR	Keratin, type II cytoskeletal 1 OS=Pan troglodytes GN=KRT1 PE=2 SV=1	14690	65588	472	472	25	25	Pan troglodytes	9598	75827	1	0	1	692.355	1382.69	2	1382.68	0.0115	0	64.29	8.1e-06	K	SLNNQFASFIDK	V					BSA
1		K2C1_PANTR	Keratin, type II cytoskeletal 1 OS=Pan troglodytes GN=KRT1 PE=2 SV=1	14690	65588	472	472	25	25	Pan troglodytes	9598	75828	1	0	1	692.355	1382.7	2	1382.68	0.0125	0	93.31	1.9e-08	K	SLNNQFASFIDK	V					Nh3_NoBSA
1		K2C1_PANTR	Keratin, type II cytoskeletal 1 OS=Pan troglodytes GN=KRT1 PE=2 SV=1	14690	65588	472	472	25	25	Pan troglodytes	9598	75937	1	0	1	692.844	1383.67	2	1383.67	0.0063	0	73.19	5.7e-07	K	SLNNQFASFIDK	V	Deamidated (NQ)	0.000010000000.0			Nh3_BSA
1		K2C1_PANTR	Keratin, type II cytoskeletal 1 OS=Pan troglodytes GN=KRT1 PE=2 SV=1	14690	65588	472	472	25	25	Pan troglodytes	9598	75938	1	0	1	692.845	1383.67	2	1383.67	0.0076	0	56.42	5.1e-06	K	SLNNQFASFIDK	V	Deamidated (NQ)	0.000100000000.0			Un_NoBSA
1		K2C1_PANTR	Keratin, type II cytoskeletal 1 OS=Pan troglodytes GN=KRT1 PE=2 SV=1	14690	65588	472	472	25	25	Pan troglodytes	9598	75939	1	0	1	692.847	1383.68	2	1383.67	0.0126	0	28.88	0.002	K	SLNNQFASFIDK	V	Deamidated (NQ)	0.000100000000.0			Un_BSA
1		K2C1_PANTR	Keratin, type II cytoskeletal 1 OS=Pan troglodytes GN=KRT1 PE=2 SV=1	14690	65588	472	472	25	25	Pan troglodytes	9598	77028	1	0	1	697.368	1392.72	2	1392.72	-0.0033	1	73.46	1e-06	R	TNAENEFVTIKK	D					Un_NoBSA
1		K2C1_PANTR	Keratin, type II cytoskeletal 1 OS=Pan troglodytes GN=KRT1 PE=2 SV=1	14690	65588	472	472	25	25	Pan troglodytes	9598	77034	1	0	1	697.369	1392.72	2	1392.72	-0.0012	1	73.99	1.6e-06	R	TNAENEFVTIKK	D					BSA
1		K2C1_PANTR	Keratin, type II cytoskeletal 1 OS=Pan troglodytes GN=KRT1 PE=2 SV=1	14690	65588	472	472	25	25	Pan troglodytes	9598	77035	1	0	1	697.372	1392.73	2	1392.72	0.0047	1	74.27	1.3e-06	R	TNAENEFVTIKK	D					Nh3_NoBSA
1		K2C1_PANTR	Keratin, type II cytoskeletal 1 OS=Pan troglodytes GN=KRT1 PE=2 SV=1	14690	65588	472	472	25	25	Pan troglodytes	9598	77038	1	0	1	697.372	1392.73	2	1392.72	0.0055	1	73.77	5.4e-07	R	TNAENEFVTIKK	D					Un_NoBSA
1		K2C1_PANTR	Keratin, type II cytoskeletal 1 OS=Pan troglodytes GN=KRT1 PE=2 SV=1	14690	65588	472	472	25	25	Pan troglodytes	9598	77039	1	0	1	697.372	1392.73	2	1392.72	0.0056	1	79.05	4.2e-07	R	TNAENEFVTIKK	D					Un_BSA
1		K2C1_PANTR	Keratin, type II cytoskeletal 1 OS=Pan troglodytes GN=KRT1 PE=2 SV=1	14690	65588	472	472	25	25	Pan troglodytes	9598	77040	1	0	1	697.373	1392.73	2	1392.72	0.0061	1	73.9	1e-06	R	TNAENEFVTIKK	D					Un_BSA
1		K2C1_PANTR	Keratin, type II cytoskeletal 1 OS=Pan troglodytes GN=KRT1 PE=2 SV=1	14690	65588	472	472	25	25	Pan troglodytes	9598	77041	1	0	1	697.373	1392.73	2	1392.72	0.0062	1	56.37	1.6e-05	R	TNAENEFVTIKK	D					Ar_NoBSA
1		K2C1_PANTR	Keratin, type II cytoskeletal 1 OS=Pan troglodytes GN=KRT1 PE=2 SV=1	14690	65588	472	472	25	25	Pan troglodytes	9598	77042	1	0	1	697.373	1392.73	2	1392.72	0.0065	1	74.29	6e-07	R	TNAENEFVTIKK	D					Ar_NoBSA
1		K2C1_PANTR	Keratin, type II cytoskeletal 1 OS=Pan troglodytes GN=KRT1 PE=2 SV=1	14690	65588	472	472	25	25	Pan troglodytes	9598	77043	1	0	1	697.373	1392.73	2	1392.72	0.0069	1	60.83	4.8e-06	R	TNAENEFVTIKK	D					Nh3_BSA
1		K2C1_PANTR	Keratin, type II cytoskeletal 1 OS=Pan troglodytes GN=KRT1 PE=2 SV=1	14690	65588	472	472	25	25	Pan troglodytes	9598	77044	1	0	1	697.373	1392.73	2	1392.72	0.0072	1	64.29	3.6e-06	R	TNAENEFVTIKK	D					NoBSA
1		K2C1_PANTR	Keratin, type II cytoskeletal 1 OS=Pan troglodytes GN=KRT1 PE=2 SV=1	14690	65588	472	472	25	25	Pan troglodytes	9598	77047	1	0	1	697.374	1392.73	2	1392.72	0.008	1	70.07	3e-06	R	TNAENEFVTIKK	D					N2_BSA
1		K2C1_PANTR	Keratin, type II cytoskeletal 1 OS=Pan troglodytes GN=KRT1 PE=2 SV=1	14690	65588	472	472	25	25	Pan troglodytes	9598	77048	1	0	1	697.374	1392.73	2	1392.72	0.0087	1	42.41	0.0014	R	TNAENEFVTIKK	D					Nh3_NoBSA
1		K2C1_PANTR	Keratin, type II cytoskeletal 1 OS=Pan troglodytes GN=KRT1 PE=2 SV=1	14690	65588	472	472	25	25	Pan troglodytes	9598	77049	1	0	1	697.374	1392.73	2	1392.72	0.0087	1	85.17	1e-07	R	TNAENEFVTIKK	D					N2_NoBSA
1		K2C1_PANTR	Keratin, type II cytoskeletal 1 OS=Pan troglodytes GN=KRT1 PE=2 SV=1	14690	65588	472	472	25	25	Pan troglodytes	9598	77050	1	0	1	697.374	1392.73	2	1392.72	0.0091	1	79.11	4.1e-07	R	TNAENEFVTIKK	D					BSA
1		K2C1_PANTR	Keratin, type II cytoskeletal 1 OS=Pan troglodytes GN=KRT1 PE=2 SV=1	14690	65588	472	472	25	25	Pan troglodytes	9598	77051	1	0	1	697.374	1392.73	2	1392.72	0.0091	1	61.12	7.1e-06	R	TNAENEFVTIKK	D					Nh3_NoBSA
1		K2C1_PANTR	Keratin, type II cytoskeletal 1 OS=Pan troglodytes GN=KRT1 PE=2 SV=1	14690	65588	472	472	25	25	Pan troglodytes	9598	77052	1	0	1	697.374	1392.73	2	1392.72	0.0092	1	66.74	2.9e-06	R	TNAENEFVTIKK	D					Nh3_BSA
1		K2C1_PANTR	Keratin, type II cytoskeletal 1 OS=Pan troglodytes GN=KRT1 PE=2 SV=1	14690	65588	472	472	25	25	Pan troglodytes	9598	77054	1	0	1	697.375	1392.73	2	1392.72	0.0095	1	99.11	2.3e-09	R	TNAENEFVTIKK	D					Ar_BSA
1		K2C1_PANTR	Keratin, type II cytoskeletal 1 OS=Pan troglodytes GN=KRT1 PE=2 SV=1	14690	65588	472	472	25	25	Pan troglodytes	9598	77057	1	0	1	697.375	1392.74	2	1392.72	0.0105	1	78.92	4.3e-07	R	TNAENEFVTIKK	D					N2_BSA
1		K2C1_PANTR	Keratin, type II cytoskeletal 1 OS=Pan troglodytes GN=KRT1 PE=2 SV=1	14690	65588	472	472	25	25	Pan troglodytes	9598	77058	1	0	1	697.375	1392.74	2	1392.72	0.0105	1	55.09	2.4e-05	R	TNAENEFVTIKK	D					NoBSA
1		K2C1_PANTR	Keratin, type II cytoskeletal 1 OS=Pan troglodytes GN=KRT1 PE=2 SV=1	14690	65588	472	472	25	25	Pan troglodytes	9598	77059	1	0	1	697.375	1392.74	2	1392.72	0.0105	1	69.46	2.4e-06	R	TNAENEFVTIKK	D					N2_BSA
1		K2C1_PANTR	Keratin, type II cytoskeletal 1 OS=Pan troglodytes GN=KRT1 PE=2 SV=1	14690	65588	472	472	25	25	Pan troglodytes	9598	77061	1	0	1	697.375	1392.74	2	1392.72	0.0109	1	66.62	7.2e-06	R	TNAENEFVTIKK	D					N2_NoBSA
1		K2C1_PANTR	Keratin, type II cytoskeletal 1 OS=Pan troglodytes GN=KRT1 PE=2 SV=1	14690	65588	472	472	25	25	Pan troglodytes	9598	77064	1	0	1	697.375	1392.74	2	1392.72	0.011	1	70.27	3.1e-06	R	TNAENEFVTIKK	D					Un_BSA
1		K2C1_PANTR	Keratin, type II cytoskeletal 1 OS=Pan troglodytes GN=KRT1 PE=2 SV=1	14690	65588	472	472	25	25	Pan troglodytes	9598	77066	1	0	1	697.376	1392.74	2	1392.72	0.012	1	70.21	2.5e-06	R	TNAENEFVTIKK	D					Nh3_BSA
1		K2C1_PANTR	Keratin, type II cytoskeletal 1 OS=Pan troglodytes GN=KRT1 PE=2 SV=1	14690	65588	472	472	25	25	Pan troglodytes	9598	77068	1	0	1	697.376	1392.74	2	1392.72	0.0132	1	73.85	1.5e-06	R	TNAENEFVTIKK	D					Ar_BSA
1		K2C1_PANTR	Keratin, type II cytoskeletal 1 OS=Pan troglodytes GN=KRT1 PE=2 SV=1	14690	65588	472	472	25	25	Pan troglodytes	9598	79854	1	0	1	711.373	1420.73	2	1420.73	-0.0003	1	47.1	9.9e-05	K	RTNAENEFVTIK	K					Un_BSA
1		K2C1_PANTR	Keratin, type II cytoskeletal 1 OS=Pan troglodytes GN=KRT1 PE=2 SV=1	14690	65588	472	472	25	25	Pan troglodytes	9598	79855	1	0	1	711.373	1420.73	2	1420.73	0.0001	1	73.33	2.1e-06	K	RTNAENEFVTIK	K					N2_NoBSA
1		K2C1_PANTR	Keratin, type II cytoskeletal 1 OS=Pan troglodytes GN=KRT1 PE=2 SV=1	14690	65588	472	472	25	25	Pan troglodytes	9598	79857	1	0	1	711.375	1420.73	2	1420.73	0.0035	1	56.99	7.9e-05	K	RTNAENEFVTIK	K					Ar_BSA
1		K2C1_PANTR	Keratin, type II cytoskeletal 1 OS=Pan troglodytes GN=KRT1 PE=2 SV=1	14690	65588	472	472	25	25	Pan troglodytes	9598	79858	1	0	1	711.375	1420.73	2	1420.73	0.0039	1	60.49	2.7e-05	K	RTNAENEFVTIK	K					N2_NoBSA
1		K2C1_PANTR	Keratin, type II cytoskeletal 1 OS=Pan troglodytes GN=KRT1 PE=2 SV=1	14690	65588	472	472	25	25	Pan troglodytes	9598	79860	1	0	1	711.375	1420.74	2	1420.73	0.0046	1	67.88	6.3e-06	K	RTNAENEFVTIK	K					Ar_NoBSA
1		K2C1_PANTR	Keratin, type II cytoskeletal 1 OS=Pan troglodytes GN=KRT1 PE=2 SV=1	14690	65588	472	472	25	25	Pan troglodytes	9598	79862	1	0	1	711.375	1420.74	2	1420.73	0.0048	1	86.94	7.9e-08	K	RTNAENEFVTIK	K					Nh3_NoBSA
1		K2C1_PANTR	Keratin, type II cytoskeletal 1 OS=Pan troglodytes GN=KRT1 PE=2 SV=1	14690	65588	472	472	25	25	Pan troglodytes	9598	79866	1	0	1	711.375	1420.74	2	1420.73	0.0055	1	67.45	6.7e-06	K	RTNAENEFVTIK	K					NoBSA
1		K2C1_PANTR	Keratin, type II cytoskeletal 1 OS=Pan troglodytes GN=KRT1 PE=2 SV=1	14690	65588	472	472	25	25	Pan troglodytes	9598	79867	1	0	1	711.376	1420.74	2	1420.73	0.0057	1	52.81	0.00015	K	RTNAENEFVTIK	K					Nh3_BSA
1		K2C1_PANTR	Keratin, type II cytoskeletal 1 OS=Pan troglodytes GN=KRT1 PE=2 SV=1	14690	65588	472	472	25	25	Pan troglodytes	9598	79868	1	0	1	711.376	1420.74	2	1420.73	0.0059	1	63.76	1.5e-05	K	RTNAENEFVTIK	K					Nh3_BSA
1		K2C1_PANTR	Keratin, type II cytoskeletal 1 OS=Pan troglodytes GN=KRT1 PE=2 SV=1	14690	65588	472	472	25	25	Pan troglodytes	9598	79869	1	0	1	711.376	1420.74	2	1420.73	0.0061	1	80.97	3.1e-07	K	RTNAENEFVTIK	K					N2_BSA
1		K2C1_PANTR	Keratin, type II cytoskeletal 1 OS=Pan troglodytes GN=KRT1 PE=2 SV=1	14690	65588	472	472	25	25	Pan troglodytes	9598	79871	1	0	1	711.376	1420.74	2	1420.73	0.0069	1	61.53	2.6e-05	K	RTNAENEFVTIK	K					Ar_NoBSA
1		K2C1_PANTR	Keratin, type II cytoskeletal 1 OS=Pan troglodytes GN=KRT1 PE=2 SV=1	14690	65588	472	472	25	25	Pan troglodytes	9598	79872	1	0	1	711.376	1420.74	2	1420.73	0.0071	1	67.86	5.9e-06	K	RTNAENEFVTIK	K					BSA
1		K2C1_PANTR	Keratin, type II cytoskeletal 1 OS=Pan troglodytes GN=KRT1 PE=2 SV=1	14690	65588	472	472	25	25	Pan troglodytes	9598	79874	1	0	1	711.376	1420.74	2	1420.73	0.0073	1	65.08	1.1e-05	K	RTNAENEFVTIK	K					Un_NoBSA
1		K2C1_PANTR	Keratin, type II cytoskeletal 1 OS=Pan troglodytes GN=KRT1 PE=2 SV=1	14690	65588	472	472	25	25	Pan troglodytes	9598	79875	1	0	1	711.376	1420.74	2	1420.73	0.0074	1	81.06	2.8e-07	K	RTNAENEFVTIK	K					Nh3_NoBSA
1		K2C1_PANTR	Keratin, type II cytoskeletal 1 OS=Pan troglodytes GN=KRT1 PE=2 SV=1	14690	65588	472	472	25	25	Pan troglodytes	9598	79876	1	0	1	711.376	1420.74	2	1420.73	0.0074	1	80.85	2.9e-07	K	RTNAENEFVTIK	K					N2_NoBSA
1		K2C1_PANTR	Keratin, type II cytoskeletal 1 OS=Pan troglodytes GN=KRT1 PE=2 SV=1	14690	65588	472	472	25	25	Pan troglodytes	9598	79877	1	0	1	711.377	1420.74	2	1420.73	0.0078	1	80.88	2.8e-07	K	RTNAENEFVTIK	K					Un_BSA
1		K2C1_PANTR	Keratin, type II cytoskeletal 1 OS=Pan troglodytes GN=KRT1 PE=2 SV=1	14690	65588	472	472	25	25	Pan troglodytes	9598	79878	1	0	1	711.377	1420.74	2	1420.73	0.0083	1	73.35	1.6e-06	K	RTNAENEFVTIK	K					BSA
1		K2C1_PANTR	Keratin, type II cytoskeletal 1 OS=Pan troglodytes GN=KRT1 PE=2 SV=1	14690	65588	472	472	25	25	Pan troglodytes	9598	79879	1	0	1	711.377	1420.74	2	1420.73	0.0084	1	65.01	1.1e-05	K	RTNAENEFVTIK	K					Un_NoBSA
1		K2C1_PANTR	Keratin, type II cytoskeletal 1 OS=Pan troglodytes GN=KRT1 PE=2 SV=1	14690	65588	472	472	25	25	Pan troglodytes	9598	79880	1	0	1	711.377	1420.74	2	1420.73	0.0084	1	67.76	5.8e-06	K	RTNAENEFVTIK	K					N2_BSA
1		K2C1_PANTR	Keratin, type II cytoskeletal 1 OS=Pan troglodytes GN=KRT1 PE=2 SV=1	14690	65588	472	472	25	25	Pan troglodytes	9598	79882	1	0	1	711.377	1420.74	2	1420.73	0.0088	1	66.41	7.9e-06	K	RTNAENEFVTIK	K					Nh3_NoBSA
1		K2C1_PANTR	Keratin, type II cytoskeletal 1 OS=Pan troglodytes GN=KRT1 PE=2 SV=1	14690	65588	472	472	25	25	Pan troglodytes	9598	79883	1	0	1	711.377	1420.74	2	1420.73	0.0091	1	80.47	3.1e-07	K	RTNAENEFVTIK	K					N2_BSA
1		K2C1_PANTR	Keratin, type II cytoskeletal 1 OS=Pan troglodytes GN=KRT1 PE=2 SV=1	14690	65588	472	472	25	25	Pan troglodytes	9598	79885	1	0	1	711.378	1420.74	2	1420.73	0.0095	1	73.44	1.6e-06	K	RTNAENEFVTIK	K					Un_BSA
1		K2C1_PANTR	Keratin, type II cytoskeletal 1 OS=Pan troglodytes GN=KRT1 PE=2 SV=1	14690	65588	472	472	25	25	Pan troglodytes	9598	79886	1	0	1	711.378	1420.74	2	1420.73	0.0101	1	67.43	6.3e-06	K	RTNAENEFVTIK	K					Ar_BSA
1		K2C1_PANTR	Keratin, type II cytoskeletal 1 OS=Pan troglodytes GN=KRT1 PE=2 SV=1	14690	65588	472	472	25	25	Pan troglodytes	9598	79888	1	0	1	711.378	1420.74	2	1420.73	0.011	1	70.17	3.6e-06	K	RTNAENEFVTIK	K					BSA
1		K2C1_PANTR	Keratin, type II cytoskeletal 1 OS=Pan troglodytes GN=KRT1 PE=2 SV=1	14690	65588	472	472	25	25	Pan troglodytes	9598	79890	1	0	1	711.379	1420.74	2	1420.73	0.012	1	67.22	7.2e-06	K	RTNAENEFVTIK	K					NoBSA
1		K2C1_PANTR	Keratin, type II cytoskeletal 1 OS=Pan troglodytes GN=KRT1 PE=2 SV=1	14690	65588	472	472	25	25	Pan troglodytes	9598	79892	1	0	1	711.379	1420.74	2	1420.73	0.0129	1	69.94	3.9e-06	K	RTNAENEFVTIK	K					Ar_NoBSA
1		K2C1_PANTR	Keratin, type II cytoskeletal 1 OS=Pan troglodytes GN=KRT1 PE=2 SV=1	14690	65588	472	472	25	25	Pan troglodytes	9598	79894	1	0	1	711.38	1420.74	2	1420.73	0.0136	1	68.6	5.3e-06	K	RTNAENEFVTIK	K					Nh3_BSA
1		K2C1_PANTR	Keratin, type II cytoskeletal 1 OS=Pan troglodytes GN=KRT1 PE=2 SV=1	14690	65588	472	472	25	25	Pan troglodytes	9598	79896	1	0	1	711.38	1420.75	2	1420.73	0.0141	1	67.91	6.1e-06	K	RTNAENEFVTIK	K					Ar_BSA
1		K2C1_PANTR	Keratin, type II cytoskeletal 1 OS=Pan troglodytes GN=KRT1 PE=2 SV=1	14690	65588	472	472	25	25	Pan troglodytes	9598	85179	1	0	1	738.374	1474.73	2	1474.74	-0.0077	0	69.25	1.2e-06	K	WELLQQVDTSTR	T					NoBSA
1		K2C1_PANTR	Keratin, type II cytoskeletal 1 OS=Pan troglodytes GN=KRT1 PE=2 SV=1	14690	65588	472	472	25	25	Pan troglodytes	9598	85180	1	0	1	738.375	1474.74	2	1474.74	-0.0062	0	51.83	3.3e-05	K	WELLQQVDTSTR	T					Ar_NoBSA
1		K2C1_PANTR	Keratin, type II cytoskeletal 1 OS=Pan troglodytes GN=KRT1 PE=2 SV=1	14690	65588	472	472	25	25	Pan troglodytes	9598	85181	1	0	1	738.375	1474.74	2	1474.74	-0.0059	0	60.4	9.7e-06	K	WELLQQVDTSTR	T					N2_BSA
1		K2C1_PANTR	Keratin, type II cytoskeletal 1 OS=Pan troglodytes GN=KRT1 PE=2 SV=1	14690	65588	472	472	25	25	Pan troglodytes	9598	85182	1	0	1	738.377	1474.74	2	1474.74	-0.0024	0	60.89	1.1e-05	K	WELLQQVDTSTR	T					NoBSA
1		K2C1_PANTR	Keratin, type II cytoskeletal 1 OS=Pan troglodytes GN=KRT1 PE=2 SV=1	14690	65588	472	472	25	25	Pan troglodytes	9598	85183	1	0	1	738.377	1474.74	2	1474.74	-0.0019	0	64.86	1.5e-06	K	WELLQQVDTSTR	T					Un_NoBSA
1		K2C1_PANTR	Keratin, type II cytoskeletal 1 OS=Pan troglodytes GN=KRT1 PE=2 SV=1	14690	65588	472	472	25	25	Pan troglodytes	9598	85184	1	0	1	738.379	1474.74	2	1474.74	0.0013	0	69.35	1.6e-06	K	WELLQQVDTSTR	T					Ar_NoBSA
1		K2C1_PANTR	Keratin, type II cytoskeletal 1 OS=Pan troglodytes GN=KRT1 PE=2 SV=1	14690	65588	472	472	25	25	Pan troglodytes	9598	85186	1	0	1	738.379	1474.74	2	1474.74	0.0014	0	68.27	9.2e-07	K	WELLQQVDTSTR	T					Un_NoBSA
1		K2C1_PANTR	Keratin, type II cytoskeletal 1 OS=Pan troglodytes GN=KRT1 PE=2 SV=1	14690	65588	472	472	25	25	Pan troglodytes	9598	85187	1	0	1	738.379	1474.74	2	1474.74	0.0015	0	47.41	0.00018	K	WELLQQVDTSTR	T					BSA
1		K2C1_PANTR	Keratin, type II cytoskeletal 1 OS=Pan troglodytes GN=KRT1 PE=2 SV=1	14690	65588	472	472	25	25	Pan troglodytes	9598	85188	1	0	1	738.379	1474.74	2	1474.74	0.0016	0	55.32	2.2e-05	K	WELLQQVDTSTR	T					N2_NoBSA
1		K2C1_PANTR	Keratin, type II cytoskeletal 1 OS=Pan troglodytes GN=KRT1 PE=2 SV=1	14690	65588	472	472	25	25	Pan troglodytes	9598	85189	1	0	1	738.38	1474.75	2	1474.74	0.0035	0	56.16	1.9e-05	K	WELLQQVDTSTR	T					BSA
1		K2C1_PANTR	Keratin, type II cytoskeletal 1 OS=Pan troglodytes GN=KRT1 PE=2 SV=1	14690	65588	472	472	25	25	Pan troglodytes	9598	85190	1	0	1	738.38	1474.75	2	1474.74	0.0038	0	26.99	0.0029	K	WELLQQVDTSTR	T					Nh3_NoBSA
1		K2C1_PANTR	Keratin, type II cytoskeletal 1 OS=Pan troglodytes GN=KRT1 PE=2 SV=1	14690	65588	472	472	25	25	Pan troglodytes	9598	85191	1	0	1	738.381	1474.75	2	1474.74	0.0053	0	41.98	0.00082	K	WELLQQVDTSTR	T					Ar_NoBSA
1		K2C1_PANTR	Keratin, type II cytoskeletal 1 OS=Pan troglodytes GN=KRT1 PE=2 SV=1	14690	65588	472	472	25	25	Pan troglodytes	9598	85192	1	0	1	738.381	1474.75	2	1474.74	0.0058	0	53.39	9.9e-06	K	WELLQQVDTSTR	T					BSA
1		K2C1_PANTR	Keratin, type II cytoskeletal 1 OS=Pan troglodytes GN=KRT1 PE=2 SV=1	14690	65588	472	472	25	25	Pan troglodytes	9598	85193	1	0	1	738.381	1474.75	2	1474.74	0.0066	0	50.82	0.0001	K	WELLQQVDTSTR	T					Ar_NoBSA
1		K2C1_PANTR	Keratin, type II cytoskeletal 1 OS=Pan troglodytes GN=KRT1 PE=2 SV=1	14690	65588	472	472	25	25	Pan troglodytes	9598	85194	1	0	1	738.382	1474.75	2	1474.74	0.0071	0	69.78	8.2e-07	K	WELLQQVDTSTR	T					Nh3_NoBSA
1		K2C1_PANTR	Keratin, type II cytoskeletal 1 OS=Pan troglodytes GN=KRT1 PE=2 SV=1	14690	65588	472	472	25	25	Pan troglodytes	9598	85195	1	0	1	738.382	1474.75	2	1474.74	0.0076	0	58.54	1.4e-05	K	WELLQQVDTSTR	T					Ar_BSA
1		K2C1_PANTR	Keratin, type II cytoskeletal 1 OS=Pan troglodytes GN=KRT1 PE=2 SV=1	14690	65588	472	472	25	25	Pan troglodytes	9598	85196	1	0	1	738.382	1474.75	2	1474.74	0.0081	0	62.92	5.9e-06	K	WELLQQVDTSTR	T					N2_NoBSA
1		K2C1_PANTR	Keratin, type II cytoskeletal 1 OS=Pan troglodytes GN=KRT1 PE=2 SV=1	14690	65588	472	472	25	25	Pan troglodytes	9598	85197	1	0	1	738.382	1474.75	2	1474.74	0.0083	0	63.8	4.2e-06	K	WELLQQVDTSTR	T					N2_BSA
1		K2C1_PANTR	Keratin, type II cytoskeletal 1 OS=Pan troglodytes GN=KRT1 PE=2 SV=1	14690	65588	472	472	25	25	Pan troglodytes	9598	85198	1	0	1	738.383	1474.75	2	1474.74	0.0102	0	60.86	9.2e-06	K	WELLQQVDTSTR	T					Un_BSA
1		K2C1_PANTR	Keratin, type II cytoskeletal 1 OS=Pan troglodytes GN=KRT1 PE=2 SV=1	14690	65588	472	472	25	25	Pan troglodytes	9598	85200	1	0	0	738.392	1474.77	2	1474.78	-0.0089	0	65.32	2.2e-06	R	FLEQQNQVLQTK	W					Nh3_NoBSA
1		K2C1_PANTR	Keratin, type II cytoskeletal 1 OS=Pan troglodytes GN=KRT1 PE=2 SV=1	14690	65588	472	472	25	25	Pan troglodytes	9598	85201	1	0	0	738.393	1474.77	2	1474.78	-0.007	0	70.54	1.2e-06	R	FLEQQNQVLQTK	W					N2_NoBSA
1		K2C1_PANTR	Keratin, type II cytoskeletal 1 OS=Pan troglodytes GN=KRT1 PE=2 SV=1	14690	65588	472	472	25	25	Pan troglodytes	9598	85202	1	0	0	738.393	1474.77	2	1474.78	-0.0068	0	72.51	6.9e-07	R	FLEQQNQVLQTK	W					NoBSA
1		K2C1_PANTR	Keratin, type II cytoskeletal 1 OS=Pan troglodytes GN=KRT1 PE=2 SV=1	14690	65588	472	472	25	25	Pan troglodytes	9598	85203	1	0	0	738.394	1474.77	2	1474.78	-0.0038	0	74.88	4.7e-07	R	FLEQQNQVLQTK	W					Nh3_NoBSA
1		K2C1_PANTR	Keratin, type II cytoskeletal 1 OS=Pan troglodytes GN=KRT1 PE=2 SV=1	14690	65588	472	472	25	25	Pan troglodytes	9598	85204	1	0	0	738.395	1474.77	2	1474.78	-0.0031	0	72.52	7.1e-07	R	FLEQQNQVLQTK	W					Ar_NoBSA
1		K2C1_PANTR	Keratin, type II cytoskeletal 1 OS=Pan troglodytes GN=KRT1 PE=2 SV=1	14690	65588	472	472	25	25	Pan troglodytes	9598	85205	1	0	0	738.395	1474.78	2	1474.78	-0.0029	0	77.23	3e-07	R	FLEQQNQVLQTK	W					NoBSA
1		K2C1_PANTR	Keratin, type II cytoskeletal 1 OS=Pan troglodytes GN=KRT1 PE=2 SV=1	14690	65588	472	472	25	25	Pan troglodytes	9598	85206	1	0	0	738.395	1474.78	2	1474.78	-0.0024	0	73.28	5.3e-07	R	FLEQQNQVLQTK	W					BSA
1		K2C1_PANTR	Keratin, type II cytoskeletal 1 OS=Pan troglodytes GN=KRT1 PE=2 SV=1	14690	65588	472	472	25	25	Pan troglodytes	9598	85208	1	0	0	738.395	1474.78	2	1474.78	-0.0015	0	72.25	6.6e-07	R	FLEQQNQVLQTK	W					BSA
1		K2C1_PANTR	Keratin, type II cytoskeletal 1 OS=Pan troglodytes GN=KRT1 PE=2 SV=1	14690	65588	472	472	25	25	Pan troglodytes	9598	85209	1	0	0	738.396	1474.78	2	1474.78	-0.0013	0	74.51	4.3e-07	R	FLEQQNQVLQTK	W					Nh3_BSA
1		K2C1_PANTR	Keratin, type II cytoskeletal 1 OS=Pan troglodytes GN=KRT1 PE=2 SV=1	14690	65588	472	472	25	25	Pan troglodytes	9598	85210	1	0	0	738.396	1474.78	2	1474.78	-0.0006	0	74.9	6e-07	R	FLEQQNQVLQTK	W					Un_BSA
1		K2C1_PANTR	Keratin, type II cytoskeletal 1 OS=Pan troglodytes GN=KRT1 PE=2 SV=1	14690	65588	472	472	25	25	Pan troglodytes	9598	85211	1	0	0	738.396	1474.78	2	1474.78	0.0004	0	71.76	6.2e-07	R	FLEQQNQVLQTK	W					BSA
1		K2C1_PANTR	Keratin, type II cytoskeletal 1 OS=Pan troglodytes GN=KRT1 PE=2 SV=1	14690	65588	472	472	25	25	Pan troglodytes	9598	85212	1	0	0	738.397	1474.78	2	1474.78	0.0006	0	72.47	7.3e-07	R	FLEQQNQVLQTK	W					Nh3_NoBSA
1		K2C1_PANTR	Keratin, type II cytoskeletal 1 OS=Pan troglodytes GN=KRT1 PE=2 SV=1	14690	65588	472	472	25	25	Pan troglodytes	9598	85213	1	0	0	738.397	1474.78	2	1474.78	0.0006	0	75.11	4.7e-07	R	FLEQQNQVLQTK	W					Un_BSA
1		K2C1_PANTR	Keratin, type II cytoskeletal 1 OS=Pan troglodytes GN=KRT1 PE=2 SV=1	14690	65588	472	472	25	25	Pan troglodytes	9598	85214	1	0	0	738.397	1474.78	2	1474.78	0.0008	0	64.71	2.7e-06	R	FLEQQNQVLQTK	W					N2_BSA
1		K2C1_PANTR	Keratin, type II cytoskeletal 1 OS=Pan troglodytes GN=KRT1 PE=2 SV=1	14690	65588	472	472	25	25	Pan troglodytes	9598	85215	1	0	0	738.397	1474.78	2	1474.78	0.0009	0	76.72	1.8e-07	R	FLEQQNQVLQTK	W					Un_BSA
1		K2C1_PANTR	Keratin, type II cytoskeletal 1 OS=Pan troglodytes GN=KRT1 PE=2 SV=1	14690	65588	472	472	25	25	Pan troglodytes	9598	85216	1	0	0	738.397	1474.78	2	1474.78	0.0012	0	65.92	2.1e-06	R	FLEQQNQVLQTK	W					Ar_BSA
1		K2C1_PANTR	Keratin, type II cytoskeletal 1 OS=Pan troglodytes GN=KRT1 PE=2 SV=1	14690	65588	472	472	25	25	Pan troglodytes	9598	85217	1	0	0	738.397	1474.78	2	1474.78	0.0015	0	69.58	9.6e-07	R	FLEQQNQVLQTK	W					N2_BSA
1		K2C1_PANTR	Keratin, type II cytoskeletal 1 OS=Pan troglodytes GN=KRT1 PE=2 SV=1	14690	65588	472	472	25	25	Pan troglodytes	9598	85218	1	0	0	738.397	1474.78	2	1474.78	0.0022	0	71.67	8.2e-07	R	FLEQQNQVLQTK	W					Un_BSA
1		K2C1_PANTR	Keratin, type II cytoskeletal 1 OS=Pan troglodytes GN=KRT1 PE=2 SV=1	14690	65588	472	472	25	25	Pan troglodytes	9598	85219	1	0	0	738.398	1474.78	2	1474.78	0.0039	0	51.72	8.3e-05	R	FLEQQNQVLQTK	W					Un_NoBSA
1		K2C1_PANTR	Keratin, type II cytoskeletal 1 OS=Pan troglodytes GN=KRT1 PE=2 SV=1	14690	65588	472	472	25	25	Pan troglodytes	9598	85220	1	0	0	738.398	1474.78	2	1474.78	0.0039	0	69.95	1.1e-06	R	FLEQQNQVLQTK	W					BSA
1		K2C1_PANTR	Keratin, type II cytoskeletal 1 OS=Pan troglodytes GN=KRT1 PE=2 SV=1	14690	65588	472	472	25	25	Pan troglodytes	9598	85221	1	0	0	738.398	1474.78	2	1474.78	0.004	0	60.84	2.6e-05	R	FLEQQNQVLQTK	W					Un_NoBSA
1		K2C1_PANTR	Keratin, type II cytoskeletal 1 OS=Pan troglodytes GN=KRT1 PE=2 SV=1	14690	65588	472	472	25	25	Pan troglodytes	9598	85222	1	0	0	738.398	1474.78	2	1474.78	0.0043	0	74.96	4.2e-07	R	FLEQQNQVLQTK	W					N2_NoBSA
1		K2C1_PANTR	Keratin, type II cytoskeletal 1 OS=Pan troglodytes GN=KRT1 PE=2 SV=1	14690	65588	472	472	25	25	Pan troglodytes	9598	85223	1	0	0	738.399	1474.78	2	1474.78	0.0044	0	51.32	8.2e-05	R	FLEQQNQVLQTK	W					Un_NoBSA
1		K2C1_PANTR	Keratin, type II cytoskeletal 1 OS=Pan troglodytes GN=KRT1 PE=2 SV=1	14690	65588	472	472	25	25	Pan troglodytes	9598	85224	1	0	0	738.399	1474.78	2	1474.78	0.0045	0	71.79	8.5e-07	R	FLEQQNQVLQTK	W					N2_NoBSA
1		K2C1_PANTR	Keratin, type II cytoskeletal 1 OS=Pan troglodytes GN=KRT1 PE=2 SV=1	14690	65588	472	472	25	25	Pan troglodytes	9598	85225	1	0	0	738.399	1474.78	2	1474.78	0.0046	0	72.52	9.5e-07	R	FLEQQNQVLQTK	W					Ar_NoBSA
1		K2C1_PANTR	Keratin, type II cytoskeletal 1 OS=Pan troglodytes GN=KRT1 PE=2 SV=1	14690	65588	472	472	25	25	Pan troglodytes	9598	85226	1	0	0	738.399	1474.78	2	1474.78	0.0047	0	72.21	8.2e-07	R	FLEQQNQVLQTK	W					Nh3_BSA
1		K2C1_PANTR	Keratin, type II cytoskeletal 1 OS=Pan troglodytes GN=KRT1 PE=2 SV=1	14690	65588	472	472	25	25	Pan troglodytes	9598	85227	1	0	0	738.399	1474.78	2	1474.78	0.0051	0	68.74	7.7e-07	R	FLEQQNQVLQTK	W					Ar_NoBSA
1		K2C1_PANTR	Keratin, type II cytoskeletal 1 OS=Pan troglodytes GN=KRT1 PE=2 SV=1	14690	65588	472	472	25	25	Pan troglodytes	9598	85229	1	0	0	738.399	1474.78	2	1474.78	0.0053	0	72.73	7.5e-07	R	FLEQQNQVLQTK	W					Ar_BSA
1		K2C1_PANTR	Keratin, type II cytoskeletal 1 OS=Pan troglodytes GN=KRT1 PE=2 SV=1	14690	65588	472	472	25	25	Pan troglodytes	9598	85230	1	0	0	738.399	1474.78	2	1474.78	0.0053	0	77.3	2.7e-07	R	FLEQQNQVLQTK	W					N2_BSA
1		K2C1_PANTR	Keratin, type II cytoskeletal 1 OS=Pan troglodytes GN=KRT1 PE=2 SV=1	14690	65588	472	472	25	25	Pan troglodytes	9598	85231	1	0	0	738.4	1474.79	2	1474.78	0.0078	0	81.07	5.1e-08	R	FLEQQNQVLQTK	W					Un_NoBSA
1		K2C1_PANTR	Keratin, type II cytoskeletal 1 OS=Pan troglodytes GN=KRT1 PE=2 SV=1	14690	65588	472	472	25	25	Pan troglodytes	9598	85232	1	0	0	738.401	1474.79	2	1474.78	0.0099	0	72.51	3.7e-07	R	FLEQQNQVLQTK	W					Ar_BSA
1		K2C1_PANTR	Keratin, type II cytoskeletal 1 OS=Pan troglodytes GN=KRT1 PE=2 SV=1	14690	65588	472	472	25	25	Pan troglodytes	9598	85233	1	0	0	738.402	1474.79	2	1474.78	0.0104	0	65.9	8.3e-06	R	FLEQQNQVLQTK	W					BSA
1		K2C1_PANTR	Keratin, type II cytoskeletal 1 OS=Pan troglodytes GN=KRT1 PE=2 SV=1	14690	65588	472	472	25	25	Pan troglodytes	9598	85234	1	0	0	738.402	1474.79	2	1474.78	0.011	0	76.62	4.3e-07	R	FLEQQNQVLQTK	W					Nh3_BSA
1		K2C1_PANTR	Keratin, type II cytoskeletal 1 OS=Pan troglodytes GN=KRT1 PE=2 SV=1	14690	65588	472	472	25	25	Pan troglodytes	9598	85303	1	0	0	738.884	1475.75	2	1475.76	-0.0085	0	40.08	0.00017	R	FLEQQNQVLQTK	W	Deamidated (NQ)	0.000010000000.0			Nh3_BSA
1		K2C1_PANTR	Keratin, type II cytoskeletal 1 OS=Pan troglodytes GN=KRT1 PE=2 SV=1	14690	65588	472	472	25	25	Pan troglodytes	9598	85304	1	0	0	738.884	1475.75	2	1475.76	-0.0077	0	52.34	5.3e-05	R	FLEQQNQVLQTK	W	Deamidated (NQ)	0.000100000000.0			Ar_NoBSA
1		K2C1_PANTR	Keratin, type II cytoskeletal 1 OS=Pan troglodytes GN=KRT1 PE=2 SV=1	14690	65588	472	472	25	25	Pan troglodytes	9598	85307	1	0	0	738.885	1475.75	2	1475.76	-0.0071	0	53.38	4.1e-05	R	FLEQQNQVLQTK	W	Deamidated (NQ)	0.000100000000.0			Nh3_NoBSA
1		K2C1_PANTR	Keratin, type II cytoskeletal 1 OS=Pan troglodytes GN=KRT1 PE=2 SV=1	14690	65588	472	472	25	25	Pan troglodytes	9598	85308	1	0	0	738.886	1475.76	2	1475.76	-0.0045	0	71.37	3.4e-06	R	FLEQQNQVLQTK	W	Deamidated (NQ)	0.000000100000.0			Nh3_BSA
1		K2C1_PANTR	Keratin, type II cytoskeletal 1 OS=Pan troglodytes GN=KRT1 PE=2 SV=1	14690	65588	472	472	25	25	Pan troglodytes	9598	123782	1	0	0	738.887	1475.76	2	1475.76	-0.0034	0	33.41	0.0016	R	FLEQQNQVLQTK	W	Deamidated (NQ)	0.000000000100.0			N2_NoBSA
1		K2C1_PANTR	Keratin, type II cytoskeletal 1 OS=Pan troglodytes GN=KRT1 PE=2 SV=1	14690	65588	472	472	25	25	Pan troglodytes	9598	85310	1	0	0	738.887	1475.76	2	1475.76	-0.0027	0	62.68	1.6e-05	R	FLEQQNQVLQTK	W	Deamidated (NQ)	0.000010000000.0			Ar_BSA
1		K2C1_PANTR	Keratin, type II cytoskeletal 1 OS=Pan troglodytes GN=KRT1 PE=2 SV=1	14690	65588	472	472	25	25	Pan troglodytes	9598	85311	1	0	0	738.887	1475.76	2	1475.76	-0.0021	0	50.19	0.00038	R	FLEQQNQVLQTK	W	Deamidated (NQ)	0.000010000000.0			BSA
1		K2C1_PANTR	Keratin, type II cytoskeletal 1 OS=Pan troglodytes GN=KRT1 PE=2 SV=1	14690	65588	472	472	25	25	Pan troglodytes	9598	85312	1	0	0	738.888	1475.76	2	1475.76	-0.0016	0	67.75	6.9e-06	R	FLEQQNQVLQTK	W	Deamidated (NQ)	0.000100000000.0			Un_NoBSA
1		K2C1_PANTR	Keratin, type II cytoskeletal 1 OS=Pan troglodytes GN=KRT1 PE=2 SV=1	14690	65588	472	472	25	25	Pan troglodytes	9598	85315	1	0	0	738.888	1475.76	2	1475.76	-0.0008	0	36.09	0.0014	R	FLEQQNQVLQTK	W	Deamidated (NQ)	0.000010000000.0			BSA
1		K2C1_PANTR	Keratin, type II cytoskeletal 1 OS=Pan troglodytes GN=KRT1 PE=2 SV=1	14690	65588	472	472	25	25	Pan troglodytes	9598	123708	1	0	0	738.889	1475.76	2	1475.76	0.0005	0	50.7	0.00025	R	FLEQQNQVLQTK	W	Deamidated (NQ)	0.000100000000.0			Un_NoBSA
1		K2C1_PANTR	Keratin, type II cytoskeletal 1 OS=Pan troglodytes GN=KRT1 PE=2 SV=1	14690	65588	472	472	25	25	Pan troglodytes	9598	123705	1	0	0	738.889	1475.76	2	1475.76	0.0014	0	44.96	0.00017	R	FLEQQNQVLQTK	W	Deamidated (NQ)	0.000000000100.0			N2_NoBSA
1		K2C1_PANTR	Keratin, type II cytoskeletal 1 OS=Pan troglodytes GN=KRT1 PE=2 SV=1	14690	65588	472	472	25	25	Pan troglodytes	9598	85316	1	0	0	738.889	1475.76	2	1475.76	0.0015	0	56.63	4.7e-05	R	FLEQQNQVLQTK	W	Deamidated (NQ)	0.000010000000.0			BSA
1		K2C1_PANTR	Keratin, type II cytoskeletal 1 OS=Pan troglodytes GN=KRT1 PE=2 SV=1	14690	65588	472	472	25	25	Pan troglodytes	9598	85317	1	0	0	738.889	1475.76	2	1475.76	0.0019	0	47.29	0.00012	R	FLEQQNQVLQTK	W	Deamidated (NQ)	0.000100000000.0			N2_NoBSA
1		K2C1_PANTR	Keratin, type II cytoskeletal 1 OS=Pan troglodytes GN=KRT1 PE=2 SV=1	14690	65588	472	472	25	25	Pan troglodytes	9598	85318	1	0	0	738.894	1475.77	2	1475.76	0.0105	0	28.12	0.0026	R	FLEQQNQVLQTK	W	Deamidated (NQ)	0.000010000000.0			N2_NoBSA
1		K2C1_PANTR	Keratin, type II cytoskeletal 1 OS=Pan troglodytes GN=KRT1 PE=2 SV=1	14690	65588	472	472	25	25	Pan troglodytes	9598	123773	1	0	0	738.894	1475.77	2	1475.76	0.011	0	38.7	0.0031	R	FLEQQNQVLQTK	W	Deamidated (NQ)	0.000010000000.0			Nh3_BSA
1		K2C1_PANTR	Keratin, type II cytoskeletal 1 OS=Pan troglodytes GN=KRT1 PE=2 SV=1	14690	65588	472	472	25	25	Pan troglodytes	9598	85320	1	0	0	738.895	1475.78	2	1475.76	0.0146	0	37.04	0.00063	R	FLEQQNQVLQTK	W	Deamidated (NQ)	0.000010000000.0			Un_BSA
1		K2C1_PANTR	Keratin, type II cytoskeletal 1 OS=Pan troglodytes GN=KRT1 PE=2 SV=1	14690	65588	472	472	25	25	Pan troglodytes	9598	88935	1	0	0	762.399	1522.78	2	1522.78	0.003	1	21.89	0.0088	R	LLRDYQELMNTK	L					Un_NoBSA
1		K2C1_PANTR	Keratin, type II cytoskeletal 1 OS=Pan troglodytes GN=KRT1 PE=2 SV=1	14690	65588	472	472	25	25	Pan troglodytes	9598	90147	1	0	0	770.393	1538.77	2	1538.78	-0.0046	1	41.69	0.00026	R	LLRDYQELMNTK	L	Oxidation (M)	0.000000002000.0			Ar_BSA
1		K2C1_PANTR	Keratin, type II cytoskeletal 1 OS=Pan troglodytes GN=KRT1 PE=2 SV=1	14690	65588	472	472	25	25	Pan troglodytes	9598	90148	1	0	0	770.394	1538.77	2	1538.78	-0.0027	1	29.6	0.0017	R	LLRDYQELMNTK	L	Oxidation (M)	0.000000002000.0			Ar_BSA
1		K2C1_PANTR	Keratin, type II cytoskeletal 1 OS=Pan troglodytes GN=KRT1 PE=2 SV=1	14690	65588	472	472	25	25	Pan troglodytes	9598	90151	1	0	0	770.394	1538.77	2	1538.78	-0.0024	1	42.14	0.00016	R	LLRDYQELMNTK	L	Oxidation (M)	0.000000002000.0			BSA
1		K2C1_PANTR	Keratin, type II cytoskeletal 1 OS=Pan troglodytes GN=KRT1 PE=2 SV=1	14690	65588	472	472	25	25	Pan troglodytes	9598	90155	1	0	0	770.394	1538.77	2	1538.78	-0.0019	1	38.47	0.0011	R	LLRDYQELMNTK	L	Oxidation (M)	0.000000002000.0			N2_BSA
1		K2C1_PANTR	Keratin, type II cytoskeletal 1 OS=Pan troglodytes GN=KRT1 PE=2 SV=1	14690	65588	472	472	25	25	Pan troglodytes	9598	90156	1	0	0	770.395	1538.78	2	1538.78	-0.0013	1	42.96	0.00012	R	LLRDYQELMNTK	L	Oxidation (M)	0.000000002000.0			Un_NoBSA
1		K2C1_PANTR	Keratin, type II cytoskeletal 1 OS=Pan troglodytes GN=KRT1 PE=2 SV=1	14690	65588	472	472	25	25	Pan troglodytes	9598	90157	1	0	0	770.395	1538.78	2	1538.78	-0.001	1	49.51	5.4e-05	R	LLRDYQELMNTK	L	Oxidation (M)	0.000000002000.0			N2_NoBSA
1		K2C1_PANTR	Keratin, type II cytoskeletal 1 OS=Pan troglodytes GN=KRT1 PE=2 SV=1	14690	65588	472	472	25	25	Pan troglodytes	9598	90158	1	0	0	770.395	1538.78	2	1538.78	-0.0007	1	44.74	0.00023	R	LLRDYQELMNTK	L	Oxidation (M)	0.000000002000.0			Nh3_NoBSA
1		K2C1_PANTR	Keratin, type II cytoskeletal 1 OS=Pan troglodytes GN=KRT1 PE=2 SV=1	14690	65588	472	472	25	25	Pan troglodytes	9598	90161	1	0	0	770.395	1538.78	2	1538.78	0	1	54.31	1.6e-05	R	LLRDYQELMNTK	L	Oxidation (M)	0.000000002000.0			Un_NoBSA
1		K2C1_PANTR	Keratin, type II cytoskeletal 1 OS=Pan troglodytes GN=KRT1 PE=2 SV=1	14690	65588	472	472	25	25	Pan troglodytes	9598	90162	1	0	0	770.396	1538.78	2	1538.78	0.001	1	48.96	0.00012	R	LLRDYQELMNTK	L	Oxidation (M)	0.000000002000.0			NoBSA
1		K2C1_PANTR	Keratin, type II cytoskeletal 1 OS=Pan troglodytes GN=KRT1 PE=2 SV=1	14690	65588	472	472	25	25	Pan troglodytes	9598	90165	1	0	0	770.396	1538.78	2	1538.78	0.0015	1	53.17	1.9e-05	R	LLRDYQELMNTK	L	Oxidation (M)	0.000000002000.0			N2_NoBSA
1		K2C1_PANTR	Keratin, type II cytoskeletal 1 OS=Pan troglodytes GN=KRT1 PE=2 SV=1	14690	65588	472	472	25	25	Pan troglodytes	9598	90166	1	0	0	770.396	1538.78	2	1538.78	0.0015	1	38.43	0.00036	R	LLRDYQELMNTK	L	Oxidation (M)	0.000000002000.0			N2_BSA
1		K2C1_PANTR	Keratin, type II cytoskeletal 1 OS=Pan troglodytes GN=KRT1 PE=2 SV=1	14690	65588	472	472	25	25	Pan troglodytes	9598	90171	1	0	0	770.396	1538.78	2	1538.78	0.002	1	34.12	0.00099	R	LLRDYQELMNTK	L	Oxidation (M)	0.000000002000.0			Nh3_NoBSA
1		K2C1_PANTR	Keratin, type II cytoskeletal 1 OS=Pan troglodytes GN=KRT1 PE=2 SV=1	14690	65588	472	472	25	25	Pan troglodytes	9598	90172	1	0	0	770.396	1538.78	2	1538.78	0.0021	1	42.18	0.00043	R	LLRDYQELMNTK	L	Oxidation (M)	0.000000002000.0			BSA
1		K2C1_PANTR	Keratin, type II cytoskeletal 1 OS=Pan troglodytes GN=KRT1 PE=2 SV=1	14690	65588	472	472	25	25	Pan troglodytes	9598	90173	1	0	0	770.397	1538.78	2	1538.78	0.0024	1	42.85	0.00059	R	LLRDYQELMNTK	L	Oxidation (M)	0.000000002000.0			BSA
1		K2C1_PANTR	Keratin, type II cytoskeletal 1 OS=Pan troglodytes GN=KRT1 PE=2 SV=1	14690	65588	472	472	25	25	Pan troglodytes	9598	90176	1	0	0	770.397	1538.78	2	1538.78	0.0029	1	62.35	5.8e-06	R	LLRDYQELMNTK	L	Oxidation (M)	0.000000002000.0			Ar_BSA
1		K2C1_PANTR	Keratin, type II cytoskeletal 1 OS=Pan troglodytes GN=KRT1 PE=2 SV=1	14690	65588	472	472	25	25	Pan troglodytes	9598	90177	1	0	0	770.397	1538.78	2	1538.78	0.003	1	51.05	3.4e-05	R	LLRDYQELMNTK	L	Oxidation (M)	0.000000002000.0			Un_BSA
1		K2C1_PANTR	Keratin, type II cytoskeletal 1 OS=Pan troglodytes GN=KRT1 PE=2 SV=1	14690	65588	472	472	25	25	Pan troglodytes	9598	90178	1	0	0	770.397	1538.78	2	1538.78	0.0033	1	52.76	4.4e-05	R	LLRDYQELMNTK	L	Oxidation (M)	0.000000002000.0			Nh3_NoBSA
1		K2C1_PANTR	Keratin, type II cytoskeletal 1 OS=Pan troglodytes GN=KRT1 PE=2 SV=1	14690	65588	472	472	25	25	Pan troglodytes	9598	90179	1	0	0	770.397	1538.78	2	1538.78	0.0037	1	53.47	2.4e-05	R	LLRDYQELMNTK	L	Oxidation (M)	0.000000002000.0			Ar_NoBSA
1		K2C1_PANTR	Keratin, type II cytoskeletal 1 OS=Pan troglodytes GN=KRT1 PE=2 SV=1	14690	65588	472	472	25	25	Pan troglodytes	9598	90180	1	0	0	770.397	1538.78	2	1538.78	0.0039	1	38.93	0.00034	R	LLRDYQELMNTK	L	Oxidation (M)	0.000000002000.0			Un_NoBSA
1		K2C1_PANTR	Keratin, type II cytoskeletal 1 OS=Pan troglodytes GN=KRT1 PE=2 SV=1	14690	65588	472	472	25	25	Pan troglodytes	9598	90185	1	0	0	770.398	1538.78	2	1538.78	0.005	1	42.72	0.00023	R	LLRDYQELMNTK	L	Oxidation (M)	0.000000002000.0			Nh3_BSA
1		K2C1_PANTR	Keratin, type II cytoskeletal 1 OS=Pan troglodytes GN=KRT1 PE=2 SV=1	14690	65588	472	472	25	25	Pan troglodytes	9598	90186	1	0	0	770.398	1538.78	2	1538.78	0.005	1	31.39	0.0048	R	LLRDYQELMNTK	L	Oxidation (M)	0.000000002000.0			NoBSA
1		K2C1_PANTR	Keratin, type II cytoskeletal 1 OS=Pan troglodytes GN=KRT1 PE=2 SV=1	14690	65588	472	472	25	25	Pan troglodytes	9598	90187	1	0	0	770.398	1538.78	2	1538.78	0.0058	1	40.65	0.00021	R	LLRDYQELMNTK	L	Oxidation (M)	0.000000002000.0			Un_BSA
1		K2C1_PANTR	Keratin, type II cytoskeletal 1 OS=Pan troglodytes GN=KRT1 PE=2 SV=1	14690	65588	472	472	25	25	Pan troglodytes	9598	90190	1	0	0	770.399	1538.78	2	1538.78	0.0078	1	41.19	0.00055	R	LLRDYQELMNTK	L	Oxidation (M)	0.000000002000.0			Ar_NoBSA
1		K2C1_PANTR	Keratin, type II cytoskeletal 1 OS=Pan troglodytes GN=KRT1 PE=2 SV=1	14690	65588	472	472	25	25	Pan troglodytes	9598	90191	1	0	0	770.399	1538.78	2	1538.78	0.0078	1	44.95	0.0011	R	LLRDYQELMNTK	L	Oxidation (M)	0.000000002000.0			Ar_BSA
1		K2C1_PANTR	Keratin, type II cytoskeletal 1 OS=Pan troglodytes GN=KRT1 PE=2 SV=1	14690	65588	472	472	25	25	Pan troglodytes	9598	90197	1	0	0	770.4	1538.79	2	1538.78	0.0092	1	50.51	2.1e-05	R	LLRDYQELMNTK	L	Oxidation (M)	0.000000002000.0			BSA
1		K2C1_PANTR	Keratin, type II cytoskeletal 1 OS=Pan troglodytes GN=KRT1 PE=2 SV=1	14690	65588	472	472	25	25	Pan troglodytes	9598	90199	1	0	0	770.401	1538.79	2	1538.78	0.011	1	32.99	0.0064	R	LLRDYQELMNTK	L	Oxidation (M)	0.000000002000.0			Nh3_BSA
1		K2C1_PANTR	Keratin, type II cytoskeletal 1 OS=Pan troglodytes GN=KRT1 PE=2 SV=1	14690	65588	472	472	25	25	Pan troglodytes	9598	90200	1	0	0	770.401	1538.79	2	1538.78	0.0113	1	43.57	0.00036	R	LLRDYQELMNTK	L	Oxidation (M)	0.000000002000.0			N2_NoBSA
1		K2C1_PANTR	Keratin, type II cytoskeletal 1 OS=Pan troglodytes GN=KRT1 PE=2 SV=1	14690	65588	472	472	25	25	Pan troglodytes	9598	95670	1	0	1	800.413	1598.81	2	1598.83	-0.0158	1	65.21	7.7e-07	K	NKLNDLEDALQQAK	E					BSA
1		K2C1_PANTR	Keratin, type II cytoskeletal 1 OS=Pan troglodytes GN=KRT1 PE=2 SV=1	14690	65588	472	472	25	25	Pan troglodytes	9598	95671	1	0	1	800.413	1598.81	2	1598.83	-0.0153	1	38.36	0.00025	K	NKLNDLEDALQQAK	E					Un_BSA
1		K2C1_PANTR	Keratin, type II cytoskeletal 1 OS=Pan troglodytes GN=KRT1 PE=2 SV=1	14690	65588	472	472	25	25	Pan troglodytes	9598	95672	1	0	1	800.413	1598.81	2	1598.83	-0.0147	1	56.59	1.2e-05	K	NKLNDLEDALQQAK	E					NoBSA
1		K2C1_PANTR	Keratin, type II cytoskeletal 1 OS=Pan troglodytes GN=KRT1 PE=2 SV=1	14690	65588	472	472	25	25	Pan troglodytes	9598	95673	1	0	1	800.413	1598.81	2	1598.83	-0.0141	1	67.98	4.2e-07	K	NKLNDLEDALQQAK	E					Un_NoBSA
1		K2C1_PANTR	Keratin, type II cytoskeletal 1 OS=Pan troglodytes GN=KRT1 PE=2 SV=1	14690	65588	472	472	25	25	Pan troglodytes	9598	95674	1	0	1	800.414	1598.81	2	1598.83	-0.0133	1	70.46	7e-07	K	NKLNDLEDALQQAK	E					BSA
1		K2C1_PANTR	Keratin, type II cytoskeletal 1 OS=Pan troglodytes GN=KRT1 PE=2 SV=1	14690	65588	472	472	25	25	Pan troglodytes	9598	95675	1	0	1	800.414	1598.81	2	1598.83	-0.0127	1	54.94	8.8e-06	K	NKLNDLEDALQQAK	E					Nh3_NoBSA
1		K2C1_PANTR	Keratin, type II cytoskeletal 1 OS=Pan troglodytes GN=KRT1 PE=2 SV=1	14690	65588	472	472	25	25	Pan troglodytes	9598	95676	1	0	1	800.415	1598.82	2	1598.83	-0.0109	1	24.29	0.0064	K	NKLNDLEDALQQAK	E					NoBSA
1		K2C1_PANTR	Keratin, type II cytoskeletal 1 OS=Pan troglodytes GN=KRT1 PE=2 SV=1	14690	65588	472	472	25	25	Pan troglodytes	9598	95677	1	0	1	800.416	1598.82	2	1598.83	-0.0089	1	50.14	2e-05	K	NKLNDLEDALQQAK	E					N2_BSA
1		K2C1_PANTR	Keratin, type II cytoskeletal 1 OS=Pan troglodytes GN=KRT1 PE=2 SV=1	14690	65588	472	472	25	25	Pan troglodytes	9598	95678	1	0	1	800.417	1598.82	2	1598.83	-0.0073	1	72.86	9.1e-07	K	NKLNDLEDALQQAK	E					Ar_NoBSA
1		K2C1_PANTR	Keratin, type II cytoskeletal 1 OS=Pan troglodytes GN=KRT1 PE=2 SV=1	14690	65588	472	472	25	25	Pan troglodytes	9598	95679	1	0	1	800.417	1598.82	2	1598.83	-0.0066	1	39.47	0.0002	K	NKLNDLEDALQQAK	E					Nh3_BSA
1		K2C1_PANTR	Keratin, type II cytoskeletal 1 OS=Pan troglodytes GN=KRT1 PE=2 SV=1	14690	65588	472	472	25	25	Pan troglodytes	9598	95680	1	0	1	800.417	1598.82	2	1598.83	-0.0065	1	62.36	1.6e-05	K	NKLNDLEDALQQAK	E					N2_BSA
1		K2C1_PANTR	Keratin, type II cytoskeletal 1 OS=Pan troglodytes GN=KRT1 PE=2 SV=1	14690	65588	472	472	25	25	Pan troglodytes	9598	95681	1	0	1	800.417	1598.82	2	1598.83	-0.0062	1	54.31	1.7e-05	K	NKLNDLEDALQQAK	E					Un_NoBSA
1		K2C1_PANTR	Keratin, type II cytoskeletal 1 OS=Pan troglodytes GN=KRT1 PE=2 SV=1	14690	65588	472	472	25	25	Pan troglodytes	9598	95682	1	0	1	800.418	1598.82	2	1598.83	-0.0053	1	35.77	0.00044	K	NKLNDLEDALQQAK	E					Ar_BSA
1		K2C1_PANTR	Keratin, type II cytoskeletal 1 OS=Pan troglodytes GN=KRT1 PE=2 SV=1	14690	65588	472	472	25	25	Pan troglodytes	9598	95683	1	0	1	800.418	1598.82	2	1598.83	-0.0049	1	54.95	0.00011	K	NKLNDLEDALQQAK	E					Ar_BSA
1		K2C1_PANTR	Keratin, type II cytoskeletal 1 OS=Pan troglodytes GN=KRT1 PE=2 SV=1	14690	65588	472	472	25	25	Pan troglodytes	9598	95685	1	0	1	800.418	1598.82	2	1598.83	-0.0045	1	76.49	6.9e-07	K	NKLNDLEDALQQAK	E					Nh3_NoBSA
1		K2C1_PANTR	Keratin, type II cytoskeletal 1 OS=Pan troglodytes GN=KRT1 PE=2 SV=1	14690	65588	472	472	25	25	Pan troglodytes	9598	95686	1	0	1	800.419	1598.82	2	1598.83	-0.0029	1	70.65	1.9e-06	K	NKLNDLEDALQQAK	E					BSA
1		K2C1_PANTR	Keratin, type II cytoskeletal 1 OS=Pan troglodytes GN=KRT1 PE=2 SV=1	14690	65588	472	472	25	25	Pan troglodytes	9598	95688	1	0	1	800.423	1598.83	2	1598.83	0.0042	1	54.72	2.7e-05	K	NKLNDLEDALQQAK	E					Un_BSA
1		K2C1_PANTR	Keratin, type II cytoskeletal 1 OS=Pan troglodytes GN=KRT1 PE=2 SV=1	14690	65588	472	472	25	25	Pan troglodytes	9598	99213	1	0	1	819.926	1637.84	2	1637.85	-0.0157	1	61.21	1.9e-05	K	SLNNQFASFIDKVR	F					Un_NoBSA
1		K2C1_PANTR	Keratin, type II cytoskeletal 1 OS=Pan troglodytes GN=KRT1 PE=2 SV=1	14690	65588	472	472	25	25	Pan troglodytes	9598	99214	1	0	1	819.926	1637.84	2	1637.85	-0.0156	1	59.43	6.1e-06	K	SLNNQFASFIDKVR	F					N2_NoBSA
1		K2C1_PANTR	Keratin, type II cytoskeletal 1 OS=Pan troglodytes GN=KRT1 PE=2 SV=1	14690	65588	472	472	25	25	Pan troglodytes	9598	99215	1	0	1	819.926	1637.84	2	1637.85	-0.0152	1	85.09	1.1e-07	K	SLNNQFASFIDKVR	F					BSA
1		K2C1_PANTR	Keratin, type II cytoskeletal 1 OS=Pan troglodytes GN=KRT1 PE=2 SV=1	14690	65588	472	472	25	25	Pan troglodytes	9598	99216	1	0	1	819.926	1637.84	2	1637.85	-0.0145	1	55.72	2.2e-05	K	SLNNQFASFIDKVR	F					Un_BSA
1		K2C1_PANTR	Keratin, type II cytoskeletal 1 OS=Pan troglodytes GN=KRT1 PE=2 SV=1	14690	65588	472	472	25	25	Pan troglodytes	9598	99217	1	0	1	819.927	1637.84	2	1637.85	-0.014	1	65.71	9.9e-06	K	SLNNQFASFIDKVR	F					Nh3_BSA
1		K2C1_PANTR	Keratin, type II cytoskeletal 1 OS=Pan troglodytes GN=KRT1 PE=2 SV=1	14690	65588	472	472	25	25	Pan troglodytes	9598	99218	1	0	1	819.927	1637.84	2	1637.85	-0.0127	1	67.89	3.9e-06	K	SLNNQFASFIDKVR	F					Nh3_NoBSA
1		K2C1_PANTR	Keratin, type II cytoskeletal 1 OS=Pan troglodytes GN=KRT1 PE=2 SV=1	14690	65588	472	472	25	25	Pan troglodytes	9598	99219	1	0	1	819.928	1637.84	2	1637.85	-0.0121	1	52.69	2.7e-05	K	SLNNQFASFIDKVR	F					Ar_NoBSA
1		K2C1_PANTR	Keratin, type II cytoskeletal 1 OS=Pan troglodytes GN=KRT1 PE=2 SV=1	14690	65588	472	472	25	25	Pan troglodytes	9598	99220	1	0	1	819.928	1637.84	2	1637.85	-0.0119	1	56.89	4.6e-06	K	SLNNQFASFIDKVR	F					Un_BSA
1		K2C1_PANTR	Keratin, type II cytoskeletal 1 OS=Pan troglodytes GN=KRT1 PE=2 SV=1	14690	65588	472	472	25	25	Pan troglodytes	9598	99223	1	0	1	819.928	1637.84	2	1637.85	-0.01	1	69.51	4.8e-07	K	SLNNQFASFIDKVR	F					Ar_NoBSA
1		K2C1_PANTR	Keratin, type II cytoskeletal 1 OS=Pan troglodytes GN=KRT1 PE=2 SV=1	14690	65588	472	472	25	25	Pan troglodytes	9598	99224	1	0	1	819.929	1637.84	2	1637.85	-0.0094	1	76.98	5.9e-07	K	SLNNQFASFIDKVR	F					N2_NoBSA
1		K2C1_PANTR	Keratin, type II cytoskeletal 1 OS=Pan troglodytes GN=KRT1 PE=2 SV=1	14690	65588	472	472	25	25	Pan troglodytes	9598	99225	1	0	1	819.929	1637.84	2	1637.85	-0.009	1	65.91	6.5e-06	K	SLNNQFASFIDKVR	F					N2_NoBSA
1		K2C1_PANTR	Keratin, type II cytoskeletal 1 OS=Pan troglodytes GN=KRT1 PE=2 SV=1	14690	65588	472	472	25	25	Pan troglodytes	9598	99226	1	0	1	819.929	1637.84	2	1637.85	-0.0087	1	90.44	3e-08	K	SLNNQFASFIDKVR	F					Ar_BSA
1		K2C1_PANTR	Keratin, type II cytoskeletal 1 OS=Pan troglodytes GN=KRT1 PE=2 SV=1	14690	65588	472	472	25	25	Pan troglodytes	9598	99228	1	0	1	819.929	1637.84	2	1637.85	-0.0086	1	67.41	4.4e-06	K	SLNNQFASFIDKVR	F					Nh3_NoBSA
1		K2C1_PANTR	Keratin, type II cytoskeletal 1 OS=Pan troglodytes GN=KRT1 PE=2 SV=1	14690	65588	472	472	25	25	Pan troglodytes	9598	99230	1	0	1	819.929	1637.84	2	1637.85	-0.008	1	53.03	2.9e-05	K	SLNNQFASFIDKVR	F					Un_NoBSA
1		K2C1_PANTR	Keratin, type II cytoskeletal 1 OS=Pan troglodytes GN=KRT1 PE=2 SV=1	14690	65588	472	472	25	25	Pan troglodytes	9598	99231	1	0	1	819.93	1637.84	2	1637.85	-0.0077	1	43.7	0.00016	K	SLNNQFASFIDKVR	F					Ar_BSA
1		K2C1_PANTR	Keratin, type II cytoskeletal 1 OS=Pan troglodytes GN=KRT1 PE=2 SV=1	14690	65588	472	472	25	25	Pan troglodytes	9598	99232	1	0	1	819.93	1637.85	2	1637.85	-0.0075	1	85.98	8.2e-08	K	SLNNQFASFIDKVR	F					Ar_NoBSA
1		K2C1_PANTR	Keratin, type II cytoskeletal 1 OS=Pan troglodytes GN=KRT1 PE=2 SV=1	14690	65588	472	472	25	25	Pan troglodytes	9598	99233	1	0	1	819.93	1637.85	2	1637.85	-0.0067	1	69.7	8.8e-07	K	SLNNQFASFIDKVR	F					NoBSA
1		K2C1_PANTR	Keratin, type II cytoskeletal 1 OS=Pan troglodytes GN=KRT1 PE=2 SV=1	14690	65588	472	472	25	25	Pan troglodytes	9598	99234	1	0	1	819.93	1637.85	2	1637.85	-0.0063	1	56.13	2.1e-05	K	SLNNQFASFIDKVR	F					BSA
1		K2C1_PANTR	Keratin, type II cytoskeletal 1 OS=Pan troglodytes GN=KRT1 PE=2 SV=1	14690	65588	472	472	25	25	Pan troglodytes	9598	99235	1	0	1	819.932	1637.85	2	1637.85	-0.0037	1	90.69	2.8e-08	K	SLNNQFASFIDKVR	F					Nh3_NoBSA
1		K2C1_PANTR	Keratin, type II cytoskeletal 1 OS=Pan troglodytes GN=KRT1 PE=2 SV=1	14690	65588	472	472	25	25	Pan troglodytes	9598	99237	1	0	1	819.932	1637.85	2	1637.85	-0.0034	1	56.81	1.9e-05	K	SLNNQFASFIDKVR	F					N2_BSA
1		K2C1_PANTR	Keratin, type II cytoskeletal 1 OS=Pan troglodytes GN=KRT1 PE=2 SV=1	14690	65588	472	472	25	25	Pan troglodytes	9598	99240	1	0	1	819.933	1637.85	2	1637.85	-0.0018	1	67.93	3.4e-06	K	SLNNQFASFIDKVR	F					Un_NoBSA
1		K2C1_PANTR	Keratin, type II cytoskeletal 1 OS=Pan troglodytes GN=KRT1 PE=2 SV=1	14690	65588	472	472	25	25	Pan troglodytes	9598	99241	1	0	1	819.933	1637.85	2	1637.85	-0.0007	1	34.12	0.0016	K	SLNNQFASFIDKVR	F					Un_NoBSA
1		K2C1_PANTR	Keratin, type II cytoskeletal 1 OS=Pan troglodytes GN=KRT1 PE=2 SV=1	14690	65588	472	472	25	25	Pan troglodytes	9598	99242	1	0	1	819.933	1637.85	2	1637.85	-0.0004	1	68.51	2.2e-06	K	SLNNQFASFIDKVR	F					N2_BSA
1		K2C1_PANTR	Keratin, type II cytoskeletal 1 OS=Pan troglodytes GN=KRT1 PE=2 SV=1	14690	65588	472	472	25	25	Pan troglodytes	9598	99244	1	0	1	819.934	1637.85	2	1637.85	0.0004	1	74.83	8.3e-07	K	SLNNQFASFIDKVR	F					Un_BSA
1		K2C1_PANTR	Keratin, type II cytoskeletal 1 OS=Pan troglodytes GN=KRT1 PE=2 SV=1	14690	65588	472	472	25	25	Pan troglodytes	9598	99246	1	0	1	819.934	1637.85	2	1637.85	0.0011	1	55.27	3.5e-05	K	SLNNQFASFIDKVR	F					NoBSA
1		K2C1_PANTR	Keratin, type II cytoskeletal 1 OS=Pan troglodytes GN=KRT1 PE=2 SV=1	14690	65588	472	472	25	25	Pan troglodytes	9598	99248	1	0	1	819.935	1637.86	2	1637.85	0.0028	1	54.8	6.1e-05	K	SLNNQFASFIDKVR	F					Un_NoBSA
1		K2C1_PANTR	Keratin, type II cytoskeletal 1 OS=Pan troglodytes GN=KRT1 PE=2 SV=1	14690	65588	472	472	25	25	Pan troglodytes	9598	99251	1	0	1	819.938	1637.86	2	1637.85	0.0079	1	65.97	1.3e-06	K	SLNNQFASFIDKVR	F					BSA
1		K2C1_PANTR	Keratin, type II cytoskeletal 1 OS=Pan troglodytes GN=KRT1 PE=2 SV=1	14690	65588	472	472	25	25	Pan troglodytes	9598	100590	1	0	1	829.393	1656.77	2	1656.79	-0.0152	0	86.55	1.8e-08	R	SGGGFSSGSAGIINYQR	R					NoBSA
1		K2C1_PANTR	Keratin, type II cytoskeletal 1 OS=Pan troglodytes GN=KRT1 PE=2 SV=1	14690	65588	472	472	25	25	Pan troglodytes	9598	100591	1	0	1	829.393	1656.77	2	1656.79	-0.0151	0	100.4	9.3e-10	R	SGGGFSSGSAGIINYQR	R					Ar_NoBSA
1		K2C1_PANTR	Keratin, type II cytoskeletal 1 OS=Pan troglodytes GN=KRT1 PE=2 SV=1	14690	65588	472	472	25	25	Pan troglodytes	9598	100592	1	0	1	829.393	1656.77	2	1656.79	-0.014	0	93.96	3.8e-09	R	SGGGFSSGSAGIINYQR	R					Ar_NoBSA
1		K2C1_PANTR	Keratin, type II cytoskeletal 1 OS=Pan troglodytes GN=KRT1 PE=2 SV=1	14690	65588	472	472	25	25	Pan troglodytes	9598	100593	1	0	1	829.393	1656.77	2	1656.79	-0.0137	0	66.34	1.4e-06	R	SGGGFSSGSAGIINYQR	R					Nh3_NoBSA
1		K2C1_PANTR	Keratin, type II cytoskeletal 1 OS=Pan troglodytes GN=KRT1 PE=2 SV=1	14690	65588	472	472	25	25	Pan troglodytes	9598	100594	1	0	1	829.394	1656.77	2	1656.79	-0.0131	0	110.56	1.1e-10	R	SGGGFSSGSAGIINYQR	R					Un_BSA
1		K2C1_PANTR	Keratin, type II cytoskeletal 1 OS=Pan troglodytes GN=KRT1 PE=2 SV=1	14690	65588	472	472	25	25	Pan troglodytes	9598	100595	1	0	1	829.394	1656.77	2	1656.79	-0.0118	0	118.18	2.6e-11	R	SGGGFSSGSAGIINYQR	R					BSA
1		K2C1_PANTR	Keratin, type II cytoskeletal 1 OS=Pan troglodytes GN=KRT1 PE=2 SV=1	14690	65588	472	472	25	25	Pan troglodytes	9598	100596	1	0	1	829.395	1656.78	2	1656.79	-0.0103	0	90.79	3.7e-09	R	SGGGFSSGSAGIINYQR	R					N2_NoBSA
1		K2C1_PANTR	Keratin, type II cytoskeletal 1 OS=Pan troglodytes GN=KRT1 PE=2 SV=1	14690	65588	472	472	25	25	Pan troglodytes	9598	100597	1	0	1	829.395	1656.78	2	1656.79	-0.0095	0	88.14	5.4e-09	R	SGGGFSSGSAGIINYQR	R					Ar_BSA
1		K2C1_PANTR	Keratin, type II cytoskeletal 1 OS=Pan troglodytes GN=KRT1 PE=2 SV=1	14690	65588	472	472	25	25	Pan troglodytes	9598	100598	1	0	1	829.396	1656.78	2	1656.79	-0.0086	0	83.19	2.2e-08	R	SGGGFSSGSAGIINYQR	R					NoBSA
1		K2C1_PANTR	Keratin, type II cytoskeletal 1 OS=Pan troglodytes GN=KRT1 PE=2 SV=1	14690	65588	472	472	25	25	Pan troglodytes	9598	100599	1	0	1	829.396	1656.78	2	1656.79	-0.0077	0	94.12	3.5e-09	R	SGGGFSSGSAGIINYQR	R					BSA
1		K2C1_PANTR	Keratin, type II cytoskeletal 1 OS=Pan troglodytes GN=KRT1 PE=2 SV=1	14690	65588	472	472	25	25	Pan troglodytes	9598	100600	1	0	1	829.396	1656.78	2	1656.79	-0.0074	0	107.56	1.2e-10	R	SGGGFSSGSAGIINYQR	R					Nh3_BSA
1		K2C1_PANTR	Keratin, type II cytoskeletal 1 OS=Pan troglodytes GN=KRT1 PE=2 SV=1	14690	65588	472	472	25	25	Pan troglodytes	9598	100601	1	0	1	829.397	1656.78	2	1656.79	-0.0059	0	105.84	2.7e-10	R	SGGGFSSGSAGIINYQR	R					Un_NoBSA
1		K2C1_PANTR	Keratin, type II cytoskeletal 1 OS=Pan troglodytes GN=KRT1 PE=2 SV=1	14690	65588	472	472	25	25	Pan troglodytes	9598	100602	1	0	1	829.398	1656.78	2	1656.79	-0.005	0	105.78	2.8e-10	R	SGGGFSSGSAGIINYQR	R					Un_BSA
1		K2C1_PANTR	Keratin, type II cytoskeletal 1 OS=Pan troglodytes GN=KRT1 PE=2 SV=1	14690	65588	472	472	25	25	Pan troglodytes	9598	100603	1	0	1	829.398	1656.78	2	1656.79	-0.0042	0	122.75	1e-11	R	SGGGFSSGSAGIINYQR	R					Un_NoBSA
1		K2C1_PANTR	Keratin, type II cytoskeletal 1 OS=Pan troglodytes GN=KRT1 PE=2 SV=1	14690	65588	472	472	25	25	Pan troglodytes	9598	100604	1	0	1	829.398	1656.78	2	1656.79	-0.0037	0	76.99	8.8e-08	R	SGGGFSSGSAGIINYQR	R					Un_BSA
1		K2C1_PANTR	Keratin, type II cytoskeletal 1 OS=Pan troglodytes GN=KRT1 PE=2 SV=1	14690	65588	472	472	25	25	Pan troglodytes	9598	100605	1	0	1	829.398	1656.78	2	1656.79	-0.0037	0	101.87	9.7e-10	R	SGGGFSSGSAGIINYQR	R					Ar_BSA
1		K2C1_PANTR	Keratin, type II cytoskeletal 1 OS=Pan troglodytes GN=KRT1 PE=2 SV=1	14690	65588	472	472	25	25	Pan troglodytes	9598	100606	1	0	1	829.399	1656.78	2	1656.79	-0.0029	0	118.32	3.3e-11	R	SGGGFSSGSAGIINYQR	R					BSA
1		K2C1_PANTR	Keratin, type II cytoskeletal 1 OS=Pan troglodytes GN=KRT1 PE=2 SV=1	14690	65588	472	472	25	25	Pan troglodytes	9598	100607	1	0	1	829.399	1656.78	2	1656.79	-0.0027	0	118.7	1.2e-11	R	SGGGFSSGSAGIINYQR	R					Nh3_BSA
1		K2C1_PANTR	Keratin, type II cytoskeletal 1 OS=Pan troglodytes GN=KRT1 PE=2 SV=1	14690	65588	472	472	25	25	Pan troglodytes	9598	100608	1	0	1	829.4	1656.79	2	1656.79	-0.0001	0	96.52	8.9e-10	R	SGGGFSSGSAGIINYQR	R					Nh3_NoBSA
1		K2C1_PANTR	Keratin, type II cytoskeletal 1 OS=Pan troglodytes GN=KRT1 PE=2 SV=1	14690	65588	472	472	25	25	Pan troglodytes	9598	100609	1	0	1	829.4	1656.79	2	1656.79	-0.0001	0	96.65	8.7e-10	R	SGGGFSSGSAGIINYQR	R					BSA
1		K2C1_PANTR	Keratin, type II cytoskeletal 1 OS=Pan troglodytes GN=KRT1 PE=2 SV=1	14690	65588	472	472	25	25	Pan troglodytes	9598	100610	1	0	1	829.401	1656.79	2	1656.79	0.002	0	96.71	8.6e-10	R	SGGGFSSGSAGIINYQR	R					N2_BSA
1		K2C1_PANTR	Keratin, type II cytoskeletal 1 OS=Pan troglodytes GN=KRT1 PE=2 SV=1	14690	65588	472	472	25	25	Pan troglodytes	9598	100611	1	0	1	829.402	1656.79	2	1656.79	0.0043	0	92.88	3.9e-09	R	SGGGFSSGSAGIINYQR	R					Nh3_NoBSA
1		K2C1_PANTR	Keratin, type II cytoskeletal 1 OS=Pan troglodytes GN=KRT1 PE=2 SV=1	14690	65588	472	472	25	25	Pan troglodytes	9598	100612	1	0	1	829.404	1656.79	2	1656.79	0.0076	0	109.73	6.1e-11	R	SGGGFSSGSAGIINYQR	R					Un_NoBSA
1		K2C1_PANTR	Keratin, type II cytoskeletal 1 OS=Pan troglodytes GN=KRT1 PE=2 SV=1	14690	65588	472	472	25	25	Pan troglodytes	9598	103808	1	0	1	858.922	1715.83	2	1715.84	-0.0143	0	77.43	5.5e-08	K	QISNLQQSISDAEQR	G					Un_NoBSA
1		K2C1_PANTR	Keratin, type II cytoskeletal 1 OS=Pan troglodytes GN=KRT1 PE=2 SV=1	14690	65588	472	472	25	25	Pan troglodytes	9598	103809	1	0	1	858.923	1715.83	2	1715.84	-0.0123	0	85.3	3.6e-08	K	QISNLQQSISDAEQR	G					Ar_NoBSA
1		K2C1_PANTR	Keratin, type II cytoskeletal 1 OS=Pan troglodytes GN=KRT1 PE=2 SV=1	14690	65588	472	472	25	25	Pan troglodytes	9598	103810	1	0	1	858.923	1715.83	2	1715.84	-0.0121	0	100.79	9.4e-10	K	QISNLQQSISDAEQR	G					BSA
1		K2C1_PANTR	Keratin, type II cytoskeletal 1 OS=Pan troglodytes GN=KRT1 PE=2 SV=1	14690	65588	472	472	25	25	Pan troglodytes	9598	103811	1	0	1	858.923	1715.83	2	1715.84	-0.0114	0	71.51	3.4e-07	K	QISNLQQSISDAEQR	G					NoBSA
1		K2C1_PANTR	Keratin, type II cytoskeletal 1 OS=Pan troglodytes GN=KRT1 PE=2 SV=1	14690	65588	472	472	25	25	Pan troglodytes	9598	103812	1	0	1	858.924	1715.83	2	1715.84	-0.0095	0	96.62	7.4e-09	K	QISNLQQSISDAEQR	G					Un_NoBSA
1		K2C1_PANTR	Keratin, type II cytoskeletal 1 OS=Pan troglodytes GN=KRT1 PE=2 SV=1	14690	65588	472	472	25	25	Pan troglodytes	9598	103814	1	0	1	858.926	1715.84	2	1715.84	-0.0066	0	72.04	7.9e-07	K	QISNLQQSISDAEQR	G					BSA
1		K2C1_PANTR	Keratin, type II cytoskeletal 1 OS=Pan troglodytes GN=KRT1 PE=2 SV=1	14690	65588	472	472	25	25	Pan troglodytes	9598	103815	1	0	1	858.926	1715.84	2	1715.84	-0.0063	0	63.8	1.3e-06	K	QISNLQQSISDAEQR	G					N2_BSA
1		K2C1_PANTR	Keratin, type II cytoskeletal 1 OS=Pan troglodytes GN=KRT1 PE=2 SV=1	14690	65588	472	472	25	25	Pan troglodytes	9598	103816	1	0	1	858.926	1715.84	2	1715.84	-0.0063	0	94.06	7e-09	K	QISNLQQSISDAEQR	G					Ar_BSA
1		K2C1_PANTR	Keratin, type II cytoskeletal 1 OS=Pan troglodytes GN=KRT1 PE=2 SV=1	14690	65588	472	472	25	25	Pan troglodytes	9598	103817	1	0	1	858.926	1715.84	2	1715.84	-0.0061	0	98.68	3.5e-09	K	QISNLQQSISDAEQR	G					Un_BSA
1		K2C1_PANTR	Keratin, type II cytoskeletal 1 OS=Pan troglodytes GN=KRT1 PE=2 SV=1	14690	65588	472	472	25	25	Pan troglodytes	9598	103818	1	0	1	858.926	1715.84	2	1715.84	-0.0058	0	66.01	1e-06	K	QISNLQQSISDAEQR	G					Nh3_NoBSA
1		K2C1_PANTR	Keratin, type II cytoskeletal 1 OS=Pan troglodytes GN=KRT1 PE=2 SV=1	14690	65588	472	472	25	25	Pan troglodytes	9598	103819	1	0	1	858.926	1715.84	2	1715.84	-0.0057	0	87.82	3.6e-08	K	QISNLQQSISDAEQR	G					Nh3_NoBSA
1		K2C1_PANTR	Keratin, type II cytoskeletal 1 OS=Pan troglodytes GN=KRT1 PE=2 SV=1	14690	65588	472	472	25	25	Pan troglodytes	9598	103820	1	0	1	858.927	1715.84	2	1715.84	-0.0052	0	70.7	5.1e-07	K	QISNLQQSISDAEQR	G					BSA
1		K2C1_PANTR	Keratin, type II cytoskeletal 1 OS=Pan troglodytes GN=KRT1 PE=2 SV=1	14690	65588	472	472	25	25	Pan troglodytes	9598	103821	1	0	1	858.927	1715.84	2	1715.84	-0.0052	0	94.28	9.5e-09	K	QISNLQQSISDAEQR	G					Ar_BSA
1		K2C1_PANTR	Keratin, type II cytoskeletal 1 OS=Pan troglodytes GN=KRT1 PE=2 SV=1	14690	65588	472	472	25	25	Pan troglodytes	9598	103822	1	0	1	858.927	1715.84	2	1715.84	-0.0049	0	97.76	1.4e-09	K	QISNLQQSISDAEQR	G					Ar_BSA
1		K2C1_PANTR	Keratin, type II cytoskeletal 1 OS=Pan troglodytes GN=KRT1 PE=2 SV=1	14690	65588	472	472	25	25	Pan troglodytes	9598	103823	1	0	1	858.927	1715.84	2	1715.84	-0.0037	0	77.26	5.9e-07	K	QISNLQQSISDAEQR	G					N2_NoBSA
1		K2C1_PANTR	Keratin, type II cytoskeletal 1 OS=Pan troglodytes GN=KRT1 PE=2 SV=1	14690	65588	472	472	25	25	Pan troglodytes	9598	103824	1	0	1	858.928	1715.84	2	1715.84	-0.0033	0	81.22	5.9e-08	K	QISNLQQSISDAEQR	G					NoBSA
1		K2C1_PANTR	Keratin, type II cytoskeletal 1 OS=Pan troglodytes GN=KRT1 PE=2 SV=1	14690	65588	472	472	25	25	Pan troglodytes	9598	103825	1	0	1	858.928	1715.84	2	1715.84	-0.0031	0	106.94	4.4e-10	K	QISNLQQSISDAEQR	G					Nh3_NoBSA
1		K2C1_PANTR	Keratin, type II cytoskeletal 1 OS=Pan troglodytes GN=KRT1 PE=2 SV=1	14690	65588	472	472	25	25	Pan troglodytes	9598	103826	1	0	1	858.928	1715.84	2	1715.84	-0.0019	0	75.35	8.6e-08	K	QISNLQQSISDAEQR	G					N2_NoBSA
1		K2C1_PANTR	Keratin, type II cytoskeletal 1 OS=Pan troglodytes GN=KRT1 PE=2 SV=1	14690	65588	472	472	25	25	Pan troglodytes	9598	103827	1	0	1	858.928	1715.84	2	1715.84	-0.0019	0	104.03	6.1e-10	K	QISNLQQSISDAEQR	G					Un_BSA
1		K2C1_PANTR	Keratin, type II cytoskeletal 1 OS=Pan troglodytes GN=KRT1 PE=2 SV=1	14690	65588	472	472	25	25	Pan troglodytes	9598	103828	1	0	1	858.928	1715.84	2	1715.84	-0.0016	0	82.23	5.4e-08	K	QISNLQQSISDAEQR	G					Nh3_BSA
1		K2C1_PANTR	Keratin, type II cytoskeletal 1 OS=Pan troglodytes GN=KRT1 PE=2 SV=1	14690	65588	472	472	25	25	Pan troglodytes	9598	103829	1	0	1	858.929	1715.84	2	1715.84	0.0006	0	67.7	4.5e-07	K	QISNLQQSISDAEQR	G					Ar_NoBSA
1		K2C1_PANTR	Keratin, type II cytoskeletal 1 OS=Pan troglodytes GN=KRT1 PE=2 SV=1	14690	65588	472	472	25	25	Pan troglodytes	9598	103830	1	0	1	858.929	1715.84	2	1715.84	0.0007	0	93.49	1.7e-09	K	QISNLQQSISDAEQR	G					Un_NoBSA
1		K2C1_PANTR	Keratin, type II cytoskeletal 1 OS=Pan troglodytes GN=KRT1 PE=2 SV=1	14690	65588	472	472	25	25	Pan troglodytes	9598	103831	1	0	1	858.93	1715.85	2	1715.84	0.0019	0	80.33	2.9e-08	K	QISNLQQSISDAEQR	G					BSA
1		K2C1_PANTR	Keratin, type II cytoskeletal 1 OS=Pan troglodytes GN=KRT1 PE=2 SV=1	14690	65588	472	472	25	25	Pan troglodytes	9598	103835	1	0	1	858.933	1715.85	2	1715.84	0.0067	0	90.84	3e-09	K	QISNLQQSISDAEQR	G					N2_NoBSA
1		K2C1_PANTR	Keratin, type II cytoskeletal 1 OS=Pan troglodytes GN=KRT1 PE=2 SV=1	14690	65588	472	472	25	25	Pan troglodytes	9598	103836	1	0	1	858.933	1715.85	2	1715.84	0.0077	0	42.13	0.00017	K	QISNLQQSISDAEQR	G					Nh3_BSA
1		K2C1_PANTR	Keratin, type II cytoskeletal 1 OS=Pan troglodytes GN=KRT1 PE=2 SV=1	14690	65588	472	472	25	25	Pan troglodytes	9598	103837	1	0	1	858.934	1715.85	2	1715.84	0.0104	0	74.44	1e-07	K	QISNLQQSISDAEQR	G					N2_BSA
1		K2C1_PANTR	Keratin, type II cytoskeletal 1 OS=Pan troglodytes GN=KRT1 PE=2 SV=1	14690	65588	472	472	25	25	Pan troglodytes	9598	103691	1	0	1	859.427	1716.84	2	1716.83	0.0109	0	46.03	0.00013	K	QISNLQQSISDAEQR	G	Deamidated (NQ)	0.000100000000000.0			N2_BSA
1		K2C1_PANTR	Keratin, type II cytoskeletal 1 OS=Pan troglodytes GN=KRT1 PE=2 SV=1	14690	65588	472	472	25	25	Pan troglodytes	9598	109745	1	0	1	615.658	1843.95	3	1843.94	0.0135	1	62.57	1.8e-06	K	KQISNLQQSISDAEQR	G					Nh3_NoBSA
1		K2C1_PANTR	Keratin, type II cytoskeletal 1 OS=Pan troglodytes GN=KRT1 PE=2 SV=1	14690	65588	472	472	25	25	Pan troglodytes	9598	109746	1	0	1	615.66	1843.96	3	1843.94	0.0184	1	77.88	8.4e-08	K	KQISNLQQSISDAEQR	G					N2_NoBSA
1		K2C1_PANTR	Keratin, type II cytoskeletal 1 OS=Pan troglodytes GN=KRT1 PE=2 SV=1	14690	65588	472	472	25	25	Pan troglodytes	9598	114350	1	0	1	971.489	1940.96	2	1940.98	-0.0176	1	64.26	4.5e-06	K	LNDLEDALQQAKEDLAR	L					Nh3_NoBSA
1		K2C1_PANTR	Keratin, type II cytoskeletal 1 OS=Pan troglodytes GN=KRT1 PE=2 SV=1	14690	65588	472	472	25	25	Pan troglodytes	9598	114351	1	0	1	971.492	1940.97	2	1940.98	-0.0112	1	55.65	6.1e-06	K	LNDLEDALQQAKEDLAR	L					N2_NoBSA
1		K2C1_PANTR	Keratin, type II cytoskeletal 1 OS=Pan troglodytes GN=KRT1 PE=2 SV=1	14690	65588	472	472	25	25	Pan troglodytes	9598	114354	1	0	1	648.001	1940.98	3	1940.98	0.0025	1	33.52	0.0032	K	LNDLEDALQQAKEDLAR	L					BSA
1		K2C1_PANTR	Keratin, type II cytoskeletal 1 OS=Pan troglodytes GN=KRT1 PE=2 SV=1	14690	65588	472	472	25	25	Pan troglodytes	9598	114357	1	0	1	648.003	1940.99	3	1940.98	0.0061	1	49.02	0.00013	K	LNDLEDALQQAKEDLAR	L					Nh3_BSA
1		K2C1_PANTR	Keratin, type II cytoskeletal 1 OS=Pan troglodytes GN=KRT1 PE=2 SV=1	14690	65588	472	472	25	25	Pan troglodytes	9598	114358	1	0	1	648.004	1940.99	3	1940.98	0.0096	1	66.92	5.9e-07	K	LNDLEDALQQAKEDLAR	L					Un_BSA
1		K2C1_PANTR	Keratin, type II cytoskeletal 1 OS=Pan troglodytes GN=KRT1 PE=2 SV=1	14690	65588	472	472	25	25	Pan troglodytes	9598	114360	1	0	1	648.006	1941	3	1940.98	0.015	1	48.63	8.4e-05	K	LNDLEDALQQAKEDLAR	L					N2_NoBSA
1		K2C1_PANTR	Keratin, type II cytoskeletal 1 OS=Pan troglodytes GN=KRT1 PE=2 SV=1	14690	65588	472	472	25	25	Pan troglodytes	9598	114361	1	0	1	648.006	1941	3	1940.98	0.0152	1	32.05	0.00099	K	LNDLEDALQQAKEDLAR	L					N2_NoBSA
1		K2C1_PANTR	Keratin, type II cytoskeletal 1 OS=Pan troglodytes GN=KRT1 PE=2 SV=1	14690	65588	472	472	25	25	Pan troglodytes	9598	114175	1	0	1	648.006	1941	3	1940.98	0.0157	1	59.74	7.5e-06	K	LNDLEDALQQAKEDLAR	L					Ar_BSA
1		K2C1_PANTR	Keratin, type II cytoskeletal 1 OS=Pan troglodytes GN=KRT1 PE=2 SV=1	14690	65588	472	472	25	25	Pan troglodytes	9598	114362	1	0	1	648.007	1941	3	1940.98	0.0179	1	74.44	6.5e-07	K	LNDLEDALQQAKEDLAR	L					Nh3_NoBSA
1		K2C1_PANTR	Keratin, type II cytoskeletal 1 OS=Pan troglodytes GN=KRT1 PE=2 SV=1	14690	65588	472	472	25	25	Pan troglodytes	9598	114363	1	0	1	648.007	1941	3	1940.98	0.0183	1	55.04	2.1e-05	K	LNDLEDALQQAKEDLAR	L					Un_NoBSA
1		K2C1_PANTR	Keratin, type II cytoskeletal 1 OS=Pan troglodytes GN=KRT1 PE=2 SV=1	14690	65588	472	472	25	25	Pan troglodytes	9598	114364	1	0	1	648.007	1941	3	1940.98	0.0194	1	67.44	6.8e-07	K	LNDLEDALQQAKEDLAR	L					Ar_NoBSA
1		K2C1_PANTR	Keratin, type II cytoskeletal 1 OS=Pan troglodytes GN=KRT1 PE=2 SV=1	14690	65588	472	472	25	25	Pan troglodytes	9598	114471	1	0	1	648.334	1941.98	3	1941.96	0.0156	1	32.06	0.0044	K	LNDLEDALQQAKEDLAR	L	Deamidated (NQ)	0.00000000010000000.0			Nh3_NoBSA
1		K2C1_PANTR	Keratin, type II cytoskeletal 1 OS=Pan troglodytes GN=KRT1 PE=2 SV=1	14690	65588	472	472	25	25	Pan troglodytes	9598	116434	1	0	1	997.482	1992.95	2	1992.97	-0.0197	0	41.71	0.00012	R	THNLEPYFESFINNLR	R					Nh3_BSA
1		K2C1_PANTR	Keratin, type II cytoskeletal 1 OS=Pan troglodytes GN=KRT1 PE=2 SV=1	14690	65588	472	472	25	25	Pan troglodytes	9598	116435	1	0	1	997.482	1992.95	2	1992.97	-0.0191	0	36.14	0.00041	R	THNLEPYFESFINNLR	R					N2_NoBSA
1		K2C1_PANTR	Keratin, type II cytoskeletal 1 OS=Pan troglodytes GN=KRT1 PE=2 SV=1	14690	65588	472	472	25	25	Pan troglodytes	9598	116436	1	0	1	997.482	1992.95	2	1992.97	-0.0191	0	58.28	3.4e-06	R	THNLEPYFESFINNLR	R					Un_NoBSA
1		K2C1_PANTR	Keratin, type II cytoskeletal 1 OS=Pan troglodytes GN=KRT1 PE=2 SV=1	14690	65588	472	472	25	25	Pan troglodytes	9598	116437	1	0	1	997.483	1992.95	2	1992.97	-0.0188	0	57.06	4.5e-06	R	THNLEPYFESFINNLR	R					Nh3_NoBSA
1		K2C1_PANTR	Keratin, type II cytoskeletal 1 OS=Pan troglodytes GN=KRT1 PE=2 SV=1	14690	65588	472	472	25	25	Pan troglodytes	9598	116438	1	0	1	997.483	1992.95	2	1992.97	-0.0185	0	49.74	2.6e-05	R	THNLEPYFESFINNLR	R					Ar_NoBSA
1		K2C1_PANTR	Keratin, type II cytoskeletal 1 OS=Pan troglodytes GN=KRT1 PE=2 SV=1	14690	65588	472	472	25	25	Pan troglodytes	9598	116439	1	0	1	997.483	1992.95	2	1992.97	-0.0178	0	47.56	4.3e-05	R	THNLEPYFESFINNLR	R					Un_BSA
1		K2C1_PANTR	Keratin, type II cytoskeletal 1 OS=Pan troglodytes GN=KRT1 PE=2 SV=1	14690	65588	472	472	25	25	Pan troglodytes	9598	116440	1	0	1	997.484	1992.95	2	1992.97	-0.0167	0	43.22	8.9e-05	R	THNLEPYFESFINNLR	R					Ar_BSA
1		K2C1_PANTR	Keratin, type II cytoskeletal 1 OS=Pan troglodytes GN=KRT1 PE=2 SV=1	14690	65588	472	472	25	25	Pan troglodytes	9598	116441	1	0	1	997.484	1992.95	2	1992.97	-0.0155	0	40.76	0.00015	R	THNLEPYFESFINNLR	R					Un_NoBSA
1		K2C1_PANTR	Keratin, type II cytoskeletal 1 OS=Pan troglodytes GN=KRT1 PE=2 SV=1	14690	65588	472	472	25	25	Pan troglodytes	9598	116442	1	0	1	997.485	1992.95	2	1992.97	-0.0147	0	43.7	8e-05	R	THNLEPYFESFINNLR	R					Un_NoBSA
1		K2C1_PANTR	Keratin, type II cytoskeletal 1 OS=Pan troglodytes GN=KRT1 PE=2 SV=1	14690	65588	472	472	25	25	Pan troglodytes	9598	116443	1	0	1	997.485	1992.96	2	1992.97	-0.014	0	54.27	1.2e-05	R	THNLEPYFESFINNLR	R					Nh3_NoBSA
1		K2C1_PANTR	Keratin, type II cytoskeletal 1 OS=Pan troglodytes GN=KRT1 PE=2 SV=1	14690	65588	472	472	25	25	Pan troglodytes	9598	116444	1	0	1	997.486	1992.96	2	1992.97	-0.0126	0	59.71	3.2e-06	R	THNLEPYFESFINNLR	R					NoBSA
1		K2C1_PANTR	Keratin, type II cytoskeletal 1 OS=Pan troglodytes GN=KRT1 PE=2 SV=1	14690	65588	472	472	25	25	Pan troglodytes	9598	116445	1	0	1	997.486	1992.96	2	1992.97	-0.0123	0	29.22	0.0018	R	THNLEPYFESFINNLR	R					N2_BSA
1		K2C1_PANTR	Keratin, type II cytoskeletal 1 OS=Pan troglodytes GN=KRT1 PE=2 SV=1	14690	65588	472	472	25	25	Pan troglodytes	9598	116448	1	0	1	997.487	1992.96	2	1992.97	-0.0107	0	25.67	0.0039	R	THNLEPYFESFINNLR	R					BSA
1		K2C1_PANTR	Keratin, type II cytoskeletal 1 OS=Pan troglodytes GN=KRT1 PE=2 SV=1	14690	65588	472	472	25	25	Pan troglodytes	9598	116449	1	0	1	665.328	1992.96	3	1992.97	-0.0057	0	63.62	1.1e-06	R	THNLEPYFESFINNLR	R					Un_NoBSA
1		K2C1_PANTR	Keratin, type II cytoskeletal 1 OS=Pan troglodytes GN=KRT1 PE=2 SV=1	14690	65588	472	472	25	25	Pan troglodytes	9598	116450	1	0	1	665.33	1992.97	3	1992.97	-0.0016	0	35.27	0.00063	R	THNLEPYFESFINNLR	R					Ar_BSA
1		K2C1_PANTR	Keratin, type II cytoskeletal 1 OS=Pan troglodytes GN=KRT1 PE=2 SV=1	14690	65588	472	472	25	25	Pan troglodytes	9598	116451	1	0	1	665.331	1992.97	3	1992.97	0.0019	0	64.8	9.9e-07	R	THNLEPYFESFINNLR	R					N2_NoBSA
1		K2C1_PANTR	Keratin, type II cytoskeletal 1 OS=Pan troglodytes GN=KRT1 PE=2 SV=1	14690	65588	472	472	25	25	Pan troglodytes	9598	116456	1	0	1	665.334	1992.98	3	1992.97	0.0106	0	39.79	0.00019	R	THNLEPYFESFINNLR	R					BSA
1		K2C1_PANTR	Keratin, type II cytoskeletal 1 OS=Pan troglodytes GN=KRT1 PE=2 SV=1	14690	65588	472	472	25	25	Pan troglodytes	9598	116457	1	0	1	665.334	1992.98	3	1992.97	0.0117	0	45.73	5.8e-05	R	THNLEPYFESFINNLR	R					BSA
1		K2C1_PANTR	Keratin, type II cytoskeletal 1 OS=Pan troglodytes GN=KRT1 PE=2 SV=1	14690	65588	472	472	25	25	Pan troglodytes	9598	116458	1	0	1	665.334	1992.98	3	1992.97	0.0122	0	51.04	1.8e-05	R	THNLEPYFESFINNLR	R					Nh3_NoBSA
1		K2C1_PANTR	Keratin, type II cytoskeletal 1 OS=Pan troglodytes GN=KRT1 PE=2 SV=1	14690	65588	472	472	25	25	Pan troglodytes	9598	116459	1	0	1	665.335	1992.98	3	1992.97	0.0131	0	52.41	1.2e-05	R	THNLEPYFESFINNLR	R					N2_BSA
1		K2C1_PANTR	Keratin, type II cytoskeletal 1 OS=Pan troglodytes GN=KRT1 PE=2 SV=1	14690	65588	472	472	25	25	Pan troglodytes	9598	116460	1	0	1	665.335	1992.98	3	1992.97	0.0136	0	54.38	8e-06	R	THNLEPYFESFINNLR	R					Nh3_BSA
1		K2C1_PANTR	Keratin, type II cytoskeletal 1 OS=Pan troglodytes GN=KRT1 PE=2 SV=1	14690	65588	472	472	25	25	Pan troglodytes	9598	116461	1	0	1	665.335	1992.98	3	1992.97	0.0141	0	48.72	2.7e-05	R	THNLEPYFESFINNLR	R					Ar_BSA
1		K2C1_PANTR	Keratin, type II cytoskeletal 1 OS=Pan troglodytes GN=KRT1 PE=2 SV=1	14690	65588	472	472	25	25	Pan troglodytes	9598	116463	1	0	1	665.336	1992.99	3	1992.97	0.0162	0	58.51	3.3e-06	R	THNLEPYFESFINNLR	R					Nh3_BSA
1		K2C1_PANTR	Keratin, type II cytoskeletal 1 OS=Pan troglodytes GN=KRT1 PE=2 SV=1	14690	65588	472	472	25	25	Pan troglodytes	9598	116464	1	0	1	665.336	1992.99	3	1992.97	0.0167	0	67.75	6.4e-07	R	THNLEPYFESFINNLR	R					Ar_NoBSA
1		K2C1_PANTR	Keratin, type II cytoskeletal 1 OS=Pan troglodytes GN=KRT1 PE=2 SV=1	14690	65588	472	472	25	25	Pan troglodytes	9598	116465	1	0	1	665.336	1992.99	3	1992.97	0.0169	0	50.12	2e-05	R	THNLEPYFESFINNLR	R					Un_BSA
1		K2C1_PANTR	Keratin, type II cytoskeletal 1 OS=Pan troglodytes GN=KRT1 PE=2 SV=1	14690	65588	472	472	25	25	Pan troglodytes	9598	116466	1	0	1	665.337	1992.99	3	1992.97	0.019	0	65.59	8e-07	R	THNLEPYFESFINNLR	R					N2_NoBSA
1		K2C1_PANTR	Keratin, type II cytoskeletal 1 OS=Pan troglodytes GN=KRT1 PE=2 SV=1	14690	65588	472	472	25	25	Pan troglodytes	9598	116467	1	0	1	665.337	1992.99	3	1992.97	0.019	0	65.46	7.3e-07	R	THNLEPYFESFINNLR	R					Un_BSA
1		K2C1_PANTR	Keratin, type II cytoskeletal 1 OS=Pan troglodytes GN=KRT1 PE=2 SV=1	14690	65588	472	472	25	25	Pan troglodytes	9598	116469	1	0	1	665.337	1992.99	3	1992.97	0.0195	0	80.23	4.3e-08	R	THNLEPYFESFINNLR	R					BSA
1		K2C1_PANTR	Keratin, type II cytoskeletal 1 OS=Pan troglodytes GN=KRT1 PE=2 SV=1	14690	65588	472	472	25	25	Pan troglodytes	9598	116383	1	0	1	665.657	1993.95	3	1993.95	-0.0034	0	42.97	0.00017	R	THNLEPYFESFINNLR	R	Deamidated (NQ)	0.0000000000000100.0			Un_BSA
1		K2C1_PANTR	Keratin, type II cytoskeletal 1 OS=Pan troglodytes GN=KRT1 PE=2 SV=1	14690	65588	472	472	25	25	Pan troglodytes	9598	116497	1	0	1	665.664	1993.97	3	1993.95	0.0161	0	47.26	3.7e-05	R	THNLEPYFESFINNLR	R	Deamidated (NQ)	0.0000000000001000.0			Nh3_NoBSA
1		K2C1_PANTR	Keratin, type II cytoskeletal 1 OS=Pan troglodytes GN=KRT1 PE=2 SV=1	14690	65588	472	472	25	25	Pan troglodytes	9598	116498	1	0	1	665.664	1993.97	3	1993.95	0.0178	0	44.75	6.4e-05	R	THNLEPYFESFINNLR	R	Deamidated (NQ)	0.0000000000001000.0			Ar_NoBSA
1		K2C1_PANTR	Keratin, type II cytoskeletal 1 OS=Pan troglodytes GN=KRT1 PE=2 SV=1	14690	65588	472	472	25	25	Pan troglodytes	9598	121469	1	0	1	717.363	2149.07	3	2149.07	-0.0031	1	21.58	0.0095	R	THNLEPYFESFINNLRR	R					Un_BSA
1		K2C1_PANTR	Keratin, type II cytoskeletal 1 OS=Pan troglodytes GN=KRT1 PE=2 SV=1	14690	65588	472	472	25	25	Pan troglodytes	9598	121470	1	0	1	717.364	2149.07	3	2149.07	-0.0011	1	22.07	0.0085	R	THNLEPYFESFINNLRR	R					Ar_NoBSA
1		K2C1_PANTR	Keratin, type II cytoskeletal 1 OS=Pan troglodytes GN=KRT1 PE=2 SV=1	14690	65588	472	472	25	25	Pan troglodytes	9598	121474	1	0	1	717.365	2149.07	3	2149.07	0.0012	1	31.12	0.0012	R	THNLEPYFESFINNLRR	R					Ar_NoBSA
1		K2C1_PANTR	Keratin, type II cytoskeletal 1 OS=Pan troglodytes GN=KRT1 PE=2 SV=1	14690	65588	472	472	25	25	Pan troglodytes	9598	121475	1	0	1	717.365	2149.07	3	2149.07	0.0015	1	47.9	3.2e-05	R	THNLEPYFESFINNLRR	R					Ar_BSA
1		K2C1_PANTR	Keratin, type II cytoskeletal 1 OS=Pan troglodytes GN=KRT1 PE=2 SV=1	14690	65588	472	472	25	25	Pan troglodytes	9598	121476	1	0	1	717.365	2149.07	3	2149.07	0.0017	1	31.27	0.0012	R	THNLEPYFESFINNLRR	R					BSA
1		K2C1_PANTR	Keratin, type II cytoskeletal 1 OS=Pan troglodytes GN=KRT1 PE=2 SV=1	14690	65588	472	472	25	25	Pan troglodytes	9598	121477	1	0	1	717.365	2149.07	3	2149.07	0.0023	1	24.13	0.0055	R	THNLEPYFESFINNLRR	R					Un_BSA
1		K2C1_PANTR	Keratin, type II cytoskeletal 1 OS=Pan troglodytes GN=KRT1 PE=2 SV=1	14690	65588	472	472	25	25	Pan troglodytes	9598	121478	1	0	1	717.365	2149.07	3	2149.07	0.0034	1	33.47	0.00073	R	THNLEPYFESFINNLRR	R					Ar_BSA
1		K2C1_PANTR	Keratin, type II cytoskeletal 1 OS=Pan troglodytes GN=KRT1 PE=2 SV=1	14690	65588	472	472	25	25	Pan troglodytes	9598	121480	1	0	1	717.366	2149.08	3	2149.07	0.0051	1	43.47	8.4e-05	R	THNLEPYFESFINNLRR	R					Ar_BSA
1		K2C1_PANTR	Keratin, type II cytoskeletal 1 OS=Pan troglodytes GN=KRT1 PE=2 SV=1	14690	65588	472	472	25	25	Pan troglodytes	9598	121481	1	0	1	717.366	2149.08	3	2149.07	0.0052	1	21.85	0.0089	R	THNLEPYFESFINNLRR	R					Nh3_NoBSA
1		K2C1_PANTR	Keratin, type II cytoskeletal 1 OS=Pan troglodytes GN=KRT1 PE=2 SV=1	14690	65588	472	472	25	25	Pan troglodytes	9598	121482	1	0	1	717.366	2149.08	3	2149.07	0.0066	1	46.68	4.2e-05	R	THNLEPYFESFINNLRR	R					BSA
1		K2C1_PANTR	Keratin, type II cytoskeletal 1 OS=Pan troglodytes GN=KRT1 PE=2 SV=1	14690	65588	472	472	25	25	Pan troglodytes	9598	121483	1	0	1	717.366	2149.08	3	2149.07	0.0068	1	27.75	0.0025	R	THNLEPYFESFINNLRR	R					N2_BSA
1		K2C1_PANTR	Keratin, type II cytoskeletal 1 OS=Pan troglodytes GN=KRT1 PE=2 SV=1	14690	65588	472	472	25	25	Pan troglodytes	9598	121485	1	0	1	717.366	2149.08	3	2149.07	0.0073	1	25.58	0.006	R	THNLEPYFESFINNLRR	R					N2_BSA
1		K2C1_PANTR	Keratin, type II cytoskeletal 1 OS=Pan troglodytes GN=KRT1 PE=2 SV=1	14690	65588	472	472	25	25	Pan troglodytes	9598	121486	1	0	1	717.367	2149.08	3	2149.07	0.0083	1	29	0.0019	R	THNLEPYFESFINNLRR	R					Nh3_BSA
1		K2C1_PANTR	Keratin, type II cytoskeletal 1 OS=Pan troglodytes GN=KRT1 PE=2 SV=1	14690	65588	472	472	25	25	Pan troglodytes	9598	121487	1	0	1	717.367	2149.08	3	2149.07	0.0083	1	37.06	0.00033	R	THNLEPYFESFINNLRR	R					Nh3_BSA
1		K2C1_PANTR	Keratin, type II cytoskeletal 1 OS=Pan troglodytes GN=KRT1 PE=2 SV=1	14690	65588	472	472	25	25	Pan troglodytes	9598	121488	1	0	1	717.367	2149.08	3	2149.07	0.0095	1	33.98	0.00071	R	THNLEPYFESFINNLRR	R					Ar_NoBSA
1		K2C1_PANTR	Keratin, type II cytoskeletal 1 OS=Pan troglodytes GN=KRT1 PE=2 SV=1	14690	65588	472	472	25	25	Pan troglodytes	9598	121493	1	0	1	717.368	2149.08	3	2149.07	0.0118	1	32.21	0.00095	R	THNLEPYFESFINNLRR	R					NoBSA
1		K2C1_PANTR	Keratin, type II cytoskeletal 1 OS=Pan troglodytes GN=KRT1 PE=2 SV=1	14690	65588	472	472	25	25	Pan troglodytes	9598	121495	1	0	1	717.368	2149.08	3	2149.07	0.0129	1	35.35	0.00048	R	THNLEPYFESFINNLRR	R					Nh3_NoBSA
1		K2C1_PANTR	Keratin, type II cytoskeletal 1 OS=Pan troglodytes GN=KRT1 PE=2 SV=1	14690	65588	472	472	25	25	Pan troglodytes	9598	121498	1	0	1	717.369	2149.09	3	2149.07	0.0154	1	29.98	0.0015	R	THNLEPYFESFINNLRR	R					NoBSA
1		K2C1_PANTR	Keratin, type II cytoskeletal 1 OS=Pan troglodytes GN=KRT1 PE=2 SV=1	14690	65588	472	472	25	25	Pan troglodytes	9598	121499	1	0	1	717.369	2149.09	3	2149.07	0.0155	1	39.71	0.00026	R	THNLEPYFESFINNLRR	R					Un_NoBSA
1		K2C1_PANTR	Keratin, type II cytoskeletal 1 OS=Pan troglodytes GN=KRT1 PE=2 SV=1	14690	65588	472	472	25	25	Pan troglodytes	9598	121501	1	0	1	717.37	2149.09	3	2149.07	0.0162	1	36.7	0.00036	R	THNLEPYFESFINNLRR	R					Nh3_NoBSA
1		K2C1_PANTR	Keratin, type II cytoskeletal 1 OS=Pan troglodytes GN=KRT1 PE=2 SV=1	14690	65588	472	472	25	25	Pan troglodytes	9598	121502	1	0	1	717.371	2149.09	3	2149.07	0.0196	1	26.67	0.0032	R	THNLEPYFESFINNLRR	R					N2_BSA
1		K2C1_PANTR	Keratin, type II cytoskeletal 1 OS=Pan troglodytes GN=KRT1 PE=2 SV=1	14690	65588	472	472	25	25	Pan troglodytes	9598	121548	1	0	1	717.69	2150.05	3	2150.05	-0.0054	1	22.33	0.008	R	THNLEPYFESFINNLRR	R	Deamidated (NQ)	0.00000000000010000.0			Nh3_BSA
1		K2C1_PANTR	Keratin, type II cytoskeletal 1 OS=Pan troglodytes GN=KRT1 PE=2 SV=1	14690	65588	472	472	25	25	Pan troglodytes	9598	121551	1	0	1	717.691	2150.05	3	2150.05	-0.0032	1	24.25	0.0053	R	THNLEPYFESFINNLRR	R	Deamidated (NQ)	0.00000000000010000.0			N2_NoBSA
1		K2C1_PANTR	Keratin, type II cytoskeletal 1 OS=Pan troglodytes GN=KRT1 PE=2 SV=1	14690	65588	472	472	25	25	Pan troglodytes	9598	121555	1	0	1	717.692	2150.05	3	2150.05	-0.0019	1	22.61	0.0096	R	THNLEPYFESFINNLRR	R	Deamidated (NQ)	0.00000000000010000.0			BSA
1		K2C1_PANTR	Keratin, type II cytoskeletal 1 OS=Pan troglodytes GN=KRT1 PE=2 SV=1	14690	65588	472	472	25	25	Pan troglodytes	9598	121557	1	0	1	717.692	2150.05	3	2150.05	-0.0004	1	23.78	0.0059	R	THNLEPYFESFINNLRR	R	Deamidated (NQ)	0.00000000000010000.0			N2_BSA
1		K2C1_PANTR	Keratin, type II cytoskeletal 1 OS=Pan troglodytes GN=KRT1 PE=2 SV=1	14690	65588	472	472	25	25	Pan troglodytes	9598	121567	1	0	1	717.694	2150.06	3	2150.05	0.0058	1	25.57	0.0047	R	THNLEPYFESFINNLRR	R	Deamidated (NQ)	0.00000000000010000.0			Ar_BSA
1		K2C1_PANTR	Keratin, type II cytoskeletal 1 OS=Pan troglodytes GN=KRT1 PE=2 SV=1	14690	65588	472	472	25	25	Pan troglodytes	9598	121568	1	0	1	717.694	2150.06	3	2150.05	0.0066	1	25.94	0.0037	R	THNLEPYFESFINNLRR	R	Deamidated (NQ)	0.00000000000010000.0			Ar_BSA
1		K2C1_PANTR	Keratin, type II cytoskeletal 1 OS=Pan troglodytes GN=KRT1 PE=2 SV=1	14690	65588	472	472	25	25	Pan troglodytes	9598	121574	1	0	1	717.695	2150.06	3	2150.05	0.0087	1	32.57	0.00088	R	THNLEPYFESFINNLRR	R	Deamidated (NQ)	0.00000000000010000.0			Ar_BSA
1		K2C1_PANTR	Keratin, type II cytoskeletal 1 OS=Pan troglodytes GN=KRT1 PE=2 SV=1	14690	65588	472	472	25	25	Pan troglodytes	9598	121578	1	0	1	717.697	2150.07	3	2150.05	0.0135	1	26.75	0.0031	R	THNLEPYFESFINNLRR	R	Deamidated (NQ)	0.00000000000010000.0			Un_NoBSA
1		K2C1_PANTR	Keratin, type II cytoskeletal 1 OS=Pan troglodytes GN=KRT1 PE=2 SV=1	14690	65588	472	472	25	25	Pan troglodytes	9598	121582	1	0	1	717.698	2150.07	3	2150.05	0.0174	1	36.58	0.00037	R	THNLEPYFESFINNLRR	R	Deamidated (NQ)	0.00000000000001000.0			N2_NoBSA
1		K2C1_PANTR	Keratin, type II cytoskeletal 1 OS=Pan troglodytes GN=KRT1 PE=2 SV=1	14690	65588	472	472	25	25	Pan troglodytes	9598	125769	1	0	1	762.71	2285.11	3	2285.12	-0.0095	1	40.03	0.00025	K	AEAESLYQSKYEELQITAGR	H					Nh3_NoBSA
1		K2C1_PANTR	Keratin, type II cytoskeletal 1 OS=Pan troglodytes GN=KRT1 PE=2 SV=1	14690	65588	472	472	25	25	Pan troglodytes	9598	125770	1	0	1	762.711	2285.11	3	2285.12	-0.0051	1	43.14	9e-05	K	AEAESLYQSKYEELQITAGR	H					Nh3_NoBSA
1		K2C1_PANTR	Keratin, type II cytoskeletal 1 OS=Pan troglodytes GN=KRT1 PE=2 SV=1	14690	65588	472	472	25	25	Pan troglodytes	9598	125771	1	0	1	762.712	2285.11	3	2285.12	-0.0048	1	54.2	8.3e-06	K	AEAESLYQSKYEELQITAGR	H					BSA
1		K2C1_PANTR	Keratin, type II cytoskeletal 1 OS=Pan troglodytes GN=KRT1 PE=2 SV=1	14690	65588	472	472	25	25	Pan troglodytes	9598	125772	1	0	1	762.713	2285.12	3	2285.12	-0.0016	1	42.67	0.0001	K	AEAESLYQSKYEELQITAGR	H					N2_BSA
1		K2C1_PANTR	Keratin, type II cytoskeletal 1 OS=Pan troglodytes GN=KRT1 PE=2 SV=1	14690	65588	472	472	25	25	Pan troglodytes	9598	125773	1	0	1	762.713	2285.12	3	2285.12	-0.0009	1	44.81	6.3e-05	K	AEAESLYQSKYEELQITAGR	H					Un_NoBSA
1		K2C1_PANTR	Keratin, type II cytoskeletal 1 OS=Pan troglodytes GN=KRT1 PE=2 SV=1	14690	65588	472	472	25	25	Pan troglodytes	9598	125774	1	0	1	762.713	2285.12	3	2285.12	0.001	1	50.74	2.4e-05	K	AEAESLYQSKYEELQITAGR	H					N2_NoBSA
1		K2C1_PANTR	Keratin, type II cytoskeletal 1 OS=Pan troglodytes GN=KRT1 PE=2 SV=1	14690	65588	472	472	25	25	Pan troglodytes	9598	125775	1	0	1	762.713	2285.12	3	2285.12	0.0012	1	38.4	0.00025	K	AEAESLYQSKYEELQITAGR	H					Un_BSA
1		K2C1_PANTR	Keratin, type II cytoskeletal 1 OS=Pan troglodytes GN=KRT1 PE=2 SV=1	14690	65588	472	472	25	25	Pan troglodytes	9598	125776	1	0	1	762.714	2285.12	3	2285.12	0.0024	1	28.45	0.0027	K	AEAESLYQSKYEELQITAGR	H					N2_NoBSA
1		K2C1_PANTR	Keratin, type II cytoskeletal 1 OS=Pan troglodytes GN=KRT1 PE=2 SV=1	14690	65588	472	472	25	25	Pan troglodytes	9598	125777	1	0	1	762.714	2285.12	3	2285.12	0.0029	1	54.42	8.7e-06	K	AEAESLYQSKYEELQITAGR	H					BSA
1		K2C1_PANTR	Keratin, type II cytoskeletal 1 OS=Pan troglodytes GN=KRT1 PE=2 SV=1	14690	65588	472	472	25	25	Pan troglodytes	9598	125778	1	0	1	762.714	2285.12	3	2285.12	0.003	1	55.64	6.1e-06	K	AEAESLYQSKYEELQITAGR	H					BSA
1		K2C1_PANTR	Keratin, type II cytoskeletal 1 OS=Pan troglodytes GN=KRT1 PE=2 SV=1	14690	65588	472	472	25	25	Pan troglodytes	9598	125779	1	0	1	762.715	2285.12	3	2285.12	0.0045	1	52.03	2.1e-05	K	AEAESLYQSKYEELQITAGR	H					N2_NoBSA
1		K2C1_PANTR	Keratin, type II cytoskeletal 1 OS=Pan troglodytes GN=KRT1 PE=2 SV=1	14690	65588	472	472	25	25	Pan troglodytes	9598	125780	1	0	1	762.715	2285.12	3	2285.12	0.0051	1	51.25	1.9e-05	K	AEAESLYQSKYEELQITAGR	H					Ar_NoBSA
1		K2C1_PANTR	Keratin, type II cytoskeletal 1 OS=Pan troglodytes GN=KRT1 PE=2 SV=1	14690	65588	472	472	25	25	Pan troglodytes	9598	125781	1	0	1	762.715	2285.12	3	2285.12	0.0069	1	67.4	8.1e-07	K	AEAESLYQSKYEELQITAGR	H					Ar_BSA
1		K2C1_PANTR	Keratin, type II cytoskeletal 1 OS=Pan troglodytes GN=KRT1 PE=2 SV=1	14690	65588	472	472	25	25	Pan troglodytes	9598	125782	1	0	1	762.716	2285.13	3	2285.12	0.01	1	50.22	3.8e-05	K	AEAESLYQSKYEELQITAGR	H					Nh3_BSA
1		K2C1_PANTR	Keratin, type II cytoskeletal 1 OS=Pan troglodytes GN=KRT1 PE=2 SV=1	14690	65588	472	472	25	25	Pan troglodytes	9598	125783	1	0	1	762.717	2285.13	3	2285.12	0.0108	1	60.15	3.5e-06	K	AEAESLYQSKYEELQITAGR	H					Un_NoBSA
1		K2C1_PANTR	Keratin, type II cytoskeletal 1 OS=Pan troglodytes GN=KRT1 PE=2 SV=1	14690	65588	472	472	25	25	Pan troglodytes	9598	125784	1	0	1	762.717	2285.13	3	2285.12	0.0119	1	62.25	1.5e-06	K	AEAESLYQSKYEELQITAGR	H					Nh3_BSA
1		K2C1_PANTR	Keratin, type II cytoskeletal 1 OS=Pan troglodytes GN=KRT1 PE=2 SV=1	14690	65588	472	472	25	25	Pan troglodytes	9598	125785	1	0	1	762.717	2285.13	3	2285.12	0.0129	1	48.82	2.6e-05	K	AEAESLYQSKYEELQITAGR	H					Un_NoBSA
1		K2C1_PANTR	Keratin, type II cytoskeletal 1 OS=Pan troglodytes GN=KRT1 PE=2 SV=1	14690	65588	472	472	25	25	Pan troglodytes	9598	125786	1	0	1	762.718	2285.13	3	2285.12	0.0152	1	84.69	2e-08	K	AEAESLYQSKYEELQITAGR	H					Ar_BSA
1		K2C1_PANTR	Keratin, type II cytoskeletal 1 OS=Pan troglodytes GN=KRT1 PE=2 SV=1	14690	65588	472	472	25	25	Pan troglodytes	9598	125787	1	0	1	762.718	2285.13	3	2285.12	0.0158	1	43.26	8.8e-05	K	AEAESLYQSKYEELQITAGR	H					Ar_BSA
1		K2C1_PANTR	Keratin, type II cytoskeletal 1 OS=Pan troglodytes GN=KRT1 PE=2 SV=1	14690	65588	472	472	25	25	Pan troglodytes	9598	125794	1	0	1	763.044	2286.11	3	2286.1	0.0085	1	46.99	4.5e-05	K	AEAESLYQSKYEELQITAGR	H	Deamidated (NQ)	0.00000001000000000000.0			NoBSA
1		K2C1_PANTR	Keratin, type II cytoskeletal 1 OS=Pan troglodytes GN=KRT1 PE=2 SV=1	14690	65588	472	472	25	25	Pan troglodytes	9598	125752	1	0	1	763.046	2286.12	3	2286.1	0.0155	1	38.48	0.00026	K	AEAESLYQSKYEELQITAGR	H	Deamidated (NQ)	0.00000001000000000000.0			Ar_NoBSA
1		K2C1_PANTR	Keratin, type II cytoskeletal 1 OS=Pan troglodytes GN=KRT1 PE=2 SV=1	14690	65588	472	472	25	25	Pan troglodytes	9598	125755	1	0	1	763.048	2286.12	3	2286.1	0.0204	1	45.46	8.7e-05	K	AEAESLYQSKYEELQITAGR	H	Deamidated (NQ)	0.00000001000000000000.0			NoBSA
1		K2C1_PANTR	Keratin, type II cytoskeletal 1 OS=Pan troglodytes GN=KRT1 PE=2 SV=1	14690	65588	472	472	25	25	Pan troglodytes	9598	127328	1	0	1	777.064	2328.17	3	2328.17	0.0025	1	23.79	0.0059	K	QISNLQQSISDAEQRGENALK	D					N2_BSA
1		K2C1_PANTR	Keratin, type II cytoskeletal 1 OS=Pan troglodytes GN=KRT1 PE=2 SV=1	14690	65588	472	472	25	25	Pan troglodytes	9598	127719	1	0	1	783.737	2348.19	3	2348.21	-0.0227	1	51.14	2.6e-05	R	SLDLDSIIAEVKAQYEDIAQK	S					Nh3_BSA
1		K2C1_PANTR	Keratin, type II cytoskeletal 1 OS=Pan troglodytes GN=KRT1 PE=2 SV=1	14690	65588	472	472	25	25	Pan troglodytes	9598	127720	1	0	1	783.74	2348.2	3	2348.21	-0.0116	1	47.64	3.4e-05	R	SLDLDSIIAEVKAQYEDIAQK	S					Un_BSA
1		K2C1_PANTR	Keratin, type II cytoskeletal 1 OS=Pan troglodytes GN=KRT1 PE=2 SV=1	14690	65588	472	472	25	25	Pan troglodytes	9598	127721	1	0	1	783.741	2348.2	3	2348.21	-0.0105	1	42.56	0.00019	R	SLDLDSIIAEVKAQYEDIAQK	S					Ar_BSA
1		K2C1_PANTR	Keratin, type II cytoskeletal 1 OS=Pan troglodytes GN=KRT1 PE=2 SV=1	14690	65588	472	472	25	25	Pan troglodytes	9598	127722	1	0	1	783.741	2348.2	3	2348.21	-0.0087	1	39.04	0.00022	R	SLDLDSIIAEVKAQYEDIAQK	S					Ar_BSA
1		K2C1_PANTR	Keratin, type II cytoskeletal 1 OS=Pan troglodytes GN=KRT1 PE=2 SV=1	14690	65588	472	472	25	25	Pan troglodytes	9598	127724	1	0	1	783.743	2348.21	3	2348.21	-0.0048	1	49.49	2.3e-05	R	SLDLDSIIAEVKAQYEDIAQK	S					N2_BSA
1		K2C1_PANTR	Keratin, type II cytoskeletal 1 OS=Pan troglodytes GN=KRT1 PE=2 SV=1	14690	65588	472	472	25	25	Pan troglodytes	9598	127725	1	0	1	783.743	2348.21	3	2348.21	-0.003	1	44.6	7.2e-05	R	SLDLDSIIAEVKAQYEDIAQK	S					N2_NoBSA
1		K2C1_PANTR	Keratin, type II cytoskeletal 1 OS=Pan troglodytes GN=KRT1 PE=2 SV=1	14690	65588	472	472	25	25	Pan troglodytes	9598	127726	1	0	1	783.743	2348.21	3	2348.21	-0.003	1	50.03	2e-05	R	SLDLDSIIAEVKAQYEDIAQK	S					Nh3_BSA
1		K2C1_PANTR	Keratin, type II cytoskeletal 1 OS=Pan troglodytes GN=KRT1 PE=2 SV=1	14690	65588	472	472	25	25	Pan troglodytes	9598	127727	1	0	1	783.744	2348.21	3	2348.21	-0.0009	1	41.04	0.00014	R	SLDLDSIIAEVKAQYEDIAQK	S					BSA
1		K2C1_PANTR	Keratin, type II cytoskeletal 1 OS=Pan troglodytes GN=KRT1 PE=2 SV=1	14690	65588	472	472	25	25	Pan troglodytes	9598	127728	1	0	1	783.744	2348.21	3	2348.21	0.0002	1	49.07	2.5e-05	R	SLDLDSIIAEVKAQYEDIAQK	S					Ar_NoBSA
1		K2C1_PANTR	Keratin, type II cytoskeletal 1 OS=Pan troglodytes GN=KRT1 PE=2 SV=1	14690	65588	472	472	25	25	Pan troglodytes	9598	127729	1	0	1	783.745	2348.21	3	2348.21	0.0017	1	30.17	0.0028	R	SLDLDSIIAEVKAQYEDIAQK	S					Un_BSA
1		K2C1_PANTR	Keratin, type II cytoskeletal 1 OS=Pan troglodytes GN=KRT1 PE=2 SV=1	14690	65588	472	472	25	25	Pan troglodytes	9598	127730	1	0	1	783.746	2348.22	3	2348.21	0.0043	1	72.87	1.5e-07	R	SLDLDSIIAEVKAQYEDIAQK	S					Un_NoBSA
1		K2C1_PANTR	Keratin, type II cytoskeletal 1 OS=Pan troglodytes GN=KRT1 PE=2 SV=1	14690	65588	472	472	25	25	Pan troglodytes	9598	127731	1	0	1	783.746	2348.22	3	2348.21	0.006	1	58.23	5.8e-06	R	SLDLDSIIAEVKAQYEDIAQK	S					Nh3_NoBSA
1		K2C1_PANTR	Keratin, type II cytoskeletal 1 OS=Pan troglodytes GN=KRT1 PE=2 SV=1	14690	65588	472	472	25	25	Pan troglodytes	9598	127734	1	0	1	783.75	2348.23	3	2348.21	0.016	1	39.53	0.0002	R	SLDLDSIIAEVKAQYEDIAQK	S					Un_NoBSA
1		K2C1_PANTR	Keratin, type II cytoskeletal 1 OS=Pan troglodytes GN=KRT1 PE=2 SV=1	14690	65588	472	472	25	25	Pan troglodytes	9598	127735	1	0	1	783.75	2348.23	3	2348.21	0.0169	1	64.07	1.1e-06	R	SLDLDSIIAEVKAQYEDIAQK	S					Nh3_NoBSA
1		K2C1_PANTR	Keratin, type II cytoskeletal 1 OS=Pan troglodytes GN=KRT1 PE=2 SV=1	14690	65588	472	472	25	25	Pan troglodytes	9598	127802	1	0	1	784.074	2349.2	3	2349.2	0.0043	1	24.71	0.0048	R	SLDLDSIIAEVKAQYEDIAQK	S	Deamidated (NQ)	0.000000000000010000000.0			N2_BSA
1		K2C1_PANTR	Keratin, type II cytoskeletal 1 OS=Pan troglodytes GN=KRT1 PE=2 SV=1	14690	65588	472	472	25	25	Pan troglodytes	9598	127695	1	0	1	784.076	2349.21	3	2349.2	0.0105	1	35.63	0.00047	R	SLDLDSIIAEVKAQYEDIAQK	S	Deamidated (NQ)	0.000000000000010000000.0			Un_BSA
1		K2C1_PANTR	Keratin, type II cytoskeletal 1 OS=Pan troglodytes GN=KRT1 PE=2 SV=1	14690	65588	472	472	25	25	Pan troglodytes	9598	136319	1	0	1	978.169	2931.49	3	2931.51	-0.0226	1	36.71	0.00055	R	FLEQQNQVLQTKWELLQQVDTSTR	T					Un_NoBSA
1		K2C1_PANTR	Keratin, type II cytoskeletal 1 OS=Pan troglodytes GN=KRT1 PE=2 SV=1	14690	65588	472	472	25	25	Pan troglodytes	9598	136358	1	0	1	978.503	2932.49	3	2932.49	-0.0063	1	50.89	0.00024	R	FLEQQNQVLQTKWELLQQVDTSTR	T	Deamidated (NQ)	0.000000000100000000000000.0			BSA
1		K2C1_PANTR	Keratin, type II cytoskeletal 1 OS=Pan troglodytes GN=KRT1 PE=2 SV=1	14690	65588	472	472	25	25	Pan troglodytes	9598	136359	1	0	1	978.507	2932.5	3	2932.49	0.0067	1	38.25	0.0037	R	FLEQQNQVLQTKWELLQQVDTSTR	T	Deamidated (NQ)	0.000000000100000000000000.0			NoBSA
1		K2C1_PANTR	Keratin, type II cytoskeletal 1 OS=Pan troglodytes GN=KRT1 PE=2 SV=1	14690	65588	472	472	25	25	Pan troglodytes	9598	140846	1	0	1	1104.76	3311.27	3	3311.3	-0.0298	0	69.55	3.1e-07	R	GSYGSGGSSYGSGGGSYGSGGGGGGHGSYGSGSSSGGYR	G					Nh3_NoBSA
1		K2C1_PANTR	Keratin, type II cytoskeletal 1 OS=Pan troglodytes GN=KRT1 PE=2 SV=1	14690	65588	472	472	25	25	Pan troglodytes	9598	140847	1	0	1	1104.77	3311.27	3	3311.3	-0.0277	0	49.09	3.6e-05	R	GSYGSGGSSYGSGGGSYGSGGGGGGHGSYGSGSSSGGYR	G					Un_BSA
1		K2C1_CANLF	Keratin, type II cytoskeletal 1 OS=Canis lupus familiaris GN=KRT1 PE=2 SV=1	6555	63889	210	210	9	9	Canis lupus familiaris	9615	60867	1	0	1	633.324	1264.63	2	1264.63	0.0036	0	51.51	5.2e-05	R	TNAENEFVTIK	K					NoBSA
1		K2C1_CANLF	Keratin, type II cytoskeletal 1 OS=Canis lupus familiaris GN=KRT1 PE=2 SV=1	6555	63889	210	210	9	9	Canis lupus familiaris	9615	60873	1	0	1	633.327	1264.64	2	1264.63	0.0087	0	53.3	1.6e-05	R	TNAENEFVTIK	K					N2_BSA
1		K2C1_CANLF	Keratin, type II cytoskeletal 1 OS=Canis lupus familiaris GN=KRT1 PE=2 SV=1	6555	63889	210	210	9	9	Canis lupus familiaris	9615	60874	1	0	1	633.327	1264.64	2	1264.63	0.0087	0	39.48	0.0002	R	TNAENEFVTIK	K					Un_BSA
1		K2C1_CANLF	Keratin, type II cytoskeletal 1 OS=Canis lupus familiaris GN=KRT1 PE=2 SV=1	6555	63889	210	210	9	9	Canis lupus familiaris	9615	60875	1	0	1	633.327	1264.64	2	1264.63	0.0096	0	41.11	0.00015	R	TNAENEFVTIK	K					Ar_BSA
1		K2C1_CANLF	Keratin, type II cytoskeletal 1 OS=Canis lupus familiaris GN=KRT1 PE=2 SV=1	6555	63889	210	210	9	9	Canis lupus familiaris	9615	60879	1	0	1	633.328	1264.64	2	1264.63	0.0126	0	41.05	0.00034	R	TNAENEFVTIK	K					N2_NoBSA
1		K2C1_CANLF	Keratin, type II cytoskeletal 1 OS=Canis lupus familiaris GN=KRT1 PE=2 SV=1	6555	63889	210	210	9	9	Canis lupus familiaris	9615	75784	1	0	1	692.345	1382.67	2	1382.68	-0.0084	0	48.07	5.1e-05	K	SLNNQFASFIDK	V					Ar_NoBSA
1		K2C1_CANLF	Keratin, type II cytoskeletal 1 OS=Canis lupus familiaris GN=KRT1 PE=2 SV=1	6555	63889	210	210	9	9	Canis lupus familiaris	9615	75785	1	0	1	692.347	1382.68	2	1382.68	-0.0036	0	53.45	3.4e-05	K	SLNNQFASFIDK	V					N2_NoBSA
1		K2C1_CANLF	Keratin, type II cytoskeletal 1 OS=Canis lupus familiaris GN=KRT1 PE=2 SV=1	6555	63889	210	210	9	9	Canis lupus familiaris	9615	75787	1	0	1	692.348	1382.68	2	1382.68	-0.0021	0	60.28	9.6e-06	K	SLNNQFASFIDK	V					N2_BSA
1		K2C1_CANLF	Keratin, type II cytoskeletal 1 OS=Canis lupus familiaris GN=KRT1 PE=2 SV=1	6555	63889	210	210	9	9	Canis lupus familiaris	9615	75792	1	0	1	692.35	1382.68	2	1382.68	0.0016	0	62.37	1.2e-05	K	SLNNQFASFIDK	V					Ar_BSA
1		K2C1_CANLF	Keratin, type II cytoskeletal 1 OS=Canis lupus familiaris GN=KRT1 PE=2 SV=1	6555	63889	210	210	9	9	Canis lupus familiaris	9615	75794	1	0	1	692.351	1382.69	2	1382.68	0.0034	0	73.82	5.8e-07	K	SLNNQFASFIDK	V					Nh3_BSA
1		K2C1_CANLF	Keratin, type II cytoskeletal 1 OS=Canis lupus familiaris GN=KRT1 PE=2 SV=1	6555	63889	210	210	9	9	Canis lupus familiaris	9615	75795	1	0	1	692.351	1382.69	2	1382.68	0.004	0	49.57	0.00014	K	SLNNQFASFIDK	V					NoBSA
1		K2C1_CANLF	Keratin, type II cytoskeletal 1 OS=Canis lupus familiaris GN=KRT1 PE=2 SV=1	6555	63889	210	210	9	9	Canis lupus familiaris	9615	75796	1	0	1	692.351	1382.69	2	1382.68	0.004	0	99.51	4.1e-09	K	SLNNQFASFIDK	V					Ar_NoBSA
1		K2C1_CANLF	Keratin, type II cytoskeletal 1 OS=Canis lupus familiaris GN=KRT1 PE=2 SV=1	6555	63889	210	210	9	9	Canis lupus familiaris	9615	75798	1	0	1	692.351	1382.69	2	1382.68	0.0047	0	76.64	8.2e-07	K	SLNNQFASFIDK	V					N2_NoBSA
1		K2C1_CANLF	Keratin, type II cytoskeletal 1 OS=Canis lupus familiaris GN=KRT1 PE=2 SV=1	6555	63889	210	210	9	9	Canis lupus familiaris	9615	75800	1	0	1	692.351	1382.69	2	1382.68	0.0048	0	35.51	0.00047	K	SLNNQFASFIDK	V					Un_BSA
1		K2C1_CANLF	Keratin, type II cytoskeletal 1 OS=Canis lupus familiaris GN=KRT1 PE=2 SV=1	6555	63889	210	210	9	9	Canis lupus familiaris	9615	75801	1	0	1	692.352	1382.69	2	1382.68	0.006	0	37.24	0.00032	K	SLNNQFASFIDK	V					Nh3_BSA
1		K2C1_CANLF	Keratin, type II cytoskeletal 1 OS=Canis lupus familiaris GN=KRT1 PE=2 SV=1	6555	63889	210	210	9	9	Canis lupus familiaris	9615	75803	1	0	1	692.352	1382.69	2	1382.68	0.0065	0	38.13	0.00027	K	SLNNQFASFIDK	V					Nh3_NoBSA
1		K2C1_CANLF	Keratin, type II cytoskeletal 1 OS=Canis lupus familiaris GN=KRT1 PE=2 SV=1	6555	63889	210	210	9	9	Canis lupus familiaris	9615	75804	1	0	1	692.352	1382.69	2	1382.68	0.0066	0	68.21	2.4e-06	K	SLNNQFASFIDK	V					NoBSA
1		K2C1_CANLF	Keratin, type II cytoskeletal 1 OS=Canis lupus familiaris GN=KRT1 PE=2 SV=1	6555	63889	210	210	9	9	Canis lupus familiaris	9615	75806	1	0	1	692.352	1382.69	2	1382.68	0.0067	0	65.6	4.9e-06	K	SLNNQFASFIDK	V					BSA
1		K2C1_CANLF	Keratin, type II cytoskeletal 1 OS=Canis lupus familiaris GN=KRT1 PE=2 SV=1	6555	63889	210	210	9	9	Canis lupus familiaris	9615	75809	1	0	1	692.353	1382.69	2	1382.68	0.0084	0	65.34	6e-06	K	SLNNQFASFIDK	V					N2_BSA
1		K2C1_CANLF	Keratin, type II cytoskeletal 1 OS=Canis lupus familiaris GN=KRT1 PE=2 SV=1	6555	63889	210	210	9	9	Canis lupus familiaris	9615	75810	1	0	1	692.353	1382.69	2	1382.68	0.0084	0	74.19	1.5e-06	K	SLNNQFASFIDK	V					Nh3_NoBSA
1		K2C1_CANLF	Keratin, type II cytoskeletal 1 OS=Canis lupus familiaris GN=KRT1 PE=2 SV=1	6555	63889	210	210	9	9	Canis lupus familiaris	9615	75813	1	0	1	692.353	1382.69	2	1382.68	0.0088	0	93.35	1.9e-08	K	SLNNQFASFIDK	V					Ar_BSA
1		K2C1_CANLF	Keratin, type II cytoskeletal 1 OS=Canis lupus familiaris GN=KRT1 PE=2 SV=1	6555	63889	210	210	9	9	Canis lupus familiaris	9615	75815	1	0	1	692.353	1382.69	2	1382.68	0.0091	0	93.26	1.5e-08	K	SLNNQFASFIDK	V					Un_BSA
1		K2C1_CANLF	Keratin, type II cytoskeletal 1 OS=Canis lupus familiaris GN=KRT1 PE=2 SV=1	6555	63889	210	210	9	9	Canis lupus familiaris	9615	75817	1	0	1	692.353	1382.69	2	1382.68	0.0091	0	70.2	8.4e-07	K	SLNNQFASFIDK	V					Ar_NoBSA
1		K2C1_CANLF	Keratin, type II cytoskeletal 1 OS=Canis lupus familiaris GN=KRT1 PE=2 SV=1	6555	63889	210	210	9	9	Canis lupus familiaris	9615	75818	1	0	1	692.353	1382.69	2	1382.68	0.0092	0	51.4	4.9e-05	K	SLNNQFASFIDK	V					NoBSA
1		K2C1_CANLF	Keratin, type II cytoskeletal 1 OS=Canis lupus familiaris GN=KRT1 PE=2 SV=1	6555	63889	210	210	9	9	Canis lupus familiaris	9615	75822	1	0	1	692.354	1382.69	2	1382.68	0.0098	0	93.33	1.5e-08	K	SLNNQFASFIDK	V					Nh3_NoBSA
1		K2C1_CANLF	Keratin, type II cytoskeletal 1 OS=Canis lupus familiaris GN=KRT1 PE=2 SV=1	6555	63889	210	210	9	9	Canis lupus familiaris	9615	75823	1	0	1	692.354	1382.69	2	1382.68	0.01	0	93.23	1.8e-08	K	SLNNQFASFIDK	V					BSA
1		K2C1_CANLF	Keratin, type II cytoskeletal 1 OS=Canis lupus familiaris GN=KRT1 PE=2 SV=1	6555	63889	210	210	9	9	Canis lupus familiaris	9615	75824	1	0	1	692.354	1382.69	2	1382.68	0.0109	0	31.08	0.0026	K	SLNNQFASFIDK	V					NoBSA
1		K2C1_CANLF	Keratin, type II cytoskeletal 1 OS=Canis lupus familiaris GN=KRT1 PE=2 SV=1	6555	63889	210	210	9	9	Canis lupus familiaris	9615	75827	1	0	1	692.355	1382.69	2	1382.68	0.0115	0	64.29	8.1e-06	K	SLNNQFASFIDK	V					BSA
1		K2C1_CANLF	Keratin, type II cytoskeletal 1 OS=Canis lupus familiaris GN=KRT1 PE=2 SV=1	6555	63889	210	210	9	9	Canis lupus familiaris	9615	75828	1	0	1	692.355	1382.7	2	1382.68	0.0125	0	93.31	1.9e-08	K	SLNNQFASFIDK	V					Nh3_NoBSA
1		K2C1_CANLF	Keratin, type II cytoskeletal 1 OS=Canis lupus familiaris GN=KRT1 PE=2 SV=1	6555	63889	210	210	9	9	Canis lupus familiaris	9615	75937	1	0	1	692.844	1383.67	2	1383.67	0.0063	0	73.19	5.7e-07	K	SLNNQFASFIDK	V	Deamidated (NQ)	0.000010000000.0			Nh3_BSA
1		K2C1_CANLF	Keratin, type II cytoskeletal 1 OS=Canis lupus familiaris GN=KRT1 PE=2 SV=1	6555	63889	210	210	9	9	Canis lupus familiaris	9615	75938	1	0	1	692.845	1383.67	2	1383.67	0.0076	0	56.42	5.1e-06	K	SLNNQFASFIDK	V	Deamidated (NQ)	0.000100000000.0			Un_NoBSA
1		K2C1_CANLF	Keratin, type II cytoskeletal 1 OS=Canis lupus familiaris GN=KRT1 PE=2 SV=1	6555	63889	210	210	9	9	Canis lupus familiaris	9615	75939	1	0	1	692.847	1383.68	2	1383.67	0.0126	0	28.88	0.002	K	SLNNQFASFIDK	V	Deamidated (NQ)	0.000100000000.0			Un_BSA
1		K2C1_CANLF	Keratin, type II cytoskeletal 1 OS=Canis lupus familiaris GN=KRT1 PE=2 SV=1	6555	63889	210	210	9	9	Canis lupus familiaris	9615	77028	1	0	1	697.368	1392.72	2	1392.72	-0.0033	1	73.46	1e-06	R	TNAENEFVTIKK	D					Un_NoBSA
1		K2C1_CANLF	Keratin, type II cytoskeletal 1 OS=Canis lupus familiaris GN=KRT1 PE=2 SV=1	6555	63889	210	210	9	9	Canis lupus familiaris	9615	77034	1	0	1	697.369	1392.72	2	1392.72	-0.0012	1	73.99	1.6e-06	R	TNAENEFVTIKK	D					BSA
1		K2C1_CANLF	Keratin, type II cytoskeletal 1 OS=Canis lupus familiaris GN=KRT1 PE=2 SV=1	6555	63889	210	210	9	9	Canis lupus familiaris	9615	77035	1	0	1	697.372	1392.73	2	1392.72	0.0047	1	74.27	1.3e-06	R	TNAENEFVTIKK	D					Nh3_NoBSA
1		K2C1_CANLF	Keratin, type II cytoskeletal 1 OS=Canis lupus familiaris GN=KRT1 PE=2 SV=1	6555	63889	210	210	9	9	Canis lupus familiaris	9615	77038	1	0	1	697.372	1392.73	2	1392.72	0.0055	1	73.77	5.4e-07	R	TNAENEFVTIKK	D					Un_NoBSA
1		K2C1_CANLF	Keratin, type II cytoskeletal 1 OS=Canis lupus familiaris GN=KRT1 PE=2 SV=1	6555	63889	210	210	9	9	Canis lupus familiaris	9615	77039	1	0	1	697.372	1392.73	2	1392.72	0.0056	1	79.05	4.2e-07	R	TNAENEFVTIKK	D					Un_BSA
1		K2C1_CANLF	Keratin, type II cytoskeletal 1 OS=Canis lupus familiaris GN=KRT1 PE=2 SV=1	6555	63889	210	210	9	9	Canis lupus familiaris	9615	77040	1	0	1	697.373	1392.73	2	1392.72	0.0061	1	73.9	1e-06	R	TNAENEFVTIKK	D					Un_BSA
1		K2C1_CANLF	Keratin, type II cytoskeletal 1 OS=Canis lupus familiaris GN=KRT1 PE=2 SV=1	6555	63889	210	210	9	9	Canis lupus familiaris	9615	77041	1	0	1	697.373	1392.73	2	1392.72	0.0062	1	56.37	1.6e-05	R	TNAENEFVTIKK	D					Ar_NoBSA
1		K2C1_CANLF	Keratin, type II cytoskeletal 1 OS=Canis lupus familiaris GN=KRT1 PE=2 SV=1	6555	63889	210	210	9	9	Canis lupus familiaris	9615	77042	1	0	1	697.373	1392.73	2	1392.72	0.0065	1	74.29	6e-07	R	TNAENEFVTIKK	D					Ar_NoBSA
1		K2C1_CANLF	Keratin, type II cytoskeletal 1 OS=Canis lupus familiaris GN=KRT1 PE=2 SV=1	6555	63889	210	210	9	9	Canis lupus familiaris	9615	77043	1	0	1	697.373	1392.73	2	1392.72	0.0069	1	60.83	4.8e-06	R	TNAENEFVTIKK	D					Nh3_BSA
1		K2C1_CANLF	Keratin, type II cytoskeletal 1 OS=Canis lupus familiaris GN=KRT1 PE=2 SV=1	6555	63889	210	210	9	9	Canis lupus familiaris	9615	77044	1	0	1	697.373	1392.73	2	1392.72	0.0072	1	64.29	3.6e-06	R	TNAENEFVTIKK	D					NoBSA
1		K2C1_CANLF	Keratin, type II cytoskeletal 1 OS=Canis lupus familiaris GN=KRT1 PE=2 SV=1	6555	63889	210	210	9	9	Canis lupus familiaris	9615	77047	1	0	1	697.374	1392.73	2	1392.72	0.008	1	70.07	3e-06	R	TNAENEFVTIKK	D					N2_BSA
1		K2C1_CANLF	Keratin, type II cytoskeletal 1 OS=Canis lupus familiaris GN=KRT1 PE=2 SV=1	6555	63889	210	210	9	9	Canis lupus familiaris	9615	77048	1	0	1	697.374	1392.73	2	1392.72	0.0087	1	42.41	0.0014	R	TNAENEFVTIKK	D					Nh3_NoBSA
1		K2C1_CANLF	Keratin, type II cytoskeletal 1 OS=Canis lupus familiaris GN=KRT1 PE=2 SV=1	6555	63889	210	210	9	9	Canis lupus familiaris	9615	77049	1	0	1	697.374	1392.73	2	1392.72	0.0087	1	85.17	1e-07	R	TNAENEFVTIKK	D					N2_NoBSA
1		K2C1_CANLF	Keratin, type II cytoskeletal 1 OS=Canis lupus familiaris GN=KRT1 PE=2 SV=1	6555	63889	210	210	9	9	Canis lupus familiaris	9615	77050	1	0	1	697.374	1392.73	2	1392.72	0.0091	1	79.11	4.1e-07	R	TNAENEFVTIKK	D					BSA
1		K2C1_CANLF	Keratin, type II cytoskeletal 1 OS=Canis lupus familiaris GN=KRT1 PE=2 SV=1	6555	63889	210	210	9	9	Canis lupus familiaris	9615	77051	1	0	1	697.374	1392.73	2	1392.72	0.0091	1	61.12	7.1e-06	R	TNAENEFVTIKK	D					Nh3_NoBSA
1		K2C1_CANLF	Keratin, type II cytoskeletal 1 OS=Canis lupus familiaris GN=KRT1 PE=2 SV=1	6555	63889	210	210	9	9	Canis lupus familiaris	9615	77052	1	0	1	697.374	1392.73	2	1392.72	0.0092	1	66.74	2.9e-06	R	TNAENEFVTIKK	D					Nh3_BSA
1		K2C1_CANLF	Keratin, type II cytoskeletal 1 OS=Canis lupus familiaris GN=KRT1 PE=2 SV=1	6555	63889	210	210	9	9	Canis lupus familiaris	9615	77054	1	0	1	697.375	1392.73	2	1392.72	0.0095	1	99.11	2.3e-09	R	TNAENEFVTIKK	D					Ar_BSA
1		K2C1_CANLF	Keratin, type II cytoskeletal 1 OS=Canis lupus familiaris GN=KRT1 PE=2 SV=1	6555	63889	210	210	9	9	Canis lupus familiaris	9615	77057	1	0	1	697.375	1392.74	2	1392.72	0.0105	1	78.92	4.3e-07	R	TNAENEFVTIKK	D					N2_BSA
1		K2C1_CANLF	Keratin, type II cytoskeletal 1 OS=Canis lupus familiaris GN=KRT1 PE=2 SV=1	6555	63889	210	210	9	9	Canis lupus familiaris	9615	77058	1	0	1	697.375	1392.74	2	1392.72	0.0105	1	55.09	2.4e-05	R	TNAENEFVTIKK	D					NoBSA
[truncated: 10,770 more rows]

## Sheet: S-6-Unique peptides per protein
The 5 most differential proteins discussed in the manuscript are displayed.
[truncated: 177 more rows]

[truncated: 7 more sheets: S-7-BSA Block, S-8-LEGEND Supplementary Table2, S-9-Relative protein Content, S-10-All proteins, S-11-Untreated vs Treated, S-12-Yellow population details, S-13-Protein Cell data export]
